# Supplementary material for: Heterochromatin assembly and transcriptome repression by Set1 in coordination with a class II histone deacetylase
Source: eLife. 2014 Dec 15;3:e04506. doi: 10.7554/eLife.04506 (PMC4383021; doi:10.7554/eLife.04506)
Supplement: Figure 2—source data 1. — Set1-targeted transcripts (see Figure 2C) were rank ordered by absolute expression level and divided into quintiles. GO analysis of each quintile was performed as for Figure 1—source data 1. DOI: http://dx.doi.org/10.7554/eLife.04506.006 [file elife04506s003.xlsx]

## Sheet: Figure 2_Table_S1
Table Field Name	Descriptions
Experiment	Set1 enriched target measured by ChIP-chip
ExpressionQuintile	q1 - q5: q1 - highest-abundance transcripts, q5 - lowest abundance transcripts (Figure 2B-C).
GOCategory	Biological Process (BP), Cellular Component (CC), Molecular Function (MF) - top level GO ontology
GOID	Unique GO category term identifier
Pvalue	Hypergeometric test p value for category term over-enrichment
OddsRatio	Odds ratio for category term over-enrichment
ExpCount	Expected Count of genes associated with the GO category term
Count	Count of genes in the set associated with the GO category term
Size	Count of all S. pombe genes associated with the GO category term
Term	GO category term description
Experiment	ExpressionQuintile	GOCategory	GOID	Pvalue	OddsRatio	ExpCount	Count	Size	Term
Set1 ChIP	q1	MF	GO:0003735	6.95816e-42	70.2676	2.4941	39	252	structural constituent of ribosome
Set1 ChIP	q1	MF	GO:0005198	1.92363e-40	63.6923	2.70194	39	273	structural molecule activity
Set1 ChIP	q1	MF	GO:0043022	4.94616e-05	63.6367	0.0791778	3	8	ribosome binding
Set1 ChIP	q1	MF	GO:0043021	0.000382645	26.4796	0.148458	3	15	ribonucleoprotein complex binding
Set1 ChIP	q1	MF	GO:0019843	0.00698064	8.54661	0.395889	3	40	rRNA binding
Set1 ChIP	q1	MF	GO:0004807	0.00989722	Inf	0.00989722	1	1	triose-phosphate isomerase activity
Set1 ChIP	q1	MF	GO:0031420	0.00989722	Inf	0.00989722	1	1	alkali metal ion binding
Set1 ChIP	q1	MF	GO:0005080	0.00989722	Inf	0.00989722	1	1	protein kinase C binding
Set1 ChIP	q1	MF	GO:0030955	0.00989722	Inf	0.00989722	1	1	potassium ion binding
Set1 ChIP	q1	MF	GO:0004743	0.00989722	Inf	0.00989722	1	1	pyruvate kinase activity
Set1 ChIP	q1	MF	GO:0003746	0.0105515	14.8229	0.158356	2	16	translation elongation factor activity
Set1 ChIP	q1	MF	GO:0004634	0.0196984	101.98	0.0197944	1	2	phosphopyruvate hydratase activity
Set1 ChIP	q1	MF	GO:0019900	0.0294043	50.9804	0.0296917	1	3	kinase binding
Set1 ChIP	q1	MF	GO:0019901	0.0294043	50.9804	0.0296917	1	3	protein kinase binding
Set1 ChIP	q1	MF	GO:0004619	0.039016	33.9804	0.0395889	1	4	phosphoglycerate mutase activity
Set1 ChIP	q1	BP	GO:0006412	2.07591e-33	43.431	6.22563	44	624	translation
Set1 ChIP	q1	BP	GO:0044267	1.01011e-18	17.1307	14.4965	45	1453	cellular protein metabolic process
Set1 ChIP	q1	BP	GO:0009059	1.57002e-18	15.8063	13.7283	44	1376	macromolecule biosynthetic process
Set1 ChIP	q1	BP	GO:0034645	1.57002e-18	15.8063	13.7283	44	1376	cellular macromolecule biosynthetic process
Set1 ChIP	q1	BP	GO:0019538	3.15623e-18	16.4957	14.8856	45	1492	protein metabolic process
Set1 ChIP	q1	BP	GO:0010467	7.99592e-17	13.8324	15.0852	44	1512	gene expression
Set1 ChIP	q1	BP	GO:0009058	4.93269e-16	15.082	17.8089	46	1785	biosynthetic process
Set1 ChIP	q1	BP	GO:0044249	5.25892e-14	10.9331	17.6692	44	1771	cellular biosynthetic process
Set1 ChIP	q1	BP	GO:0044260	4.90805e-09	7.15514	24.8127	45	2487	cellular macromolecule metabolic process
Set1 ChIP	q1	BP	GO:0043170	8.89417e-09	6.947	25.1919	45	2525	macromolecule metabolic process
Set1 ChIP	q1	BP	GO:0044238	1.7078e-08	11.0926	31.1481	49	3122	primary metabolic process
Set1 ChIP	q1	BP	GO:0042254	3.84892e-08	7.09942	3.19263	16	320	ribosome biogenesis
Set1 ChIP	q1	BP	GO:0044237	1.29164e-07	9.86499	32.5848	49	3266	cellular metabolic process
Set1 ChIP	q1	BP	GO:0022613	1.7881e-07	6.28087	3.56178	16	357	ribonucleoprotein complex biogenesis
Set1 ChIP	q1	BP	GO:0008152	2.71541e-07	9.42461	33.1335	49	3321	metabolic process
Set1 ChIP	q1	BP	GO:0006096	1.9057e-05	32.9936	0.169609	4	17	glycolysis
Set1 ChIP	q1	BP	GO:0042274	5.64494e-05	23.8056	0.219493	4	22	ribosomal small subunit biogenesis
Set1 ChIP	q1	BP	GO:0044085	7.81154e-05	3.48199	6.97391	18	699	cellular component biogenesis
Set1 ChIP	q1	BP	GO:0045901	9.76446e-05	Inf	0.019954	2	2	positive regulation of translational elongation
Set1 ChIP	q1	BP	GO:0045905	9.76446e-05	Inf	0.019954	2	2	positive regulation of translational termination
Set1 ChIP	q1	BP	GO:0006452	9.76446e-05	Inf	0.019954	2	2	translational frameshifting
Set1 ChIP	q1	BP	GO:0043243	9.76446e-05	Inf	0.019954	2	2	positive regulation of protein complex disassembly
Set1 ChIP	q1	BP	GO:0006007	0.000174062	17.1167	0.289332	4	29	glucose catabolic process
Set1 ChIP	q1	BP	GO:0006448	0.000193448	35.0408	0.119724	3	12	regulation of translational elongation
Set1 ChIP	q1	BP	GO:0006449	0.000291059	206.36	0.0299309	2	3	regulation of translational termination
Set1 ChIP	q1	BP	GO:0019320	0.000327577	14.25	0.339217	4	34	hexose catabolic process
Set1 ChIP	q1	BP	GO:0046516	0.000578397	103.16	0.0399079	2	4	hypusine metabolic process
Set1 ChIP	q1	BP	GO:0008612	0.000578397	103.16	0.0399079	2	4	peptidyl-lysine modification to hypusine
Set1 ChIP	q1	BP	GO:0046365	0.000745408	11.2325	0.419033	4	42	monosaccharide catabolic process
Set1 ChIP	q1	BP	GO:0046164	0.00123991	9.68939	0.478895	4	48	alcohol catabolic process
Set1 ChIP	q1	BP	GO:0006006	0.00123991	9.68939	0.478895	4	48	glucose metabolic process
Set1 ChIP	q1	BP	GO:0009987	0.00146607	9.56617	43.8588	51	4396	cellular process
Set1 ChIP	q1	BP	GO:0006417	0.00192836	8.51667	0.538757	4	54	regulation of translation
Set1 ChIP	q1	BP	GO:0019318	0.00302281	7.46053	0.608596	4	61	hexose metabolic process
Set1 ChIP	q1	BP	GO:0045727	0.00336106	29.4457	0.0897928	2	9	positive regulation of translation
Set1 ChIP	q1	BP	GO:0000462	0.00336106	29.4457	0.0897928	2	9	maturation of SSU-rRNA from tricistronic rRNA transcript (SSU-rRNA, 5.8S rRNA, LSU-rRNA)
Set1 ChIP	q1	BP	GO:0006090	0.00345779	11.2216	0.309286	3	31	pyruvate metabolic process
Set1 ChIP	q1	BP	GO:0043244	0.00417458	25.76	0.0997698	2	10	regulation of protein complex disassembly
Set1 ChIP	q1	BP	GO:0000469	0.00417458	25.76	0.0997698	2	10	cleavage involved in rRNA processing
Set1 ChIP	q1	BP	GO:0010608	0.00523075	6.33458	0.708365	4	71	posttranscriptional regulation of gene expression
Set1 ChIP	q1	BP	GO:0016052	0.00577442	6.14855	0.728319	4	73	carbohydrate catabolic process
Set1 ChIP	q1	BP	GO:0006414	0.00633308	3.54337	2.23484	7	224	translational elongation
Set1 ChIP	q1	BP	GO:0006415	0.00709876	18.7236	0.129701	2	13	translational termination
Set1 ChIP	q1	BP	GO:0005996	0.00797235	5.57456	0.798158	4	80	monosaccharide metabolic process
Set1 ChIP	q1	BP	GO:0030490	0.00872852	7.83673	0.42901	3	43	maturation of SSU-rRNA
Set1 ChIP	q1	BP	GO:0006364	0.00990797	3.6087	1.85572	6	186	rRNA processing
Set1 ChIP	q1	BP	GO:0016072	0.010415	3.56761	1.87567	6	188	rRNA metabolic process
Set1 ChIP	q1	BP	GO:0018205	0.0120662	13.72	0.169609	2	17	peptidyl-lysine modification
Set1 ChIP	q1	BP	GO:0006094	0.0120662	13.72	0.169609	2	17	gluconeogenesis
Set1 ChIP	q1	BP	GO:0019319	0.0181646	10.8232	0.209517	2	21	hexose biosynthetic process
Set1 ChIP	q1	BP	GO:0032268	0.0285549	3.72198	1.16731	4	117	regulation of cellular protein metabolic process
Set1 ChIP	q1	BP	GO:0042255	0.0292302	8.216	0.269378	2	27	ribosome assembly
Set1 ChIP	q1	BP	GO:0051247	0.0292302	8.216	0.269378	2	27	positive regulation of protein metabolic process
Set1 ChIP	q1	BP	GO:0032270	0.0292302	8.216	0.269378	2	27	positive regulation of cellular protein metabolic process
Set1 ChIP	q1	BP	GO:0000461	0.0296389	50.5686	0.0299309	1	3	endonucleolytic cleavage to generate mature 3'-end of SSU-rRNA from (SSU-rRNA, 5.8S rRNA, LSU-rRNA)
Set1 ChIP	q1	BP	GO:0046364	0.0312807	7.89846	0.279355	2	28	monosaccharide biosynthetic process
Set1 ChIP	q1	BP	GO:0051246	0.033482	3.53011	1.22717	4	123	regulation of protein metabolic process
Set1 ChIP	q1	BP	GO:0051130	0.0377598	7.07724	0.309286	2	31	positive regulation of cellular component organization
Set1 ChIP	q1	BP	GO:0051083	0.0393258	33.7059	0.0399079	1	4	'de novo' cotranslational protein folding
Set1 ChIP	q1	BP	GO:0000478	0.0393258	33.7059	0.0399079	1	4	endonucleolytic cleavage involved in rRNA processing
Set1 ChIP	q1	BP	GO:0000479	0.0393258	33.7059	0.0399079	1	4	endonucleolytic cleavage of tricistronic rRNA transcript (SSU-rRNA, 5.8S rRNA, LSU-rRNA)
Set1 ChIP	q1	BP	GO:0000447	0.0393258	33.7059	0.0399079	1	4	endonucleolytic cleavage in ITS1 to separate SSU-rRNA from 5.8S rRNA and LSU-rRNA from tricistronic rRNA transcript (SSU-rRNA, 5.8S rRNA, LSU-rRNA)
Set1 ChIP	q1	BP	GO:0006091	0.041757	3.27604	1.31696	4	132	generation of precursor metabolites and energy
Set1 ChIP	q1	BP	GO:0034470	0.0460604	2.47826	2.63392	6	264	ncRNA processing
Set1 ChIP	q1	BP	GO:0000056	0.0489178	25.2745	0.0498849	1	5	ribosomal small subunit export from nucleus
Set1 ChIP	q1	BP	GO:0042026	0.0489178	25.2745	0.0498849	1	5	protein refolding
Set1 ChIP	q1	CC	GO:0022626	4.59714e-51	125.684	1.88821	41	191	cytosolic ribosome
Set1 ChIP	q1	CC	GO:0044445	7.1045e-51	122.972	2.11559	42	214	cytosolic part
Set1 ChIP	q1	CC	GO:0005840	6.19999e-44	78.8754	2.72852	41	276	ribosome
Set1 ChIP	q1	CC	GO:0030529	9.2176e-33	38.1082	4.9924	41	505	ribonucleoprotein complex
Set1 ChIP	q1	CC	GO:0022625	2.42009e-29	69.2151	0.810646	23	82	cytosolic large ribosomal subunit
Set1 ChIP	q1	CC	GO:0015934	1.09624e-24	39.7018	1.23574	23	125	large ribosomal subunit
Set1 ChIP	q1	CC	GO:0022627	6.23176e-18	44.517	0.612928	15	62	cytosolic small ribosomal subunit
Set1 ChIP	q1	CC	GO:0043228	6.84253e-18	13.6998	12.4958	42	1264	non-membrane-bounded organelle
Set1 ChIP	q1	CC	GO:0043232	6.84253e-18	13.6998	12.4958	42	1264	intracellular non-membrane-bounded organelle
Set1 ChIP	q1	CC	GO:0015935	5.0236e-15	26.3206	0.929278	15	94	small ribosomal subunit
Set1 ChIP	q1	CC	GO:0005829	7.42346e-15	21.5065	22.708	49	2297	cytosol
Set1 ChIP	q1	CC	GO:0032991	2.60324e-13	9.74801	17.3597	43	1756	macromolecular complex
Set1 ChIP	q1	CC	GO:0044446	8.73339e-07	4.38565	22.6289	40	2289	intracellular organelle part
Set1 ChIP	q1	CC	GO:0044422	8.85459e-07	4.38222	22.6388	40	2290	organelle part
Set1 ChIP	q1	CC	GO:0044444	1.29335e-05	9.45356	37.8532	50	3829	cytoplasmic part
Set1 ChIP	q1	CC	GO:0005737	0.000127004	12.8327	41.6395	51	4212	cytoplasm
Set1 ChIP	q1	CC	GO:0005730	0.0018272	3.43054	3.4403	10	348	nucleolus
Set1 ChIP	q1	CC	GO:0043226	0.0165911	2.9262	41.8669	48	4235	organelle
Set1 ChIP	q1	CC	GO:0043229	0.0165911	2.9262	41.8669	48	4235	intracellular organelle
Set1 ChIP	q1	CC	GO:0000015	0.019676	102.098	0.0197719	1	2	phosphopyruvate hydratase complex
Set1 ChIP	q1	CC	GO:0044424	0.0245946	Inf	48.4411	52	4900	intracellular part
Set1 ChIP	q1	CC	GO:0005622	0.0245946	Inf	48.4411	52	4900	intracellular
Set1 ChIP	q2	MF	GO:0003735	2.52904e-41	65.2354	2.54206	39	252	structural constituent of ribosome
Set1 ChIP	q2	MF	GO:0005198	6.96305e-40	59.131	2.7539	39	273	structural molecule activity
Set1 ChIP	q2	MF	GO:0019843	3.72363e-09	28.7167	0.403502	8	40	rRNA binding
Set1 ChIP	q2	MF	GO:0008097	9.98577e-05	Inf	0.0201751	2	2	5S rRNA binding
Set1 ChIP	q2	MF	GO:0004455	0.0100876	Inf	0.0100876	1	1	ketol-acid reductoisomerase activity
Set1 ChIP	q2	MF	GO:0045155	0.0100876	Inf	0.0100876	1	1	electron transporter, transferring electrons from CoQH2-cytochrome c reductase complex and cytochrome c oxidase complex activity
Set1 ChIP	q2	MF	GO:0003746	0.0109458	14.5294	0.161401	2	16	translation elongation factor activity
Set1 ChIP	q2	MF	GO:0008135	0.0221422	5.41474	0.605253	3	60	translation factor activity, nucleic acid binding
Set1 ChIP	q2	MF	GO:0045182	0.0251598	5.141	0.635516	3	63	translation regulator activity
Set1 ChIP	q2	MF	GO:0008553	0.0299641	49.9904	0.0302627	1	3	hydrogen-exporting ATPase activity, phosphorylative mechanism
Set1 ChIP	q2	MF	GO:0003723	0.0469079	1.99495	5.57842	10	553	RNA binding
Set1 ChIP	q2	BP	GO:0006412	3.22474e-28	26.8176	6.34536	41	624	translation
Set1 ChIP	q2	BP	GO:0044267	1.75433e-20	20.9093	14.7753	47	1453	cellular protein metabolic process
Set1 ChIP	q2	BP	GO:0019538	5.84793e-20	20.1336	15.1719	47	1492	protein metabolic process
Set1 ChIP	q2	BP	GO:0009059	8.82519e-17	12.3419	13.9923	43	1376	macromolecule biosynthetic process
Set1 ChIP	q2	BP	GO:0034645	8.82519e-17	12.3419	13.9923	43	1376	cellular macromolecule biosynthetic process
Set1 ChIP	q2	BP	GO:0010467	3.80439e-15	10.8012	15.3753	43	1512	gene expression
Set1 ChIP	q2	BP	GO:0044249	2.08559e-13	9.7155	18.009	44	1771	cellular biosynthetic process
Set1 ChIP	q2	BP	GO:0009058	2.85868e-13	9.59806	18.1514	44	1785	biosynthetic process
Set1 ChIP	q2	BP	GO:0042254	9.84171e-13	10.6668	3.25403	21	320	ribosome biogenesis
Set1 ChIP	q2	BP	GO:0022613	8.34617e-12	9.41992	3.63028	21	357	ribonucleoprotein complex biogenesis
Set1 ChIP	q2	BP	GO:0044260	3.81939e-11	10.706	25.2899	48	2487	cellular macromolecule metabolic process
Set1 ChIP	q2	BP	GO:0043170	7.44459e-11	10.3945	25.6763	48	2525	macromolecule metabolic process
Set1 ChIP	q2	BP	GO:0044237	4.92386e-10	31.4686	33.2114	52	3266	cellular metabolic process
Set1 ChIP	q2	BP	GO:0044238	9.02802e-10	17.3377	31.7471	51	3122	primary metabolic process
Set1 ChIP	q2	BP	GO:0008152	1.14963e-09	30.0642	33.7707	52	3321	metabolic process
Set1 ChIP	q2	BP	GO:0044085	7.14298e-08	5.08427	7.10802	23	699	cellular component biogenesis
Set1 ChIP	q2	BP	GO:0000462	1.15683e-06	84.1469	0.0915196	4	9	maturation of SSU-rRNA from tricistronic rRNA transcript (SSU-rRNA, 5.8S rRNA, LSU-rRNA)
Set1 ChIP	q2	BP	GO:0030490	0.000877176	10.7169	0.43726	4	43	maturation of SSU-rRNA
Set1 ChIP	q2	BP	GO:0009987	0.00125602	9.75599	44.7022	52	4396	cellular process
Set1 ChIP	q2	BP	GO:0042274	0.00133404	16.2316	0.223715	3	22	ribosomal small subunit biogenesis
Set1 ChIP	q2	BP	GO:0000028	0.00206241	40.4235	0.0711819	2	7	ribosomal small subunit assembly
Set1 ChIP	q2	BP	GO:0042255	0.00244455	12.8375	0.274559	3	27	ribosome assembly
Set1 ChIP	q2	BP	GO:0031291	0.00433384	25.25	0.101688	2	10	Ran protein signal transduction
Set1 ChIP	q2	BP	GO:0051169	0.00635985	4.69401	1.18975	5	117	nuclear transport
Set1 ChIP	q2	BP	GO:0006913	0.00635985	4.69401	1.18975	5	117	nucleocytoplasmic transport
Set1 ChIP	q2	BP	GO:0006407	0.00736677	18.3529	0.132195	2	13	rRNA export from nucleus
Set1 ChIP	q2	BP	GO:0051029	0.00736677	18.3529	0.132195	2	13	rRNA transport
Set1 ChIP	q2	BP	GO:0000209	0.0101688	Inf	0.0101688	1	1	protein polyubiquitination
Set1 ChIP	q2	BP	GO:0051168	0.0132729	4.75909	0.925365	4	91	nuclear export
Set1 ChIP	q2	BP	GO:0006414	0.0250339	2.89342	2.27782	6	224	translational elongation
Set1 ChIP	q2	BP	GO:0022618	0.0256855	5.099	0.640637	3	63	ribonucleoprotein complex assembly
Set1 ChIP	q2	BP	GO:0000461	0.0302031	49.5865	0.0305065	1	3	endonucleolytic cleavage to generate mature 3'-end of SSU-rRNA from (SSU-rRNA, 5.8S rRNA, LSU-rRNA)
Set1 ChIP	q2	BP	GO:0033750	0.0324008	7.74208	0.284728	2	28	ribosome localization
Set1 ChIP	q2	BP	GO:0033753	0.0324008	7.74208	0.284728	2	28	establishment of ribosome localization
Set1 ChIP	q2	BP	GO:0000054	0.0324008	7.74208	0.284728	2	28	ribosomal subunit export from nucleus
Set1 ChIP	q2	BP	GO:0006364	0.0394748	2.86487	1.8914	5	186	rRNA processing
Set1 ChIP	q2	BP	GO:0009099	0.0400705	33.0513	0.0406754	1	4	valine biosynthetic process
Set1 ChIP	q2	BP	GO:0000478	0.0400705	33.0513	0.0406754	1	4	endonucleolytic cleavage involved in rRNA processing
Set1 ChIP	q2	BP	GO:0000479	0.0400705	33.0513	0.0406754	1	4	endonucleolytic cleavage of tricistronic rRNA transcript (SSU-rRNA, 5.8S rRNA, LSU-rRNA)
Set1 ChIP	q2	BP	GO:0000447	0.0400705	33.0513	0.0406754	1	4	endonucleolytic cleavage in ITS1 to separate SSU-rRNA from 5.8S rRNA and LSU-rRNA from tricistronic rRNA transcript (SSU-rRNA, 5.8S rRNA, LSU-rRNA)
Set1 ChIP	q2	BP	GO:0016072	0.041042	2.83242	1.91174	5	188	rRNA metabolic process
Set1 ChIP	q2	BP	GO:0000056	0.0498394	24.7837	0.0508442	1	5	ribosomal small subunit export from nucleus
Set1 ChIP	q2	CC	GO:0022626	1.98495e-46	92.6433	1.92452	39	191	cytosolic ribosome
Set1 ChIP	q2	CC	GO:0044445	2.53881e-44	80.1012	2.15627	39	214	cytosolic part
Set1 ChIP	q2	CC	GO:0005840	1.04572e-39	58.4177	2.78099	39	276	ribosome
Set1 ChIP	q2	CC	GO:0030529	3.49984e-29	28.3414	5.0884	39	505	ribonucleoprotein complex
Set1 ChIP	q2	CC	GO:0022627	1.77035e-28	82.6875	0.624715	21	62	cytosolic small ribosomal subunit
Set1 ChIP	q2	CC	GO:0015935	3.7896e-24	46.1533	0.947148	21	94	small ribosomal subunit
Set1 ChIP	q2	CC	GO:0022625	6.9166e-19	37.3564	0.826236	17	82	cytosolic large ribosomal subunit
Set1 ChIP	q2	CC	GO:0043228	2.54261e-17	12.4513	12.7361	42	1264	non-membrane-bounded organelle
Set1 ChIP	q2	CC	GO:0043232	2.54261e-17	12.4513	12.7361	42	1264	intracellular non-membrane-bounded organelle
Set1 ChIP	q2	CC	GO:0015934	1.28434e-15	22.295	1.25951	17	125	large ribosomal subunit
Set1 ChIP	q2	CC	GO:0005829	7.45298e-13	12.6264	23.1447	48	2297	cytosol
Set1 ChIP	q2	CC	GO:0032991	9.37305e-13	8.77069	17.6935	43	1756	macromolecular complex
Set1 ChIP	q2	CC	GO:0044446	1.02272e-07	5.02974	23.0641	42	2289	intracellular organelle part
Set1 ChIP	q2	CC	GO:0044422	1.03815e-07	5.0258	23.0741	42	2290	organelle part
Set1 ChIP	q2	CC	GO:0044444	9.73321e-06	9.64518	38.5812	51	3829	cytoplasmic part
Set1 ChIP	q2	CC	GO:0005737	0.000103282	13.0875	42.4403	52	4212	cytoplasm
Set1 ChIP	q2	CC	GO:0043226	0.00423389	4.07009	42.6721	50	4235	organelle
Set1 ChIP	q2	CC	GO:0043229	0.00423389	4.07009	42.6721	50	4235	intracellular organelle
Set1 ChIP	q2	CC	GO:0005730	0.0218858	2.54484	3.50646	8	348	nucleolus
Set1 ChIP	q2	CC	GO:0044424	0.0228945	Inf	49.3726	53	4900	intracellular part
Set1 ChIP	q2	CC	GO:0005622	0.0228945	Inf	49.3726	53	4900	intracellular
Set1 ChIP	q2	CC	GO:0016281	0.0299302	50.0481	0.0302281	1	3	eukaryotic translation initiation factor 4F complex
Set1 ChIP	q2	CC	GO:0005853	0.0493935	25.0144	0.0503802	1	5	eukaryotic translation elongation factor 1 complex
Set1 ChIP	q2	CC	GO:0005884	0.0493935	25.0144	0.0503802	1	5	actin filament
Set1 ChIP	q3	MF	GO:0003735	3.19287e-25	26.9735	2.54206	29	252	structural constituent of ribosome
Set1 ChIP	q3	MF	GO:0005198	3.37281e-24	24.548	2.7539	29	273	structural molecule activity
Set1 ChIP	q3	MF	GO:0019843	2.32763e-06	19.4005	0.403502	6	40	rRNA binding
Set1 ChIP	q3	MF	GO:0004802	0.0100876	Inf	0.0100876	1	1	transketolase activity
Set1 ChIP	q3	MF	GO:0003871	0.0100876	Inf	0.0100876	1	1	5-methyltetrahydropteroyltriglutamate-homocysteine S-methyltransferase activity
Set1 ChIP	q3	MF	GO:0004478	0.0100876	Inf	0.0100876	1	1	methionine adenosyltransferase activity
Set1 ChIP	q3	MF	GO:0033592	0.0100876	Inf	0.0100876	1	1	RNA strand annealing activity
Set1 ChIP	q3	MF	GO:0042085	0.0100876	Inf	0.0100876	1	1	5-methyltetrahydropteroyltri-L-glutamate-dependent methyltransferase activity
Set1 ChIP	q3	MF	GO:0043531	0.0100876	Inf	0.0100876	1	1	ADP binding
Set1 ChIP	q3	MF	GO:0004768	0.0100876	Inf	0.0100876	1	1	stearoyl-CoA 9-desaturase activity
Set1 ChIP	q3	MF	GO:0005471	0.0100876	Inf	0.0100876	1	1	ATP:ADP antiporter activity
Set1 ChIP	q3	MF	GO:0004427	0.0200752	100	0.0201751	1	2	inorganic diphosphatase activity
Set1 ChIP	q3	MF	GO:0003725	0.0299641	49.9904	0.0302627	1	3	double-stranded RNA binding
Set1 ChIP	q3	MF	GO:0008553	0.0299641	49.9904	0.0302627	1	3	hydrogen-exporting ATPase activity, phosphorylative mechanism
Set1 ChIP	q3	MF	GO:0019904	0.0299641	49.9904	0.0302627	1	3	protein domain specific binding
Set1 ChIP	q3	MF	GO:0008172	0.0299641	49.9904	0.0302627	1	3	S-methyltransferase activity
Set1 ChIP	q3	MF	GO:0004864	0.0397549	33.3205	0.0403502	1	4	protein phosphatase inhibitor activity
Set1 ChIP	q3	MF	GO:0042123	0.0397549	33.3205	0.0403502	1	4	glucanosyltransferase activity
Set1 ChIP	q3	MF	GO:0042124	0.0397549	33.3205	0.0403502	1	4	1,3-beta-glucanosyltransferase activity
Set1 ChIP	q3	MF	GO:0016721	0.0397549	33.3205	0.0403502	1	4	oxidoreductase activity, acting on superoxide radicals as acceptor
Set1 ChIP	q3	MF	GO:0016717	0.0397549	33.3205	0.0403502	1	4	oxidoreductase activity, acting on paired donors, with oxidation of a pair of donors resulting in the reduction of molecular oxygen to two molecules of water
Set1 ChIP	q3	MF	GO:0016744	0.0397549	33.3205	0.0403502	1	4	transferase activity, transferring aldehyde or ketonic groups
Set1 ChIP	q3	MF	GO:0019212	0.0397549	33.3205	0.0403502	1	4	phosphatase inhibitor activity
Set1 ChIP	q3	MF	GO:0004784	0.0397549	33.3205	0.0403502	1	4	superoxide dismutase activity
Set1 ChIP	q3	MF	GO:0043167	0.0485611	2.05414	4.84203	9	480	ion binding
Set1 ChIP	q3	MF	GO:0043169	0.0485611	2.05414	4.84203	9	480	cation binding
Set1 ChIP	q3	BP	GO:0006412	4.73053e-16	10.8498	6.34536	31	624	translation
Set1 ChIP	q3	BP	GO:0044267	3.48511e-08	4.71644	14.7753	34	1453	cellular protein metabolic process
Set1 ChIP	q3	BP	GO:0009059	3.81144e-08	4.68831	13.9923	33	1376	macromolecule biosynthetic process
Set1 ChIP	q3	BP	GO:0034645	3.81144e-08	4.68831	13.9923	33	1376	cellular macromolecule biosynthetic process
Set1 ChIP	q3	BP	GO:0019538	7.17192e-08	4.54242	15.1719	34	1492	protein metabolic process
Set1 ChIP	q3	BP	GO:0044249	4.18812e-07	4.17915	18.009	36	1771	cellular biosynthetic process
Set1 ChIP	q3	BP	GO:0009058	5.22035e-07	4.12875	18.1514	36	1785	biosynthetic process
Set1 ChIP	q3	BP	GO:0010467	1.78193e-06	3.7879	15.3753	32	1512	gene expression
Set1 ChIP	q3	BP	GO:0044237	8.79864e-05	3.95714	33.2114	46	3266	cellular metabolic process
Set1 ChIP	q3	BP	GO:0008152	0.000158116	3.78033	33.7707	46	3321	metabolic process
Set1 ChIP	q3	BP	GO:0044238	0.000251664	3.30532	31.7471	44	3122	primary metabolic process
Set1 ChIP	q3	BP	GO:0044260	0.000894223	2.55696	25.2899	37	2487	cellular macromolecule metabolic process
Set1 ChIP	q3	BP	GO:0043170	0.00127648	2.48259	25.6763	37	2525	macromolecule metabolic process
Set1 ChIP	q3	BP	GO:0045740	0.0101688	Inf	0.0101688	1	1	positive regulation of DNA replication
Set1 ChIP	q3	BP	GO:0032212	0.0101688	Inf	0.0101688	1	1	positive regulation of telomere maintenance via telomerase
Set1 ChIP	q3	BP	GO:0032206	0.0202362	99.1923	0.0203377	1	2	positive regulation of telomere maintenance
Set1 ChIP	q3	BP	GO:0032846	0.0202362	99.1923	0.0203377	1	2	positive regulation of homeostatic process
Set1 ChIP	q3	BP	GO:0033559	0.0202362	99.1923	0.0203377	1	2	unsaturated fatty acid metabolic process
Set1 ChIP	q3	BP	GO:0006636	0.0202362	99.1923	0.0203377	1	2	unsaturated fatty acid biosynthetic process
Set1 ChIP	q3	BP	GO:0032210	0.0202362	99.1923	0.0203377	1	2	regulation of telomere maintenance via telomerase
Set1 ChIP	q3	BP	GO:0009987	0.024546	3.11781	44.7022	50	4396	cellular process
Set1 ChIP	q3	BP	GO:0046084	0.0302031	49.5865	0.0305065	1	3	adenine biosynthetic process
Set1 ChIP	q3	BP	GO:0001320	0.0302031	49.5865	0.0305065	1	3	age-dependent response to reactive oxygen species involved in chronological cell aging
Set1 ChIP	q3	BP	GO:0001323	0.0302031	49.5865	0.0305065	1	3	age-dependent general metabolic decline involved in chronological cell aging
Set1 ChIP	q3	BP	GO:0001324	0.0302031	49.5865	0.0305065	1	3	age-dependent response to oxidative stress involved in chronological cell aging
Set1 ChIP	q3	BP	GO:0001306	0.0302031	49.5865	0.0305065	1	3	age-dependent response to oxidative stress
Set1 ChIP	q3	BP	GO:0007571	0.0302031	49.5865	0.0305065	1	3	age-dependent general metabolic decline
Set1 ChIP	q3	BP	GO:0006555	0.0324008	7.74208	0.284728	2	28	methionine metabolic process
Set1 ChIP	q3	BP	GO:0009069	0.0345779	7.45389	0.294896	2	29	serine family amino acid metabolic process
Set1 ChIP	q3	BP	GO:0051130	0.0390974	6.93712	0.315234	2	31	positive regulation of cellular component organization
Set1 ChIP	q3	BP	GO:0009052	0.0400705	33.0513	0.0406754	1	4	pentose-phosphate shunt, non-oxidative branch
Set1 ChIP	q3	BP	GO:0051054	0.0400705	33.0513	0.0406754	1	4	positive regulation of DNA metabolic process
Set1 ChIP	q3	BP	GO:0051083	0.0400705	33.0513	0.0406754	1	4	'de novo' cotranslational protein folding
Set1 ChIP	q3	BP	GO:0001315	0.0400705	33.0513	0.0406754	1	4	age-dependent response to reactive oxygen species
Set1 ChIP	q3	BP	GO:0000096	0.048762	6.0915	0.355909	2	35	sulfur amino acid metabolic process
Set1 ChIP	q3	BP	GO:0032204	0.0498394	24.7837	0.0508442	1	5	regulation of telomere maintenance
Set1 ChIP	q3	BP	GO:0031565	0.0498394	24.7837	0.0508442	1	5	cytokinesis checkpoint
Set1 ChIP	q3	BP	GO:0032844	0.0498394	24.7837	0.0508442	1	5	regulation of homeostatic process
Set1 ChIP	q3	BP	GO:0046083	0.0498394	24.7837	0.0508442	1	5	adenine metabolic process
Set1 ChIP	q3	BP	GO:0051038	0.0498394	24.7837	0.0508442	1	5	negative regulation of transcription during meiosis
Set1 ChIP	q3	CC	GO:0022626	7.52394e-29	37.6299	1.92452	29	191	cytosolic ribosome
Set1 ChIP	q3	CC	GO:0044445	2.3568e-27	32.8014	2.15627	29	214	cytosolic part
Set1 ChIP	q3	CC	GO:0005840	6.55393e-27	28.5384	2.78099	31	276	ribosome
Set1 ChIP	q3	CC	GO:0022625	8.28728e-24	50.2933	0.826236	20	82	cytosolic large ribosomal subunit
Set1 ChIP	q3	CC	GO:0030529	5.0496e-20	15.251	5.0884	32	505	ribonucleoprotein complex
Set1 ChIP	q3	CC	GO:0015934	7.34742e-20	29.4488	1.25951	20	125	large ribosomal subunit
Set1 ChIP	q3	CC	GO:0043228	3.0214e-09	5.32933	12.7361	33	1264	non-membrane-bounded organelle
Set1 ChIP	q3	CC	GO:0043232	3.0214e-09	5.32933	12.7361	33	1264	intracellular non-membrane-bounded organelle
Set1 ChIP	q3	CC	GO:0022627	7.12793e-09	19.8911	0.624715	9	62	cytosolic small ribosomal subunit
Set1 ChIP	q3	CC	GO:0015935	2.92881e-07	12.3257	0.947148	9	94	small ribosomal subunit
Set1 ChIP	q3	CC	GO:0005829	2.30496e-06	4.02168	23.1447	40	2297	cytosol
Set1 ChIP	q3	CC	GO:0032991	4.06072e-06	3.62155	17.6935	34	1756	macromolecular complex
Set1 ChIP	q3	CC	GO:0044446	0.000272818	2.77653	23.0641	36	2289	intracellular organelle part
Set1 ChIP	q3	CC	GO:0044422	0.000275692	2.77436	23.0741	36	2290	organelle part
Set1 ChIP	q3	CC	GO:0044444	0.000333256	4.62454	38.5812	49	3829	cytoplasmic part
Set1 ChIP	q3	CC	GO:0009986	0.000530512	6.72516	1.03783	6	103	cell surface
Set1 ChIP	q3	CC	GO:0005618	0.00313676	7.37558	0.614639	4	61	cell wall
Set1 ChIP	q3	CC	GO:0030312	0.00313676	7.37558	0.614639	4	61	external encapsulating structure
Set1 ChIP	q3	CC	GO:0005737	0.00341762	4.18469	42.4403	50	4212	cytoplasm
Set1 ChIP	q3	CC	GO:0009277	0.0084065	7.95077	0.423194	3	42	fungal-type cell wall
Set1 ChIP	q3	CC	GO:0043614	0.010076	Inf	0.010076	1	1	multi-eIF complex
Set1 ChIP	q3	CC	GO:0005754	0.0200525	100.115	0.0201521	1	2	mitochondrial proton-transporting ATP synthase, catalytic core
Set1 ChIP	q3	CC	GO:0016363	0.0200525	100.115	0.0201521	1	2	nuclear matrix
Set1 ChIP	q3	CC	GO:0005850	0.0200525	100.115	0.0201521	1	2	eukaryotic translation initiation factor 2 complex
Set1 ChIP	q3	CC	GO:0005854	0.0200525	100.115	0.0201521	1	2	nascent polypeptide-associated complex
Set1 ChIP	q3	CC	GO:0042788	0.0200525	100.115	0.0201521	1	2	polysomal ribosome
Set1 ChIP	q3	CC	GO:0000936	0.0200525	100.115	0.0201521	1	2	primary cell septum
Set1 ChIP	q3	CC	GO:0045267	0.0200525	100.115	0.0201521	1	2	proton-transporting ATP synthase, catalytic core
Set1 ChIP	q3	CC	GO:0005730	0.0218858	2.54484	3.50646	8	348	nucleolus
Set1 ChIP	q3	CC	GO:0044462	0.023865	9.24242	0.241825	2	24	external encapsulating structure part
Set1 ChIP	q3	CC	GO:0044426	0.023865	9.24242	0.241825	2	24	cell wall part
Set1 ChIP	q3	CC	GO:0005844	0.0299302	50.0481	0.0302281	1	3	polysome
Set1 ChIP	q3	CC	GO:0043188	0.0299302	50.0481	0.0302281	1	3	cell septum edging
Set1 ChIP	q3	CC	GO:0009897	0.0479688	6.14854	0.352662	2	35	external side of plasma membrane
Set1 ChIP	q3	CC	GO:0000275	0.0493935	25.0144	0.0503802	1	5	mitochondrial proton-transporting ATP synthase complex, catalytic core F(1)
Set1 ChIP	q3	CC	GO:0045261	0.0493935	25.0144	0.0503802	1	5	proton-transporting ATP synthase complex, catalytic core F(1)
Set1 ChIP	q4	MF	GO:0003743	0.000476501	12.7842	0.373239	4	37	translation initiation factor activity
Set1 ChIP	q4	MF	GO:0016709	0.000591417	101.941	0.0403502	2	4	oxidoreductase activity, acting on paired donors, with incorporation or reduction of molecular oxygen, NADH or NADPH as one donor, and incorporation of one atom of oxygen
Set1 ChIP	q4	MF	GO:0043565	0.00245588	7.92915	0.57499	4	57	sequence-specific DNA binding
Set1 ChIP	q4	MF	GO:0008135	0.00296498	7.5	0.605253	4	60	translation factor activity, nucleic acid binding
Set1 ChIP	q4	MF	GO:0004497	0.00343542	29.098	0.090788	2	9	monooxygenase activity
Set1 ChIP	q4	MF	GO:0045182	0.00354211	7.11449	0.635516	4	63	translation regulator activity
Set1 ChIP	q4	MF	GO:0005506	0.00465177	10.0065	0.342977	3	34	iron ion binding
Set1 ChIP	q4	MF	GO:0016491	0.00540656	3.32458	2.74381	8	272	oxidoreductase activity
Set1 ChIP	q4	MF	GO:0003676	0.00788416	2.2149	9.39151	17	931	nucleic acid binding
Set1 ChIP	q4	MF	GO:0004029	0.0100876	Inf	0.0100876	1	1	aldehyde dehydrogenase (NAD) activity
Set1 ChIP	q4	MF	GO:0004013	0.0100876	Inf	0.0100876	1	1	adenosylhomocysteinase activity
Set1 ChIP	q4	MF	GO:0004030	0.0100876	Inf	0.0100876	1	1	aldehyde dehydrogenase [NAD(P)+] activity
Set1 ChIP	q4	MF	GO:0004617	0.0100876	Inf	0.0100876	1	1	phosphoglycerate dehydrogenase activity
Set1 ChIP	q4	MF	GO:0015140	0.0100876	Inf	0.0100876	1	1	malate transmembrane transporter activity
Set1 ChIP	q4	MF	GO:0015141	0.0100876	Inf	0.0100876	1	1	succinate transmembrane transporter activity
Set1 ChIP	q4	MF	GO:0042936	0.0100876	Inf	0.0100876	1	1	dipeptide transporter activity
Set1 ChIP	q4	MF	GO:0042937	0.0100876	Inf	0.0100876	1	1	tripeptide transporter activity
Set1 ChIP	q4	MF	GO:0000254	0.0100876	Inf	0.0100876	1	1	C-4 methylsterol oxidase activity
Set1 ChIP	q4	MF	GO:0004410	0.0100876	Inf	0.0100876	1	1	homocitrate synthase activity
Set1 ChIP	q4	MF	GO:0008398	0.0100876	Inf	0.0100876	1	1	sterol 14-demethylase activity
Set1 ChIP	q4	MF	GO:0004152	0.0100876	Inf	0.0100876	1	1	dihydroorotate dehydrogenase activity
Set1 ChIP	q4	MF	GO:0004158	0.0100876	Inf	0.0100876	1	1	dihydroorotate oxidase activity
Set1 ChIP	q4	MF	GO:0016802	0.0100876	Inf	0.0100876	1	1	trialkylsulfonium hydrolase activity
Set1 ChIP	q4	MF	GO:0008301	0.0100876	Inf	0.0100876	1	1	DNA binding, bending
Set1 ChIP	q4	MF	GO:0003938	0.0100876	Inf	0.0100876	1	1	IMP dehydrogenase activity
Set1 ChIP	q4	MF	GO:0004793	0.0100876	Inf	0.0100876	1	1	threonine aldolase activity
Set1 ChIP	q4	MF	GO:0004754	0.0100876	Inf	0.0100876	1	1	saccharopine dehydrogenase (NAD+, L-lysine-forming) activity
Set1 ChIP	q4	MF	GO:0016705	0.0137776	12.7083	0.181576	2	18	oxidoreductase activity, acting on paired donors, with incorporation or reduction of molecular oxygen
Set1 ChIP	q4	MF	GO:0051082	0.0175826	5.94115	0.554815	3	55	unfolded protein binding
Set1 ChIP	q4	MF	GO:0004066	0.0200752	100	0.0201751	1	2	asparagine synthase (glutamine-hydrolyzing) activity
Set1 ChIP	q4	MF	GO:0003984	0.0200752	100	0.0201751	1	2	acetolactate synthase activity
Set1 ChIP	q4	MF	GO:0016801	0.0200752	100	0.0201751	1	2	hydrolase activity, acting on ether bonds
Set1 ChIP	q4	MF	GO:0005310	0.0200752	100	0.0201751	1	2	dicarboxylic acid transmembrane transporter activity
Set1 ChIP	q4	MF	GO:0004753	0.0200752	100	0.0201751	1	2	saccharopine dehydrogenase activity
Set1 ChIP	q4	MF	GO:0003677	0.0216814	2.54972	3.50038	8	347	DNA binding
Set1 ChIP	q4	MF	GO:0003697	0.0258296	8.82864	0.252189	2	25	single-stranded DNA binding
Set1 ChIP	q4	MF	GO:0015197	0.0299641	49.9904	0.0302627	1	3	peptide transporter activity
Set1 ChIP	q4	MF	GO:0015198	0.0299641	49.9904	0.0302627	1	3	oligopeptide transporter activity
Set1 ChIP	q4	MF	GO:0043110	0.0299641	49.9904	0.0302627	1	3	rDNA spacer replication fork barrier binding
Set1 ChIP	q4	MF	GO:0016634	0.0299641	49.9904	0.0302627	1	3	oxidoreductase activity, acting on the CH-CH group of donors, oxygen as acceptor
Set1 ChIP	q4	MF	GO:0031634	0.0299641	49.9904	0.0302627	1	3	replication fork barrier binding
Set1 ChIP	q4	MF	GO:0019207	0.0385322	6.99391	0.312714	2	31	kinase regulator activity
Set1 ChIP	q4	MF	GO:0019887	0.0385322	6.99391	0.312714	2	31	protein kinase regulator activity
Set1 ChIP	q4	MF	GO:0004602	0.0397549	33.3205	0.0403502	1	4	glutathione peroxidase activity
Set1 ChIP	q4	MF	GO:0042123	0.0397549	33.3205	0.0403502	1	4	glucanosyltransferase activity
Set1 ChIP	q4	MF	GO:0042124	0.0397549	33.3205	0.0403502	1	4	1,3-beta-glucanosyltransferase activity
Set1 ChIP	q4	MF	GO:0016744	0.0397549	33.3205	0.0403502	1	4	transferase activity, transferring aldehyde or ketonic groups
Set1 ChIP	q4	MF	GO:0034513	0.0397549	33.3205	0.0403502	1	4	box H/ACA snoRNA binding
Set1 ChIP	q4	MF	GO:0016832	0.0397549	33.3205	0.0403502	1	4	aldehyde-lyase activity
Set1 ChIP	q4	MF	GO:0003713	0.0494488	24.9856	0.0504378	1	5	transcription coactivator activity
Set1 ChIP	q4	MF	GO:0004860	0.0494488	24.9856	0.0504378	1	5	protein kinase inhibitor activity
Set1 ChIP	q4	MF	GO:0015114	0.0494488	24.9856	0.0504378	1	5	phosphate ion transmembrane transporter activity
Set1 ChIP	q4	MF	GO:0019210	0.0494488	24.9856	0.0504378	1	5	kinase inhibitor activity
Set1 ChIP	q4	MF	GO:0005315	0.0494488	24.9856	0.0504378	1	5	inorganic phosphate transmembrane transporter activity
Set1 ChIP	q4	BP	GO:0009066	0.000101199	12.6408	0.47947	5	49	aspartate family amino acid metabolic process
Set1 ChIP	q4	BP	GO:0030433	0.000140052	18.2163	0.273983	4	28	ER-associated protein catabolic process
Set1 ChIP	q4	BP	GO:0006515	0.000269978	15.0609	0.322909	4	33	misfolded or incompletely synthesized protein catabolic process
Set1 ChIP	q4	BP	GO:0019878	0.000279901	210.612	0.0293553	2	3	lysine biosynthetic process via aminoadipic acid
Set1 ChIP	q4	BP	GO:0016053	0.000285939	6.30601	1.3112	7	134	organic acid biosynthetic process
Set1 ChIP	q4	BP	GO:0046394	0.000285939	6.30601	1.3112	7	134	carboxylic acid biosynthetic process
Set1 ChIP	q4	BP	GO:0009408	0.000340508	14.0837	0.342479	4	35	response to heat
Set1 ChIP	q4	BP	GO:0034605	0.000340508	14.0837	0.342479	4	35	cellular response to heat
Set1 ChIP	q4	BP	GO:0009266	0.000380319	13.641	0.352264	4	36	response to temperature stimulus
Set1 ChIP	q4	BP	GO:0008652	0.000474906	6.88844	1.01765	6	104	cellular amino acid biosynthetic process
Set1 ChIP	q4	BP	GO:0044271	0.000836603	5.20737	1.56562	7	160	cellular nitrogen compound biosynthetic process
Set1 ChIP	q4	BP	GO:0009309	0.000849417	6.12242	1.13507	6	116	amine biosynthetic process
Set1 ChIP	q4	BP	GO:0006413	0.00134431	9.46346	0.489256	4	50	translational initiation
Set1 ChIP	q4	BP	GO:0009085	0.00191071	42.0898	0.0684958	2	7	lysine biosynthetic process
Set1 ChIP	q4	BP	GO:0034641	0.00194592	3.98868	2.32886	8	238	cellular nitrogen compound metabolic process
Set1 ChIP	q4	BP	GO:0009067	0.00218816	13.3776	0.264198	3	27	aspartate family amino acid biosynthetic process
Set1 ChIP	q4	BP	GO:0009069	0.00269616	12.3438	0.283768	3	29	serine family amino acid metabolic process
Set1 ChIP	q4	BP	GO:0006553	0.00323469	30.0525	0.088066	2	9	lysine metabolic process
Set1 ChIP	q4	BP	GO:0006520	0.00330452	4.03003	1.98638	7	203	cellular amino acid metabolic process
Set1 ChIP	q4	BP	GO:0044106	0.00330452	4.03003	1.98638	7	203	cellular amine metabolic process
Set1 ChIP	q4	BP	GO:0009628	0.00375025	6.99931	0.645817	4	66	response to abiotic stimulus
Set1 ChIP	q4	BP	GO:0043436	0.00628394	3.24319	2.81811	8	288	oxoacid metabolic process
Set1 ChIP	q4	BP	GO:0019752	0.00628394	3.24319	2.81811	8	288	carboxylic acid metabolic process
Set1 ChIP	q4	BP	GO:0006082	0.00628394	3.24319	2.81811	8	288	organic acid metabolic process
Set1 ChIP	q4	BP	GO:0006807	0.00680041	2.09153	17.0261	26	1740	nitrogen compound metabolic process
Set1 ChIP	q4	BP	GO:0009308	0.00718951	3.45795	2.28972	7	234	amine metabolic process
Set1 ChIP	q4	BP	GO:0042180	0.00799386	3.10226	2.93553	8	300	cellular ketone metabolic process
Set1 ChIP	q4	BP	GO:0009070	0.00908725	16.1633	0.146777	2	15	serine family amino acid biosynthetic process
Set1 ChIP	q4	BP	GO:0034310	0.00978511	Inf	0.00978511	1	1	primary alcohol catabolic process
Set1 ChIP	q4	BP	GO:0030970	0.00978511	Inf	0.00978511	1	1	retrograde protein transport, ER to cytosol
Set1 ChIP	q4	BP	GO:0009306	0.00978511	Inf	0.00978511	1	1	protein secretion
Set1 ChIP	q4	BP	GO:0016259	0.00978511	Inf	0.00978511	1	1	selenocysteine metabolic process
Set1 ChIP	q4	BP	GO:0019413	0.00978511	Inf	0.00978511	1	1	acetate biosynthetic process
Set1 ChIP	q4	BP	GO:0051230	0.00978511	Inf	0.00978511	1	1	spindle disassembly
Set1 ChIP	q4	BP	GO:0006068	0.00978511	Inf	0.00978511	1	1	ethanol catabolic process
Set1 ChIP	q4	BP	GO:0000728	0.00978511	Inf	0.00978511	1	1	gene conversion at mating-type locus, DNA double-strand break formation
Set1 ChIP	q4	BP	GO:0001887	0.00978511	Inf	0.00978511	1	1	selenium compound metabolic process
Set1 ChIP	q4	BP	GO:0051716	0.013533	2.2582	6.7713	13	692	cellular response to stimulus
Set1 ChIP	q4	BP	GO:0042325	0.0139298	6.52041	0.508826	3	52	regulation of phosphorylation
Set1 ChIP	q4	BP	GO:0009156	0.0159395	11.6621	0.195702	2	20	ribonucleoside monophosphate biosynthetic process
Set1 ChIP	q4	BP	GO:0051174	0.0170022	6.02358	0.547966	3	56	regulation of phosphorus metabolic process
Set1 ChIP	q4	BP	GO:0019220	0.0170022	6.02358	0.547966	3	56	regulation of phosphate metabolic process
Set1 ChIP	q4	BP	GO:0009161	0.0191397	10.4918	0.215272	2	22	ribonucleoside monophosphate metabolic process
Set1 ChIP	q4	BP	GO:0006457	0.0194244	4.22111	1.03722	4	106	protein folding
Set1 ChIP	q4	BP	GO:0031582	0.0194763	103.2	0.0195702	1	2	replication fork arrest at rDNA repeats
Set1 ChIP	q4	BP	GO:0010741	0.0194763	103.2	0.0195702	1	2	negative regulation of intracellular protein kinase cascade
Set1 ChIP	q4	BP	GO:0006177	0.0194763	103.2	0.0195702	1	2	GMP biosynthetic process
Set1 ChIP	q4	BP	GO:0042256	0.0194763	103.2	0.0195702	1	2	mature ribosome assembly
Set1 ChIP	q4	BP	GO:0010627	0.0194763	103.2	0.0195702	1	2	regulation of intracellular protein kinase cascade
Set1 ChIP	q4	BP	GO:0051084	0.0194763	103.2	0.0195702	1	2	'de novo' posttranslational protein folding
Set1 ChIP	q4	BP	GO:0043408	0.0194763	103.2	0.0195702	1	2	regulation of MAPK cascade
Set1 ChIP	q4	BP	GO:0043409	0.0194763	103.2	0.0195702	1	2	negative regulation of MAPK cascade
Set1 ChIP	q4	BP	GO:0006545	0.0194763	103.2	0.0195702	1	2	glycine biosynthetic process
Set1 ChIP	q4	BP	GO:0043161	0.0200357	4.1793	1.04701	4	107	proteasomal ubiquitin-dependent protein catabolic process
Set1 ChIP	q4	BP	GO:0010498	0.021294	4.09807	1.06658	4	109	proteasomal protein catabolic process
Set1 ChIP	q4	BP	GO:0046999	0.0222691	5.40466	0.606677	3	62	regulation of conjugation
Set1 ChIP	q4	BP	GO:0031137	0.0222691	5.40466	0.606677	3	62	regulation of conjugation with cellular fusion
Set1 ChIP	q4	BP	GO:0043900	0.0232242	5.31354	0.616462	3	63	regulation of multi-organism process
Set1 ChIP	q4	BP	GO:0033554	0.0252745	2.10568	6.55602	12	670	cellular response to stress
Set1 ChIP	q4	BP	GO:0044237	0.0257809	1.94778	31.9582	39	3266	cellular metabolic process
Set1 ChIP	q4	BP	GO:0050896	0.0278415	2.02149	7.43668	13	760	response to stimulus
Set1 ChIP	q4	BP	GO:0048255	0.0290745	51.59	0.0293553	1	3	mRNA stabilization
Set1 ChIP	q4	BP	GO:0046049	0.0290745	51.59	0.0293553	1	3	UMP metabolic process
Set1 ChIP	q4	BP	GO:0046037	0.0290745	51.59	0.0293553	1	3	GMP metabolic process
Set1 ChIP	q4	BP	GO:0006222	0.0290745	51.59	0.0293553	1	3	UMP biosynthetic process
Set1 ChIP	q4	BP	GO:0043489	0.0290745	51.59	0.0293553	1	3	RNA stabilization
Set1 ChIP	q4	BP	GO:0009173	0.0290745	51.59	0.0293553	1	3	pyrimidine ribonucleoside monophosphate metabolic process
Set1 ChIP	q4	BP	GO:0009174	0.0290745	51.59	0.0293553	1	3	pyrimidine ribonucleoside monophosphate biosynthetic process
Set1 ChIP	q4	BP	GO:0006567	0.0290745	51.59	0.0293553	1	3	threonine catabolic process
Set1 ChIP	q4	BP	GO:0006529	0.0290745	51.59	0.0293553	1	3	asparagine biosynthetic process
Set1 ChIP	q4	BP	GO:0009987	0.0311702	2.99172	43.0153	48	4396	cellular process
Set1 ChIP	q4	BP	GO:0006950	0.0332838	2.01056	6.82022	12	697	response to stress
Set1 ChIP	q4	BP	GO:0042254	0.0346953	2.46413	3.13124	7	320	ribosome biogenesis
Set1 ChIP	q4	BP	GO:0008152	0.0364301	1.86068	32.4964	39	3321	metabolic process
Set1 ChIP	q4	BP	GO:0007000	0.0385806	34.3867	0.0391404	1	4	nucleolus organization
Set1 ChIP	q4	BP	GO:0007009	0.0385806	34.3867	0.0391404	1	4	plasma membrane organization
Set1 ChIP	q4	BP	GO:0009129	0.0385806	34.3867	0.0391404	1	4	pyrimidine nucleoside monophosphate metabolic process
Set1 ChIP	q4	BP	GO:0009130	0.0385806	34.3867	0.0391404	1	4	pyrimidine nucleoside monophosphate biosynthetic process
Set1 ChIP	q4	BP	GO:0006564	0.0385806	34.3867	0.0391404	1	4	L-serine biosynthetic process
Set1 ChIP	q4	BP	GO:0006083	0.0385806	34.3867	0.0391404	1	4	acetate metabolic process
Set1 ChIP	q4	BP	GO:0009124	0.0408704	6.75444	0.322909	2	33	nucleoside monophosphate biosynthetic process
Set1 ChIP	q4	BP	GO:0043549	0.0431582	6.54209	0.332694	2	34	regulation of kinase activity
Set1 ChIP	q4	BP	GO:0045859	0.0431582	6.54209	0.332694	2	34	regulation of protein kinase activity
Set1 ChIP	q4	BP	GO:0051338	0.045493	6.34261	0.342479	2	35	regulation of transferase activity
Set1 ChIP	q4	BP	GO:0045936	0.0479955	25.785	0.0489256	1	5	negative regulation of phosphate metabolic process
Set1 ChIP	q4	BP	GO:0042326	0.0479955	25.785	0.0489256	1	5	negative regulation of phosphorylation
Set1 ChIP	q4	BP	GO:0010563	0.0479955	25.785	0.0489256	1	5	negative regulation of phosphorus metabolic process
Set1 ChIP	q4	BP	GO:0012501	0.0479955	25.785	0.0489256	1	5	programmed cell death
Set1 ChIP	q4	BP	GO:0016265	0.0479955	25.785	0.0489256	1	5	death
Set1 ChIP	q4	BP	GO:0009220	0.0479955	25.785	0.0489256	1	5	pyrimidine ribonucleotide biosynthetic process
Set1 ChIP	q4	BP	GO:0009218	0.0479955	25.785	0.0489256	1	5	pyrimidine ribonucleotide metabolic process
Set1 ChIP	q4	BP	GO:0008219	0.0479955	25.785	0.0489256	1	5	cell death
Set1 ChIP	q4	BP	GO:0031120	0.0479955	25.785	0.0489256	1	5	snRNA pseudouridine synthesis
Set1 ChIP	q4	BP	GO:0031118	0.0479955	25.785	0.0489256	1	5	rRNA pseudouridine synthesis
Set1 ChIP	q4	BP	GO:0040031	0.0479955	25.785	0.0489256	1	5	snRNA modification
Set1 ChIP	q4	BP	GO:0006915	0.0479955	25.785	0.0489256	1	5	apoptotic process
Set1 ChIP	q4	BP	GO:0042026	0.0479955	25.785	0.0489256	1	5	protein refolding
Set1 ChIP	q4	CC	GO:0000120	0.00425713	25.4853	0.10076	2	10	RNA polymerase I transcription factor complex
Set1 ChIP	q4	CC	GO:0009277	0.0084065	7.95077	0.423194	3	42	fungal-type cell wall
Set1 ChIP	q4	CC	GO:0005668	0.010076	Inf	0.010076	1	1	RNA polymerase transcription factor SL1 complex
Set1 ChIP	q4	CC	GO:0044452	0.0175298	5.94808	0.554183	3	55	nucleolar part
Set1 ChIP	q4	CC	GO:0044432	0.0177161	3.14684	2.10589	6	209	endoplasmic reticulum part
Set1 ChIP	q4	CC	GO:0009986	0.0194932	4.21192	1.03783	4	103	cell surface
Set1 ChIP	q4	CC	GO:0032541	0.0200525	100.115	0.0201521	1	2	cortical endoplasmic reticulum
Set1 ChIP	q4	CC	GO:0032126	0.0200525	100.115	0.0201521	1	2	eisosome
Set1 ChIP	q4	CC	GO:0005948	0.0200525	100.115	0.0201521	1	2	acetolactate synthase complex
Set1 ChIP	q4	CC	GO:0005618	0.0230562	5.32655	0.614639	3	61	cell wall
Set1 ChIP	q4	CC	GO:0030312	0.0230562	5.32655	0.614639	3	61	external encapsulating structure
Set1 ChIP	q4	CC	GO:0000126	0.0299302	50.0481	0.0302281	1	3	transcription factor TFIIIB complex
Set1 ChIP	q4	CC	GO:0034098	0.0299302	50.0481	0.0302281	1	3	Cdc48p-Npl4p-Ufd1p AAA ATPase complex
Set1 ChIP	q4	CC	GO:0033551	0.0397103	33.359	0.0403042	1	4	monopolin complex
Set1 ChIP	q4	CC	GO:0000346	0.0493935	25.0144	0.0503802	1	5	transcription export complex
Set1 ChIP	q4	CC	GO:0031429	0.0493935	25.0144	0.0503802	1	5	box H/ACA snoRNP complex
Set1 ChIP	q5	MF	GO:0003843	1.01182e-05	152.882	0.0513894	3	5	1,3-beta-D-glucan synthase activity
Set1 ChIP	q5	MF	GO:0035251	0.000117065	43.6387	0.102779	3	10	UDP-glucosyltransferase activity
Set1 ChIP	q5	MF	GO:0008194	0.000169996	17.2533	0.287781	4	28	UDP-glycosyltransferase activity
Set1 ChIP	q5	MF	GO:0046527	0.00027297	30.5294	0.133612	3	13	glucosyltransferase activity
Set1 ChIP	q5	MF	GO:0004088	0.000309042	199.962	0.0308337	2	3	carbamoyl-phosphate synthase (glutamine-hydrolyzing) activity
Set1 ChIP	q5	MF	GO:0016758	0.000893721	7.58799	0.760563	5	74	transferase activity, transferring hexosyl groups
Set1 ChIP	q5	MF	GO:0004012	0.00151485	49.9615	0.0616673	2	6	phospholipid-translocating ATPase activity
Set1 ChIP	q5	MF	GO:0015247	0.00151485	49.9615	0.0616673	2	6	aminophospholipid transporter activity
Set1 ChIP	q5	MF	GO:0016757	0.00237266	5.99695	0.945565	5	92	transferase activity, transferring glycosyl groups
Set1 ChIP	q5	MF	GO:0043167	0.00285828	2.88889	4.93338	12	480	ion binding
Set1 ChIP	q5	MF	GO:0043169	0.00285828	2.88889	4.93338	12	480	cation binding
Set1 ChIP	q5	MF	GO:0004556	0.0044262	24.9615	0.102779	2	10	alpha-amylase activity
Set1 ChIP	q5	MF	GO:0016160	0.0044262	24.9615	0.102779	2	10	amylase activity
Set1 ChIP	q5	MF	GO:0005548	0.00640685	19.9615	0.123335	2	12	phospholipid transporter activity
Set1 ChIP	q5	MF	GO:0046872	0.00646166	2.68718	4.75866	11	463	metal ion binding
Set1 ChIP	q5	MF	GO:0016884	0.0075221	18.1434	0.133612	2	13	carbon-nitrogen ligase activity, with glutamine as amido-N-donor
Set1 ChIP	q5	MF	GO:0005319	0.0075221	18.1434	0.133612	2	13	lipid transporter activity
Set1 ChIP	q5	MF	GO:0016538	0.0087183	16.6282	0.14389	2	14	cyclin-dependent protein kinase regulator activity
Set1 ChIP	q5	MF	GO:0004070	0.0102779	Inf	0.0102779	1	1	aspartate carbamoyltransferase activity
Set1 ChIP	q5	MF	GO:0004553	0.0128124	6.73856	0.493338	3	48	hydrolase activity, hydrolyzing O-glycosyl compounds
Set1 ChIP	q5	MF	GO:0043492	0.0175989	5.93887	0.555006	3	54	ATPase activity, coupled to movement of substances
Set1 ChIP	q5	MF	GO:0043565	0.0203187	5.60566	0.585839	3	57	sequence-specific DNA binding
Set1 ChIP	q5	MF	GO:0010844	0.0204521	98.0943	0.0205558	1	2	recombination hotspot binding
Set1 ChIP	q5	MF	GO:0033201	0.0204521	98.0943	0.0205558	1	2	alpha-1,4-glucan synthase activity
Set1 ChIP	q5	MF	GO:0016743	0.0204521	98.0943	0.0205558	1	2	carboxyl- or carbamoyltransferase activity
Set1 ChIP	q5	MF	GO:0022833	0.0204521	98.0943	0.0205558	1	2	mechanically gated channel activity
Set1 ChIP	q5	MF	GO:0004414	0.0204521	98.0943	0.0205558	1	2	homoserine O-acetyltransferase activity
Set1 ChIP	q5	MF	GO:0017091	0.0204521	98.0943	0.0205558	1	2	AU-rich element binding
Set1 ChIP	q5	MF	GO:0008381	0.0204521	98.0943	0.0205558	1	2	mechanically-gated ion channel activity
Set1 ChIP	q5	MF	GO:0004151	0.0204521	98.0943	0.0205558	1	2	dihydroorotase activity
Set1 ChIP	q5	MF	GO:0003922	0.0204521	98.0943	0.0205558	1	2	GMP synthase (glutamine-hydrolyzing) activity
Set1 ChIP	q5	MF	GO:0003700	0.0222537	5.40336	0.606395	3	59	sequence-specific DNA binding transcription factor activity
Set1 ChIP	q5	MF	GO:0016798	0.0232579	5.30753	0.616673	3	60	hydrolase activity, acting on glycosyl bonds
Set1 ChIP	q5	MF	GO:0008270	0.0254507	2.63692	2.9292	7	285	zinc ion binding
Set1 ChIP	q5	MF	GO:0042803	0.0330478	7.65385	0.287781	2	28	protein homodimerization activity
Set1 ChIP	q5	MF	GO:0003729	0.0398695	6.85809	0.318614	2	31	mRNA binding
Set1 ChIP	q5	MF	GO:0019207	0.0398695	6.85809	0.318614	2	31	kinase regulator activity
Set1 ChIP	q5	MF	GO:0019887	0.0398695	6.85809	0.318614	2	31	protein kinase regulator activity
Set1 ChIP	q5	MF	GO:0016413	0.0404934	32.6855	0.0411115	1	4	O-acetyltransferase activity
Set1 ChIP	q5	MF	GO:0016812	0.0404934	32.6855	0.0411115	1	4	hydrolase activity, acting on carbon-nitrogen (but not peptide) bonds, in cyclic amides
Set1 ChIP	q5	MF	GO:0008496	0.0404934	32.6855	0.0411115	1	4	mannan endo-1,6-alpha-mannosidase activity
Set1 ChIP	q5	MF	GO:0005215	0.0470189	2.2865	3.34031	7	325	transporter activity
Set1 ChIP	q5	BP	GO:0009272	4.54644e-08	15.6708	0.766692	9	74	fungal-type cell wall biogenesis
Set1 ChIP	q5	BP	GO:0042546	2.1052e-07	12.8582	0.911742	9	88	cell wall biogenesis
Set1 ChIP	q5	BP	GO:0070882	3.93656e-06	8.77043	1.28473	9	124	cellular cell wall organization or biogenesis
Set1 ChIP	q5	BP	GO:0044264	8.27415e-06	11.4907	0.756332	7	73	cellular polysaccharide metabolic process
Set1 ChIP	q5	BP	GO:0005976	8.27415e-06	11.4907	0.756332	7	73	polysaccharide metabolic process
Set1 ChIP	q5	BP	GO:0009250	1.1573e-05	20.951	0.310821	5	30	glucan biosynthetic process
Set1 ChIP	q5	BP	GO:0044042	3.35049e-05	16.3457	0.383346	5	37	glucan metabolic process
Set1 ChIP	q5	BP	GO:0006073	3.35049e-05	16.3457	0.383346	5	37	cellular glucan metabolic process
Set1 ChIP	q5	BP	GO:0051274	4.41073e-05	25.71	0.207214	4	20	beta-glucan biosynthetic process
Set1 ChIP	q5	BP	GO:0031328	5.72241e-05	10.4447	0.694167	6	67	positive regulation of cellular biosynthetic process
Set1 ChIP	q5	BP	GO:0009891	5.72241e-05	10.4447	0.694167	6	67	positive regulation of biosynthetic process
Set1 ChIP	q5	BP	GO:0033692	7.05837e-05	13.7487	0.44551	5	43	cellular polysaccharide biosynthetic process
Set1 ChIP	q5	BP	GO:0000271	7.05837e-05	13.7487	0.44551	5	43	polysaccharide biosynthetic process
Set1 ChIP	q5	BP	GO:0034410	0.000119869	43.2857	0.103607	3	10	cell wall beta-glucan biosynthetic process
Set1 ChIP	q5	BP	GO:0034411	0.000119869	43.2857	0.103607	3	10	cell wall (1->3)-beta-D-glucan biosynthetic process
Set1 ChIP	q5	BP	GO:0006075	0.000119869	43.2857	0.103607	3	10	(1->3)-beta-D-glucan biosynthetic process
Set1 ChIP	q5	BP	GO:0051273	0.000129966	18.6764	0.269378	4	26	beta-glucan metabolic process
Set1 ChIP	q5	BP	GO:0034637	0.000177574	11.0964	0.538757	5	52	cellular carbohydrate biosynthetic process
Set1 ChIP	q5	BP	GO:0034407	0.000216553	33.6536	0.124328	3	12	cell wall (1->3)-beta-D-glucan metabolic process
Set1 ChIP	q5	BP	GO:0043604	0.000216553	33.6536	0.124328	3	12	amide biosynthetic process
Set1 ChIP	q5	BP	GO:0031325	0.000247103	7.83488	0.901381	6	87	positive regulation of cellular metabolic process
Set1 ChIP	q5	BP	GO:0010628	0.000252927	10.2181	0.5802	5	56	positive regulation of gene expression
Set1 ChIP	q5	BP	GO:0045893	0.000252927	10.2181	0.5802	5	56	positive regulation of transcription, DNA-dependent
Set1 ChIP	q5	BP	GO:0009893	0.00026309	7.7378	0.911742	6	88	positive regulation of metabolic process
Set1 ChIP	q5	BP	GO:0051254	0.000275081	10.0196	0.59056	5	57	positive regulation of RNA metabolic process
Set1 ChIP	q5	BP	GO:0006074	0.000279458	30.2824	0.134689	3	13	(1->3)-beta-D-glucan metabolic process
Set1 ChIP	q5	BP	GO:0045935	0.000323787	9.64475	0.611282	5	59	positive regulation of nucleobase-containing compound metabolic process
Set1 ChIP	q5	BP	GO:0051173	0.000323787	9.64475	0.611282	5	59	positive regulation of nitrogen compound metabolic process
Set1 ChIP	q5	BP	GO:0051278	0.000535271	23.2805	0.165771	3	16	fungal-type cell wall polysaccharide biosynthetic process
Set1 ChIP	q5	BP	GO:0010557	0.000547134	8.52626	0.683807	5	66	positive regulation of macromolecule biosynthetic process
Set1 ChIP	q5	BP	GO:0034406	0.000768606	20.1686	0.186493	3	18	cell wall beta-glucan metabolic process
Set1 ChIP	q5	BP	GO:0022603	0.000784688	11.0724	0.424789	4	41	regulation of anatomical structure morphogenesis
Set1 ChIP	q5	BP	GO:0022604	0.000784688	11.0724	0.424789	4	41	regulation of cell morphogenesis
Set1 ChIP	q5	BP	GO:0044262	0.000814493	4.59759	2.0307	8	196	cellular carbohydrate metabolic process
Set1 ChIP	q5	BP	GO:0016051	0.000870503	7.63806	0.756332	5	73	carbohydrate biosynthetic process
Set1 ChIP	q5	BP	GO:0070592	0.000906053	18.9044	0.196853	3	19	cell wall polysaccharide biosynthetic process
Set1 ChIP	q5	BP	GO:0045332	0.00103289	66.0897	0.0518035	2	5	phospholipid translocation
Set1 ChIP	q5	BP	GO:0006366	0.00107305	3.69337	3.20146	10	309	transcription from RNA polymerase II promoter
Set1 ChIP	q5	BP	GO:0050793	0.00142903	9.29818	0.497314	4	48	regulation of developmental process
Set1 ChIP	q5	BP	GO:0034204	0.00153904	49.5577	0.0621642	2	6	lipid translocation
Set1 ChIP	q5	BP	GO:0010382	0.00160814	15.1118	0.238296	3	23	cellular cell wall macromolecule metabolic process
Set1 ChIP	q5	BP	GO:0010604	0.00182312	6.39582	0.891021	5	86	positive regulation of macromolecule metabolic process
Set1 ChIP	q5	BP	GO:0050789	0.00189554	2.4284	11.3139	21	1092	regulation of biological process
Set1 ChIP	q5	BP	GO:0046379	0.00205815	13.7326	0.259018	3	25	extracellular polysaccharide metabolic process
Set1 ChIP	q5	BP	GO:0048522	0.00251334	4.87306	1.3987	6	135	positive regulation of cellular process
Set1 ChIP	q5	BP	GO:0010383	0.00257944	12.5833	0.279739	3	27	cell wall polysaccharide metabolic process
Set1 ChIP	q5	BP	GO:0048518	0.00260861	4.83462	1.40906	6	136	positive regulation of biological process
Set1 ChIP	q5	BP	GO:0000055	0.00283489	33.0256	0.0828856	2	8	ribosomal large subunit export from nucleus
Set1 ChIP	q5	BP	GO:0005975	0.0034673	3.59518	2.54873	8	246	carbohydrate metabolic process
Set1 ChIP	q5	BP	GO:0000050	0.00362071	28.3022	0.0932464	2	9	urea cycle
Set1 ChIP	q5	BP	GO:0050794	0.00370081	2.29865	11.0963	20	1071	regulation of cellular process
Set1 ChIP	q5	BP	GO:0044085	0.00384107	2.51574	7.24213	15	699	cellular component biogenesis
Set1 ChIP	q5	BP	GO:0044275	0.00384983	10.7773	0.321182	3	31	cellular carbohydrate catabolic process
Set1 ChIP	q5	BP	GO:0034599	0.00412957	6.79733	0.663085	4	64	cellular response to oxidative stress
Set1 ChIP	q5	BP	GO:0044038	0.0042172	10.4037	0.331543	3	32	cell wall macromolecule biosynthetic process
Set1 ChIP	q5	BP	GO:0070589	0.0042172	10.4037	0.331543	3	32	cellular component macromolecule biosynthetic process
Set1 ChIP	q5	BP	GO:0051039	0.00449592	24.7596	0.103607	2	10	positive regulation of transcription during meiosis
Set1 ChIP	q5	BP	GO:0070887	0.00453774	5.10911	1.09823	5	106	cellular response to chemical stimulus
Set1 ChIP	q5	BP	GO:0006979	0.00461338	6.57548	0.683807	4	66	response to oxidative stress
Set1 ChIP	q5	BP	GO:0043549	0.00501419	9.72865	0.352264	3	34	regulation of kinase activity
Set1 ChIP	q5	BP	GO:0045859	0.00501419	9.72865	0.352264	3	34	regulation of protein kinase activity
Set1 ChIP	q5	BP	GO:0065007	0.00512723	2.17228	13.0752	22	1262	biological regulation
Set1 ChIP	q5	BP	GO:0042221	0.00514686	4.17333	1.61627	6	156	response to chemical stimulus
Set1 ChIP	q5	BP	GO:0000917	0.00544444	9.42279	0.362625	3	35	barrier septum assembly
Set1 ChIP	q5	BP	GO:0051338	0.00544444	9.42279	0.362625	3	35	regulation of transferase activity
Set1 ChIP	q5	BP	GO:0032878	0.00545865	22.0043	0.113968	2	11	regulation of establishment or maintenance of cell polarity
Set1 ChIP	q5	BP	GO:0000080	0.00545865	22.0043	0.113968	2	11	G1 phase of mitotic cell cycle
Set1 ChIP	q5	BP	GO:0051318	0.00545865	22.0043	0.113968	2	11	G1 phase
Set1 ChIP	q5	BP	GO:0051252	0.00694177	2.95474	3.4812	9	336	regulation of RNA metabolic process
Set1 ChIP	q5	BP	GO:0051128	0.00725724	3.44084	2.28972	7	221	regulation of cellular component organization
Set1 ChIP	q5	BP	GO:0044247	0.00763936	17.9965	0.134689	2	13	cellular polysaccharide catabolic process
Set1 ChIP	q5	BP	GO:0015914	0.00763936	17.9965	0.134689	2	13	phospholipid transport
Set1 ChIP	q5	BP	GO:0006351	0.00894031	2.55759	4.97314	11	480	transcription, DNA-dependent
Set1 ChIP	q5	BP	GO:0044036	0.00907534	7.72097	0.43515	3	42	cell wall macromolecule metabolic process
Set1 ChIP	q5	BP	GO:0000910	0.00935726	4.24777	1.30545	5	126	cytokinesis
Set1 ChIP	q5	BP	GO:0032774	0.00963916	2.52792	5.02494	11	485	RNA biosynthetic process
Set1 ChIP	q5	BP	GO:0051037	0.0101485	15.2219	0.155411	2	15	regulation of transcription during meiosis
Set1 ChIP	q5	BP	GO:0000272	0.0101485	15.2219	0.155411	2	15	polysaccharide catabolic process
Set1 ChIP	q5	BP	GO:0045991	0.0103607	Inf	0.0103607	1	1	carbon catabolite activation of transcription
Set1 ChIP	q5	BP	GO:0031671	0.0103607	Inf	0.0103607	1	1	primary cell septum biogenesis
Set1 ChIP	q5	BP	GO:0045911	0.0103607	Inf	0.0103607	1	1	positive regulation of DNA recombination
Set1 ChIP	q5	BP	GO:0016049	0.0103607	Inf	0.0103607	1	1	cell growth
Set1 ChIP	q5	BP	GO:0010845	0.0103607	Inf	0.0103607	1	1	positive regulation of reciprocal meiotic recombination
Set1 ChIP	q5	BP	GO:0010846	0.0103607	Inf	0.0103607	1	1	activation of reciprocal meiotic recombination
Set1 ChIP	q5	BP	GO:0043392	0.0103607	Inf	0.0103607	1	1	negative regulation of DNA binding
Set1 ChIP	q5	BP	GO:0010513	0.0103607	Inf	0.0103607	1	1	positive regulation of phosphatidylinositol biosynthetic process
Set1 ChIP	q5	BP	GO:0046016	0.0103607	Inf	0.0103607	1	1	positive regulation of transcription by glucose
Set1 ChIP	q5	BP	GO:0043433	0.0103607	Inf	0.0103607	1	1	negative regulation of sequence-specific DNA binding transcription factor activity
Set1 ChIP	q5	BP	GO:0000429	0.0103607	Inf	0.0103607	1	1	carbon catabolite regulation of transcription from RNA polymerase II promoter
Set1 ChIP	q5	BP	GO:0000430	0.0103607	Inf	0.0103607	1	1	regulation of transcription from RNA polymerase II promoter by glucose
Set1 ChIP	q5	BP	GO:0000432	0.0103607	Inf	0.0103607	1	1	positive regulation of transcription from RNA polymerase II promoter by glucose
Set1 ChIP	q5	BP	GO:0000436	0.0103607	Inf	0.0103607	1	1	carbon catabolite activation of transcription from RNA polymerase II promoter
Set1 ChIP	q5	BP	GO:0009826	0.0103607	Inf	0.0103607	1	1	unidimensional cell growth
Set1 ChIP	q5	BP	GO:0051100	0.0103607	Inf	0.0103607	1	1	negative regulation of binding
Set1 ChIP	q5	BP	GO:0043619	0.0103607	Inf	0.0103607	1	1	regulation of transcription from RNA polymerase II promoter in response to oxidative stress
Set1 ChIP	q5	BP	GO:0019627	0.0115218	14.1319	0.165771	2	16	urea metabolic process
Set1 ChIP	q5	BP	GO:0000902	0.0116752	4.9522	0.891021	4	86	cell morphogenesis
Set1 ChIP	q5	BP	GO:0051301	0.0151595	3.73976	1.47122	5	142	cell division
Set1 ChIP	q5	BP	GO:0048856	0.0152228	4.5564	0.963546	4	93	anatomical structure development
Set1 ChIP	q5	BP	GO:0032989	0.0152228	4.5564	0.963546	4	93	cellular component morphogenesis
Set1 ChIP	q5	BP	GO:0009653	0.0152228	4.5564	0.963546	4	93	anatomical structure morphogenesis
Set1 ChIP	q5	BP	GO:0042325	0.0162485	6.13325	0.538757	3	52	regulation of phosphorylation
Set1 ChIP	q5	BP	GO:0010468	0.0177621	2.50052	4.05104	9	391	regulation of gene expression
Set1 ChIP	q5	BP	GO:0000079	0.0177673	10.9829	0.207214	2	20	regulation of cyclin-dependent protein kinase activity
Set1 ChIP	q5	BP	GO:0006869	0.0177673	10.9829	0.207214	2	20	lipid transport
Set1 ChIP	q5	BP	GO:0044087	0.0179746	5.89043	0.559478	3	54	regulation of cellular component biogenesis
Set1 ChIP	q5	BP	GO:0006355	0.0185201	2.62935	3.39831	8	328	regulation of transcription, DNA-dependent
Set1 ChIP	q5	BP	GO:0051174	0.0197994	5.66593	0.5802	3	56	regulation of phosphorus metabolic process
Set1 ChIP	q5	BP	GO:0019220	0.0197994	5.66593	0.5802	3	56	regulation of phosphate metabolic process
Set1 ChIP	q5	BP	GO:0043603	0.0197994	5.66593	0.5802	3	56	cellular amide metabolic process
Set1 ChIP	q5	BP	GO:0019219	0.0200282	2.44513	4.13392	9	399	regulation of nucleobase-containing compound metabolic process
Set1 ChIP	q5	BP	GO:0010511	0.020616	97.3019	0.0207214	1	2	regulation of phosphatidylinositol biosynthetic process
Set1 ChIP	q5	BP	GO:0034756	0.020616	97.3019	0.0207214	1	2	regulation of iron ion transport
Set1 ChIP	q5	BP	GO:0045128	0.020616	97.3019	0.0207214	1	2	negative regulation of reciprocal meiotic recombination
Set1 ChIP	q5	BP	GO:0032506	0.0206977	4.13061	1.05679	4	102	cytokinetic process
Set1 ChIP	q5	BP	GO:0031323	0.0209917	2.2291	5.6155	11	542	regulation of cellular metabolic process
Set1 ChIP	q5	BP	GO:0051171	0.0215484	2.41165	4.18573	9	404	regulation of nitrogen compound metabolic process
Set1 ChIP	q5	BP	GO:0006879	0.0251385	8.97902	0.248657	2	24	cellular iron ion homeostasis
Set1 ChIP	q5	BP	GO:0055072	0.0251385	8.97902	0.248657	2	24	iron ion homeostasis
Set1 ChIP	q5	BP	GO:0019222	0.0252014	2.16083	5.77091	11	557	regulation of metabolic process
Set1 ChIP	q5	BP	GO:0032955	0.0271455	8.58696	0.259018	2	25	regulation of barrier septum assembly
Set1 ChIP	q5	BP	GO:0000746	0.0280505	3.74074	1.1604	4	112	conjugation
Set1 ChIP	q5	BP	GO:0000747	0.0280505	3.74074	1.1604	4	112	conjugation with cellular fusion
Set1 ChIP	q5	BP	GO:0051704	0.0288614	3.70569	1.17076	4	113	multi-organism process
Set1 ChIP	q5	BP	GO:0043949	0.030767	48.6415	0.0310821	1	3	regulation of cAMP-mediated signaling
Set1 ChIP	q5	BP	GO:0010848	0.030767	48.6415	0.0310821	1	3	regulation of chromatin disassembly
Set1 ChIP	q5	BP	GO:0010520	0.030767	48.6415	0.0310821	1	3	regulation of reciprocal meiotic recombination
Set1 ChIP	q5	BP	GO:0031990	0.030767	48.6415	0.0310821	1	3	mRNA export from nucleus in response to heat stress
Set1 ChIP	q5	BP	GO:0010610	0.030767	48.6415	0.0310821	1	3	regulation of mRNA stability involved in response to stress
Set1 ChIP	q5	BP	GO:0006768	0.030767	48.6415	0.0310821	1	3	biotin metabolic process
Set1 ChIP	q5	BP	GO:0000011	0.030767	48.6415	0.0310821	1	3	vacuole inheritance
Set1 ChIP	q5	BP	GO:0010963	0.030767	48.6415	0.0310821	1	3	regulation of L-arginine import
Set1 ChIP	q5	BP	GO:0010959	0.030767	48.6415	0.0310821	1	3	regulation of metal ion transport
Set1 ChIP	q5	BP	GO:0009102	0.030767	48.6415	0.0310821	1	3	biotin biosynthetic process
Set1 ChIP	q5	BP	GO:0043620	0.030767	48.6415	0.0310821	1	3	regulation of DNA-dependent transcription in response to stress
Set1 ChIP	q5	BP	GO:0043618	0.030767	48.6415	0.0310821	1	3	regulation of transcription from RNA polymerase II promoter in response to stress
Set1 ChIP	q5	BP	GO:0033750	0.0335367	7.59172	0.2901	2	28	ribosome localization
Set1 ChIP	q5	BP	GO:0033753	0.0335367	7.59172	0.2901	2	28	establishment of ribosome localization
Set1 ChIP	q5	BP	GO:0000054	0.0335367	7.59172	0.2901	2	28	ribosomal subunit export from nucleus
Set1 ChIP	q5	BP	GO:0051329	0.0340761	4.53832	0.714889	3	69	interphase of mitotic cell cycle
Set1 ChIP	q5	BP	GO:0080090	0.0346333	2.11259	5.29432	10	511	regulation of primary metabolic process
Set1 ChIP	q5	BP	GO:0006401	0.0379619	4.33845	0.745971	3	72	RNA catabolic process
Set1 ChIP	q5	BP	GO:0007033	0.0380916	7.0467	0.310821	2	30	vacuole organization
Set1 ChIP	q5	BP	GO:0016052	0.0393058	4.27563	0.756332	3	73	carbohydrate catabolic process
Set1 ChIP	q5	BP	GO:0031326	0.040187	2.13394	4.67268	9	451	regulation of cellular biosynthetic process
Set1 ChIP	q5	BP	GO:0051325	0.0406737	4.21458	0.766692	3	74	interphase
Set1 ChIP	q5	BP	GO:0009889	0.0406761	2.12867	4.68304	9	452	regulation of biosynthetic process
Set1 ChIP	q5	BP	GO:0046685	0.0408148	32.4214	0.0414428	1	4	response to arsenic-containing substance
Set1 ChIP	q5	BP	GO:0051692	0.0408148	32.4214	0.0414428	1	4	cellular oligosaccharide catabolic process
Set1 ChIP	q5	BP	GO:0031647	0.0408148	32.4214	0.0414428	1	4	regulation of protein stability
Set1 ChIP	q5	BP	GO:0009092	0.0408148	32.4214	0.0414428	1	4	homoserine metabolic process
Set1 ChIP	q5	BP	GO:0051054	0.0408148	32.4214	0.0414428	1	4	positive regulation of DNA metabolic process
Set1 ChIP	q5	BP	GO:0033674	0.0408148	32.4214	0.0414428	1	4	positive regulation of kinase activity
Set1 ChIP	q5	BP	GO:0010958	0.0408148	32.4214	0.0414428	1	4	regulation of amino acid import
Set1 ChIP	q5	BP	GO:0051347	0.0408148	32.4214	0.0414428	1	4	positive regulation of transferase activity
Set1 ChIP	q5	BP	GO:0045860	0.0408148	32.4214	0.0414428	1	4	positive regulation of protein kinase activity
Set1 ChIP	q5	BP	GO:0045834	0.0408148	32.4214	0.0414428	1	4	positive regulation of lipid metabolic process
Set1 ChIP	q5	BP	GO:0045836	0.0408148	32.4214	0.0414428	1	4	positive regulation of meiosis
Set1 ChIP	q5	BP	GO:0046889	0.0408148	32.4214	0.0414428	1	4	positive regulation of lipid biosynthetic process
Set1 ChIP	q5	BP	GO:0008360	0.0428688	6.57436	0.331543	2	32	regulation of cell shape
Set1 ChIP	q5	BP	GO:0050896	0.0429121	1.8723	7.87414	13	760	response to stimulus
Set1 ChIP	q5	BP	GO:0044265	0.0460952	2.2976	3.32579	7	321	cellular macromolecule catabolic process
Set1 ChIP	q5	BP	GO:0010948	0.0478722	3.93344	0.818496	3	79	negative regulation of cell cycle process
Set1 ChIP	q5	CC	GO:0005886	2.81754e-07	8.16558	1.93004	12	188	plasma membrane
Set1 ChIP	q5	CC	GO:0000148	1.00837e-05	153.059	0.0513308	3	5	1,3-beta-D-glucan synthase complex
Set1 ChIP	q5	CC	GO:0044459	7.485e-05	7.92775	1.05741	7	103	plasma membrane part
Set1 ChIP	q5	CC	GO:0031224	0.00135766	2.58684	9.4654	19	922	intrinsic to membrane
Set1 ChIP	q5	CC	GO:0044425	0.0018066	2.43969	11.2722	21	1098	membrane part
Set1 ChIP	q5	CC	GO:0030428	0.00225045	13.2558	0.26692	3	26	cell septum
Set1 ChIP	q5	CC	GO:0016021	0.00327118	2.4019	9.39354	18	915	integral to membrane
Set1 ChIP	q5	CC	GO:0016020	0.00428524	2.21293	12.8943	22	1256	membrane
Set1 ChIP	q5	CC	GO:0009897	0.00530805	9.51103	0.359316	3	35	external side of plasma membrane
Set1 ChIP	q5	CC	GO:0031226	0.0158592	6.19088	0.53384	3	52	intrinsic to plasma membrane
Set1 ChIP	q5	CC	GO:0044457	0.0204289	98.2075	0.0205323	1	2	cell septum part
Set1 ChIP	q5	CC	GO:0005951	0.0204289	98.2075	0.0205323	1	2	carbamoyl-phosphate synthase complex
Set1 ChIP	q5	CC	GO:0043187	0.0204289	98.2075	0.0205323	1	2	cell septum surface
Set1 ChIP	q5	CC	GO:0009986	0.0207439	4.12687	1.05741	4	103	cell surface
Set1 ChIP	q5	CC	GO:0032153	0.0232283	2.69122	2.87452	7	280	cell division site
Set1 ChIP	q5	CC	GO:0005618	0.0242149	5.2211	0.626236	3	61	cell wall
Set1 ChIP	q5	CC	GO:0030312	0.0242149	5.2211	0.626236	3	61	external encapsulating structure
Set1 ChIP	q5	CC	GO:0034064	0.0304891	49.0943	0.0307985	1	3	Tor2-Mei2-Ste11 complex
Set1 ChIP	q5	CC	GO:0070772	0.0304891	49.0943	0.0307985	1	3	PAS complex
Set1 ChIP	q5	CC	GO:0030427	0.0348305	2.96862	1.82738	5	178	site of polarized growth
Set1 ChIP	q5	CC	GO:0031520	0.0404479	32.7233	0.0410646	1	4	plasma membrane of cell tip
Set1 ChIP	q5	CC	GO:0031362	0.0404479	32.7233	0.0410646	1	4	anchored to external side of plasma membrane
Set1 ChIP	q5	CC	GO:0000307	0.0404479	32.7233	0.0410646	1	4	cyclin-dependent protein kinase holoenzyme complex
Set1 ChIP	q5	CC	GO:0000322	0.0405336	3.30602	1.3038	4	127	storage vacuole
Set1 ChIP	q5	CC	GO:0000323	0.0405336	3.30602	1.3038	4	127	lytic vacuole
Set1 ChIP	q5	CC	GO:0000324	0.0405336	3.30602	1.3038	4	127	fungal-type vacuole
