# Supplementary material for: Heterochromatin assembly and transcriptome repression by Set1 in coordination with a class II histone deacetylase
Source: eLife. 2014 Dec 15;3:e04506. doi: 10.7554/eLife.04506 (PMC4383021; doi:10.7554/eLife.04506)
Supplement: Figure 3—source data 1. — Comparative statistical analysis of H3K4me3/input ChIP-chip enrichment levels in wild-type vs. atf1Δ microarray experiments was performed using the R/Bioconductor limma package (see Materials and Methods). Shown are significantly changed microarray probes, probe chromosomal position, corresponding genomic feature, log2 fold change in wild-type vs. atf1Δ experiments and FDR-adjusted p-value. DOI: http://dx.doi.org/10.7554/eLife.04506.010 [file elife04506s004.xlsx]

## Sheet: Figure_3_Table_S1
ArrayProbeID	ChromosomePosition	Feature	H3K4me3_wt_vs_atf1∆	P.Value
chr1_322_96600_R	chrI:0095851..0095910	isp3 promoter	1.73221	2.13e-05
chr1_323_96900	chrI:0096081..0096140	isp3 promoter	1.68163	1.88e-05
chr1_1520_456000_R	chrI:0455246..0455305		2.28066	5.84e-06
chr1_3582_1074600_R	chrI:1073818..1073877		1.73215	3.68e-05
chr1_3971_1191300	chrI:1190414..1190473	SPNCRNA.168 orf	1.54544	4.35e-05
chr1_11543_3462900	chrI:3462193..3462252	kms1 promoter	1.87873	8.65e-06
chr1_11545_3463500	chrI:3462704..3462763	kms1 promoter	1.4654	5.1e-05
chr1_12568_3770400_f	chrI:3769701..3769760	centromere 1	-2.46933	7.45e-06
chr1_15126_4537800_R	chrI:4542390..4542449		1.39908	6.97e-05
chr1_15958_4787400_R	chrI:4791788..4791847		1.53617	7.06e-05
chr1_17562_5268600_R	chrI:5272963..5273022		-1.69553	6.18e-05
chr1_18434_5530200	chrI:5534664..5534723		-1.59359	2.73e-05
chr2_241_72300	chrII:0072377..0072436		-1.51461	7.24e-05
chr2_668_200400	chrII:0199584..0199643	fbp1 promoter	1.57029	3.01e-05
chr2_669_200700_R	chrII:0199959..0200018	fbp1 promoter	2.01669	5.94e-06
chr2_670_201000	chrII:0200232..0200291	fbp1 promoter	1.74808	1.48e-05
chr2_673_201900_R	chrII:0201181..0201240	SPBC660.05 promoter	2.14974	3.31e-06
chr2_674_202200	chrII:0201443..0201502	SPBC660.05 promoter	2.25144	5.15e-06
chr2_675_202500_R	chrII:0201824..0201883	SPBC660.05 promoter	1.6637	6.79e-05
chr2_682_204600_R	chrII:0203797..0203856	SPBC660.06 promoter	1.62272	4.13e-05
chr2_683_204900	chrII:0204031..0204090	SPBC660.06 promoter	1.54355	3.99e-05
chr2_4084_1225200	chrII:1224394..1224453	SPBC725.10 promoter	1.47483	5.72e-05
chr2_4085_1225500_R	chrII:1224797..1224856	SPBC725.10 promoter	1.55228	4.06e-05
chr2_4086_1225800	chrII:1225050..1225109	SPBC725.10 orf	1.42064	7e-05
chr2_4503_1350900_R	chrII:1350144..1350203		2.07953	3.03e-05
chr2_5162_1548600	chrII:1547763..1547822	atf1 orf	1.89129	1.91e-05
chr2_5165_1549500_R	chrII:1548636..1548695	atf1 orf	2.19924	1.95e-05
chr2_5166_1549800	chrII:1549023..1549082	atf1 orf	2.88477	1.15e-06
chr2_6510_1953000_R	chrII:1951340..1951399	lsd90 promoter	2.2312	9.29e-06
chr2_6511_1953300	chrII:1951663..1951722	lsd90 promoter	1.76971	5.98e-05
chr2_7801_2340300	chrII:2338661..2338720	SPBC24C6.09c promoter	2.0351	5.06e-05
chr2_7803_2340900	chrII:2339228..2339287	SPBC24C6.09c promoter	1.94293	1.26e-05
chr2_13691_4107300_R	chrII:4105516..4105575	mug147 promoter	1.56271	4.83e-05
chr2_13692_4107600	chrII:4105955..4106014	mug147 promoter	1.68525	3.18e-05
chr3_10_3000_f	chrIII:0003055..0003114	SPRRNA.42 upstream	-1.934	3.05e-05
chr3_11_3300_Rf	chrIII:0003301..0003360	SPRRNA.42 upstream	-2.11416	7.19e-05
chr3_12_3600_f	chrIII:0003814..0003873	SPRRNA.42 upstream	-2.103	1.34e-05
chr3_26_7800_f	chrIII:0008010..0008069	SPRRNA.47	-3.19811	6.11e-05
chr3_27_8100_Rf	chrIII:0008285..0008344	SPRRNA.47	-2.61873	6.3e-05
pNSU77_6_1800_f	chrIII:0008440..0008499	SPRRNA.47	-2.92438	3.3e-05
chr3_28_8400_f	chrIII:0008471..0008530	SPRRNA.47	-2.99344	5.71e-06
pNSU77_5_1500_Rf	chrIII:0008589..0008648	SPRRNA.47	-2.94456	1.52e-05
chr3_29_8700_Rf	chrIII:0008798..0008857	SPRRNA.47	-2.97087	4.26e-05
pNSU77_4_1200_f	chrIII:0008844..0008903	SPRRNA.47	-2.60182	6.34e-05
chr3_30_9000_f	chrIII:0009080..0009139	SPRRNA.47	-2.47213	1.43e-05
chr3_41_12300_Rf	chrIII:0012539..0012598	SPRRNA.43 upstream	-1.9985	5.73e-05
chr3_43_12900_Rf	chrIII:0013028..0013087	SPRRNA.43 upstream	-1.9165	7.21e-05
chr3_45_13500_Rf	chrIII:0013601..0013660	SPRRNA.43 upstream	-1.92016	3.47e-05
chr3_48_14400_f	chrIII:0014581..0014640	SPRRNA.43 upstream	-2.00273	2.64e-05
chr3_63_18900_Rf	chrIII:0018904..0018963	SPRRNA.48	-3.06828	3.67e-05
chr3_1773_531900	chrIII:0531970..0532029	mug190 promoter	1.6592	4.81e-05
chr3_1774_532200_R	chrIII:0532410..0532469	mug190 promoter	1.95443	1.06e-05
chr3_1775_532500	chrIII:0532614..0532673	mug190 promoter	1.98427	7.52e-06
chr3_2763_828900_R	chrIII:0829120..0829179	SPCC2H8.02 orf	-1.74424	1.96e-05
chr3_2764_829200	chrIII:0829246..0829305	SPCC2H8.02 orf	-1.48532	7.06e-05
chr3_2765_829500_R	chrIII:0829598..0829657	SPCC2H8.02 orf	-1.59225	2.88e-05
chr3_3219_965700_R	chrIII:0965743..0965802		-1.73118	2.07e-05
chr3_4343_1302900	chrIII:1302109..1302168	srk1 promoter	1.63163	2.6e-05
chr3_4344_1303200_R	chrIII:1302446..1302505	srk1 promoter	1.5193	5.66e-05
chr3_5687_1706100_R	chrIII:1705398..1705457	SPCC191.01 promoter	1.62841	4.34e-05
chr3_5688_1706400	chrIII:1705650..1705709	SPCC191.01 promoter	1.71663	2.85e-05
chr3_8135_2440500_f	chrIII:2439665..2439724	SPRRNA.46	-1.71027	5.8e-05
chr3_8137_2441100_f	chrIII:2440248..2440307	SPRRNA.46	-1.91282	6.87e-05
chr3_8151_2445300_f	chrIII:2444606..2444665	SPRRNA.49	-2.9012	7.17e-05
chr3_8153_2445900_f	chrIII:2445185..2445244	SPRRNA.49	-2.872	3.67e-05
