# Supplementary material for: Heterochromatin assembly and transcriptome repression by Set1 in coordination with a class II histone deacetylase
Source: eLife journal article supplement (doi:10.7554/elife.04506), 2014-12-15
Supplement: supp [file elife_poa_e04506_Figure_1_source_data_1.xlsx]

## Sheet: Figure_1_(a)
Table Field Name	Descriptions
Experiment	indicated deletion mutant vs. wildtype array experiment
ProbeStrand	Sense, Antisense - Set includes genes with differential expression of coding sequence (sense) or antisense
UpDownRegulated	Upregulate, Downregulated, Both - Set includes genes that are upregulated (log2 fold-change vs. wildtype ≥ 0), downregulated (log2 FC ≤ 0), or both
GOCategory	Biological Process (BP), Cellular Component (CC), Molecular Function (MF) - top level GO ontology
GOID	Unique GO category term identifier
Pvalue	Hypergeometric test p value for category term over-enrichment
OddsRatio	Odds ratio for category term over-enrichment
ExpCount	Expected Count of genes associated with the GO category term
Count	Count of genes in the set associated with the GO category term
Size	Count of all S. pombe genes associated with the GO category term
Term	GO category term description
Experiment	ProbeStrand	UpDownRegulated	GO Category	GOID	Pvalue	OddsRatio	ExpCount	Count	Size	Term
sdc1∆	Sense	Upregulated	BP	GO:0033554	1.05105e-18	13.4361	6.68457	34	670	cellular response to stress
sdc1∆	Sense	Upregulated	BP	GO:0051716	2.9781e-18	12.9237	6.90407	34	692	cellular response to stimulus
sdc1∆	Sense	Upregulated	BP	GO:0006950	3.75398e-18	12.812	6.95395	34	697	response to stress
sdc1∆	Sense	Upregulated	BP	GO:0050896	5.97007e-17	11.5363	7.5825	34	760	response to stimulus
sdc1∆	Sense	Upregulated	MF	GO:0016491	3.55926e-11	10.3131	2.69204	18	272	oxidoreductase activity
swd1∆	Sense	Upregulated	BP	GO:0033554	2.16372e-07	7.38349	3.98503	16	670	cellular response to stress
swd1∆	Sense	Upregulated	MF	GO:0016491	2.857e-07	9.95639	1.65664	11	272	oxidoreductase activity
swd1∆	Sense	Upregulated	BP	GO:0051716	3.41115e-07	7.10848	4.11589	16	692	cellular response to stimulus
swd1∆	Sense	Upregulated	BP	GO:0006950	3.77396e-07	7.04846	4.14563	16	697	response to stress
swd1∆	Sense	Upregulated	BP	GO:0050896	1.258e-06	6.36129	4.52034	16	760	response to stimulus
sdc1∆	Sense	Upregulated	BP	GO:0070887	8.04502e-06	9.39147	1.05756	8	106	cellular response to chemical stimulus
set1∆	Antisense	Upregulated	MF	GO:0004012	1.73267e-05	59.0233	0.20099	4	6	phospholipid-translocating ATPase activity
set1∆	Antisense	Upregulated	MF	GO:0015247	1.73267e-05	59.0233	0.20099	4	6	aminophospholipid transporter activity
set1∆	Antisense	Upregulated	MF	GO:0005548	2.60776e-05	21.1821	0.401979	5	12	phospholipid transporter activity
sdc1∆	Sense	Upregulated	MF	GO:0004022	3.11311e-05	79.5612	0.0692805	3	7	alcohol dehydrogenase (NAD) activity
sdc1∆	Sense	Upregulated	BP	GO:0034599	3.53752e-05	11.4738	0.638526	6	64	cellular response to oxidative stress
set1∆	Antisense	Upregulated	BP	GO:0015914	3.83396e-05	18.8323	0.42901	5	13	phospholipid transport
set1∆	Antisense	Upregulated	MF	GO:0005319	4.12309e-05	18.5307	0.435478	5	13	lipid transporter activity
sdc1∆	Sense	Upregulated	BP	GO:0006979	4.22231e-05	11.087	0.65848	6	66	response to oxidative stress
ash2∆	Sense	Upregulated	BP	GO:0006091	4.67944e-05	16.6273	0.430545	5	132	generation of precursor metabolites and energy
swd1∆	Sense	Upregulated	BP	GO:0016052	6.00593e-05	14.4598	0.43419	5	73	carbohydrate catabolic process
swd1∆	Sense	Upregulated	MF	GO:0010181	7.13996e-05	49.0063	0.0852684	3	14	FMN binding
set1∆	Antisense	Upregulated	MF	GO:0032553	9.37412e-05	2.1226	22.0419	40	658	ribonucleotide binding
set1∆	Antisense	Upregulated	MF	GO:0032555	9.37412e-05	2.1226	22.0419	40	658	purine ribonucleotide binding
sdc1∆	Sense	Upregulated	MF	GO:0016206	9.60895e-05	Inf	0.0197944	2	2	catechol O-methyltransferase activity
swd1∆	Sense	Upregulated	BP	GO:0006091	0.000103003	9.62857	0.785111	6	132	generation of precursor metabolites and energy
swd1∆	Sense	Upregulated	MF	GO:0048029	0.000108939	41.4509	0.0974496	3	16	monosaccharide binding
set1∆	Sense	Upregulated	BP	GO:0051716	0.000131571	3.16196	7.83346	19	692	cellular response to stimulus
sdc1∆	Sense	Upregulated	BP	GO:0042221	0.000132185	6.15725	1.55641	8	156	response to chemical stimulus
set1∆	Antisense	Upregulated	MF	GO:0017111	0.000134794	2.61547	10.016	23	299	nucleoside-triphosphatase activity
set1∆	Antisense	Upregulated	MF	GO:0016462	0.000141439	2.55085	10.7195	24	320	pyrophosphatase activity
set1∆	Antisense	Upregulated	MF	GO:0016818	0.000141439	2.55085	10.7195	24	320	hydrolase activity, acting on acid anhydrides, in phosphorus-containing anhydrides
set1∆	Sense	Upregulated	BP	GO:0050896	0.000148063	3.05821	8.60322	20	760	response to stimulus
set1∆	Antisense	Upregulated	MF	GO:0016817	0.000148456	2.54173	10.753	24	321	hydrolase activity, acting on acid anhydrides
swd1∆	Sense	Upregulated	BP	GO:0046164	0.000166047	17.2963	0.285495	4	48	alcohol catabolic process
set1∆	Sense	Downregulated	BP	GO:0042026	0.000168802	172.9	0.0211051	2	5	protein refolding
sdc1∆	Sense	Upregulated	BP	GO:0006007	0.000174062	17.1167	0.289332	4	29	glucose catabolic process
set1∆	Sense	Downregulated	BP	GO:0055085	0.000191771	8.98197	0.9033	6	214	transmembrane transport
set1∆	Antisense	Upregulated	MF	GO:0016887	0.000203764	2.80534	7.67111	19	229	ATPase activity
ash2∆	Sense	Upregulated	MF	GO:0004022	0.000205	139.52	0.0226494	2	7	alcohol dehydrogenase (NAD) activity
set1∆	Antisense	Upregulated	BP	GO:0019219	0.000228006	2.3366	13.1673	27	399	regulation of nucleobase-containing compound metabolic process
sdc1∆	Sense	Upregulated	MF	GO:0016616	0.000260923	10.1418	0.583936	5	59	oxidoreductase activity, acting on the CH-OH group of donors, NAD or NADP as acceptor
swd1∆	Sense	Upregulated	MF	GO:0003824	0.000266879	3.76181	11.8706	22	1949	catalytic activity
set1∆	Sense	Upregulated	CC	GO:0005886	0.000272723	4.85389	2.18023	9	188	plasma membrane
set1∆	Sense	Upregulated	BP	GO:0033554	0.000279067	3.03075	7.58442	18	670	cellular response to stress
set1∆	Antisense	Upregulated	BP	GO:0051171	0.000279607	2.30314	13.3323	27	404	regulation of nitrogen compound metabolic process
sdc1∆	Sense	Downregulated	CC	GO:0005886	0.000280308	18.3551	0.357414	4	188	plasma membrane
set1∆	Antisense	Upregulated	MF	GO:0017076	0.000309051	1.98608	23.2813	40	695	purine nucleotide binding
swd1∆	Sense	Upregulated	CC	GO:0005829	0.000311136	3.90013	13.9741	24	2297	cytosol
sdc1∆	Sense	Upregulated	BP	GO:0019320	0.000327577	14.25	0.339217	4	34	hexose catabolic process
set1∆	Antisense	Upregulated	BP	GO:0045332	0.00033638	44.716	0.165004	3	5	phospholipid translocation
swd3∆	Antisense	Upregulated	CC	GO:0030478	0.000380228	Inf	0.000380228	1	1	actin cap
ash2∆	Sense	Downregulated	MF	GO:0004352	0.000380662	Inf	0.000380662	1	1	glutamate dehydrogenase (NAD+) activity
swd1∆	Antisense	Downregulated	MF	GO:0003864	0.000380662	Inf	0.000380662	1	1	3-methyl-2-oxobutanoate hydroxymethyltransferase activity
swd3∆	Antisense	Upregulated	MF	GO:0004357	0.000380662	Inf	0.000380662	1	1	glutamate-cysteine ligase activity
swd3∆	Antisense	Upregulated	MF	GO:0046911	0.000380662	Inf	0.000380662	1	1	metal chelating activity
set1∆	Antisense	Upregulated	BP	GO:0006869	0.000382605	10.0299	0.660015	5	20	lipid transport
sdc1∆	Sense	Upregulated	MF	GO:0016614	0.000382821	9.27335	0.633422	5	64	oxidoreductase activity, acting on CH-OH group of donors
ash2∆	Sense	Downregulated	BP	GO:0019551	0.00038373	Inf	0.00038373	1	1	glutamate catabolic process to 2-oxoglutarate
set1∆	Sense	Upregulated	MF	GO:0051184	0.000392118	26.8086	0.150933	3	13	cofactor transporter activity
ash2∆	Sense	Upregulated	BP	GO:0046164	0.000455401	24.5238	0.156562	3	48	alcohol catabolic process
set1∆	Sense	Upregulated	BP	GO:0006950	0.000457662	2.89278	7.89006	18	697	response to stress
sdc1∆	Sense	Upregulated	CC	GO:0005829	0.000470203	2.68139	22.708	35	2297	cytosol
shg1∆	Sense	Upregulated	MF	GO:0003729	0.00049805	89.9828	0.0354016	2	31	mRNA binding
swd3∆	Sense	Upregulated	MF	GO:0015171	0.000530983	86.9667	0.0365436	2	32	amino acid transmembrane transporter activity
sdc1∆	Sense	Upregulated	MF	GO:0016903	0.00056392	22.688	0.168253	3	17	oxidoreductase activity, acting on the aldehyde or oxo group of donors
ash2∆	Antisense	Upregulated	CC	GO:0055087	0.000570342	Inf	0.000570342	1	3	Ski complex
sdc1∆	Sense	Upregulated	BP	GO:0006096	0.000577208	22.5044	0.169609	3	17	glycolysis
swd1∆	Sense	Upregulated	BP	GO:0006007	0.000627105	21.2431	0.172487	3	29	glucose catabolic process
set1∆	Antisense	Upregulated	BP	GO:0007131	0.000629311	4.77188	1.94705	8	59	reciprocal meiotic recombination
set1∆	Sense	Downregulated	MF	GO:0022857	0.000646617	7.05682	1.13057	6	270	transmembrane transporter activity
spp1∆	Antisense	Upregulated	CC	GO:0031224	0.000652313	2.44003	12.4452	24	922	intrinsic to membrane
set1∆	Antisense	Upregulated	BP	GO:0034204	0.000656439	29.8047	0.198005	3	6	lipid translocation
set1∆	Antisense	Upregulated	CC	GO:0043234	0.000663548	1.72813	41.9924	61	1255	protein complex
swd3∆	Sense	Upregulated	MF	GO:0046943	0.000673062	76.6765	0.0411115	2	36	carboxylic acid transmembrane transporter activity
swd3∆	Sense	Upregulated	MF	GO:0005342	0.000711161	74.4714	0.0422535	2	37	organic acid transmembrane transporter activity
swd1∆	Sense	Upregulated	MF	GO:0004022	0.00074055	69.56	0.0426342	2	7	alcohol dehydrogenase (NAD) activity
sdc1∆	Sense	Upregulated	BP	GO:0046365	0.000745408	11.2325	0.419033	4	42	monosaccharide catabolic process
swd3∆	Antisense	Upregulated	CC	GO:0017109	0.000760384	5257	0.000760456	1	2	glutamate-cysteine ligase complex
swd1∆	Antisense	Downregulated	MF	GO:0019992	0.000761252	5251	0.000761325	1	2	diacylglycerol binding
shg1∆	Sense	Downregulated	BP	GO:0000722	0.00076746	Inf	0.00076746	1	4	telomere maintenance via recombination
swd3∆	Sense	Upregulated	BP	GO:0043458	0.00076746	Inf	0.00076746	1	1	ethanol biosynthetic process involved in glucose fermentation to ethanol
swd3∆	Sense	Upregulated	BP	GO:0006115	0.00076746	Inf	0.00076746	1	1	ethanol biosynthetic process
swd3∆	Sense	Upregulated	BP	GO:0034309	0.00076746	Inf	0.00076746	1	1	primary alcohol biosynthetic process
sdc1∆	Sense	Downregulated	CC	GO:0044459	0.000791872	22.0714	0.195817	3	103	plasma membrane part
swd1∆	Sense	Upregulated	MF	GO:0030246	0.000821779	19.1897	0.188809	3	31	carbohydrate binding
set1∆	Sense	Downregulated	BP	GO:0006457	0.000891576	11.085	0.447429	4	106	protein folding
set1∆	Antisense	Upregulated	BP	GO:0065007	0.000903332	1.71054	41.647	60	1262	biological regulation
sdc1∆	Sense	Upregulated	BP	GO:0042026	0.000957836	68.76	0.0498849	2	5	protein refolding
swd3∆	Sense	Upregulated	MF	GO:0005275	0.000961289	63.5	0.0491054	2	43	amine transmembrane transporter activity
set1∆	Antisense	Upregulated	MF	GO:0016879	0.000977532	3.0118	4.82375	13	144	ligase activity, forming carbon-nitrogen bonds
sdc1∆	Sense	Downregulated	BP	GO:0046942	0.000978985	56.8901	0.04835	2	28	carboxylic acid transport
swd1∆	Sense	Upregulated	BP	GO:0019320	0.00100652	17.7995	0.202226	3	34	hexose catabolic process
shg1∆	Sense	Upregulated	BP	GO:0007126	0.00100698	25.5612	0.229087	3	199	meiosis
shg1∆	Sense	Upregulated	BP	GO:0051327	0.00100698	25.5612	0.229087	3	199	M phase of meiotic cell cycle
set1∆	Antisense	Upregulated	BP	GO:0006355	0.00102886	2.26902	10.8243	22	328	regulation of transcription, DNA-dependent
spp1∆	Antisense	Upregulated	MF	GO:0051377	0.00103199	76.2059	0.0532927	2	4	mannose-ethanolamine phosphotransferase activity
sdc1∆	Sense	Downregulated	BP	GO:0015849	0.00105056	54.7725	0.0500767	2	29	organic acid transport
swd2∆	Sense	Upregulated	BP	GO:0006007	0.00105056	54.7725	0.0500767	2	29	glucose catabolic process
shg1∆	Sense	Upregulated	BP	GO:0051321	0.00105205	25.1608	0.23254	3	202	meiotic cell cycle
set1∆	Sense	Upregulated	MF	GO:0005215	0.00109598	3.41841	3.77332	11	325	transporter activity
set1∆	Sense	Upregulated	CC	GO:0044459	0.00113087	5.73796	1.19449	6	103	plasma membrane part
ash2∆	Sense	Downregulated	MF	GO:0016639	0.00114177	2625	0.00114199	1	3	oxidoreductase activity, acting on the CH-NH2 group of donors, NAD or NADP as acceptor
swd2∆	Sense	Downregulated	MF	GO:0015343	0.00114177	2625	0.00114199	1	3	siderophore transmembrane transporter activity
swd2∆	Sense	Downregulated	MF	GO:0042927	0.00114177	2625	0.00114199	1	3	siderophore transporter activity
swd3∆	Sense	Downregulated	MF	GO:0015343	0.00114177	2625	0.00114199	1	3	siderophore transmembrane transporter activity
swd3∆	Sense	Downregulated	MF	GO:0042927	0.00114177	2625	0.00114199	1	3	siderophore transporter activity
set1∆	Antisense	Upregulated	MF	GO:0000166	0.00114423	1.83645	24.8222	40	741	nucleotide binding
ash2∆	Sense	Downregulated	BP	GO:0006106	0.00115097	2604	0.00115119	1	3	fumarate metabolic process
swd3∆	Antisense	Upregulated	BP	GO:0006750	0.00115097	2604	0.00115119	1	3	glutathione biosynthetic process
swd3∆	Sense	Upregulated	MF	GO:0022891	0.00115136	24.3527	0.239817	3	210	substrate-specific transmembrane transporter activity
set1∆	Antisense	Upregulated	MF	GO:0005524	0.00119493	1.95204	18.4576	32	551	ATP binding
set1∆	Antisense	Upregulated	MF	GO:0032559	0.00123194	1.94786	18.4911	32	552	adenyl ribonucleotide binding
sdc1∆	Sense	Upregulated	BP	GO:0006006	0.00123991	9.68939	0.478895	4	48	glucose metabolic process
sdc1∆	Sense	Upregulated	BP	GO:0046164	0.00123991	9.68939	0.478895	4	48	alcohol catabolic process
ash2∆	Sense	Upregulated	MF	GO:0016491	0.00132567	7.75593	0.880091	5	272	oxidoreductase activity
shg1∆	Sense	Downregulated	MF	GO:0043140	0.00133232	Inf	0.00133232	1	7	ATP-dependent 3'-5' DNA helicase activity
shg1∆	Sense	Downregulated	MF	GO:0043138	0.00133232	Inf	0.00133232	1	7	3'-5' DNA helicase activity
set1∆	Antisense	Upregulated	MF	GO:0016881	0.00139663	3.22006	3.8188	11	114	acid-amino acid ligase activity
set1∆	Antisense	Upregulated	BP	GO:0051252	0.00141176	2.20747	11.0883	22	336	regulation of RNA metabolic process
swd2∆	Sense	Upregulated	BP	GO:0019320	0.00144514	46.1696	0.0587107	2	34	hexose catabolic process
set1∆	Sense	Downregulated	MF	GO:0051082	0.00145215	15.7287	0.230301	3	55	unfolded protein binding
set1∆	Antisense	Upregulated	BP	GO:0050794	0.00145468	1.70994	35.3438	52	1071	regulation of cellular process
spp1∆	Antisense	Upregulated	CC	GO:0016021	0.00145535	2.30827	12.3508	23	915	integral to membrane
set1∆	Antisense	Upregulated	BP	GO:0045934	0.00146037	2.64042	6.30315	15	191	negative regulation of nucleobase-containing compound metabolic process
set1∆	Antisense	Upregulated	BP	GO:0051172	0.00146037	2.64042	6.30315	15	191	negative regulation of nitrogen compound metabolic process
swd1∆	Antisense	Downregulated	MF	GO:0016742	0.00152221	1749.67	0.00152265	1	4	hydroxymethyl-, formyl- and related transferase activity
ash2∆	Antisense	Downregulated	MF	GO:0019992	0.00152221	1749.67	0.00152265	1	2	diacylglycerol binding
sdc1∆	Antisense	Upregulated	MF	GO:0008892	0.00152265	Inf	0.00152265	1	1	guanine deaminase activity
sdc1∆	Antisense	Upregulated	MF	GO:0008802	0.00152265	Inf	0.00152265	1	1	betaine-aldehyde dehydrogenase activity
swd2∆	Sense	Downregulated	BP	GO:0015891	0.00153448	1735.67	0.00153492	1	4	siderophore transport
swd3∆	Sense	Downregulated	BP	GO:0015891	0.00153448	1735.67	0.00153492	1	4	siderophore transport
sdc1∆	Antisense	Upregulated	BP	GO:0046098	0.00153492	Inf	0.00153492	1	1	guanine metabolic process
ash2∆	Sense	Upregulated	BP	GO:0016052	0.00155698	15.6888	0.238104	3	73	carbohydrate catabolic process
ash2∆	Sense	Upregulated	BP	GO:0006066	0.00155941	9.80915	0.528396	4	162	alcohol metabolic process
set1∆	Sense	Upregulated	CC	GO:0005887	0.00157157	9.05088	0.510266	4	44	integral to plasma membrane
spp1∆	Antisense	Upregulated	BP	GO:0015833	0.00168355	51.1443	0.0661934	2	5	peptide transport
swd2∆	Sense	Upregulated	MF	GO:0022857	0.00168908	10.6917	0.565284	4	270	transmembrane transporter activity
set1∆	Sense	Downregulated	MF	GO:0005215	0.00171169	5.77547	1.36087	6	325	transporter activity
ash2∆	Antisense	Upregulated	BP	GO:0017148	0.00172678	Inf	0.00172678	1	9	negative regulation of translation
sdc1∆	Sense	Downregulated	BP	GO:0019551	0.00172678	Inf	0.00172678	1	1	glutamate catabolic process to 2-oxoglutarate
swd2∆	Sense	Upregulated	BP	GO:0043458	0.00172678	Inf	0.00172678	1	1	ethanol biosynthetic process involved in glucose fermentation to ethanol
swd2∆	Sense	Upregulated	BP	GO:0006115	0.00172678	Inf	0.00172678	1	1	ethanol biosynthetic process
swd2∆	Sense	Upregulated	BP	GO:0034309	0.00172678	Inf	0.00172678	1	1	primary alcohol biosynthetic process
set1∆	Antisense	Upregulated	BP	GO:0010556	0.00182799	2.02716	14.2893	26	433	regulation of macromolecule biosynthetic process
set1∆	Sense	Upregulated	BP	GO:0006012	0.00183546	45.1667	0.0679202	2	6	galactose metabolic process
set1∆	Sense	Upregulated	BP	GO:0051180	0.00183546	45.1667	0.0679202	2	6	vitamin transport
sdc1∆	Sense	Upregulated	BP	GO:0006091	0.00184278	5.21118	1.31696	6	132	generation of precursor metabolites and energy
swd1∆	Sense	Upregulated	BP	GO:0046365	0.00186981	14.1264	0.249808	3	42	monosaccharide catabolic process
set1∆	Antisense	Upregulated	MF	GO:0016874	0.00188629	2.56473	6.46517	15	193	ligase activity
ash2∆	Sense	Downregulated	CC	GO:0048189	0.00190042	1313.5	0.00190114	1	5	Lid2 complex
swd1∆	Sense	Downregulated	MF	GO:0004151	0.00190259	1312	0.00190331	1	2	dihydroorotase activity
sdc1∆	Sense	Downregulated	MF	GO:0004352	0.00190331	Inf	0.00190331	1	1	glutamate dehydrogenase (NAD+) activity
swd2∆	Sense	Upregulated	MF	GO:0015171	0.00191022	38.6148	0.0669966	2	32	amino acid transmembrane transporter activity
ash2∆	Sense	Downregulated	BP	GO:0006538	0.00191791	1301.5	0.00191865	1	5	glutamate catabolic process
swd2∆	Sense	Downregulated	BP	GO:0033214	0.00191791	1301.5	0.00191865	1	5	iron assimilation by chelation and transport
swd3∆	Sense	Downregulated	BP	GO:0033214	0.00191791	1301.5	0.00191865	1	5	iron assimilation by chelation and transport
set1∆	Antisense	Upregulated	BP	GO:0007154	0.00194346	1.99125	15.1144	27	458	cell communication
spp1∆	Sense	Upregulated	BP	GO:0007126	0.00202034	9.32774	0.572717	4	199	meiosis
spp1∆	Sense	Upregulated	BP	GO:0051327	0.00202034	9.32774	0.572717	4	199	M phase of meiotic cell cycle
swd2∆	Sense	Upregulated	MF	GO:0004332	0.00209364	Inf	0.00209364	1	1	fructose-bisphosphate aldolase activity
spp1∆	Sense	Upregulated	BP	GO:0051321	0.00213488	9.1809	0.581351	4	202	meiotic cell cycle
set1∆	Antisense	Upregulated	BP	GO:0000279	0.00213919	2.05875	12.9363	24	392	M phase
shg1∆	Antisense	Upregulated	CC	GO:0031224	0.00218275	3.35178	5.08327	12	922	intrinsic to membrane
set1∆	Antisense	Upregulated	BP	GO:0007126	0.00219655	2.52146	6.56715	15	199	meiosis
set1∆	Antisense	Upregulated	BP	GO:0051327	0.00219655	2.52146	6.56715	15	199	M phase of meiotic cell cycle
swd2∆	Sense	Upregulated	BP	GO:0046365	0.00220208	36.8786	0.0725249	2	42	monosaccharide catabolic process
swd3∆	Sense	Upregulated	MF	GO:0022892	0.00221576	19.1846	0.300343	3	263	substrate-specific transporter activity
sdc1∆	Sense	Downregulated	MF	GO:0005215	0.00223994	10.2243	0.618576	4	325	transporter activity
set1∆	Antisense	Upregulated	BP	GO:0050789	0.00227264	1.66667	36.0368	52	1092	regulation of biological process
spp1∆	Antisense	Upregulated	CC	GO:0010339	0.00227888	13.4221	0.269962	3	20	external side of cell wall
sdc1∆	Antisense	Downregulated	MF	GO:0046557	0.00228267	874.667	0.00228397	1	3	glucan endo-1,6-beta-glucosidase activity
swd1∆	Antisense	Downregulated	MF	GO:0004372	0.00228289	1049.4	0.00228397	1	6	glycine hydroxymethyltransferase activity
swd3∆	Sense	Upregulated	BP	GO:0019660	0.00230105	867.667	0.00230238	1	3	glycolytic fermentation
swd3∆	Sense	Upregulated	BP	GO:0019655	0.00230105	867.667	0.00230238	1	3	glucose catabolic process to ethanol
swd3∆	Sense	Upregulated	BP	GO:0000955	0.00230105	867.667	0.00230238	1	3	amino acid catabolic process via Ehrlich pathway
swd3∆	Sense	Upregulated	BP	GO:0000947	0.00230105	867.667	0.00230238	1	3	amino acid catabolic process to alcohol via Ehrlich pathway
ash2∆	Sense	Downregulated	BP	GO:0006103	0.00230127	1041	0.00230238	1	6	2-oxoglutarate metabolic process
shg1∆	Sense	Upregulated	BP	GO:0000733	0.00230127	1041	0.00230238	1	2	DNA strand renaturation
shg1∆	Sense	Upregulated	BP	GO:0033621	0.00230127	1041	0.00230238	1	2	nuclear-transcribed mRNA catabolic process, meiosis-specific transcripts
swd1∆	Antisense	Downregulated	BP	GO:0015940	0.00230127	1041	0.00230238	1	6	pantothenate biosynthetic process
swd1∆	Antisense	Downregulated	BP	GO:0015939	0.00230127	1041	0.00230238	1	6	pantothenate metabolic process
swd3∆	Sense	Upregulated	MF	GO:0022857	0.00239072	18.6554	0.308337	3	270	transmembrane transporter activity
swd1∆	Sense	Upregulated	BP	GO:0006066	0.00240667	6.15385	0.963546	5	162	alcohol metabolic process
swd2∆	Sense	Upregulated	MF	GO:0046943	0.00241522	34.0458	0.0753711	2	36	carboxylic acid transmembrane transporter activity
set1∆	Antisense	Downregulated	MF	GO:0051575	0.00247431	Inf	0.00247431	1	1	5'-deoxyribose-5-phosphate lyase activity
set1∆	Antisense	Downregulated	MF	GO:0042800	0.00247431	Inf	0.00247431	1	1	histone methyltransferase activity (H3-K4 specific)
set1∆	Antisense	Upregulated	BP	GO:0051321	0.00254249	2.47948	6.66616	15	202	meiotic cell cycle
swd2∆	Sense	Upregulated	MF	GO:0005342	0.00255032	33.0667	0.0774648	2	37	organic acid transmembrane transporter activity
set1∆	Sense	Upregulated	BP	GO:0008655	0.00255095	36.1263	0.0792402	2	7	pyrimidine-containing compound salvage
set1∆	Antisense	Upregulated	BP	GO:0006311	0.00256181	14.8935	0.297007	3	9	meiotic gene conversion
set1∆	Sense	Upregulated	BP	GO:0055085	0.00257863	3.76699	2.42249	8	214	transmembrane transport
sdc1∆	Sense	Upregulated	MF	GO:0008171	0.00258983	34.64	0.0791778	2	8	O-methyltransferase activity
sdc1∆	Sense	Upregulated	MF	GO:0004601	0.00258983	34.64	0.0791778	2	8	peroxidase activity
sdc1∆	Sense	Upregulated	MF	GO:0004364	0.00258983	34.64	0.0791778	2	8	glutathione transferase activity
sdc1∆	Sense	Upregulated	MF	GO:0016684	0.00258983	34.64	0.0791778	2	8	oxidoreductase activity, acting on peroxide as acceptor
swd3∆	Antisense	Upregulated	BP	GO:0043043	0.00268456	867.333	0.00268611	1	7	peptide biosynthetic process
swd1∆	Sense	Upregulated	BP	GO:0006006	0.00274997	12.2286	0.285495	3	48	glucose metabolic process
set1∆	Antisense	Upregulated	BP	GO:0006310	0.00278909	3.11287	3.56408	10	108	DNA recombination
swd1∆	Sense	Downregulated	MF	GO:0015343	0.00285279	655.875	0.00285497	1	3	siderophore transmembrane transporter activity
swd1∆	Sense	Downregulated	MF	GO:0042927	0.00285279	655.875	0.00285497	1	3	siderophore transporter activity
spp1∆	Sense	Upregulated	MF	GO:0004328	0.00285497	Inf	0.00285497	1	1	formamidase activity
swd1∆	Antisense	Upregulated	MF	GO:0017124	0.00285497	Inf	0.00285497	1	1	SH3 domain binding
swd1∆	Antisense	Upregulated	MF	GO:0008802	0.00285497	Inf	0.00285497	1	1	betaine-aldehyde dehydrogenase activity
swd2∆	Sense	Upregulated	BP	GO:0006006	0.00286947	32.0311	0.0828856	2	48	glucose metabolic process
swd2∆	Sense	Upregulated	BP	GO:0046164	0.00286947	32.0311	0.0828856	2	48	alcohol catabolic process
swd1∆	Antisense	Upregulated	BP	GO:0035195	0.00287797	Inf	0.00287797	1	1	gene silencing by miRNA
swd1∆	Antisense	Upregulated	BP	GO:0035196	0.00287797	Inf	0.00287797	1	1	production of miRNAs involved in gene silencing by miRNA
swd1∆	Antisense	Upregulated	BP	GO:0032871	0.00287797	Inf	0.00287797	1	1	regulation of karyogamy
set1∆	Sense	Upregulated	CC	GO:0031226	0.00292512	7.5307	0.603042	4	52	intrinsic to plasma membrane
set1∆	Antisense	Upregulated	BP	GO:0060255	0.00293489	1.90406	16.3354	28	495	regulation of macromolecule metabolic process
sdc1∆	Sense	Downregulated	CC	GO:0005887	0.00294936	31	0.0836502	2	44	integral to plasma membrane
sdc1∆	Sense	Upregulated	BP	GO:0019318	0.00302281	7.46053	0.608596	4	61	hexose metabolic process
ash2∆	Sense	Downregulated	CC	GO:0048188	0.0030398	750.143	0.00304183	1	8	Set1C/COMPASS complex
ash2∆	Sense	Downregulated	CC	GO:0035097	0.0030398	750.143	0.00304183	1	8	histone methyltransferase complex
swd2∆	Sense	Downregulated	CC	GO:0048188	0.0030398	750.143	0.00304183	1	8	Set1C/COMPASS complex
swd2∆	Sense	Downregulated	CC	GO:0035097	0.0030398	750.143	0.00304183	1	8	histone methyltransferase complex
swd3∆	Sense	Downregulated	CC	GO:0048188	0.0030398	750.143	0.00304183	1	8	Set1C/COMPASS complex
swd3∆	Sense	Downregulated	CC	GO:0035097	0.0030398	750.143	0.00304183	1	8	histone methyltransferase complex
swd2∆	Antisense	Upregulated	CC	GO:0030478	0.00304183	Inf	0.00304183	1	1	actin cap
sdc1∆	Antisense	Downregulated	MF	GO:0004338	0.00304269	583	0.0030453	1	4	glucan exo-1,3-beta-glucosidase activity
swd2∆	Antisense	Upregulated	MF	GO:0004034	0.0030453	Inf	0.0030453	1	1	aldose 1-epimerase activity
swd2∆	Antisense	Upregulated	MF	GO:0004357	0.0030453	Inf	0.0030453	1	1	glutamate-cysteine ligase activity
swd2∆	Antisense	Upregulated	MF	GO:0046911	0.0030453	Inf	0.0030453	1	1	metal chelating activity
sdc1∆	Antisense	Upregulated	BP	GO:0042759	0.00306778	743.286	0.00306984	1	2	long-chain fatty acid biosynthetic process
sdc1∆	Antisense	Upregulated	BP	GO:0010106	0.00306778	743.286	0.00306984	1	2	cellular response to iron ion starvation
sdc1∆	Antisense	Upregulated	BP	GO:0033217	0.00306778	743.286	0.00306984	1	2	regulation of transcription from RNA polymerase II promoter in response to iron ion starvation
swd2∆	Sense	Downregulated	BP	GO:0033212	0.00306778	743.286	0.00306984	1	8	iron assimilation
swd3∆	Sense	Downregulated	BP	GO:0033212	0.00306778	743.286	0.00306984	1	8	iron assimilation
swd2∆	Antisense	Upregulated	BP	GO:0000354	0.00306984	Inf	0.00306984	1	1	cis assembly of pre-catalytic spliceosome
swd2∆	Antisense	Upregulated	BP	GO:0035195	0.00306984	Inf	0.00306984	1	1	gene silencing by miRNA
swd2∆	Antisense	Upregulated	BP	GO:0035196	0.00306984	Inf	0.00306984	1	1	production of miRNAs involved in gene silencing by miRNA
shg1∆	Antisense	Upregulated	CC	GO:0044425	0.0031311	3.10472	6.05361	13	1098	membrane part
set1∆	Antisense	Upregulated	BP	GO:0031326	0.00323227	1.93376	14.8833	26	451	regulation of cellular biosynthetic process
ash2∆	Sense	Upregulated	MF	GO:0004065	0.00323563	Inf	0.00323563	1	1	arylsulfatase activity
ash2∆	Sense	Upregulated	MF	GO:0008484	0.00323563	Inf	0.00323563	1	1	sulfuric ester hydrolase activity
spp1∆	Antisense	Upregulated	BP	GO:0022610	0.00325347	11.6432	0.30449	3	23	biological adhesion
spp1∆	Antisense	Upregulated	BP	GO:0007155	0.00325347	11.6432	0.30449	3	23	cell adhesion
ash2∆	Sense	Upregulated	BP	GO:0043458	0.0032617	Inf	0.0032617	1	1	ethanol biosynthetic process involved in glucose fermentation to ethanol
ash2∆	Sense	Upregulated	BP	GO:0006115	0.0032617	Inf	0.0032617	1	1	ethanol biosynthetic process
ash2∆	Sense	Upregulated	BP	GO:0034309	0.0032617	Inf	0.0032617	1	1	primary alcohol biosynthetic process
set1∆	Antisense	Upregulated	MF	GO:0000014	0.00327397	58.3563	0.100495	2	3	single-stranded DNA endodeoxyribonuclease activity
set1∆	Antisense	Upregulated	MF	GO:0004040	0.00327397	58.3563	0.100495	2	3	amidase activity
set1∆	Antisense	Upregulated	BP	GO:0009889	0.0033318	1.92881	14.9163	26	452	regulation of biosynthetic process
swd2∆	Sense	Upregulated	MF	GO:0005215	0.00334985	8.7619	0.680434	4	325	transporter activity
set1∆	Sense	Upregulated	MF	GO:0016810	0.00337234	7.21825	0.626951	4	54	hydrolase activity, acting on carbon-nitrogen (but not peptide) bonds
ash2∆	Sense	Upregulated	BP	GO:0033554	0.00340422	4.78492	2.18534	7	670	cellular response to stress
swd3∆	Sense	Upregulated	MF	GO:0015204	0.0034227	524.6	0.00342596	1	3	urea transmembrane transporter activity
swd3∆	Sense	Upregulated	MF	GO:0042887	0.0034227	524.6	0.00342596	1	3	amide transmembrane transporter activity
set1∆	Antisense	Upregulated	BP	GO:0006200	0.00343354	2.47796	6.20414	14	188	ATP catabolic process
swd2∆	Sense	Upregulated	MF	GO:0005275	0.00343423	28.1951	0.0900266	2	43	amine transmembrane transporter activity
shg1∆	Sense	Upregulated	BP	GO:0043489	0.00345026	520.4	0.00345357	1	3	RNA stabilization
shg1∆	Sense	Upregulated	BP	GO:0048255	0.00345026	520.4	0.00345357	1	3	mRNA stabilization
shg1∆	Sense	Upregulated	BP	GO:0045002	0.00345026	520.4	0.00345357	1	3	double-strand break repair via single-strand annealing
sdc1∆	Sense	Downregulated	BP	GO:0042883	0.00345092	650.25	0.00345357	1	2	cysteine transport
sdc1∆	Sense	Downregulated	BP	GO:0042886	0.00345092	650.25	0.00345357	1	2	amide transport
sdc1∆	Sense	Downregulated	BP	GO:0015878	0.00345092	650.25	0.00345357	1	2	biotin transport
swd3∆	Antisense	Upregulated	BP	GO:0006749	0.00345092	650.25	0.00345357	1	9	glutathione metabolic process
shg1∆	Sense	Downregulated	BP	GO:0006312	0.00345357	Inf	0.00345357	1	18	mitotic recombination
spp1∆	Antisense	Upregulated	BP	GO:0043043	0.00347528	30.6746	0.0926708	2	7	peptide biosynthetic process
spp1∆	Antisense	Upregulated	CC	GO:0044425	0.00348974	2.08477	14.8209	25	1098	membrane part
set1∆	Antisense	Upregulated	BP	GO:0006139	0.00350366	1.56767	50.3262	67	1525	nucleobase-containing compound metabolic process
set1∆	Antisense	Upregulated	MF	GO:0030554	0.00352665	1.80371	19.7305	32	589	adenyl nucleotide binding
set1∆	Sense	Upregulated	MF	GO:0051183	0.00354971	29.3051	0.0928816	2	8	vitamin transporter activity
set1∆	Sense	Upregulated	MF	GO:0022857	0.00360272	3.27056	3.13475	9	270	transmembrane transporter activity
set1∆	Antisense	Upregulated	MF	GO:0001883	0.00362114	1.80008	19.764	32	590	purine nucleoside binding
set1∆	Sense	Downregulated	MF	GO:0032553	0.00370169	4.02813	2.75523	8	658	ribonucleotide binding
set1∆	Sense	Downregulated	MF	GO:0032555	0.00370169	4.02813	2.75523	8	658	purine ribonucleotide binding
swd1∆	Sense	Downregulated	MF	GO:0016812	0.00380228	437.167	0.00380662	1	4	hydrolase activity, acting on carbon-nitrogen (but not peptide) bonds, in cyclic amides
swd2∆	Sense	Downregulated	MF	GO:0005381	0.00380336	582.556	0.00380662	1	10	iron ion transmembrane transporter activity
swd3∆	Sense	Downregulated	MF	GO:0005381	0.00380336	582.556	0.00380662	1	10	iron ion transmembrane transporter activity
sdc1∆	Sense	Downregulated	MF	GO:0033229	0.00380336	582.556	0.00380662	1	2	cysteine transmembrane transporter activity
sdc1∆	Sense	Downregulated	MF	GO:0015225	0.00380336	582.556	0.00380662	1	2	biotin transporter activity
swd1∆	Sense	Downregulated	BP	GO:0015891	0.00383288	433.667	0.0038373	1	4	siderophore transport
sdc1∆	Antisense	Downregulated	BP	GO:0070880	0.00383288	433.667	0.0038373	1	5	fungal-type cell wall beta-glucan biosynthetic process
spp1∆	Antisense	Upregulated	BP	GO:0008610	0.00384235	3.86423	2.02552	7	153	lipid biosynthetic process
ash2∆	Sense	Upregulated	BP	GO:0006007	0.00386074	25.521	0.0945894	2	29	glucose catabolic process
shg1∆	Antisense	Upregulated	BP	GO:0032319	0.00386074	25.521	0.0945894	2	17	regulation of Rho GTPase activity
spp1∆	Antisense	Upregulated	CC	GO:0044462	0.00389274	10.8571	0.323954	3	24	external encapsulating structure part
spp1∆	Antisense	Upregulated	CC	GO:0044426	0.00389274	10.8571	0.323954	3	24	cell wall part
swd3∆	Sense	Upregulated	MF	GO:0005215	0.00407651	15.2981	0.371146	3	325	transporter activity
sdc1∆	Sense	Downregulated	CC	GO:0031226	0.00410065	26	0.0988593	2	52	intrinsic to plasma membrane
ash2∆	Sense	Upregulated	BP	GO:0051716	0.00410156	4.60876	2.2571	7	692	cellular response to stimulus
set1∆	Antisense	Upregulated	MF	GO:0042623	0.00411207	2.51636	5.66121	13	169	ATPase activity, coupled
set1∆	Antisense	Upregulated	MF	GO:0001882	0.00412681	1.78212	19.9315	32	595	nucleoside binding
set1∆	Antisense	Upregulated	BP	GO:0010558	0.00415371	2.42028	6.33615	14	192	negative regulation of macromolecule biosynthetic process
set1∆	Sense	Downregulated	MF	GO:0042800	0.00418729	Inf	0.00418729	1	1	histone methyltransferase activity (H3-K4 specific)
set1∆	Sense	Downregulated	BP	GO:0043335	0.00422103	Inf	0.00422103	1	1	protein unfolding
set1∆	Sense	Downregulated	BP	GO:0032056	0.00422103	Inf	0.00422103	1	1	positive regulation of translation in response to stress
set1∆	Sense	Downregulated	BP	GO:0010892	0.00422103	Inf	0.00422103	1	1	positive regulation of mitochondrial translation in response to stress
set1∆	Sense	Downregulated	BP	GO:0006830	0.00422103	Inf	0.00422103	1	1	high-affinity zinc ion transport
ash2∆	Sense	Upregulated	BP	GO:0006950	0.0042746	4.57029	2.27341	7	697	response to stress
set1∆	Antisense	Upregulated	BP	GO:0048523	0.00431205	2.06431	10.6262	20	322	negative regulation of cellular process
set1∆	Sense	Downregulated	BP	GO:0033554	0.00436323	3.9085	2.82809	8	670	cellular response to stress
set1∆	Antisense	Upregulated	BP	GO:0010468	0.00439854	1.95973	12.9033	23	391	regulation of gene expression
swd1∆	Sense	Upregulated	BP	GO:0006096	0.00440487	23.7517	0.101113	2	17	glycolysis
set1∆	Antisense	Upregulated	BP	GO:0007127	0.00443989	3.10708	3.20107	9	97	meiosis I
sdc1∆	Sense	Upregulated	MF	GO:0003824	0.00451309	2.1553	19.2897	29	1949	catalytic activity
shg1∆	Sense	Upregulated	CC	GO:0033620	0.00455623	350.067	0.00456274	1	4	Mei2 nuclear dot
shg1∆	Sense	Upregulated	CC	GO:0016604	0.00455623	350.067	0.00456274	1	4	nuclear body
shg1∆	Sense	Upregulated	MF	GO:0000150	0.00456143	349.667	0.00456795	1	4	recombinase activity
ash2∆	Sense	Downregulated	MF	GO:0016638	0.00456317	476.455	0.00456795	1	12	oxidoreductase activity, acting on the CH-NH2 group of donors
set1∆	Antisense	Upregulated	BP	GO:0051345	0.00459674	4.3012	1.58404	6	48	positive regulation of hydrolase activity
swd3∆	Sense	Upregulated	BP	GO:0006067	0.00459813	346.867	0.00460476	1	6	ethanol metabolic process
swd3∆	Sense	Upregulated	BP	GO:0006113	0.00459813	346.867	0.00460476	1	6	fermentation
swd3∆	Sense	Upregulated	BP	GO:0034308	0.00459813	346.867	0.00460476	1	6	primary alcohol metabolic process
sdc1∆	Antisense	Upregulated	BP	GO:0043620	0.00459857	371.571	0.00460476	1	3	regulation of DNA-dependent transcription in response to stress
sdc1∆	Antisense	Upregulated	BP	GO:0043618	0.00459857	371.571	0.00460476	1	3	regulation of transcription from RNA polymerase II promoter in response to stress
set1∆	Antisense	Downregulated	BP	GO:0070129	0.0045999	472.636	0.00460476	1	2	regulation of mitochondrial translation
set1∆	Antisense	Downregulated	BP	GO:0070131	0.0045999	472.636	0.00460476	1	2	positive regulation of mitochondrial translation
set1∆	Antisense	Downregulated	BP	GO:0010821	0.0045999	472.636	0.00460476	1	2	regulation of mitochondrion organization
set1∆	Antisense	Downregulated	BP	GO:0010822	0.0045999	472.636	0.00460476	1	2	positive regulation of mitochondrion organization
set1∆	Antisense	Downregulated	BP	GO:0006287	0.0045999	472.636	0.00460476	1	2	base-excision repair, gap-filling
swd2∆	Sense	Upregulated	BP	GO:0019318	0.00460125	24.9104	0.105334	2	61	hexose metabolic process
set1∆	Antisense	Upregulated	BP	GO:0080090	0.00461764	1.83454	16.8634	28	511	regulation of primary metabolic process
set1∆	Antisense	Upregulated	MF	GO:0043167	0.00469372	1.85008	16.0792	27	480	ion binding
set1∆	Antisense	Upregulated	MF	GO:0043169	0.00469372	1.85008	16.0792	27	480	cation binding
set1∆	Sense	Downregulated	MF	GO:0046915	0.00473723	22.6478	0.104682	2	25	transition metal ion transmembrane transporter activity
swd1∆	Sense	Downregulated	BP	GO:0033214	0.00478926	325.188	0.00479662	1	5	iron assimilation by chelation and transport
set1∆	Antisense	Upregulated	BP	GO:0032851	0.00479261	11.1657	0.363008	3	11	positive regulation of Rab GTPase activity
shg1∆	Antisense	Upregulated	BP	GO:0035023	0.00482097	22.5098	0.105718	2	19	regulation of Rho protein signal transduction
sdc1∆	Sense	Upregulated	BP	GO:0034605	0.00489555	9.81122	0.349194	3	35	cellular response to heat
sdc1∆	Sense	Upregulated	BP	GO:0009408	0.00489555	9.81122	0.349194	3	35	response to heat
set1∆	Antisense	Downregulated	MF	GO:0019992	0.00494296	436.667	0.00494861	1	2	diacylglycerol binding
set1∆	Antisense	Upregulated	BP	GO:0007049	0.004985	1.71936	22.6715	35	687	cell cycle
sdc1∆	Sense	Upregulated	MF	GO:0016620	0.00499135	23.08	0.108869	2	11	oxidoreductase activity, acting on the aldehyde or oxo group of donors, NAD or NADP as acceptor
set1∆	Antisense	Upregulated	MF	GO:0005097	0.00499935	10.9899	0.368481	3	11	Rab GTPase activator activity
sdc1∆	Sense	Downregulated	BP	GO:0000101	0.0051724	325.062	0.00518035	1	3	sulfur amino acid transport
sdc1∆	Sense	Downregulated	BP	GO:0006106	0.0051724	325.062	0.00518035	1	3	fumarate metabolic process
sdc1∆	Sense	Downregulated	BP	GO:0015718	0.0051724	325.062	0.00518035	1	3	monocarboxylic acid transport
swd2∆	Sense	Upregulated	BP	GO:0019660	0.0051724	325.062	0.00518035	1	3	glycolytic fermentation
swd2∆	Sense	Upregulated	BP	GO:0019655	0.0051724	325.062	0.00518035	1	3	glucose catabolic process to ethanol
swd2∆	Sense	Upregulated	BP	GO:0000955	0.0051724	325.062	0.00518035	1	3	amino acid catabolic process via Ehrlich pathway
swd2∆	Sense	Upregulated	BP	GO:0000947	0.0051724	325.062	0.00518035	1	3	amino acid catabolic process to alcohol via Ehrlich pathway
ash2∆	Sense	Upregulated	MF	GO:0003824	0.00519075	4.0888	6.30624	12	1949	catalytic activity
set1∆	Sense	Downregulated	MF	GO:0017076	0.00521868	3.78041	2.91016	8	695	purine nucleotide binding
swd2∆	Antisense	Upregulated	BP	GO:0044272	0.00523825	21.6891	0.110514	2	36	sulfur compound biosynthetic process
shg1∆	Antisense	Upregulated	CC	GO:0010339	0.0052442	21.4527	0.110266	2	20	external side of cell wall
ash2∆	Sense	Upregulated	BP	GO:0019320	0.00528381	21.5125	0.110898	2	34	hexose catabolic process
sdc1∆	Sense	Upregulated	BP	GO:0009266	0.00530333	9.51206	0.359171	3	36	response to temperature stimulus
ash2∆	Sense	Downregulated	CC	GO:0034708	0.00531661	403.462	0.00532319	1	14	methyltransferase complex
swd2∆	Sense	Downregulated	CC	GO:0034708	0.00531661	403.462	0.00532319	1	14	methyltransferase complex
swd3∆	Sense	Downregulated	CC	GO:0034708	0.00531661	403.462	0.00532319	1	14	methyltransferase complex
shg1∆	Antisense	Upregulated	MF	GO:0004715	0.00532927	Inf	0.00532927	1	1	non-membrane spanning protein tyrosine kinase activity
shg1∆	Antisense	Upregulated	MF	GO:0004635	0.00532927	Inf	0.00532927	1	1	phosphoribosyl-AMP cyclohydrolase activity
shg1∆	Antisense	Upregulated	MF	GO:0004636	0.00532927	Inf	0.00532927	1	1	phosphoribosyl-ATP diphosphatase activity
shg1∆	Antisense	Upregulated	MF	GO:0050839	0.00532927	Inf	0.00532927	1	1	cell adhesion molecule binding
set1∆	Sense	Downregulated	BP	GO:0051716	0.00533937	3.76441	2.92095	8	692	cellular response to stimulus
swd3∆	Sense	Upregulated	BP	GO:0006116	0.00536295	289	0.00537222	1	7	NADH oxidation
ash2∆	Sense	Downregulated	BP	GO:0051568	0.00536552	399.769	0.00537222	1	14	histone H3-K4 methylation
swd2∆	Sense	Downregulated	BP	GO:0051568	0.00536552	399.769	0.00537222	1	14	histone H3-K4 methylation
swd3∆	Sense	Downregulated	BP	GO:0051568	0.00536552	399.769	0.00537222	1	14	histone H3-K4 methylation
swd1∆	Sense	Upregulated	BP	GO:0019318	0.00543132	9.46367	0.362817	3	61	hexose metabolic process
set1∆	Antisense	Upregulated	BP	GO:0031323	0.00552137	1.7896	17.8864	29	542	regulation of cellular metabolic process
shg1∆	Antisense	Upregulated	BP	GO:0018108	0.00556408	Inf	0.00556408	1	1	peptidyl-tyrosine phosphorylation
shg1∆	Antisense	Upregulated	BP	GO:0035025	0.00556408	Inf	0.00556408	1	1	positive regulation of Rho protein signal transduction
set1∆	Sense	Downregulated	BP	GO:0006950	0.00558347	3.73295	2.94206	8	697	response to stress
set1∆	Antisense	Upregulated	MF	GO:0003677	0.00558822	1.97491	11.6239	21	347	DNA binding
set1∆	Antisense	Upregulated	MF	GO:0046872	0.00565965	1.84082	15.5097	26	463	metal ion binding
set1∆	Antisense	Upregulated	MF	GO:0008094	0.00567868	3.58498	2.17739	7	65	DNA-dependent ATPase activity
set1∆	Antisense	Upregulated	CC	GO:0000792	0.00569346	4.92593	1.1711	5	35	heterochromatin
sdc1∆	Sense	Downregulated	CC	GO:0034064	0.00569367	291.556	0.00570342	1	3	Tor2-Mei2-Ste11 complex
sdc1∆	Sense	Downregulated	CC	GO:0042597	0.00569367	291.556	0.00570342	1	3	periplasmic space
sdc1∆	Sense	Downregulated	CC	GO:0030287	0.00569367	291.556	0.00570342	1	3	cell wall-bounded periplasmic space
set1∆	Antisense	Upregulated	BP	GO:0043085	0.00569473	3.58161	2.17805	7	66	positive regulation of catalytic activity
set1∆	Antisense	Upregulated	BP	GO:0044093	0.00569473	3.58161	2.17805	7	66	positive regulation of molecular function
swd1∆	Antisense	Upregulated	CC	GO:0005796	0.00569583	374.571	0.00570342	1	2	Golgi lumen
swd1∆	Antisense	Upregulated	CC	GO:0005868	0.00569583	374.571	0.00570342	1	2	cytoplasmic dynein complex
sdc1∆	Sense	Downregulated	MF	GO:0000099	0.00570016	291.222	0.00570994	1	3	sulfur amino acid transmembrane transporter activity
sdc1∆	Sense	Downregulated	MF	GO:0016639	0.00570016	291.222	0.00570994	1	3	oxidoreductase activity, acting on the CH-NH2 group of donors, NAD or NADP as acceptor
swd1∆	Antisense	Upregulated	MF	GO:0004047	0.00570233	374.143	0.00570994	1	2	aminomethyltransferase activity
swd1∆	Antisense	Upregulated	MF	GO:0008569	0.00570233	374.143	0.00570994	1	2	minus-end-directed microtubule motor activity
swd1∆	Antisense	Upregulated	MF	GO:0009019	0.00570233	374.143	0.00570994	1	2	tRNA (guanine-N1-)-methyltransferase activity
shg1∆	Antisense	Upregulated	BP	GO:0051179	0.00570874	2.92007	5.68093	12	1021	localization
shg1∆	Sense	Upregulated	BP	GO:0000711	0.00574491	260.1	0.00575595	1	5	meiotic DNA repair synthesis
spp1∆	Sense	Upregulated	BP	GO:0000733	0.00574822	371.143	0.00575595	1	2	DNA strand renaturation
ash2∆	Sense	Downregulated	BP	GO:0009065	0.00574822	371.143	0.00575595	1	15	glutamine family amino acid catabolic process
ash2∆	Antisense	Upregulated	BP	GO:0032269	0.00575595	Inf	0.00575595	1	30	negative regulation of cellular protein metabolic process
sdc1∆	Sense	Upregulated	BP	GO:0016052	0.00577442	6.14855	0.728319	4	73	carbohydrate catabolic process
set1∆	Antisense	Upregulated	BP	GO:0045892	0.00588271	2.62189	4.58711	11	139	negative regulation of transcription, DNA-dependent
ash2∆	Sense	Upregulated	BP	GO:0009063	0.00591101	20.2392	0.117421	2	36	cellular amino acid catabolic process
set1∆	Antisense	Upregulated	BP	GO:0010605	0.00593856	2.24198	7.29317	15	221	negative regulation of macromolecule metabolic process
swd1∆	Sense	Upregulated	BP	GO:0005994	0.00594781	Inf	0.00594781	1	1	melibiose metabolic process
swd1∆	Sense	Upregulated	BP	GO:0005995	0.00594781	Inf	0.00594781	1	1	melibiose catabolic process
swd1∆	Sense	Upregulated	BP	GO:0001407	0.00594781	Inf	0.00594781	1	1	glycerophosphodiester transport
swd1∆	Sense	Upregulated	BP	GO:0043458	0.00594781	Inf	0.00594781	1	1	ethanol biosynthetic process involved in glucose fermentation to ethanol
swd1∆	Sense	Upregulated	BP	GO:0046477	0.00594781	Inf	0.00594781	1	1	glycosylceramide catabolic process
swd1∆	Sense	Upregulated	BP	GO:0051085	0.00594781	Inf	0.00594781	1	1	chaperone mediated protein folding requiring cofactor
swd1∆	Sense	Upregulated	BP	GO:0006115	0.00594781	Inf	0.00594781	1	1	ethanol biosynthetic process
swd1∆	Sense	Upregulated	BP	GO:0034309	0.00594781	Inf	0.00594781	1	1	primary alcohol biosynthetic process
swd1∆	Sense	Upregulated	BP	GO:0046521	0.00594781	Inf	0.00594781	1	1	sphingoid catabolic process
swd1∆	Sense	Upregulated	BP	GO:0046514	0.00594781	Inf	0.00594781	1	1	ceramide catabolic process
swd1∆	Sense	Upregulated	BP	GO:0015748	0.00594781	Inf	0.00594781	1	1	organophosphate ester transport
swd1∆	Sense	Upregulated	BP	GO:0019377	0.00594781	Inf	0.00594781	1	1	glycolipid catabolic process
swd1∆	Sense	Upregulated	BP	GO:0006677	0.00594781	Inf	0.00594781	1	1	glycosylceramide metabolic process
set1∆	Antisense	Upregulated	BP	GO:0048519	0.00606333	1.99393	10.9563	20	332	negative regulation of biological process
sdc1∆	Antisense	Upregulated	CC	GO:0016602	0.00607151	249.952	0.00608365	1	4	CCAAT-binding factor complex
swd2∆	Antisense	Upregulated	CC	GO:0017109	0.00607497	349.533	0.00608365	1	2	glutamate-cysteine ligase complex
sdc1∆	Antisense	Downregulated	MF	GO:0008422	0.00607843	249.667	0.0060906	1	8	beta-glucosidase activity
swd2∆	Antisense	Upregulated	MF	GO:0004047	0.0060819	349.133	0.0060906	1	2	aminomethyltransferase activity
swd2∆	Antisense	Upregulated	MF	GO:0030586	0.0060819	349.133	0.0060906	1	2	[methionine synthase] reductase activity
swd2∆	Antisense	Upregulated	MF	GO:0003978	0.0060819	349.133	0.0060906	1	2	UDP-glucose 4-epimerase activity
swd2∆	Antisense	Upregulated	MF	GO:0034649	0.0060819	349.133	0.0060906	1	2	histone demethylase activity (H3-monomethyl-K4 specific)
swd1∆	Sense	Upregulated	MF	GO:0015605	0.0060906	Inf	0.0060906	1	1	organophosphate ester transmembrane transporter activity
swd1∆	Sense	Upregulated	MF	GO:0004557	0.0060906	Inf	0.0060906	1	1	alpha-galactosidase activity
swd1∆	Sense	Upregulated	MF	GO:0015925	0.0060906	Inf	0.0060906	1	1	galactosidase activity
swd1∆	Sense	Upregulated	MF	GO:0008514	0.0060906	Inf	0.0060906	1	1	organic anion transmembrane transporter activity
swd1∆	Sense	Upregulated	MF	GO:0004332	0.0060906	Inf	0.0060906	1	1	fructose-bisphosphate aldolase activity
swd1∆	Sense	Upregulated	MF	GO:0001406	0.0060906	Inf	0.0060906	1	1	glycerophosphodiester transmembrane transporter activity
sdc1∆	Antisense	Upregulated	BP	GO:0001676	0.00612732	247.667	0.00613968	1	4	long-chain fatty acid metabolic process
ash2∆	Antisense	Downregulated	BP	GO:0034067	0.00612732	247.667	0.00613968	1	8	protein localization to Golgi apparatus
ash2∆	Antisense	Downregulated	BP	GO:0045053	0.00612732	247.667	0.00613968	1	8	protein retention in Golgi apparatus
sdc1∆	Antisense	Downregulated	BP	GO:0034067	0.00612732	247.667	0.00613968	1	8	protein localization to Golgi apparatus
sdc1∆	Antisense	Downregulated	BP	GO:0070879	0.00612732	247.667	0.00613968	1	8	fungal-type cell wall beta-glucan metabolic process
sdc1∆	Antisense	Downregulated	BP	GO:0045053	0.00612732	247.667	0.00613968	1	8	protein retention in Golgi apparatus
swd3∆	Sense	Upregulated	BP	GO:0006734	0.00612732	247.667	0.00613968	1	8	NADH metabolic process
swd2∆	Antisense	Upregulated	BP	GO:0034720	0.00613084	346.333	0.00613968	1	2	histone H3-K4 demethylation
set1∆	Antisense	Upregulated	BP	GO:0006298	0.00623658	9.92308	0.396009	3	12	mismatch repair
swd2∆	Sense	Upregulated	MF	GO:0015204	0.00626898	262.05	0.00628093	1	3	urea transmembrane transporter activity
swd2∆	Sense	Upregulated	MF	GO:0042887	0.00626898	262.05	0.00628093	1	3	amide transmembrane transporter activity
ash2∆	Antisense	Upregulated	BP	GO:0051248	0.00633154	Inf	0.00633154	1	33	negative regulation of protein metabolic process
set1∆	Antisense	Upregulated	BP	GO:0007165	0.00635411	1.89297	13.2993	23	403	signal transduction
set1∆	Antisense	Upregulated	CC	GO:0070187	0.00638943	29.2069	0.13384	2	4	telosome
ash2∆	Sense	Upregulated	CC	GO:0000015	0.00645405	327.625	0.00646388	1	2	phosphopyruvate hydratase complex
ash2∆	Sense	Upregulated	MF	GO:0004634	0.0064614	327.25	0.00647126	1	2	phosphopyruvate hydratase activity
ash2∆	Sense	Upregulated	MF	GO:0016206	0.0064614	327.25	0.00647126	1	2	catechol O-methyltransferase activity
ash2∆	Sense	Upregulated	MF	GO:0004371	0.0064614	327.25	0.00647126	1	2	glycerone kinase activity
ash2∆	Sense	Upregulated	MF	GO:0009013	0.0064614	327.25	0.00647126	1	2	succinate-semialdehyde dehydrogenase [NAD(P)+] activity
ash2∆	Sense	Upregulated	MF	GO:0003935	0.0064614	327.25	0.00647126	1	2	GTP cyclohydrolase II activity
set1∆	Antisense	Upregulated	BP	GO:0009890	0.00650319	2.28683	6.66616	14	202	negative regulation of biosynthetic process
set1∆	Antisense	Upregulated	BP	GO:0031327	0.00650319	2.28683	6.66616	14	202	negative regulation of cellular biosynthetic process
swd2∆	Sense	Upregulated	BP	GO:0016052	0.00653689	20.6519	0.126055	2	73	carbohydrate catabolic process
set1∆	Antisense	Upregulated	BP	GO:0051253	0.00654216	2.58051	4.65311	11	141	negative regulation of RNA metabolic process
set1∆	Antisense	Upregulated	MF	GO:0005099	0.00654222	6.19217	0.770461	4	23	Ras GTPase activator activity
set1∆	Antisense	Upregulated	BP	GO:0009154	0.00655641	2.15474	8.08519	16	245	purine ribonucleotide catabolic process
set1∆	Antisense	Upregulated	BP	GO:0009146	0.00655641	2.15474	8.08519	16	245	purine nucleoside triphosphate catabolic process
set1∆	Antisense	Upregulated	BP	GO:0009261	0.00655641	2.15474	8.08519	16	245	ribonucleotide catabolic process
set1∆	Antisense	Upregulated	BP	GO:0009203	0.00655641	2.15474	8.08519	16	245	ribonucleoside triphosphate catabolic process
set1∆	Antisense	Upregulated	BP	GO:0009207	0.00655641	2.15474	8.08519	16	245	purine ribonucleoside triphosphate catabolic process
set1∆	Antisense	Upregulated	BP	GO:0046034	0.00678733	2.27426	6.69916	14	203	ATP metabolic process
set1∆	Antisense	Upregulated	BP	GO:0006195	0.00681334	2.14493	8.11819	16	246	purine nucleotide catabolic process
set1∆	Antisense	Upregulated	BP	GO:0010033	0.00684254	3.92404	1.71604	6	52	response to organic substance
shg1∆	Antisense	Upregulated	CC	GO:0016021	0.00684789	2.92509	5.04468	11	915	integral to membrane
shg1∆	Sense	Upregulated	BP	GO:0000730	0.00689059	208.04	0.00690714	1	6	DNA recombinase assembly
shg1∆	Sense	Upregulated	BP	GO:0045003	0.00689059	208.04	0.00690714	1	6	double-strand break repair via synthesis-dependent strand annealing
shg1∆	Sense	Upregulated	BP	GO:0051260	0.00689059	208.04	0.00690714	1	6	protein homooligomerization
sdc1∆	Sense	Downregulated	BP	GO:0000722	0.00689125	216.667	0.00690714	1	4	telomere maintenance via recombination
sdc1∆	Sense	Downregulated	BP	GO:0045836	0.00689125	216.667	0.00690714	1	4	positive regulation of meiosis
set1∆	Antisense	Upregulated	BP	GO:0006281	0.00689636	2.445	5.34612	12	162	DNA repair
ash2∆	Sense	Upregulated	BP	GO:0050896	0.00698157	4.12935	2.47889	7	760	response to stimulus
shg1∆	Antisense	Upregulated	BP	GO:0022610	0.00703526	18.2081	0.127974	2	23	biological adhesion
shg1∆	Antisense	Upregulated	BP	GO:0007155	0.00703526	18.2081	0.127974	2	23	cell adhesion
set1∆	Antisense	Upregulated	BP	GO:0009141	0.0070766	2.08387	8.87721	17	269	nucleoside triphosphate metabolic process
set1∆	Antisense	Upregulated	BP	GO:0009143	0.00707837	2.1352	8.15119	16	247	nucleoside triphosphate catabolic process
sdc1∆	Sense	Upregulated	BP	GO:0070301	0.00709876	18.7236	0.129701	2	13	cellular response to hydrogen peroxide
sdc1∆	Sense	Upregulated	BP	GO:0042542	0.00709876	18.7236	0.129701	2	13	response to hydrogen peroxide
sdc1∆	Sense	Upregulated	BP	GO:0019430	0.00709876	18.7236	0.129701	2	13	removal of superoxide radicals
shg1∆	Sense	Upregulated	BP	GO:0000279	0.00711203	12.383	0.451266	3	392	M phase
set1∆	Antisense	Upregulated	BP	GO:0032320	0.00725732	5.97619	0.792018	4	24	positive regulation of Ras GTPase activity
ash2∆	Sense	Upregulated	BP	GO:0046395	0.00726256	18.0947	0.130468	2	40	carboxylic acid catabolic process
ash2∆	Sense	Upregulated	BP	GO:0016054	0.00726256	18.0947	0.130468	2	40	organic acid catabolic process
ash2∆	Sense	Upregulated	BP	GO:0009310	0.00726256	18.0947	0.130468	2	40	amine catabolic process
swd3∆	Antisense	Upregulated	BP	GO:0006518	0.00727828	288.444	0.00729087	1	19	peptide metabolic process
set1∆	Sense	Downregulated	BP	GO:0065008	0.00735052	4.84551	1.27475	5	302	regulation of biological quality
set1∆	Antisense	Downregulated	MF	GO:0015204	0.00740597	218.292	0.00742292	1	3	urea transmembrane transporter activity
set1∆	Antisense	Downregulated	MF	GO:0042887	0.00740597	218.292	0.00742292	1	3	amide transmembrane transporter activity
shg1∆	Sense	Downregulated	CC	GO:0000781	0.00741445	Inf	0.00741445	1	39	chromosome, telomeric region
set1∆	Sense	Downregulated	BP	GO:0042592	0.00747279	5.97849	0.801995	4	190	homeostatic process
shg1∆	Antisense	Upregulated	CC	GO:0044462	0.0075147	17.5387	0.132319	2	24	external encapsulating structure part
shg1∆	Antisense	Upregulated	CC	GO:0044426	0.0075147	17.5387	0.132319	2	24	cell wall part
swd1∆	Sense	Downregulated	CC	GO:0048188	0.00758434	187.429	0.00760456	1	8	Set1C/COMPASS complex
swd1∆	Sense	Downregulated	CC	GO:0035097	0.00758434	187.429	0.00760456	1	8	histone methyltransferase complex
sdc1∆	Sense	Downregulated	CC	GO:0033620	0.00758506	194.333	0.00760456	1	4	Mei2 nuclear dot
sdc1∆	Sense	Downregulated	CC	GO:0016604	0.00758506	194.333	0.00760456	1	4	nuclear body
shg1∆	Sense	Downregulated	MF	GO:0004003	0.00761325	Inf	0.00761325	1	40	ATP-dependent DNA helicase activity
sdc1∆	Sense	Upregulated	BP	GO:0046165	0.00764568	8.25242	0.409056	3	41	alcohol biosynthetic process
swd1∆	Sense	Downregulated	BP	GO:0033212	0.007654	185.714	0.0076746	1	8	iron assimilation
set1∆	Sense	Downregulated	MF	GO:0031072	0.00769473	17.34	0.133993	2	32	heat shock protein binding
set1∆	Sense	Upregulated	BP	GO:0042125	0.00773069	18.0456	0.13584	2	12	protein galactosylation
set1∆	Sense	Downregulated	MF	GO:0000166	0.00774348	3.50731	3.10278	8	741	nucleotide binding
swd2∆	Sense	Upregulated	BP	GO:0005996	0.00781093	18.7729	0.138143	2	80	monosaccharide metabolic process
set1∆	Antisense	Upregulated	BP	GO:0009166	0.00792379	2.10651	8.25019	16	250	nucleotide catabolic process
shg1∆	Sense	Upregulated	CC	GO:0031105	0.00796205	174.933	0.00798479	1	7	septin complex
shg1∆	Sense	Upregulated	MF	GO:0008143	0.00797111	174.733	0.00799391	1	7	poly(A) RNA binding
shg1∆	Sense	Upregulated	MF	GO:0070717	0.00797111	174.733	0.00799391	1	7	poly-purine tract binding
swd3∆	Sense	Upregulated	MF	GO:0004022	0.00797111	174.733	0.00799391	1	7	alcohol dehydrogenase (NAD) activity
sdc1∆	Sense	Upregulated	BP	GO:0005996	0.00797235	5.57456	0.798158	4	80	monosaccharide metabolic process
ash2∆	Sense	Upregulated	BP	GO:0046365	0.00798612	17.1833	0.136992	2	42	monosaccharide catabolic process
shg1∆	Sense	Downregulated	MF	GO:0003678	0.00799391	Inf	0.00799391	1	42	DNA helicase activity
set1∆	Antisense	Upregulated	BP	GO:0010629	0.00803459	2.50144	4.78511	11	145	negative regulation of gene expression
shg1∆	Sense	Upregulated	BP	GO:0043487	0.00803516	173.333	0.00805833	1	7	regulation of RNA stability
shg1∆	Sense	Upregulated	BP	GO:0043488	0.00803516	173.333	0.00805833	1	7	regulation of mRNA stability
shg1∆	Sense	Upregulated	BP	GO:0045835	0.00803516	173.333	0.00805833	1	7	negative regulation of meiosis
set1∆	Antisense	Upregulated	BP	GO:0019222	0.00806294	1.73299	18.3814	29	557	regulation of metabolic process
set1∆	Sense	Upregulated	MF	GO:0019239	0.0081208	17.5695	0.139322	2	12	deaminase activity
set1∆	Sense	Upregulated	BP	GO:0009112	0.00814837	8.06565	0.418841	3	37	nucleobase metabolic process
swd3∆	Sense	Upregulated	MF	GO:0022804	0.00815947	20.492	0.145032	2	127	active transmembrane transporter activity
set1∆	Antisense	Upregulated	BP	GO:0031324	0.00818374	2.15459	7.55718	15	229	negative regulation of cellular metabolic process
swd2∆	Sense	Upregulated	MF	GO:0022891	0.00818704	9.12319	0.439665	3	210	substrate-specific transmembrane transporter activity
set1∆	Antisense	Upregulated	MF	GO:0046527	0.00824819	8.78844	0.435478	3	13	glucosyltransferase activity
swd2∆	Sense	Upregulated	MF	GO:0016832	0.00835069	174.667	0.00837457	1	4	aldehyde-lyase activity
set1∆	Sense	Downregulated	MF	GO:0004371	0.00835783	249.095	0.00837457	1	2	glycerone kinase activity
set1∆	Sense	Downregulated	MF	GO:0003935	0.00835783	249.095	0.00837457	1	2	GTP cyclohydrolase II activity
set1∆	Sense	Downregulated	BP	GO:0070129	0.00842505	247.095	0.00844206	1	2	regulation of mitochondrial translation
set1∆	Sense	Downregulated	BP	GO:0070131	0.00842505	247.095	0.00844206	1	2	positive regulation of mitochondrial translation
set1∆	Sense	Downregulated	BP	GO:0050821	0.00842505	247.095	0.00844206	1	2	protein stabilization
set1∆	Sense	Downregulated	BP	GO:0010106	0.00842505	247.095	0.00844206	1	2	cellular response to iron ion starvation
set1∆	Sense	Downregulated	BP	GO:0010821	0.00842505	247.095	0.00844206	1	2	regulation of mitochondrion organization
set1∆	Sense	Downregulated	BP	GO:0010822	0.00842505	247.095	0.00844206	1	2	positive regulation of mitochondrion organization
set1∆	Sense	Downregulated	BP	GO:0033217	0.00842505	247.095	0.00844206	1	2	regulation of transcription from RNA polymerase II promoter in response to iron ion starvation
swd1∆	Antisense	Upregulated	CC	GO:0055087	0.00853238	187.25	0.00855513	1	3	Ski complex
swd1∆	Antisense	Upregulated	MF	GO:0019904	0.0085421	187.036	0.0085649	1	3	protein domain specific binding
set1∆	Sense	Upregulated	BP	GO:0006725	0.00859817	5.4385	0.815042	4	72	cellular aromatic compound metabolic process
sdc1∆	Sense	Downregulated	BP	GO:0010563	0.00860745	162.469	0.00863392	1	5	negative regulation of phosphorus metabolic process
sdc1∆	Sense	Downregulated	BP	GO:0045936	0.00860745	162.469	0.00863392	1	5	negative regulation of phosphate metabolic process
sdc1∆	Sense	Downregulated	BP	GO:0042326	0.00860745	162.469	0.00863392	1	5	negative regulation of phosphorylation
sdc1∆	Sense	Downregulated	BP	GO:0006538	0.00860745	162.469	0.00863392	1	5	glutamate catabolic process
spp1∆	Sense	Upregulated	BP	GO:0043489	0.00861074	185.536	0.00863392	1	3	RNA stabilization
spp1∆	Sense	Upregulated	BP	GO:0032889	0.00861074	185.536	0.00863392	1	3	regulation of vacuole fusion, non-autophagic
spp1∆	Sense	Upregulated	BP	GO:0048255	0.00861074	185.536	0.00863392	1	3	mRNA stabilization
spp1∆	Sense	Upregulated	BP	GO:0031990	0.00861074	185.536	0.00863392	1	3	mRNA export from nucleus in response to heat stress
spp1∆	Sense	Upregulated	BP	GO:0045002	0.00861074	185.536	0.00863392	1	3	double-strand break repair via single-strand annealing
swd1∆	Antisense	Upregulated	BP	GO:0000743	0.00861074	185.536	0.00863392	1	3	nuclear migration involved in conjugation with cellular fusion
set1∆	Antisense	Upregulated	MF	GO:0019787	0.0087148	2.76739	3.55082	9	106	small conjugating protein ligase activity
spp1∆	Sense	Upregulated	BP	GO:0051028	0.00874538	16.5032	0.143899	2	50	mRNA transport
spp1∆	Sense	Upregulated	BP	GO:0006406	0.00874538	16.5032	0.143899	2	50	mRNA export from nucleus
shg1∆	Sense	Upregulated	CC	GO:0032156	0.00909516	149.914	0.00912548	1	8	septin cytoskeleton
swd2∆	Antisense	Upregulated	CC	GO:0055087	0.00909947	174.733	0.00912548	1	3	Ski complex
swd2∆	Antisense	Upregulated	MF	GO:0016857	0.00910983	174.533	0.0091359	1	3	racemase and epimerase activity, acting on carbohydrates and derivatives
shg1∆	Sense	Upregulated	BP	GO:0051259	0.00917864	148.543	0.00920952	1	8	protein oligomerization
swd2∆	Antisense	Upregulated	BP	GO:0006750	0.00918303	173.133	0.00920952	1	3	glutathione biosynthetic process
swd2∆	Sense	Downregulated	BP	GO:0006879	0.00918919	225.522	0.00920952	1	24	cellular iron ion homeostasis
swd2∆	Sense	Downregulated	BP	GO:0055072	0.00918919	225.522	0.00920952	1	24	iron ion homeostasis
swd3∆	Sense	Downregulated	BP	GO:0006879	0.00918919	225.522	0.00920952	1	24	cellular iron ion homeostasis
swd3∆	Sense	Downregulated	BP	GO:0055072	0.00918919	225.522	0.00920952	1	24	iron ion homeostasis
set1∆	Sense	Downregulated	BP	GO:0034605	0.00930283	15.6273	0.147736	2	35	cellular response to heat
set1∆	Sense	Downregulated	BP	GO:0009408	0.00930283	15.6273	0.147736	2	35	response to heat
sdc1∆	Sense	Downregulated	CC	GO:0048189	0.00947322	145.722	0.0095057	1	5	Lid2 complex
set1∆	Sense	Downregulated	BP	GO:0050896	0.00947379	3.37234	3.20798	8	760	response to stimulus
sdc1∆	Sense	Downregulated	MF	GO:0005315	0.009484	145.556	0.00951656	1	5	inorganic phosphate transmembrane transporter activity
sdc1∆	Sense	Downregulated	MF	GO:0004860	0.009484	145.556	0.00951656	1	5	protein kinase inhibitor activity
sdc1∆	Sense	Downregulated	MF	GO:0015114	0.009484	145.556	0.00951656	1	5	phosphate ion transmembrane transporter activity
sdc1∆	Sense	Downregulated	MF	GO:0019210	0.009484	145.556	0.00951656	1	5	kinase inhibitor activity
swd1∆	Sense	Downregulated	MF	GO:0005381	0.009484	145.556	0.00951656	1	10	iron ion transmembrane transporter activity
swd2∆	Sense	Downregulated	MF	GO:0046915	0.00949482	217.833	0.00951656	1	25	transition metal ion transmembrane transporter activity
swd3∆	Sense	Downregulated	MF	GO:0046915	0.00949482	217.833	0.00951656	1	25	transition metal ion transmembrane transporter activity
swd1∆	Sense	Downregulated	BP	GO:0019856	0.00956016	144.389	0.00959325	1	10	pyrimidine nucleobase biosynthetic process
ash2∆	Sense	Downregulated	BP	GO:0006536	0.00957115	216.083	0.00959325	1	25	glutamate metabolic process
ash2∆	Antisense	Upregulated	BP	GO:0006402	0.00959325	Inf	0.00959325	1	50	mRNA catabolic process
ash2∆	Sense	Upregulated	MF	GO:0003959	0.00967735	163.594	0.00970689	1	3	NADPH dehydrogenase activity
ash2∆	Sense	Upregulated	MF	GO:0003933	0.00967735	163.594	0.00970689	1	3	GTP cyclohydrolase activity
ash2∆	Sense	Upregulated	BP	GO:0019660	0.0097551	162.281	0.00978511	1	3	glycolytic fermentation
ash2∆	Sense	Upregulated	BP	GO:0019655	0.0097551	162.281	0.00978511	1	3	glucose catabolic process to ethanol
ash2∆	Sense	Upregulated	BP	GO:0000955	0.0097551	162.281	0.00978511	1	3	amino acid catabolic process via Ehrlich pathway
ash2∆	Sense	Upregulated	BP	GO:0000947	0.0097551	162.281	0.00978511	1	3	amino acid catabolic process to alcohol via Ehrlich pathway
set1∆	Antisense	Upregulated	BP	GO:0006259	0.00982095	1.92789	10.6922	19	324	DNA metabolic process
set1∆	Sense	Downregulated	BP	GO:0009266	0.009825	15.1647	0.151957	2	36	response to temperature stimulus
set1∆	Antisense	Downregulated	CC	GO:0045334	0.00985214	145.667	0.00988593	1	4	clathrin-coated endocytic vesicle
set1∆	Antisense	Downregulated	CC	GO:0030122	0.00985214	145.667	0.00988593	1	4	AP-2 adaptor complex
set1∆	Antisense	Downregulated	CC	GO:0030128	0.00985214	145.667	0.00988593	1	4	clathrin coat of endocytic vesicle
set1∆	Antisense	Downregulated	CC	GO:0031415	0.00985214	145.667	0.00988593	1	4	NatA complex
set1∆	Antisense	Downregulated	CC	GO:0030666	0.00985214	145.667	0.00988593	1	4	endocytic vesicle membrane
set1∆	Antisense	Downregulated	CC	GO:0030669	0.00985214	145.667	0.00988593	1	4	clathrin-coated endocytic vesicle membrane
set1∆	Antisense	Downregulated	MF	GO:0043035	0.00986335	145.5	0.00989722	1	4	chromatin insulator sequence binding
sdc1∆	Sense	Upregulated	MF	GO:0047018	0.00989722	Inf	0.00989722	1	1	indole-3-acetaldehyde reductase (NADH) activity
sdc1∆	Sense	Upregulated	MF	GO:0047019	0.00989722	Inf	0.00989722	1	1	indole-3-acetaldehyde reductase (NADPH) activity
sdc1∆	Sense	Upregulated	MF	GO:0008941	0.00989722	Inf	0.00989722	1	1	nitric oxide dioxygenase activity
sdc1∆	Sense	Upregulated	MF	GO:0004618	0.00989722	Inf	0.00989722	1	1	phosphoglycerate kinase activity
sdc1∆	Sense	Upregulated	MF	GO:0004365	0.00989722	Inf	0.00989722	1	1	glyceraldehyde-3-phosphate dehydrogenase (NAD+) (phosphorylating) activity
sdc1∆	Sense	Upregulated	MF	GO:0016708	0.00989722	Inf	0.00989722	1	1	oxidoreductase activity, acting on paired donors, with incorporation or reduction of molecular oxygen, NAD(P)H as one donor, and incorporation of two atoms of oxygen into one donor
sdc1∆	Sense	Upregulated	MF	GO:0051268	0.00989722	Inf	0.00989722	1	1	alpha-keto amide reductase activity
sdc1∆	Sense	Upregulated	MF	GO:0051269	0.00989722	Inf	0.00989722	1	1	alpha-keto ester reductase activity
sdc1∆	Sense	Upregulated	MF	GO:0016652	0.00989722	Inf	0.00989722	1	1	oxidoreductase activity, acting on NAD(P)H, NAD(P) as acceptor
sdc1∆	Sense	Upregulated	BP	GO:0043458	0.00997698	Inf	0.00997698	1	1	ethanol biosynthetic process involved in glucose fermentation to ethanol
sdc1∆	Sense	Upregulated	BP	GO:0070458	0.00997698	Inf	0.00997698	1	1	cellular detoxification of nitrogen compound
sdc1∆	Sense	Upregulated	BP	GO:0070297	0.00997698	Inf	0.00997698	1	1	regulation of phosphorelay signal transduction system
sdc1∆	Sense	Upregulated	BP	GO:0051085	0.00997698	Inf	0.00997698	1	1	chaperone mediated protein folding requiring cofactor
sdc1∆	Sense	Upregulated	BP	GO:0006115	0.00997698	Inf	0.00997698	1	1	ethanol biosynthetic process
sdc1∆	Sense	Upregulated	BP	GO:0034309	0.00997698	Inf	0.00997698	1	1	primary alcohol biosynthetic process
sdc1∆	Sense	Upregulated	BP	GO:0051410	0.00997698	Inf	0.00997698	1	1	detoxification of nitrogen compound
shg1∆	Antisense	Upregulated	BP	GO:0006810	0.0100835	2.84562	4.55698	10	819	transport
set1∆	Antisense	Upregulated	BP	GO:0000710	0.0101396	19.7529	0.165004	2	5	meiotic mismatch repair
set1∆	Antisense	Upregulated	BP	GO:0000712	0.0101396	19.7529	0.165004	2	5	resolution of meiotic recombination intermediates
set1∆	Antisense	Upregulated	BP	GO:0051307	0.0101396	19.7529	0.165004	2	5	meiotic chromosome separation
shg1∆	Sense	Upregulated	MF	GO:0003727	0.0102388	131	0.0102779	1	9	single-stranded RNA binding
shg1∆	Sense	Upregulated	BP	GO:0022403	0.0102942	10.7252	0.514582	3	447	cell cycle phase
sdc1∆	Sense	Downregulated	BP	GO:0006103	0.010321	129.95	0.0103607	1	6	2-oxoglutarate metabolic process
sdc1∆	Sense	Downregulated	BP	GO:0051180	0.010321	129.95	0.0103607	1	6	vitamin transport
swd2∆	Sense	Upregulated	BP	GO:0006067	0.010321	129.95	0.0103607	1	6	ethanol metabolic process
swd2∆	Sense	Upregulated	BP	GO:0006113	0.010321	129.95	0.0103607	1	6	fermentation
swd2∆	Sense	Upregulated	BP	GO:0034308	0.010321	129.95	0.0103607	1	6	primary alcohol metabolic process
shg1∆	Antisense	Upregulated	BP	GO:0007266	0.0103321	14.6923	0.155794	2	28	Rho protein signal transduction
swd1∆	Antisense	Downregulated	BP	GO:0042398	0.0103349	199.385	0.0103607	1	27	cellular modified amino acid biosynthetic process
swd3∆	Antisense	Upregulated	BP	GO:0042398	0.0103349	199.385	0.0103607	1	27	cellular modified amino acid biosynthetic process
ash2∆	Sense	Upregulated	BP	GO:0006006	0.0103433	14.9246	0.156562	2	48	glucose metabolic process
ash2∆	Antisense	Upregulated	BP	GO:0006417	0.0103607	Inf	0.0103607	1	54	regulation of translation
set1∆	Antisense	Upregulated	CC	GO:0005694	0.0103656	1.78108	14.6555	24	438	chromosome
swd1∆	Sense	Upregulated	MF	GO:0048037	0.0104662	5.22405	0.870955	4	143	cofactor binding
shg1∆	Antisense	Upregulated	CC	GO:0016020	0.0104994	2.6068	6.92471	13	1256	membrane
spp1∆	Antisense	Upregulated	CC	GO:0016020	0.0105118	1.85969	16.9536	26	1256	membrane
sdc1∆	Sense	Upregulated	MF	GO:0016209	0.0105515	14.8229	0.158356	2	16	antioxidant activity
set1∆	Antisense	Upregulated	BP	GO:0006323	0.0105632	3.14889	2.44206	7	74	DNA packaging
shg1∆	Antisense	Upregulated	MF	GO:0004831	0.0106312	193.519	0.0106585	1	2	tyrosine-tRNA ligase activity
sdc1∆	Sense	Upregulated	BP	GO:0006801	0.0107145	14.7029	0.159632	2	16	superoxide metabolic process
ash2∆	Sense	Downregulated	BP	GO:0043648	0.0107166	191.963	0.0107444	1	28	dicarboxylic acid metabolic process
set1∆	Antisense	Upregulated	BP	GO:0046700	0.0109571	2.02469	8.5472	16	259	heterocycle catabolic process
shg1∆	Antisense	Upregulated	CC	GO:0032541	0.0109973	186.786	0.0110266	1	2	cortical endoplasmic reticulum
swd3∆	Antisense	Upregulated	MF	GO:0003779	0.0110098	186.571	0.0110392	1	29	actin binding
swd1∆	Antisense	Upregulated	MF	GO:0043565	0.0110912	14.5007	0.162733	2	57	sequence-specific DNA binding
shg1∆	Antisense	Upregulated	BP	GO:0051238	0.0110983	185.071	0.0111282	1	2	sequestering of metal ion
shg1∆	Antisense	Upregulated	BP	GO:0018212	0.0110983	185.071	0.0111282	1	2	peptidyl-tyrosine modification
shg1∆	Antisense	Upregulated	BP	GO:0019539	0.0110983	185.071	0.0111282	1	2	siderophore biosynthetic process from hydroxamic acid
shg1∆	Antisense	Upregulated	BP	GO:0031168	0.0110983	185.071	0.0111282	1	2	ferrichrome metabolic process
shg1∆	Antisense	Upregulated	BP	GO:0031169	0.0110983	185.071	0.0111282	1	2	ferrichrome biosynthetic process
shg1∆	Antisense	Upregulated	BP	GO:0051664	0.0110983	185.071	0.0111282	1	2	nuclear pore localization
shg1∆	Antisense	Upregulated	BP	GO:0006437	0.0110983	185.071	0.0111282	1	2	tyrosyl-tRNA aminoacylation
shg1∆	Antisense	Upregulated	BP	GO:0031660	0.0110983	185.071	0.0111282	1	2	regulation of cyclin-dependent protein serine/threonine kinase activity involved in G2/M transition of mitotic cell cycle
shg1∆	Antisense	Upregulated	BP	GO:0006880	0.0110983	185.071	0.0111282	1	2	intracellular sequestering of iron ion
shg1∆	Antisense	Upregulated	BP	GO:0009268	0.0110983	185.071	0.0111282	1	2	response to pH
shg1∆	Antisense	Upregulated	BP	GO:0031081	0.0110983	185.071	0.0111282	1	2	nuclear pore distribution
set1∆	Antisense	Upregulated	BP	GO:0022403	0.0111253	1.76998	14.7513	24	447	cell cycle phase
shg1∆	Sense	Downregulated	BP	GO:0000723	0.0111282	Inf	0.0111282	1	58	telomere maintenance
shg1∆	Sense	Downregulated	BP	GO:0032200	0.0111282	Inf	0.0111282	1	58	telomere organization
set1∆	Antisense	Upregulated	MF	GO:0016787	0.011133	1.58654	26.4301	38	789	hydrolase activity
set1∆	Sense	Upregulated	BP	GO:0019858	0.01132	Inf	0.01132	1	1	cytosine metabolic process
set1∆	Sense	Upregulated	BP	GO:0043433	0.01132	Inf	0.01132	1	1	negative regulation of sequence-specific DNA binding transcription factor activity
set1∆	Sense	Upregulated	BP	GO:0015887	0.01132	Inf	0.01132	1	1	pantothenate transmembrane transport
set1∆	Sense	Upregulated	BP	GO:0000091	0.01132	Inf	0.01132	1	1	mitotic anaphase A
set1∆	Sense	Upregulated	BP	GO:0015695	0.01132	Inf	0.01132	1	1	organic cation transport
set1∆	Sense	Upregulated	BP	GO:0015696	0.01132	Inf	0.01132	1	1	ammonium transport
set1∆	Sense	Upregulated	BP	GO:0051100	0.01132	Inf	0.01132	1	1	negative regulation of binding
set1∆	Sense	Upregulated	BP	GO:0046098	0.01132	Inf	0.01132	1	1	guanine metabolic process
set1∆	Sense	Upregulated	BP	GO:0043392	0.01132	Inf	0.01132	1	1	negative regulation of DNA binding
swd1∆	Antisense	Upregulated	CC	GO:0005960	0.0113614	124.81	0.0114068	1	4	glycine cleavage complex
swd1∆	Antisense	Upregulated	CC	GO:0030286	0.0113614	124.81	0.0114068	1	4	dynein complex
swd1∆	Antisense	Upregulated	CC	GO:0030981	0.0113614	124.81	0.0114068	1	4	cortical microtubule cytoskeleton
sdc1∆	Sense	Downregulated	MF	GO:0015175	0.0113711	116.422	0.0114199	1	6	neutral amino acid transmembrane transporter activity
sdc1∆	Sense	Downregulated	MF	GO:0003993	0.0113711	116.422	0.0114199	1	6	acid phosphatase activity
spp1∆	Sense	Upregulated	MF	GO:0000150	0.0113743	124.667	0.0114199	1	4	recombinase activity
swd1∆	Antisense	Upregulated	MF	GO:0004525	0.0113743	124.667	0.0114199	1	4	ribonuclease III activity
swd1∆	Antisense	Upregulated	MF	GO:0017048	0.0113743	124.667	0.0114199	1	4	Rho GTPase binding
swd1∆	Sense	Downregulated	BP	GO:0006221	0.0114634	118.091	0.0115119	1	12	pyrimidine nucleotide biosynthetic process
swd1∆	Antisense	Upregulated	BP	GO:0009071	0.0114656	123.667	0.0115119	1	4	serine family amino acid catabolic process
swd1∆	Antisense	Upregulated	BP	GO:0019464	0.0114656	123.667	0.0115119	1	4	glycine decarboxylation via glycine cleavage system
swd1∆	Antisense	Upregulated	BP	GO:0006546	0.0114656	123.667	0.0115119	1	4	glycine catabolic process
set1∆	Antisense	Upregulated	BP	GO:0009892	0.0114715	2.06378	7.85418	15	238	negative regulation of metabolic process
swd1∆	Sense	Upregulated	BP	GO:0005996	0.0114906	7.10204	0.475825	3	80	monosaccharide metabolic process
set1∆	Sense	Upregulated	MF	GO:0008108	0.0116102	Inf	0.0116102	1	1	UDP-glucose:hexose-1-phosphate uridylyltransferase activity
set1∆	Sense	Upregulated	MF	GO:0030248	0.0116102	Inf	0.0116102	1	1	cellulose binding
set1∆	Sense	Upregulated	MF	GO:0004065	0.0116102	Inf	0.0116102	1	1	arylsulfatase activity
set1∆	Sense	Upregulated	MF	GO:0008892	0.0116102	Inf	0.0116102	1	1	guanine deaminase activity
set1∆	Sense	Upregulated	MF	GO:0004617	0.0116102	Inf	0.0116102	1	1	phosphoglycerate dehydrogenase activity
set1∆	Sense	Upregulated	MF	GO:0015233	0.0116102	Inf	0.0116102	1	1	pantothenate transmembrane transporter activity
set1∆	Sense	Upregulated	MF	GO:0046941	0.0116102	Inf	0.0116102	1	1	azetidine-2-carboxylic acid acetyltransferase activity
set1∆	Sense	Upregulated	MF	GO:0004131	0.0116102	Inf	0.0116102	1	1	cytosine deaminase activity
set1∆	Sense	Upregulated	MF	GO:0008484	0.0116102	Inf	0.0116102	1	1	sulfuric ester hydrolase activity
ash2∆	Sense	Upregulated	BP	GO:0044270	0.0116243	14.0027	0.166347	2	51	cellular nitrogen compound catabolic process
set1∆	Antisense	Upregulated	MF	GO:0019001	0.0116322	2.62909	3.71831	9	111	guanyl nucleotide binding
set1∆	Antisense	Upregulated	MF	GO:0005525	0.0116322	2.62909	3.71831	9	111	GTP binding
set1∆	Antisense	Upregulated	MF	GO:0032561	0.0116322	2.62909	3.71831	9	111	guanyl ribonucleotide binding
spp1∆	Antisense	Upregulated	MF	GO:0016879	0.0118602	3.42799	1.91854	6	144	ligase activity, forming carbon-nitrogen bonds
swd1∆	Sense	Upregulated	BP	GO:0046466	0.0118614	172.667	0.0118956	1	2	membrane lipid catabolic process
swd1∆	Sense	Upregulated	BP	GO:0030149	0.0118614	172.667	0.0118956	1	2	sphingolipid catabolic process
swd1∆	Sense	Upregulated	BP	GO:0051084	0.0118614	172.667	0.0118956	1	2	'de novo' posttranslational protein folding
swd1∆	Sense	Upregulated	BP	GO:0006664	0.0118614	172.667	0.0118956	1	2	glycolipid metabolic process
shg1∆	Sense	Downregulated	BP	GO:0060249	0.0118956	Inf	0.0118956	1	62	anatomical structure homeostasis
set1∆	Antisense	Upregulated	BP	GO:0031573	0.0119935	7.43787	0.495012	3	15	intra-S DNA damage checkpoint
set1∆	Antisense	Upregulated	BP	GO:0009411	0.0119935	7.43787	0.495012	3	15	response to UV
set1∆	Antisense	Upregulated	BP	GO:0009416	0.0119935	7.43787	0.495012	3	15	response to light stimulus
sdc1∆	Sense	Downregulated	BP	GO:0015804	0.0120319	108.271	0.0120875	1	7	neutral amino acid transport
swd2∆	Sense	Upregulated	BP	GO:0006116	0.0120319	108.271	0.0120875	1	7	NADH oxidation
sdc1∆	Sense	Upregulated	BP	GO:0034614	0.0120662	13.72	0.169609	2	17	cellular response to reactive oxygen species
sdc1∆	Sense	Upregulated	BP	GO:0006094	0.0120662	13.72	0.169609	2	17	gluconeogenesis
swd2∆	Antisense	Upregulated	CC	GO:0005960	0.0121153	116.467	0.0121673	1	4	glycine cleavage complex
swd2∆	Antisense	Upregulated	CC	GO:0033193	0.0121153	116.467	0.0121673	1	4	Lsd1/2 complex
swd2∆	Antisense	Upregulated	MF	GO:0032453	0.0121291	116.333	0.0121812	1	4	histone demethylase activity (H3-K4 specific)
swd2∆	Antisense	Upregulated	MF	GO:0004525	0.0121291	116.333	0.0121812	1	4	ribonuclease III activity
swd2∆	Antisense	Upregulated	MF	GO:0016723	0.0121291	116.333	0.0121812	1	4	oxidoreductase activity, oxidizing metal ions, NAD or NADP as acceptor
swd1∆	Sense	Upregulated	CC	GO:0000015	0.0121314	168.613	0.0121673	1	2	phosphopyruvate hydratase complex
swd1∆	Sense	Upregulated	MF	GO:0008131	0.0121453	168.419	0.0121812	1	2	primary amine oxidase activity
swd1∆	Sense	Upregulated	MF	GO:0004634	0.0121453	168.419	0.0121812	1	2	phosphopyruvate hydratase activity
swd1∆	Sense	Upregulated	MF	GO:0004371	0.0121453	168.419	0.0121812	1	2	glycerone kinase activity
swd1∆	Sense	Upregulated	MF	GO:0009013	0.0121453	168.419	0.0121812	1	2	succinate-semialdehyde dehydrogenase [NAD(P)+] activity
swd1∆	Sense	Upregulated	MF	GO:0003935	0.0121453	168.419	0.0121812	1	2	GTP cyclohydrolase II activity
set1∆	Antisense	Upregulated	BP	GO:0009205	0.0121513	1.99875	8.6462	16	262	purine ribonucleoside triphosphate metabolic process
swd2∆	Antisense	Upregulated	BP	GO:0009071	0.0122264	115.4	0.0122794	1	4	serine family amino acid catabolic process
swd2∆	Antisense	Upregulated	BP	GO:0033499	0.0122264	115.4	0.0122794	1	4	galactose catabolic process via UDP-galactose
swd2∆	Antisense	Upregulated	BP	GO:0033169	0.0122264	115.4	0.0122794	1	4	histone H3-K9 demethylation
swd2∆	Antisense	Upregulated	BP	GO:0019464	0.0122264	115.4	0.0122794	1	4	glycine decarboxylation via glycine cleavage system
swd2∆	Antisense	Upregulated	BP	GO:0006546	0.0122264	115.4	0.0122794	1	4	glycine catabolic process
sdc1∆	Antisense	Downregulated	BP	GO:0051278	0.0122264	115.4	0.0122794	1	16	fungal-type cell wall polysaccharide biosynthetic process
sdc1∆	Sense	Downregulated	MF	GO:0022857	0.0123005	7.98876	0.513894	3	270	transmembrane transporter activity
set1∆	Antisense	Downregulated	CC	GO:0030132	0.0123011	109.229	0.0123574	1	5	clathrin coat of coated pit
set1∆	Antisense	Downregulated	CC	GO:0030139	0.0123011	109.229	0.0123574	1	5	endocytic vesicle
set1∆	Antisense	Downregulated	MF	GO:0004596	0.0123151	109.104	0.0123715	1	5	peptide alpha-N-acetyltransferase activity
shg1∆	Sense	Downregulated	MF	GO:0008094	0.0123715	Inf	0.0123715	1	65	DNA-dependent ATPase activity
swd1∆	Sense	Downregulated	BP	GO:0006220	0.0124139	108.229	0.0124712	1	13	pyrimidine nucleotide metabolic process
spp1∆	Antisense	Upregulated	MF	GO:0016780	0.0124145	13.8316	0.173201	2	13	phosphotransferase activity, for other substituted phosphate groups
set1∆	Antisense	Upregulated	MF	GO:0005096	0.0124212	3.98372	1.40693	5	42	GTPase activator activity
set1∆	Sense	Downregulated	MF	GO:0046873	0.0124352	13.3154	0.171679	2	41	metal ion transmembrane transporter activity
set1∆	Sense	Downregulated	MF	GO:0015343	0.0125117	124.524	0.0125619	1	3	siderophore transmembrane transporter activity
set1∆	Sense	Downregulated	MF	GO:0042927	0.0125117	124.524	0.0125619	1	3	siderophore transporter activity
set1∆	Sense	Downregulated	MF	GO:0003933	0.0125117	124.524	0.0125619	1	3	GTP cyclohydrolase activity
set1∆	Antisense	Upregulated	BP	GO:0009199	0.0125714	1.99024	8.6792	16	263	ribonucleoside triphosphate metabolic process
set1∆	Sense	Downregulated	BP	GO:0043620	0.0126121	123.524	0.0126631	1	3	regulation of DNA-dependent transcription in response to stress
set1∆	Sense	Downregulated	BP	GO:0043618	0.0126121	123.524	0.0126631	1	3	regulation of transcription from RNA polymerase II promoter in response to stress
set1∆	Sense	Downregulated	BP	GO:0034224	0.0126121	123.524	0.0126631	1	3	cellular response to zinc ion starvation
shg1∆	Antisense	Upregulated	BP	GO:0051234	0.0127309	2.73282	4.71278	10	847	establishment of localization
swd1∆	Sense	Upregulated	CC	GO:0044444	0.012981	3.63263	23.2943	29	3829	cytoplasmic part
swd3∆	Sense	Upregulated	BP	GO:0019674	0.0129868	108.167	0.0130468	1	17	NAD metabolic process
ash2∆	Sense	Upregulated	BP	GO:0019563	0.0129868	108.167	0.0130468	1	4	glycerol catabolic process
set1∆	Antisense	Upregulated	BP	GO:0009144	0.0130029	1.9818	8.7122	16	264	purine nucleoside triphosphate metabolic process
spp1∆	Antisense	Upregulated	BP	GO:0018108	0.0132387	Inf	0.0132387	1	1	peptidyl-tyrosine phosphorylation
spp1∆	Antisense	Upregulated	BP	GO:0035025	0.0132387	Inf	0.0132387	1	1	positive regulation of Rho protein signal transduction
spp1∆	Antisense	Upregulated	BP	GO:0000770	0.0132387	Inf	0.0132387	1	1	peptide pheromone export
spp1∆	Antisense	Upregulated	BP	GO:0042989	0.0132387	Inf	0.0132387	1	1	sequestering of actin monomers
spp1∆	Antisense	Upregulated	BP	GO:0035195	0.0132387	Inf	0.0132387	1	1	gene silencing by miRNA
spp1∆	Antisense	Upregulated	BP	GO:0035196	0.0132387	Inf	0.0132387	1	1	production of miRNAs involved in gene silencing by miRNA
swd1∆	Sense	Downregulated	CC	GO:0034708	0.0132423	100.808	0.013308	1	14	methyltransferase complex
sdc1∆	Sense	Downregulated	MF	GO:0043140	0.0132549	97	0.0133232	1	7	ATP-dependent 3'-5' DNA helicase activity
sdc1∆	Sense	Downregulated	MF	GO:0043138	0.0132549	97	0.0133232	1	7	3'-5' DNA helicase activity
spp1∆	Antisense	Upregulated	MF	GO:0005337	0.0133232	Inf	0.0133232	1	1	nucleoside transmembrane transporter activity
spp1∆	Antisense	Upregulated	MF	GO:0004715	0.0133232	Inf	0.0133232	1	1	non-membrane spanning protein tyrosine kinase activity
spp1∆	Antisense	Upregulated	MF	GO:0004731	0.0133232	Inf	0.0133232	1	1	purine-nucleoside phosphorylase activity
spp1∆	Antisense	Upregulated	MF	GO:0016421	0.0133232	Inf	0.0133232	1	1	CoA carboxylase activity
spp1∆	Antisense	Upregulated	MF	GO:0016295	0.0133232	Inf	0.0133232	1	1	myristoyl-[acyl-carrier-protein] hydrolase activity
spp1∆	Antisense	Upregulated	MF	GO:0016296	0.0133232	Inf	0.0133232	1	1	palmitoyl-[acyl-carrier-protein] hydrolase activity
spp1∆	Antisense	Upregulated	MF	GO:0016297	0.0133232	Inf	0.0133232	1	1	acyl-[acyl-carrier-protein] hydrolase activity
spp1∆	Antisense	Upregulated	MF	GO:0004635	0.0133232	Inf	0.0133232	1	1	phosphoribosyl-AMP cyclohydrolase activity
spp1∆	Antisense	Upregulated	MF	GO:0004636	0.0133232	Inf	0.0133232	1	1	phosphoribosyl-ATP diphosphatase activity
spp1∆	Antisense	Upregulated	MF	GO:0015211	0.0133232	Inf	0.0133232	1	1	purine nucleoside transmembrane transporter activity
spp1∆	Antisense	Upregulated	MF	GO:0004366	0.0133232	Inf	0.0133232	1	1	glycerol-3-phosphate O-acyltransferase activity
spp1∆	Antisense	Upregulated	MF	GO:0004357	0.0133232	Inf	0.0133232	1	1	glutamate-cysteine ligase activity
spp1∆	Antisense	Upregulated	MF	GO:0004320	0.0133232	Inf	0.0133232	1	1	oleoyl-[acyl-carrier-protein] hydrolase activity
spp1∆	Antisense	Upregulated	MF	GO:0050839	0.0133232	Inf	0.0133232	1	1	cell adhesion molecule binding
spp1∆	Antisense	Upregulated	MF	GO:0004313	0.0133232	Inf	0.0133232	1	1	[acyl-carrier-protein] S-acetyltransferase activity
spp1∆	Antisense	Upregulated	MF	GO:0004317	0.0133232	Inf	0.0133232	1	1	3-hydroxypalmitoyl-[acyl-carrier-protein] dehydratase activity
spp1∆	Antisense	Upregulated	MF	GO:0004318	0.0133232	Inf	0.0133232	1	1	enoyl-[acyl-carrier-protein] reductase (NADH) activity
spp1∆	Antisense	Upregulated	MF	GO:0046911	0.0133232	Inf	0.0133232	1	1	metal chelating activity
spp1∆	Antisense	Upregulated	MF	GO:0004168	0.0133232	Inf	0.0133232	1	1	dolichol kinase activity
spp1∆	Antisense	Upregulated	MF	GO:0003989	0.0133232	Inf	0.0133232	1	1	acetyl-CoA carboxylase activity
swd1∆	Sense	Downregulated	BP	GO:0051568	0.0133637	99.8846	0.0134305	1	14	histone H3-K4 methylation
sdc1∆	Sense	Upregulated	BP	GO:0032787	0.0133867	4.74813	0.927859	4	93	monocarboxylic acid metabolic process
ash2∆	Sense	Downregulated	BP	GO:0034968	0.0133867	152.235	0.0134305	1	35	histone lysine methylation
swd2∆	Sense	Downregulated	BP	GO:0034968	0.0133867	152.235	0.0134305	1	35	histone lysine methylation
swd3∆	Sense	Downregulated	BP	GO:0034968	0.0133867	152.235	0.0134305	1	35	histone lysine methylation
sdc1∆	Sense	Upregulated	BP	GO:0045454	0.0134885	12.86	0.179586	2	18	cell redox homeostasis
spp1∆	Antisense	Upregulated	CC	GO:0033263	0.0134981	Inf	0.0134981	1	1	CORVET complex
swd2∆	Antisense	Upregulated	CC	GO:0051286	0.0136217	7.01566	0.51711	3	170	cell tip
ash2∆	Antisense	Upregulated	BP	GO:0010608	0.0136224	Inf	0.0136224	1	71	posttranscriptional regulation of gene expression
set1∆	Antisense	Upregulated	MF	GO:0000287	0.0136843	3.87812	1.44043	5	43	magnesium ion binding
spp1∆	Antisense	Upregulated	MF	GO:0016874	0.0137152	2.98566	2.57137	7	193	ligase activity
swd2∆	Sense	Upregulated	BP	GO:0006734	0.0137402	92.7857	0.0138143	1	8	NADH metabolic process
sdc1∆	Antisense	Downregulated	BP	GO:0034406	0.0137468	101.784	0.0138143	1	18	cell wall beta-glucan metabolic process
set1∆	Antisense	Upregulated	BP	GO:0050896	0.0137671	1.578	25.0806	36	760	response to stimulus
ash2∆	Sense	Downregulated	BP	GO:0009063	0.0137679	147.857	0.0138143	1	36	cellular amino acid catabolic process
swd3∆	Antisense	Upregulated	BP	GO:0044272	0.0137679	147.857	0.0138143	1	36	sulfur compound biosynthetic process
set1∆	Antisense	Upregulated	BP	GO:0006351	0.0137945	1.71376	15.8404	25	480	transcription, DNA-dependent
ash2∆	Antisense	Upregulated	BP	GO:0006401	0.0138143	Inf	0.0138143	1	72	RNA catabolic process
set1∆	Antisense	Upregulated	BP	GO:0006974	0.0138274	2.06879	7.29317	14	221	response to DNA damage stimulus
swd1∆	Sense	Upregulated	BP	GO:0005975	0.0139587	3.94191	1.46316	5	246	carbohydrate metabolic process
spp1∆	Sense	Upregulated	BP	GO:0006405	0.0140621	12.7419	0.18419	2	64	RNA export from nucleus
set1∆	Antisense	Upregulated	BP	GO:0043547	0.0141584	3.83924	1.45203	5	44	positive regulation of GTPase activity
swd1∆	Antisense	Upregulated	MF	GO:0016423	0.0141989	93.4821	0.0142748	1	5	tRNA (guanine) methyltransferase activity
set1∆	Antisense	Upregulated	BP	GO:0000075	0.0142178	2.71362	3.20107	8	97	cell cycle checkpoint
sdc1∆	Sense	Upregulated	CC	GO:0044444	0.0142935	2.41921	37.8532	45	3829	cytoplasmic part
swd1∆	Sense	Upregulated	BP	GO:0044275	0.0143022	12.2521	0.184382	2	31	cellular carbohydrate catabolic process
spp1∆	Sense	Upregulated	BP	GO:0000711	0.0143127	92.7321	0.0143899	1	5	meiotic DNA repair synthesis
swd1∆	Antisense	Upregulated	BP	GO:0051071	0.0143127	92.7321	0.0143899	1	5	4,6-pyruvylated galactose residue metabolic process
swd1∆	Antisense	Upregulated	BP	GO:0051072	0.0143127	92.7321	0.0143899	1	5	4,6-pyruvylated galactose residue biosynthetic process
set1∆	Antisense	Upregulated	BP	GO:0009314	0.0144088	6.86436	0.528012	3	16	response to radiation
spp1∆	Sense	Upregulated	BP	GO:0051236	0.0144844	12.5372	0.187068	2	65	establishment of RNA localization
spp1∆	Sense	Upregulated	BP	GO:0050657	0.0144844	12.5372	0.187068	2	65	nucleic acid transport
spp1∆	Sense	Upregulated	BP	GO:0050658	0.0144844	12.5372	0.187068	2	65	RNA transport
sdc1∆	Antisense	Downregulated	BP	GO:0070592	0.0145063	96.1111	0.0145817	1	19	cell wall polysaccharide biosynthetic process
swd2∆	Sense	Upregulated	MF	GO:0004022	0.014572	87.2833	0.0146555	1	7	alcohol dehydrogenase (NAD) activity
set1∆	Antisense	Downregulated	CC	GO:0000127	0.0147445	87.3667	0.0148289	1	6	transcription factor TFIIIC complex
set1∆	Sense	Downregulated	BP	GO:0006810	0.0147574	3.08543	3.45702	8	819	transport
set1∆	Antisense	Downregulated	MF	GO:0034212	0.0147613	87.2667	0.0148458	1	6	peptide N-acetyltransferase activity
shg1∆	Sense	Upregulated	BP	GO:0000726	0.0148795	86.5667	0.0149655	1	13	non-recombinational repair
set1∆	Antisense	Upregulated	BP	GO:0006012	0.0148812	14.8118	0.198005	2	6	galactose metabolic process
sdc1∆	Sense	Downregulated	CC	GO:0048188	0.0151183	83.2222	0.0152091	1	8	Set1C/COMPASS complex
sdc1∆	Sense	Downregulated	CC	GO:0035097	0.0151183	83.2222	0.0152091	1	8	histone methyltransferase complex
ash2∆	Sense	Upregulated	MF	GO:0016616	0.0151312	12.117	0.190902	2	59	oxidoreductase activity, acting on the CH-OH group of donors, NAD or NADP as acceptor
sdc1∆	Sense	Downregulated	MF	GO:0051183	0.0151355	83.127	0.0152265	1	8	vitamin transporter activity
swd2∆	Sense	Upregulated	MF	GO:0022892	0.0151648	7.18702	0.550628	3	263	substrate-specific transporter activity
swd1∆	Antisense	Upregulated	BP	GO:0006200	0.0152547	6.77297	0.541059	3	188	ATP catabolic process
swd2∆	Antisense	Upregulated	BP	GO:0019388	0.0152611	86.5333	0.0153492	1	5	galactose catabolic process
sdc1∆	Antisense	Downregulated	BP	GO:0051274	0.0152654	91.0351	0.0153492	1	20	beta-glucan biosynthetic process
set1∆	Antisense	Upregulated	CC	GO:0032300	0.0152812	14.5977	0.20076	2	6	mismatch repair complex
ash2∆	Sense	Downregulated	BP	GO:0046395	0.0152918	132.59	0.0153492	1	40	carboxylic acid catabolic process
ash2∆	Sense	Downregulated	BP	GO:0016054	0.0152918	132.59	0.0153492	1	40	organic acid catabolic process
ash2∆	Sense	Downregulated	BP	GO:0009310	0.0152918	132.59	0.0153492	1	40	amine catabolic process
swd2∆	Antisense	Upregulated	CC	GO:0030427	0.0154178	6.6844	0.541445	3	178	site of polarized growth
swd2∆	Sense	Downregulated	MF	GO:0046873	0.0155477	130.3	0.0156072	1	41	metal ion transmembrane transporter activity
swd3∆	Sense	Downregulated	MF	GO:0046873	0.0155477	130.3	0.0156072	1	41	metal ion transmembrane transporter activity
set1∆	Antisense	Upregulated	BP	GO:0032774	0.0155654	1.69329	16.0054	25	485	RNA biosynthetic process
shg1∆	Sense	Downregulated	MF	GO:0008026	0.0156072	Inf	0.0156072	1	82	ATP-dependent helicase activity
shg1∆	Sense	Downregulated	MF	GO:0070035	0.0156072	Inf	0.0156072	1	82	purine NTP-dependent helicase activity
spp1∆	Sense	Upregulated	BP	GO:0006403	0.0157846	11.9604	0.195702	2	68	RNA localization
shg1∆	Antisense	Upregulated	MF	GO:0031177	0.0159058	96.7407	0.0159878	1	3	phosphopantetheine binding
shg1∆	Sense	Upregulated	BP	GO:0000731	0.0160164	79.8923	0.0161167	1	14	DNA synthesis involved in DNA repair
ash2∆	Sense	Upregulated	BP	GO:0046174	0.0162087	81.1094	0.0163085	1	5	polyol catabolic process
ash2∆	Sense	Upregulated	BP	GO:0019405	0.0162087	81.1094	0.0163085	1	5	alditol catabolic process
ash2∆	Sense	Upregulated	BP	GO:0006538	0.0162087	81.1094	0.0163085	1	5	glutamate catabolic process
spp1∆	Antisense	Upregulated	BP	GO:0006464	0.0163608	2.03764	8.36685	15	632	cellular protein modification process
ash2∆	Sense	Upregulated	BP	GO:0019318	0.0163685	11.6068	0.198964	2	61	hexose metabolic process
sdc1∆	Sense	Upregulated	BP	GO:0000302	0.0165391	11.4267	0.19954	2	20	response to reactive oxygen species
shg1∆	Antisense	Upregulated	BP	GO:0019184	0.0166027	92.5179	0.0166922	1	3	nonribosomal peptide biosynthetic process
shg1∆	Antisense	Upregulated	BP	GO:0019290	0.0166027	92.5179	0.0166922	1	3	siderophore biosynthetic process
shg1∆	Antisense	Upregulated	BP	GO:0009237	0.0166027	92.5179	0.0166922	1	3	siderophore metabolic process
sdc1∆	Antisense	Upregulated	MF	GO:0016620	0.0166379	74.8	0.0167491	1	11	oxidoreductase activity, acting on the aldehyde or oxo group of donors, NAD or NADP as acceptor
set1∆	Sense	Downregulated	MF	GO:0004845	0.016649	83	0.0167491	1	4	uracil phosphoribosyltransferase activity
sdc1∆	Sense	Upregulated	MF	GO:0051082	0.0167092	6.06358	0.544347	3	55	unfolded protein binding
set1∆	Sense	Downregulated	BP	GO:0019563	0.0167823	82.3333	0.0168841	1	4	glycerol catabolic process
set1∆	Sense	Downregulated	BP	GO:0000722	0.0167823	82.3333	0.0168841	1	4	telomere maintenance via recombination
set1∆	Sense	Downregulated	BP	GO:0031647	0.0167823	82.3333	0.0168841	1	4	regulation of protein stability
set1∆	Sense	Downregulated	BP	GO:0015891	0.0167823	82.3333	0.0168841	1	4	siderophore transport
set1∆	Sense	Downregulated	BP	GO:0006862	0.0167823	82.3333	0.0168841	1	4	nucleotide transport
swd1∆	Antisense	Upregulated	CC	GO:0005664	0.0169968	74.8571	0.0171103	1	6	nuclear origin of replication recognition complex
swd1∆	Antisense	Upregulated	CC	GO:0005881	0.0169968	74.8571	0.0171103	1	6	cytoplasmic microtubule
swd1∆	Antisense	Upregulated	CC	GO:0000808	0.0169968	74.8571	0.0171103	1	6	origin recognition complex
swd1∆	Antisense	Downregulated	CC	GO:0030479	0.0170387	118.5	0.0171103	1	45	actin cortical patch
set1∆	Antisense	Upregulated	BP	GO:0032313	0.0170794	6.37278	0.561013	3	17	regulation of Rab GTPase activity
set1∆	Antisense	Upregulated	BP	GO:0032482	0.0170794	6.37278	0.561013	3	17	Rab protein signal transduction
set1∆	Antisense	Upregulated	BP	GO:0032483	0.0170794	6.37278	0.561013	3	17	regulation of Rab protein signal transduction
spp1∆	Sense	Upregulated	BP	GO:0015931	0.0171335	11.4337	0.204336	2	71	nucleobase-containing compound transport
swd1∆	Antisense	Upregulated	BP	GO:0010608	0.0171335	11.4337	0.204336	2	71	posttranscriptional regulation of gene expression
spp1∆	Sense	Upregulated	BP	GO:0000730	0.0171522	74.1714	0.0172678	1	6	DNA recombinase assembly
spp1∆	Sense	Upregulated	BP	GO:0032120	0.0171522	74.1714	0.0172678	1	6	ascospore-type prospore membrane assembly
spp1∆	Sense	Upregulated	BP	GO:0045003	0.0171522	74.1714	0.0172678	1	6	double-strand break repair via synthesis-dependent strand annealing
spp1∆	Sense	Upregulated	BP	GO:0051260	0.0171522	74.1714	0.0172678	1	6	protein homooligomerization
swd1∆	Antisense	Upregulated	BP	GO:0043331	0.0171522	74.1714	0.0172678	1	6	response to dsRNA
swd1∆	Antisense	Upregulated	BP	GO:0030422	0.0171522	74.1714	0.0172678	1	6	production of siRNA involved in RNA interference
swd1∆	Antisense	Upregulated	BP	GO:0032220	0.0171522	74.1714	0.0172678	1	6	plasma membrane fusion involved in cytogamy
swd1∆	Antisense	Upregulated	BP	GO:0045026	0.0171522	74.1714	0.0172678	1	6	plasma membrane fusion
swd1∆	Antisense	Upregulated	BP	GO:0006829	0.0171522	74.1714	0.0172678	1	6	zinc ion transport
swd1∆	Antisense	Upregulated	BP	GO:0031050	0.0171522	74.1714	0.0172678	1	6	dsRNA fragmentation
swd1∆	Sense	Downregulated	BP	GO:0046112	0.0171555	76.3235	0.0172678	1	18	nucleobase biosynthetic process
set1∆	Antisense	Downregulated	MF	GO:0031490	0.0172019	72.7083	0.0173201	1	7	chromatin DNA binding
sdc1∆	Antisense	Downregulated	MF	GO:0015926	0.0174008	79.2121	0.0175105	1	23	glucosidase activity
swd1∆	Antisense	Downregulated	CC	GO:0030864	0.0174157	115.844	0.0174905	1	46	cortical actin cytoskeleton
swd3∆	Antisense	Upregulated	CC	GO:0030864	0.0174157	115.844	0.0174905	1	46	cortical actin cytoskeleton
shg1∆	Sense	Downregulated	MF	GO:0004386	0.0175105	Inf	0.0175105	1	92	helicase activity
ash2∆	Sense	Downregulated	BP	GO:0016571	0.0175754	114.778	0.0176516	1	46	histone methylation
swd1∆	Antisense	Downregulated	BP	GO:0007015	0.0175754	114.778	0.0176516	1	46	actin filament organization
swd2∆	Sense	Downregulated	BP	GO:0016571	0.0175754	114.778	0.0176516	1	46	histone methylation
swd3∆	Sense	Downregulated	BP	GO:0016571	0.0175754	114.778	0.0176516	1	46	histone methylation
ash2∆	Sense	Upregulated	MF	GO:0016614	0.0176604	11.129	0.20708	2	64	oxidoreductase activity, acting on CH-OH group of donors
swd1∆	Sense	Upregulated	BP	GO:0019660	0.0177409	86.3167	0.0178434	1	3	glycolytic fermentation
swd1∆	Sense	Upregulated	BP	GO:0019655	0.0177409	86.3167	0.0178434	1	3	glucose catabolic process to ethanol
swd1∆	Sense	Upregulated	BP	GO:0000955	0.0177409	86.3167	0.0178434	1	3	amino acid catabolic process via Ehrlich pathway
swd1∆	Sense	Upregulated	BP	GO:0000947	0.0177409	86.3167	0.0178434	1	3	amino acid catabolic process to alcohol via Ehrlich pathway
swd1∆	Sense	Upregulated	BP	GO:0031990	0.0177409	86.3167	0.0178434	1	3	mRNA export from nucleus in response to heat stress
set1∆	Sense	Downregulated	BP	GO:0051234	0.0179323	2.96339	3.57521	8	847	establishment of localization
set1∆	Antisense	Upregulated	BP	GO:0000724	0.0179742	4.42063	1.02302	4	31	double-strand break repair via homologous recombination
set1∆	Sense	Upregulated	MF	GO:0016814	0.0180035	10.9682	0.208984	2	18	hydrolase activity, acting on carbon-nitrogen (but not peptide) bonds, in cyclic amidines
swd1∆	Sense	Downregulated	BP	GO:0006206	0.0181017	72.0694	0.0182272	1	19	pyrimidine nucleobase metabolic process
sdc1∆	Antisense	Upregulated	MF	GO:0019239	0.0181384	67.987	0.0182718	1	12	deaminase activity
swd2∆	Antisense	Upregulated	MF	GO:0008409	0.0181418	69.7733	0.0182718	1	6	5'-3' exonuclease activity
swd2∆	Antisense	Upregulated	MF	GO:0016722	0.0181418	69.7733	0.0182718	1	6	oxidoreductase activity, oxidizing metal ions
swd1∆	Sense	Upregulated	MF	GO:0003959	0.0181642	84.1935	0.0182718	1	3	NADPH dehydrogenase activity
swd1∆	Sense	Upregulated	MF	GO:0003933	0.0181642	84.1935	0.0182718	1	3	GTP cyclohydrolase activity
sdc1∆	Sense	Upregulated	BP	GO:0019319	0.0181646	10.8232	0.209517	2	21	hexose biosynthetic process
swd2∆	Antisense	Upregulated	BP	GO:0043331	0.018287	69.2133	0.018419	1	6	response to dsRNA
swd2∆	Antisense	Upregulated	BP	GO:0006012	0.018287	69.2133	0.018419	1	6	galactose metabolic process
swd2∆	Antisense	Upregulated	BP	GO:0030422	0.018287	69.2133	0.018419	1	6	production of siRNA involved in RNA interference
swd2∆	Antisense	Upregulated	BP	GO:0031050	0.018287	69.2133	0.018419	1	6	dsRNA fragmentation
swd2∆	Antisense	Upregulated	BP	GO:0006790	0.0183902	10.936	0.211819	2	69	sulfur compound metabolic process
set1∆	Antisense	Upregulated	BP	GO:0006163	0.0184027	1.85749	9.83423	17	298	purine nucleotide metabolic process
shg1∆	Antisense	Upregulated	CC	GO:0009986	0.0184199	5.92038	0.567871	3	103	cell surface
shg1∆	Sense	Upregulated	BP	GO:0022402	0.0184953	8.4827	0.635457	3	552	cell cycle process
sdc1∆	Antisense	Downregulated	BP	GO:0065008	0.0185731	16.36	0.231773	2	302	regulation of biological quality
ash2∆	Sense	Downregulated	BP	GO:0009064	0.0187162	107.542	0.0188028	1	49	glutamine family amino acid metabolic process
swd1∆	Antisense	Upregulated	BP	GO:0046034	0.018733	6.24625	0.584229	3	203	ATP metabolic process
swd2∆	Sense	Upregulated	MF	GO:0008270	0.0188258	6.59707	0.596688	3	285	zinc ion binding
sdc1∆	Sense	Downregulated	MF	GO:0015103	0.018887	64.6296	0.0190331	1	10	inorganic anion transmembrane transporter activity
swd1∆	Antisense	Downregulated	CC	GO:0030863	0.0189228	106.306	0.0190114	1	50	cortical cytoskeleton
swd3∆	Antisense	Upregulated	CC	GO:0030863	0.0189228	106.306	0.0190114	1	50	cortical cytoskeleton
swd1∆	Sense	Upregulated	BP	GO:0009063	0.0190239	10.4402	0.214121	2	36	cellular amino acid catabolic process
set1∆	Sense	Upregulated	BP	GO:0006206	0.019039	10.6006	0.215081	2	19	pyrimidine nucleobase metabolic process
swd1∆	Antisense	Downregulated	BP	GO:0006575	0.0190963	105.327	0.0191865	1	50	cellular modified amino acid metabolic process
swd3∆	Antisense	Upregulated	BP	GO:0006575	0.0190963	105.327	0.0191865	1	50	cellular modified amino acid metabolic process
swd3∆	Antisense	Upregulated	MF	GO:0008092	0.0193214	104.04	0.0194138	1	51	cytoskeletal protein binding
swd2∆	Antisense	Upregulated	BP	GO:0010558	0.0193381	6.11355	0.589409	3	192	negative regulation of macromolecule biosynthetic process
swd2∆	Antisense	Upregulated	BP	GO:0010608	0.0194105	10.6149	0.217959	2	71	posttranscriptional regulation of gene expression
ash2∆	Sense	Upregulated	BP	GO:0006067	0.0194206	64.875	0.0195702	1	6	ethanol metabolic process
ash2∆	Sense	Upregulated	BP	GO:0006113	0.0194206	64.875	0.0195702	1	6	fermentation
ash2∆	Sense	Upregulated	BP	GO:0034308	0.0194206	64.875	0.0195702	1	6	primary alcohol metabolic process
swd1∆	Sense	Upregulated	MF	GO:0050662	0.0194445	5.76837	0.578607	3	95	coenzyme binding
ash2∆	Sense	Downregulated	BP	GO:0044270	0.0194763	103.2	0.0195702	1	51	cellular nitrogen compound catabolic process
set1∆	Antisense	Downregulated	CC	GO:0005905	0.0196146	62.381	0.0197719	1	8	coated pit
set1∆	Antisense	Downregulated	CC	GO:0048188	0.0196146	62.381	0.0197719	1	8	Set1C/COMPASS complex
set1∆	Antisense	Downregulated	CC	GO:0035097	0.0196146	62.381	0.0197719	1	8	histone methyltransferase complex
set1∆	Antisense	Downregulated	MF	GO:0018024	0.0196368	62.3095	0.0197944	1	8	histone-lysine N-methyltransferase activity
set1∆	Antisense	Downregulated	MF	GO:0043022	0.0196368	62.3095	0.0197944	1	8	ribosome binding
set1∆	Antisense	Downregulated	MF	GO:0042054	0.0196368	62.3095	0.0197944	1	8	histone methyltransferase activity
sdc1∆	Sense	Upregulated	CC	GO:0000015	0.019676	102.098	0.0197719	1	2	phosphopyruvate hydratase complex
sdc1∆	Sense	Upregulated	MF	GO:0019825	0.0196984	101.98	0.0197944	1	2	oxygen binding
sdc1∆	Sense	Upregulated	MF	GO:0050236	0.0196984	101.98	0.0197944	1	2	pyridoxine:NADP 4-dehydrogenase activity
sdc1∆	Sense	Upregulated	MF	GO:0004634	0.0196984	101.98	0.0197944	1	2	phosphopyruvate hydratase activity
sdc1∆	Sense	Upregulated	MF	GO:0016724	0.0196984	101.98	0.0197944	1	2	oxidoreductase activity, oxidizing metal ions, oxygen as acceptor
sdc1∆	Sense	Upregulated	MF	GO:0019166	0.0196984	101.98	0.0197944	1	2	trans-2-enoyl-CoA reductase (NADPH) activity
sdc1∆	Sense	Upregulated	MF	GO:0004322	0.0196984	101.98	0.0197944	1	2	ferroxidase activity
sdc1∆	Sense	Upregulated	MF	GO:0004339	0.0196984	101.98	0.0197944	1	2	glucan 1,4-alpha-glucosidase activity
sdc1∆	Sense	Upregulated	MF	GO:0051213	0.0196984	101.98	0.0197944	1	2	dioxygenase activity
sdc1∆	Sense	Upregulated	MF	GO:0009013	0.0196984	101.98	0.0197944	1	2	succinate-semialdehyde dehydrogenase [NAD(P)+] activity
spp1∆	Sense	Upregulated	CC	GO:0031105	0.0198032	62.369	0.019962	1	7	septin complex
swd1∆	Antisense	Upregulated	CC	GO:0005937	0.0198032	62.369	0.019962	1	7	mating projection
swd1∆	Antisense	Upregulated	CC	GO:0042995	0.0198032	62.369	0.019962	1	7	cell projection
sdc1∆	Antisense	Downregulated	BP	GO:0051273	0.0198108	69.1067	0.019954	1	26	beta-glucan metabolic process
spp1∆	Sense	Upregulated	MF	GO:0008143	0.0198256	62.2976	0.0199848	1	7	poly(A) RNA binding
spp1∆	Sense	Upregulated	MF	GO:0070717	0.0198256	62.2976	0.0199848	1	7	poly-purine tract binding
swd1∆	Antisense	Upregulated	MF	GO:0005385	0.0198256	62.2976	0.0199848	1	7	zinc ion transmembrane transporter activity
set1∆	Sense	Downregulated	BP	GO:0070585	0.0198548	10.28	0.219493	2	52	protein localization to mitochondrion
set1∆	Sense	Downregulated	BP	GO:0006626	0.0198548	10.28	0.219493	2	52	protein targeting to mitochondrion
sdc1∆	Sense	Upregulated	BP	GO:0042759	0.0198563	101.157	0.019954	1	2	long-chain fatty acid biosynthetic process
sdc1∆	Sense	Upregulated	BP	GO:0042821	0.0198563	101.157	0.019954	1	2	pyridoxal biosynthetic process
sdc1∆	Sense	Upregulated	BP	GO:0070627	0.0198563	101.157	0.019954	1	2	ferrous iron import
sdc1∆	Sense	Upregulated	BP	GO:0051084	0.0198563	101.157	0.019954	1	2	'de novo' posttranslational protein folding
sdc1∆	Sense	Upregulated	BP	GO:0015684	0.0198563	101.157	0.019954	1	2	ferrous iron transport
sdc1∆	Sense	Upregulated	BP	GO:0051409	0.0198563	101.157	0.019954	1	2	response to nitrosative stress
swd3∆	Antisense	Upregulated	BP	GO:0007163	0.0198563	101.157	0.019954	1	52	establishment or maintenance of cell polarity
set1∆	Sense	Upregulated	CC	GO:0005576	0.0199302	10.333	0.220342	2	19	extracellular region
spp1∆	Sense	Upregulated	BP	GO:0043487	0.0199841	61.7976	0.0201458	1	7	regulation of RNA stability
spp1∆	Sense	Upregulated	BP	GO:0043488	0.0199841	61.7976	0.0201458	1	7	regulation of mRNA stability
swd1∆	Antisense	Upregulated	BP	GO:0000755	0.0199841	61.7976	0.0201458	1	7	cytogamy
swd1∆	Antisense	Upregulated	BP	GO:0000742	0.0199841	61.7976	0.0201458	1	7	karyogamy involved in conjugation with cellular fusion
swd1∆	Antisense	Upregulated	BP	GO:0090052	0.0199841	61.7976	0.0201458	1	7	regulation of chromatin silencing at centromere
swd1∆	Antisense	Upregulated	BP	GO:0051017	0.0199841	61.7976	0.0201458	1	7	actin filament bundle assembly
swd1∆	Antisense	Upregulated	BP	GO:0016441	0.0199841	61.7976	0.0201458	1	7	posttranscriptional gene silencing
swd1∆	Antisense	Upregulated	BP	GO:0035194	0.0199841	61.7976	0.0201458	1	7	posttranscriptional gene silencing by RNA
swd1∆	Antisense	Upregulated	BP	GO:0016246	0.0199841	61.7976	0.0201458	1	7	RNA interference
set1∆	Antisense	Upregulated	BP	GO:0006312	0.0200075	5.94675	0.594014	3	18	mitotic recombination
set1∆	Antisense	Upregulated	BP	GO:0090052	0.0203853	11.8471	0.231005	2	7	regulation of chromatin silencing at centromere
swd2∆	Sense	Upregulated	BP	GO:0006091	0.0203954	11.1495	0.227936	2	132	generation of precursor metabolites and energy
swd2∆	Antisense	Upregulated	BP	GO:0009056	0.0204967	3.53475	2.33308	6	760	catabolic process
set1∆	Antisense	Downregulated	BP	GO:0045727	0.0205472	59	0.0207214	1	9	positive regulation of translation
set1∆	Antisense	Downregulated	BP	GO:0006284	0.0205472	59	0.0207214	1	9	base-excision repair
sdc1∆	Antisense	Downregulated	BP	GO:0010383	0.0205668	66.4359	0.0207214	1	27	cell wall polysaccharide metabolic process
ash2∆	Sense	Upregulated	BP	GO:0006766	0.0206659	10.205	0.225058	2	69	vitamin metabolic process
ash2∆	Sense	Upregulated	BP	GO:0006767	0.0206659	10.205	0.225058	2	69	water-soluble vitamin metabolic process
spp1∆	Antisense	Upregulated	BP	GO:0032319	0.0206659	10.205	0.225058	2	17	regulation of Rho GTPase activity
spp1∆	Antisense	Upregulated	BP	GO:0043412	0.02067	1.93529	9.39946	16	710	macromolecule modification
shg1∆	Sense	Downregulated	BP	GO:0006310	0.0207214	Inf	0.0207214	1	108	DNA recombination
set1∆	Antisense	Upregulated	MF	GO:0003682	0.0208165	5.85318	0.602969	3	18	chromatin binding
swd1∆	Sense	Downregulated	BP	GO:0034654	0.0209357	61.7381	0.0211051	1	22	nucleobase-containing compound biosynthetic process
swd1∆	Sense	Downregulated	BP	GO:0034404	0.0209357	61.7381	0.0211051	1	22	nucleobase-containing small molecule biosynthetic process
set1∆	Sense	Downregulated	BP	GO:0046174	0.0209357	61.7381	0.0211051	1	5	polyol catabolic process
set1∆	Sense	Downregulated	BP	GO:0033214	0.0209357	61.7381	0.0211051	1	5	iron assimilation by chelation and transport
set1∆	Sense	Downregulated	BP	GO:0019405	0.0209357	61.7381	0.0211051	1	5	alditol catabolic process
set1∆	Antisense	Upregulated	BP	GO:0009150	0.0209787	1.86292	9.20721	16	279	purine ribonucleotide metabolic process
ash2∆	Antisense	Downregulated	BP	GO:0016192	0.0210072	15.275	0.247122	2	322	vesicle-mediated transport
spp1∆	Sense	Upregulated	BP	GO:0048869	0.0210185	5.96651	0.61013	3	212	cellular developmental process
swd2∆	Antisense	Upregulated	CC	GO:0000145	0.0211114	58.2	0.0212928	1	7	exocyst
swd2∆	Antisense	Upregulated	MF	GO:0031491	0.0211353	58.1333	0.0213171	1	7	nucleosome binding
shg1∆	Antisense	Upregulated	MF	GO:0000036	0.0211533	64.4815	0.0213171	1	4	ACP phosphopantetheine attachment site binding involved in fatty acid biosynthetic process
shg1∆	Antisense	Upregulated	MF	GO:0051377	0.0211533	64.4815	0.0213171	1	4	mannose-ethanolamine phosphotransferase activity
shg1∆	Antisense	Upregulated	MF	GO:0008496	0.0211533	64.4815	0.0213171	1	4	mannan endo-1,6-alpha-mannosidase activity
swd2∆	Antisense	Upregulated	BP	GO:0090052	0.0213041	57.6667	0.0214889	1	7	regulation of chromatin silencing at centromere
swd2∆	Antisense	Upregulated	BP	GO:0016441	0.0213041	57.6667	0.0214889	1	7	posttranscriptional gene silencing
swd2∆	Antisense	Upregulated	BP	GO:0035194	0.0213041	57.6667	0.0214889	1	7	posttranscriptional gene silencing by RNA
swd2∆	Antisense	Upregulated	BP	GO:0016246	0.0213041	57.6667	0.0214889	1	7	RNA interference
swd2∆	Antisense	Upregulated	BP	GO:0043043	0.0213041	57.6667	0.0214889	1	7	peptide biosynthetic process
swd2∆	Antisense	Upregulated	BP	GO:0070076	0.0213041	57.6667	0.0214889	1	7	histone lysine demethylation
sdc1∆	Sense	Upregulated	BP	GO:0006633	0.0216085	9.78857	0.22947	2	23	fatty acid biosynthetic process
shg1∆	Sense	Upregulated	BP	GO:0040020	0.0216845	57.6444	0.0218726	1	19	regulation of meiosis
sdc1∆	Sense	Upregulated	BP	GO:0006066	0.0218503	3.39003	1.61627	5	162	alcohol metabolic process
shg1∆	Antisense	Upregulated	CC	GO:0031362	0.0218777	62.2381	0.0220532	1	4	anchored to external side of plasma membrane
set1∆	Antisense	Downregulated	CC	GO:0031248	0.0220413	54.5729	0.0222433	1	9	protein acetyltransferase complex
set1∆	Antisense	Downregulated	CC	GO:0030131	0.0220413	54.5729	0.0222433	1	9	clathrin adaptor complex
set1∆	Antisense	Downregulated	CC	GO:0031414	0.0220413	54.5729	0.0222433	1	9	N-terminal protein acetyltransferase complex
swd3∆	Sense	Upregulated	BP	GO:0006007	0.0220776	61.6667	0.0222563	1	29	glucose catabolic process
shg1∆	Antisense	Upregulated	BP	GO:0051692	0.0220776	61.6667	0.0222563	1	4	cellular oligosaccharide catabolic process
shg1∆	Antisense	Upregulated	BP	GO:0000752	0.0220776	61.6667	0.0222563	1	4	agglutination involved in conjugation with cellular fusion
shg1∆	Antisense	Upregulated	BP	GO:0000771	0.0220776	61.6667	0.0222563	1	4	agglutination involved in conjugation
shg1∆	Antisense	Upregulated	BP	GO:0007157	0.0220776	61.6667	0.0222563	1	4	heterophilic cell-cell adhesion
spp1∆	Sense	Upregulated	BP	GO:0000279	0.0221033	4.50703	1.12817	4	392	M phase
swd2∆	Antisense	Upregulated	BP	GO:0009890	0.0221176	5.79474	0.620107	3	202	negative regulation of biosynthetic process
swd2∆	Antisense	Upregulated	BP	GO:0031327	0.0221176	5.79474	0.620107	3	202	negative regulation of cellular biosynthetic process
spp1∆	Antisense	Upregulated	BP	GO:0055085	0.0222024	2.69222	2.83308	7	214	transmembrane transport
set1∆	Sense	Downregulated	MF	GO:0005524	0.0223266	3.225	2.30719	6	551	ATP binding
ash2∆	Sense	Upregulated	MF	GO:0019238	0.0224434	54.4896	0.0226494	1	7	cyclohydrolase activity
ash2∆	Antisense	Upregulated	BP	GO:0032268	0.0224482	Inf	0.0224482	1	117	regulation of cellular protein metabolic process
set1∆	Sense	Downregulated	MF	GO:0032559	0.0225096	3.21841	2.31138	6	552	adenyl ribonucleotide binding
set1∆	Sense	Upregulated	BP	GO:0042886	0.0225141	88.8276	0.0226401	1	2	amide transport
set1∆	Sense	Upregulated	BP	GO:0046487	0.0225141	88.8276	0.0226401	1	2	glyoxylate metabolic process
set1∆	Sense	Upregulated	BP	GO:0045744	0.0225141	88.8276	0.0226401	1	2	negative regulation of G-protein coupled receptor protein signaling pathway
set1∆	Sense	Upregulated	BP	GO:0090029	0.0225141	88.8276	0.0226401	1	2	negative regulation of pheromone-dependent signal transduction involved in conjugation with cellular fusion
set1∆	Sense	Upregulated	BP	GO:0015878	0.0225141	88.8276	0.0226401	1	2	biotin transport
set1∆	Sense	Upregulated	BP	GO:0009436	0.0225141	88.8276	0.0226401	1	2	glyoxylate catabolic process
set1∆	Sense	Upregulated	BP	GO:0006562	0.0225141	88.8276	0.0226401	1	2	proline catabolic process
swd1∆	Antisense	Downregulated	BP	GO:0009108	0.0225141	88.8276	0.0226401	1	59	coenzyme biosynthetic process
swd3∆	Antisense	Upregulated	BP	GO:0009108	0.0225141	88.8276	0.0226401	1	59	coenzyme biosynthetic process
spp1∆	Sense	Upregulated	CC	GO:0032156	0.0226022	53.449	0.0228137	1	8	septin cytoskeleton
set1∆	Antisense	Upregulated	BP	GO:0022402	0.0226152	1.60138	18.2164	27	552	cell cycle process
ash2∆	Sense	Upregulated	BP	GO:0006116	0.0226226	54.0521	0.0228319	1	7	NADH oxidation
ash2∆	Sense	Upregulated	BP	GO:0006771	0.0226226	54.0521	0.0228319	1	7	riboflavin metabolic process
ash2∆	Sense	Upregulated	BP	GO:0009231	0.0226226	54.0521	0.0228319	1	7	riboflavin biosynthetic process
sdc1∆	Sense	Downregulated	MF	GO:0016638	0.0226256	52.8586	0.0228397	1	12	oxidoreductase activity, acting on the CH-NH2 group of donors
set1∆	Antisense	Downregulated	BP	GO:0006303	0.0228062	52.4343	0.0230238	1	10	double-strand break repair via nonhomologous end joining
spp1∆	Sense	Upregulated	BP	GO:0051259	0.0228084	52.9592	0.0230238	1	8	protein oligomerization
swd1∆	Antisense	Upregulated	BP	GO:0006544	0.0228084	52.9592	0.0230238	1	8	glycine metabolic process
swd1∆	Sense	Upregulated	MF	GO:0043167	0.0228116	2.81125	2.92349	7	480	ion binding
swd1∆	Sense	Upregulated	MF	GO:0043169	0.0228116	2.81125	2.92349	7	480	cation binding
swd1∆	Sense	Downregulated	BP	GO:0006879	0.0228214	56.3478	0.0230238	1	24	cellular iron ion homeostasis
swd1∆	Sense	Downregulated	BP	GO:0055072	0.0228214	56.3478	0.0230238	1	24	iron ion homeostasis
sdc1∆	Antisense	Downregulated	BP	GO:0009250	0.0228323	59.5287	0.0230238	1	30	glucan biosynthetic process
set1∆	Antisense	Upregulated	CC	GO:0005886	0.0229707	2.04047	6.29049	12	188	plasma membrane
sdc1∆	Sense	Downregulated	MF	GO:0022804	0.0229768	10.238	0.241721	2	127	active transmembrane transporter activity
ash2∆	Sense	Upregulated	CC	GO:0005829	0.0230419	3.10687	7.42376	12	2297	cytosol
set1∆	Sense	Upregulated	MF	GO:0070635	0.0230878	86.5333	0.0232204	1	2	nicotinamide riboside hydrolase activity
set1∆	Sense	Upregulated	MF	GO:0070636	0.0230878	86.5333	0.0232204	1	2	nicotinic acid riboside hydrolase activity
set1∆	Sense	Upregulated	MF	GO:0030247	0.0230878	86.5333	0.0232204	1	2	polysaccharide binding
set1∆	Sense	Upregulated	MF	GO:0008721	0.0230878	86.5333	0.0232204	1	2	D-serine ammonia-lyase activity
set1∆	Sense	Upregulated	MF	GO:0050263	0.0230878	86.5333	0.0232204	1	2	ribosylpyrimidine nucleosidase activity
set1∆	Sense	Upregulated	MF	GO:0001871	0.0230878	86.5333	0.0232204	1	2	pattern binding
set1∆	Sense	Upregulated	MF	GO:0016206	0.0230878	86.5333	0.0232204	1	2	catechol O-methyltransferase activity
set1∆	Sense	Upregulated	MF	GO:0015225	0.0230878	86.5333	0.0232204	1	2	biotin transporter activity
set1∆	Sense	Upregulated	MF	GO:0047964	0.0230878	86.5333	0.0232204	1	2	glyoxylate reductase activity
set1∆	Sense	Upregulated	MF	GO:0045437	0.0230878	86.5333	0.0232204	1	2	uridine nucleosidase activity
swd1∆	Sense	Upregulated	BP	GO:0046395	0.0232099	9.33394	0.237913	2	40	carboxylic acid catabolic process
swd1∆	Sense	Upregulated	BP	GO:0016054	0.0232099	9.33394	0.237913	2	40	organic acid catabolic process
swd1∆	Sense	Upregulated	BP	GO:0009310	0.0232099	9.33394	0.237913	2	40	amine catabolic process
ash2∆	Sense	Downregulated	BP	GO:0008213	0.0232728	85.8333	0.0234075	1	61	protein alkylation
ash2∆	Sense	Downregulated	BP	GO:0006479	0.0232728	85.8333	0.0234075	1	61	protein methylation
swd2∆	Sense	Downregulated	BP	GO:0008213	0.0232728	85.8333	0.0234075	1	61	protein alkylation
swd2∆	Sense	Downregulated	BP	GO:0006479	0.0232728	85.8333	0.0234075	1	61	protein methylation
swd3∆	Sense	Downregulated	BP	GO:0008213	0.0232728	85.8333	0.0234075	1	61	protein alkylation
swd3∆	Sense	Downregulated	BP	GO:0006479	0.0232728	85.8333	0.0234075	1	61	protein methylation
shg1∆	Sense	Upregulated	BP	GO:0016071	0.0235724	11.4954	0.252111	2	219	mRNA metabolic process
swd1∆	Sense	Downregulated	MF	GO:0046915	0.0235749	54.4271	0.0237914	1	25	transition metal ion transmembrane transporter activity
swd1∆	Sense	Upregulated	BP	GO:0019563	0.0235866	57.5333	0.0237913	1	4	glycerol catabolic process
swd1∆	Sense	Upregulated	BP	GO:0015711	0.0235866	57.5333	0.0237913	1	4	organic anion transport
swd1∆	Sense	Upregulated	BP	GO:0016139	0.0235866	57.5333	0.0237913	1	4	glycoside catabolic process
ash2∆	Antisense	Upregulated	BP	GO:0051246	0.0235994	Inf	0.0235994	1	123	regulation of protein metabolic process
swd1∆	Sense	Downregulated	MF	GO:0022857	0.0237313	12.3905	0.256947	2	270	transmembrane transporter activity
set1∆	Sense	Upregulated	MF	GO:0050662	0.0238843	3.93445	1.10297	4	95	coenzyme binding
set1∆	Antisense	Upregulated	BP	GO:0007093	0.0239097	2.90206	2.24405	6	68	mitotic cell cycle checkpoint
swd1∆	Sense	Upregulated	MF	GO:0004845	0.0241476	56.1183	0.0243624	1	4	uracil phosphoribosyltransferase activity
swd1∆	Sense	Upregulated	MF	GO:0016832	0.0241476	56.1183	0.0243624	1	4	aldehyde-lyase activity
spp1∆	Sense	Upregulated	BP	GO:0032502	0.0242998	5.62896	0.644666	3	224	developmental process
swd2∆	Antisense	Upregulated	BP	GO:0006544	0.0243126	49.419	0.0245587	1	8	glycine metabolic process
sdc1∆	Antisense	Downregulated	BP	GO:0070589	0.0243404	55.6667	0.0245587	1	32	cellular component macromolecule biosynthetic process
sdc1∆	Antisense	Downregulated	BP	GO:0008360	0.0243404	55.6667	0.0245587	1	32	regulation of cell shape
sdc1∆	Antisense	Downregulated	BP	GO:0044038	0.0243404	55.6667	0.0245587	1	32	cell wall macromolecule biosynthetic process
set1∆	Sense	Downregulated	BP	GO:0000723	0.0243772	9.16786	0.24482	2	58	telomere maintenance
set1∆	Sense	Downregulated	BP	GO:0032200	0.0243772	9.16786	0.24482	2	58	telomere organization
set1∆	Sense	Upregulated	MF	GO:0048037	0.0244436	3.27057	1.66026	5	143	cofactor binding
shg1∆	Antisense	Upregulated	BP	GO:0032318	0.0244782	9.06702	0.24482	2	44	regulation of Ras GTPase activity
sdc1∆	Sense	Downregulated	MF	GO:0051184	0.0244901	48.4444	0.0247431	1	13	cofactor transporter activity
set1∆	Antisense	Upregulated	CC	GO:0044427	0.0247344	1.66382	14.1871	22	424	chromosomal part
set1∆	Sense	Downregulated	MF	GO:0015606	0.0248739	49.781	0.0251237	1	6	spermidine transmembrane transporter activity
set1∆	Antisense	Upregulated	BP	GO:0009259	0.0250536	1.81908	9.40522	16	285	ribonucleotide metabolic process
set1∆	Antisense	Downregulated	BP	GO:0006384	0.0250604	47.1818	0.0253262	1	11	transcription initiation from RNA polymerase III promoter
swd2∆	Antisense	Upregulated	MF	GO:0008026	0.0250606	9.21071	0.249715	2	82	ATP-dependent helicase activity
swd2∆	Antisense	Upregulated	MF	GO:0070035	0.0250606	9.21071	0.249715	2	82	purine NTP-dependent helicase activity
set1∆	Sense	Downregulated	BP	GO:0015848	0.0250723	49.381	0.0253262	1	6	spermidine transport
set1∆	Sense	Downregulated	BP	GO:0006829	0.0250723	49.381	0.0253262	1	6	zinc ion transport
swd1∆	Antisense	Upregulated	MF	GO:0016887	0.0252129	5.54535	0.653788	3	229	ATPase activity
set1∆	Antisense	Upregulated	CC	GO:0005634	0.025278	1.36865	88.7696	102	2653	nucleus
spp1∆	Antisense	Upregulated	BP	GO:0006629	0.0253876	2.61321	2.91251	7	220	lipid metabolic process
spp1∆	Sense	Upregulated	MF	GO:0003727	0.0254224	46.7054	0.0256947	1	9	single-stranded RNA binding
swd1∆	Antisense	Upregulated	MF	GO:0003688	0.0254224	46.7054	0.0256947	1	9	DNA replication origin binding
spp1∆	Antisense	Upregulated	BP	GO:0035023	0.0255473	9.00088	0.251535	2	19	regulation of Rho protein signal transduction
spp1∆	Antisense	Upregulated	BP	GO:0006518	0.0255473	9.00088	0.251535	2	19	peptide metabolic process
ash2∆	Sense	Upregulated	MF	GO:0008171	0.0256107	46.6964	0.025885	1	8	O-methyltransferase activity
ash2∆	Sense	Upregulated	MF	GO:0004364	0.0256107	46.6964	0.025885	1	8	glutathione transferase activity
sdc1∆	Antisense	Upregulated	MF	GO:0016903	0.0256107	46.6964	0.025885	1	17	oxidoreductase activity, acting on the aldehyde or oxo group of donors
sdc1∆	Sense	Downregulated	BP	GO:0009065	0.025625	46.3304	0.0259018	1	15	glutamine family amino acid catabolic process
swd2∆	Sense	Upregulated	BP	GO:0031048	0.025625	46.3304	0.0259018	1	15	chromatin silencing by small RNA
swd1∆	Antisense	Upregulated	BP	GO:0031445	0.025625	46.3304	0.0259018	1	9	regulation of heterochromatin assembly
swd1∆	Antisense	Upregulated	BP	GO:0017148	0.025625	46.3304	0.0259018	1	9	negative regulation of translation
swd1∆	Antisense	Upregulated	BP	GO:0031935	0.025625	46.3304	0.0259018	1	9	regulation of chromatin silencing
ash2∆	Sense	Upregulated	BP	GO:0042726	0.0258148	46.3214	0.0260936	1	8	flavin-containing compound metabolic process
ash2∆	Sense	Upregulated	BP	GO:0042727	0.0258148	46.3214	0.0260936	1	8	flavin-containing compound biosynthetic process
ash2∆	Sense	Upregulated	BP	GO:0006734	0.0258148	46.3214	0.0260936	1	8	NADH metabolic process
swd3∆	Sense	Upregulated	BP	GO:0046496	0.0258468	52.2727	0.0260936	1	34	nicotinamide nucleotide metabolic process
swd3∆	Sense	Upregulated	BP	GO:0019320	0.0258468	52.2727	0.0260936	1	34	hexose catabolic process
spp1∆	Antisense	Upregulated	MF	GO:0022857	0.0260566	2.42403	3.59726	8	270	transmembrane transporter activity
shg1∆	Sense	Upregulated	BP	GO:0051445	0.0261994	47.1273	0.0264774	1	23	regulation of meiotic cell cycle
swd3∆	Antisense	Upregulated	BP	GO:0006790	0.0263046	75.6176	0.0264774	1	69	sulfur compound metabolic process
spp1∆	Antisense	Upregulated	BP	GO:0051238	0.0263046	75.6176	0.0264774	1	2	sequestering of metal ion
spp1∆	Antisense	Upregulated	BP	GO:0018212	0.0263046	75.6176	0.0264774	1	2	peptidyl-tyrosine modification
spp1∆	Antisense	Upregulated	BP	GO:0042759	0.0263046	75.6176	0.0264774	1	2	long-chain fatty acid biosynthetic process
spp1∆	Antisense	Upregulated	BP	GO:0019539	0.0263046	75.6176	0.0264774	1	2	siderophore biosynthetic process from hydroxamic acid
spp1∆	Antisense	Upregulated	BP	GO:0031168	0.0263046	75.6176	0.0264774	1	2	ferrichrome metabolic process
spp1∆	Antisense	Upregulated	BP	GO:0031169	0.0263046	75.6176	0.0264774	1	2	ferrichrome biosynthetic process
spp1∆	Antisense	Upregulated	BP	GO:0051664	0.0263046	75.6176	0.0264774	1	2	nuclear pore localization
spp1∆	Antisense	Upregulated	BP	GO:0006437	0.0263046	75.6176	0.0264774	1	2	tyrosyl-tRNA aminoacylation
spp1∆	Antisense	Upregulated	BP	GO:0031660	0.0263046	75.6176	0.0264774	1	2	regulation of cyclin-dependent protein serine/threonine kinase activity involved in G2/M transition of mitotic cell cycle
spp1∆	Antisense	Upregulated	BP	GO:0006880	0.0263046	75.6176	0.0264774	1	2	intracellular sequestering of iron ion
spp1∆	Antisense	Upregulated	BP	GO:0006821	0.0263046	75.6176	0.0264774	1	2	chloride transport
spp1∆	Antisense	Upregulated	BP	GO:0009268	0.0263046	75.6176	0.0264774	1	2	response to pH
spp1∆	Antisense	Upregulated	BP	GO:0031081	0.0263046	75.6176	0.0264774	1	2	nuclear pore distribution
sdc1∆	Sense	Downregulated	CC	GO:0034708	0.0263217	44.7607	0.026616	1	14	methyltransferase complex
shg1∆	Antisense	Upregulated	MF	GO:0004713	0.0263738	48.3519	0.0266464	1	5	protein tyrosine kinase activity
shg1∆	Antisense	Upregulated	MF	GO:0004559	0.0263738	48.3519	0.0266464	1	5	alpha-mannosidase activity
set1∆	Sense	Upregulated	MF	GO:0051287	0.026388	8.7678	0.255424	2	22	NAD binding
swd1∆	Antisense	Downregulated	CC	GO:0015629	0.0264414	75.2029	0.026616	1	70	actin cytoskeleton
swd3∆	Antisense	Upregulated	CC	GO:0015629	0.0264414	75.2029	0.026616	1	70	actin cytoskeleton
set1∆	Antisense	Upregulated	CC	GO:0051286	0.026451	2.06499	5.68821	11	170	cell tip
spp1∆	Antisense	Upregulated	MF	GO:0003785	0.0264714	75.1159	0.0266464	1	2	actin monomer binding
spp1∆	Antisense	Upregulated	MF	GO:0016420	0.0264714	75.1159	0.0266464	1	2	malonyltransferase activity
spp1∆	Antisense	Upregulated	MF	GO:0004075	0.0264714	75.1159	0.0266464	1	2	biotin carboxylase activity
spp1∆	Antisense	Upregulated	MF	GO:0004831	0.0264714	75.1159	0.0266464	1	2	tyrosine-tRNA ligase activity
spp1∆	Antisense	Upregulated	MF	GO:0016418	0.0264714	75.1159	0.0266464	1	2	S-acetyltransferase activity
spp1∆	Antisense	Upregulated	MF	GO:0016419	0.0264714	75.1159	0.0266464	1	2	S-malonyltransferase activity
spp1∆	Antisense	Upregulated	MF	GO:0004047	0.0264714	75.1159	0.0266464	1	2	aminomethyltransferase activity
spp1∆	Antisense	Upregulated	MF	GO:0005254	0.0264714	75.1159	0.0266464	1	2	chloride channel activity
spp1∆	Antisense	Upregulated	MF	GO:0005247	0.0264714	75.1159	0.0266464	1	2	voltage-gated chloride channel activity
spp1∆	Antisense	Upregulated	MF	GO:0030586	0.0264714	75.1159	0.0266464	1	2	[methionine synthase] reductase activity
spp1∆	Antisense	Upregulated	MF	GO:0004321	0.0264714	75.1159	0.0266464	1	2	fatty-acyl-CoA synthase activity
spp1∆	Antisense	Upregulated	MF	GO:0004314	0.0264714	75.1159	0.0266464	1	2	[acyl-carrier-protein] S-malonyltransferase activity
spp1∆	Antisense	Upregulated	MF	GO:0019171	0.0264714	75.1159	0.0266464	1	2	3-hydroxyacyl-[acyl-carrier-protein] dehydratase activity
spp1∆	Antisense	Upregulated	MF	GO:0030620	0.0264714	75.1159	0.0266464	1	2	U2 snRNA binding
spp1∆	Antisense	Upregulated	MF	GO:0016885	0.0264714	75.1159	0.0266464	1	2	ligase activity, forming carbon-carbon bonds
spp1∆	Antisense	Upregulated	MF	GO:0009019	0.0264714	75.1159	0.0266464	1	2	tRNA (guanine-N1-)-methyltransferase activity
swd3∆	Sense	Upregulated	BP	GO:0009820	0.0265993	50.7255	0.0268611	1	35	alkaloid metabolic process
swd3∆	Sense	Upregulated	BP	GO:0006769	0.0265993	50.7255	0.0268611	1	35	nicotinamide metabolic process
spp1∆	Antisense	Upregulated	CC	GO:0032541	0.0268165	74.1143	0.0269962	1	2	cortical endoplasmic reticulum
spp1∆	Antisense	Upregulated	CC	GO:0017109	0.0268165	74.1143	0.0269962	1	2	glutamate-cysteine ligase complex
spp1∆	Antisense	Upregulated	CC	GO:0034702	0.0268165	74.1143	0.0269962	1	2	ion channel complex
spp1∆	Antisense	Upregulated	CC	GO:0034707	0.0268165	74.1143	0.0269962	1	2	chloride channel complex
spp1∆	Antisense	Upregulated	CC	GO:0005846	0.0268165	74.1143	0.0269962	1	2	nuclear cap binding complex
spp1∆	Antisense	Upregulated	CC	GO:0005835	0.0268165	74.1143	0.0269962	1	2	fatty acid synthase complex
set1∆	Antisense	Downregulated	CC	GO:0030125	0.0268781	43.6417	0.0271863	1	11	clathrin vesicle coat
swd2∆	Antisense	Upregulated	MF	GO:0032452	0.0270966	43.5833	0.0274077	1	9	histone demethylase activity
sdc1∆	Antisense	Upregulated	MF	GO:0016814	0.0270991	43.9412	0.0274077	1	18	hydrolase activity, acting on carbon-nitrogen (but not peptide) bonds, in cyclic amidines
shg1∆	Sense	Upregulated	MF	GO:0008483	0.0271094	45.4348	0.0274077	1	24	transaminase activity
ash2∆	Sense	Upregulated	BP	GO:0005996	0.0272587	8.74701	0.260936	2	80	monosaccharide metabolic process
shg1∆	Antisense	Upregulated	CC	GO:0043332	0.0272745	46.6696	0.0275665	1	5	mating projection tip
shg1∆	Antisense	Upregulated	CC	GO:0044463	0.0272745	46.6696	0.0275665	1	5	cell projection part
shg1∆	Antisense	Upregulated	CC	GO:0005783	0.0272863	2.73019	3.04886	7	553	endoplasmic reticulum
swd2∆	Antisense	Upregulated	BP	GO:0031445	0.0273124	43.2333	0.0276285	1	9	regulation of heterochromatin assembly
swd2∆	Antisense	Upregulated	BP	GO:0006904	0.0273124	43.2333	0.0276285	1	9	vesicle docking involved in exocytosis
swd2∆	Antisense	Upregulated	BP	GO:0006749	0.0273124	43.2333	0.0276285	1	9	glutathione metabolic process
swd2∆	Antisense	Upregulated	BP	GO:0017148	0.0273124	43.2333	0.0276285	1	9	negative regulation of translation
swd2∆	Antisense	Upregulated	BP	GO:0031935	0.0273124	43.2333	0.0276285	1	9	regulation of chromatin silencing
spp1∆	Sense	Upregulated	BP	GO:0051168	0.0273146	8.82973	0.261896	2	91	nuclear export
sdc1∆	Antisense	Upregulated	BP	GO:0006144	0.027315	43.5882	0.0276285	1	18	purine nucleobase metabolic process
swd3∆	Sense	Upregulated	BP	GO:0009063	0.0273514	49.2667	0.0276285	1	36	cellular amino acid catabolic process
swd3∆	Sense	Upregulated	BP	GO:0019362	0.0273514	49.2667	0.0276285	1	36	pyridine nucleotide metabolic process
set1∆	Antisense	Upregulated	MF	GO:0030983	0.0273533	9.71648	0.267986	2	8	mismatched DNA binding
set1∆	Sense	Upregulated	BP	GO:0043094	0.0273678	8.57477	0.260361	2	23	cellular metabolic compound salvage
spp1∆	Antisense	Upregulated	MF	GO:0005215	0.0273781	2.27288	4.33003	9	325	transporter activity
shg1∆	Antisense	Upregulated	BP	GO:0033214	0.027523	46.2411	0.0278204	1	5	iron assimilation by chelation and transport
sdc1∆	Sense	Upregulated	BP	GO:0009628	0.0275813	4.95335	0.65848	3	66	response to abiotic stimulus
set1∆	Sense	Downregulated	BP	GO:0060249	0.0276057	8.55	0.261704	2	62	anatomical structure homeostasis
swd2∆	Sense	Upregulated	MF	GO:0022804	0.027644	9.09867	0.265893	2	127	active transmembrane transporter activity
set1∆	Antisense	Upregulated	BP	GO:0051716	0.0276934	1.51688	22.8365	32	692	cellular response to stimulus
swd1∆	Sense	Upregulated	MF	GO:0005275	0.0277865	8.42439	0.261896	2	43	amine transmembrane transporter activity
swd2∆	Antisense	Upregulated	BP	GO:0010605	0.0279836	5.26958	0.678434	3	221	negative regulation of macromolecule metabolic process
sdc1∆	Antisense	Downregulated	BP	GO:0006073	0.0281031	47.8889	0.028396	1	37	cellular glucan metabolic process
sdc1∆	Antisense	Downregulated	BP	GO:0044042	0.0281031	47.8889	0.028396	1	37	glucan metabolic process
swd1∆	Antisense	Downregulated	BP	GO:0006897	0.0281971	70.3699	0.028396	1	74	endocytosis
spp1∆	Sense	Upregulated	MF	GO:0004556	0.0282095	41.5079	0.0285497	1	10	alpha-amylase activity
spp1∆	Sense	Upregulated	MF	GO:0016160	0.0282095	41.5079	0.0285497	1	10	amylase activity
swd1∆	Antisense	Upregulated	MF	GO:0005381	0.0282095	41.5079	0.0285497	1	10	iron ion transmembrane transporter activity
swd1∆	Antisense	Upregulated	MF	GO:0003777	0.0282095	41.5079	0.0285497	1	10	microtubule motor activity
sdc1∆	Sense	Downregulated	MF	GO:0008509	0.0282095	41.5079	0.0285497	1	15	anion transmembrane transporter activity
shg1∆	Sense	Upregulated	MF	GO:0003690	0.0282255	43.5333	0.0285497	1	25	double-stranded DNA binding
shg1∆	Sense	Upregulated	MF	GO:0003697	0.0282255	43.5333	0.0285497	1	25	single-stranded DNA binding
swd1∆	Antisense	Upregulated	BP	GO:0000741	0.0284341	41.1746	0.0287797	1	10	karyogamy
ash2∆	Sense	Upregulated	MF	GO:0015203	0.0287682	40.8516	0.0291207	1	9	polyamine transmembrane transporter activity
ash2∆	Sense	Upregulated	MF	GO:0000297	0.0287682	40.8516	0.0291207	1	9	spermine transmembrane transporter activity
swd1∆	Antisense	Downregulated	BP	GO:0010324	0.0289536	68.4667	0.0291635	1	76	membrane invagination
set1∆	Sense	Downregulated	MF	GO:0005385	0.0289617	41.4762	0.029311	1	7	zinc ion transmembrane transporter activity
set1∆	Sense	Downregulated	MF	GO:0043140	0.0289617	41.4762	0.029311	1	7	ATP-dependent 3'-5' DNA helicase activity
set1∆	Sense	Downregulated	MF	GO:0043138	0.0289617	41.4762	0.029311	1	7	3'-5' DNA helicase activity
set1∆	Sense	Downregulated	MF	GO:0019238	0.0289617	41.4762	0.029311	1	7	cyclohydrolase activity
swd2∆	Sense	Upregulated	BP	GO:0019674	0.0289972	40.5234	0.0293553	1	17	NAD metabolic process
swd2∆	Sense	Upregulated	BP	GO:0006096	0.0289972	40.5234	0.0293553	1	17	glycolysis
ash2∆	Sense	Upregulated	BP	GO:0006071	0.0289972	40.5234	0.0293553	1	9	glycerol metabolic process
ash2∆	Sense	Upregulated	BP	GO:0000296	0.0289972	40.5234	0.0293553	1	9	spermine transport
ash2∆	Sense	Upregulated	BP	GO:0015846	0.0289972	40.5234	0.0293553	1	9	polyamine transport
set1∆	Sense	Downregulated	BP	GO:0008655	0.0291923	41.1429	0.0295472	1	7	pyrimidine-containing compound salvage
set1∆	Sense	Downregulated	BP	GO:0006771	0.0291923	41.1429	0.0295472	1	7	riboflavin metabolic process
set1∆	Sense	Downregulated	BP	GO:0009231	0.0291923	41.1429	0.0295472	1	7	riboflavin biosynthetic process
set1∆	Antisense	Downregulated	CC	GO:0030119	0.0292882	39.6667	0.0296578	1	12	AP-type membrane coat adaptor complex
shg1∆	Sense	Upregulated	MF	GO:0016769	0.0293405	41.784	0.0296917	1	26	transferase activity, transferring nitrogenous groups
set1∆	Antisense	Upregulated	CC	GO:0032991	0.0293622	1.36402	58.7559	71	1756	macromolecular complex
swd1∆	Sense	Upregulated	BP	GO:0046352	0.0293985	43.1417	0.0297391	1	5	disaccharide catabolic process
swd1∆	Sense	Upregulated	BP	GO:0046174	0.0293985	43.1417	0.0297391	1	5	polyol catabolic process
swd1∆	Sense	Upregulated	BP	GO:0042026	0.0293985	43.1417	0.0297391	1	5	protein refolding
swd1∆	Sense	Upregulated	BP	GO:0019405	0.0293985	43.1417	0.0297391	1	5	alditol catabolic process
swd1∆	Sense	Upregulated	BP	GO:0006813	0.0293985	43.1417	0.0297391	1	5	potassium ion transport
swd1∆	Sense	Upregulated	BP	GO:0006538	0.0293985	43.1417	0.0297391	1	5	glutamate catabolic process
sdc1∆	Sense	Upregulated	MF	GO:0016631	0.0294043	50.9804	0.0296917	1	3	enoyl-[acyl-carrier-protein] reductase activity
sdc1∆	Sense	Upregulated	MF	GO:0004866	0.0294043	50.9804	0.0296917	1	3	endopeptidase inhibitor activity
sdc1∆	Sense	Upregulated	MF	GO:0051920	0.0294043	50.9804	0.0296917	1	3	peroxiredoxin activity
sdc1∆	Sense	Upregulated	MF	GO:0008379	0.0294043	50.9804	0.0296917	1	3	thioredoxin peroxidase activity
set1∆	Antisense	Downregulated	BP	GO:0000726	0.0295545	39.303	0.0299309	1	13	non-recombinational repair
set1∆	Antisense	Downregulated	BP	GO:0008054	0.0295545	39.303	0.0299309	1	13	cyclin catabolic process
set1∆	Antisense	Downregulated	BP	GO:0018022	0.0295545	39.303	0.0299309	1	13	peptidyl-lysine methylation
ash2∆	Antisense	Downregulated	BP	GO:0045324	0.0296051	45.3509	0.0299309	1	39	late endosome to vacuole transport
sdc1∆	Antisense	Downregulated	BP	GO:0045324	0.0296051	45.3509	0.0299309	1	39	late endosome to vacuole transport
swd3∆	Sense	Upregulated	BP	GO:0019748	0.0296051	45.3509	0.0299309	1	39	secondary metabolic process
sdc1∆	Sense	Upregulated	BP	GO:0070302	0.0296389	50.5686	0.0299309	1	3	regulation of stress-activated protein kinase signaling cascade
sdc1∆	Sense	Upregulated	BP	GO:0019660	0.0296389	50.5686	0.0299309	1	3	glycolytic fermentation
sdc1∆	Sense	Upregulated	BP	GO:0019655	0.0296389	50.5686	0.0299309	1	3	glucose catabolic process to ethanol
sdc1∆	Sense	Upregulated	BP	GO:0042817	0.0296389	50.5686	0.0299309	1	3	pyridoxal metabolic process
sdc1∆	Sense	Upregulated	BP	GO:0052548	0.0296389	50.5686	0.0299309	1	3	regulation of endopeptidase activity
sdc1∆	Sense	Upregulated	BP	GO:0033215	0.0296389	50.5686	0.0299309	1	3	iron assimilation by reduction and transport
sdc1∆	Sense	Upregulated	BP	GO:0000955	0.0296389	50.5686	0.0299309	1	3	amino acid catabolic process via Ehrlich pathway
sdc1∆	Sense	Upregulated	BP	GO:0000947	0.0296389	50.5686	0.0299309	1	3	amino acid catabolic process to alcohol via Ehrlich pathway
sdc1∆	Sense	Upregulated	BP	GO:0031990	0.0296389	50.5686	0.0299309	1	3	mRNA export from nucleus in response to heat stress
sdc1∆	Sense	Upregulated	BP	GO:0010951	0.0296389	50.5686	0.0299309	1	3	negative regulation of endopeptidase activity
set1∆	Antisense	Upregulated	BP	GO:0000725	0.0296447	3.72619	1.18803	4	36	recombinational repair
swd2∆	Sense	Upregulated	BP	GO:0006066	0.0299437	9.00536	0.279739	2	162	alcohol metabolic process
set1∆	Sense	Downregulated	MF	GO:0030554	0.0300398	2.99035	2.46631	6	589	adenyl nucleotide binding
swd2∆	Antisense	Upregulated	MF	GO:0032451	0.0300644	38.7333	0.030453	1	10	demethylase activity
swd2∆	Antisense	Upregulated	MF	GO:0016854	0.0300644	38.7333	0.030453	1	10	racemase and epimerase activity
swd1∆	Antisense	Upregulated	BP	GO:0043414	0.0301657	8.35188	0.276285	2	96	macromolecule methylation
swd1∆	Antisense	Upregulated	BP	GO:0032259	0.0301657	8.35188	0.276285	2	96	methylation
set1∆	Sense	Downregulated	MF	GO:0001883	0.0302644	2.98459	2.4705	6	590	purine nucleoside binding
swd2∆	Antisense	Upregulated	BP	GO:0008214	0.0303036	38.4222	0.0306984	1	10	protein dealkylation
swd2∆	Antisense	Upregulated	BP	GO:0006482	0.0303036	38.4222	0.0306984	1	10	protein demethylation
swd2∆	Antisense	Upregulated	BP	GO:0016577	0.0303036	38.4222	0.0306984	1	10	histone demethylation
swd3∆	Sense	Upregulated	BP	GO:0046395	0.0303554	44.1795	0.0306984	1	40	carboxylic acid catabolic process
swd3∆	Sense	Upregulated	BP	GO:0016054	0.0303554	44.1795	0.0306984	1	40	organic acid catabolic process
swd3∆	Sense	Upregulated	BP	GO:0009310	0.0303554	44.1795	0.0306984	1	40	amine catabolic process
set1∆	Antisense	Upregulated	BP	GO:0051336	0.030667	2.72399	2.37606	6	72	regulation of hydrolase activity
sdc1∆	Sense	Downregulated	BP	GO:0006312	0.0306794	38.1324	0.0310821	1	18	mitotic recombination
swd2∆	Antisense	Upregulated	BP	GO:0031324	0.0306837	5.07488	0.702993	3	229	negative regulation of cellular metabolic process
swd1∆	Antisense	Upregulated	BP	GO:0009154	0.0306893	5.1188	0.705104	3	245	purine ribonucleotide catabolic process
swd1∆	Antisense	Upregulated	BP	GO:0009146	0.0306893	5.1188	0.705104	3	245	purine nucleoside triphosphate catabolic process
swd1∆	Antisense	Upregulated	BP	GO:0009261	0.0306893	5.1188	0.705104	3	245	ribonucleotide catabolic process
swd1∆	Antisense	Upregulated	BP	GO:0009203	0.0306893	5.1188	0.705104	3	245	ribonucleoside triphosphate catabolic process
swd1∆	Antisense	Upregulated	BP	GO:0009207	0.0306893	5.1188	0.705104	3	245	purine ribonucleoside triphosphate catabolic process
swd1∆	Antisense	Upregulated	MF	GO:0016620	0.0309892	37.35	0.0314046	1	11	oxidoreductase activity, acting on the aldehyde or oxo group of donors, NAD or NADP as acceptor
set1∆	Sense	Downregulated	BP	GO:0009628	0.030998	8.00938	0.278588	2	66	response to abiotic stimulus
swd1∆	Antisense	Upregulated	BP	GO:0006195	0.0310142	5.09671	0.707982	3	246	purine nucleotide catabolic process
swd2∆	Antisense	Upregulated	MF	GO:0004386	0.0310352	8.17143	0.280167	2	92	helicase activity
sdc1∆	Antisense	Downregulated	BP	GO:0022603	0.0311054	43.0667	0.0314658	1	41	regulation of anatomical structure morphogenesis
sdc1∆	Antisense	Downregulated	BP	GO:0022604	0.0311054	43.0667	0.0314658	1	41	regulation of cell morphogenesis
swd3∆	Sense	Upregulated	BP	GO:0046165	0.0311054	43.0667	0.0314658	1	41	alcohol biosynthetic process
set1∆	Sense	Upregulated	BP	GO:0019318	0.0311938	4.70597	0.690522	3	61	hexose metabolic process
swd1∆	Antisense	Upregulated	BP	GO:0070192	0.0312356	37.05	0.0316577	1	11	chromosome organization involved in meiosis
swd1∆	Antisense	Upregulated	BP	GO:0007129	0.0312356	37.05	0.0316577	1	11	synapsis
swd1∆	Antisense	Upregulated	BP	GO:0034755	0.0312356	37.05	0.0316577	1	11	iron ion transmembrane transport
swd1∆	Antisense	Upregulated	BP	GO:0030989	0.0312356	37.05	0.0316577	1	11	dynein-driven meiotic oscillatory nuclear movement
set1∆	Antisense	Upregulated	MF	GO:0043566	0.0312557	3.06408	1.77541	5	53	structure-specific DNA binding
sdc1∆	Sense	Upregulated	BP	GO:0046364	0.0312807	7.89846	0.279355	2	28	monosaccharide biosynthetic process
swd1∆	Antisense	Upregulated	BP	GO:0009143	0.0313409	5.0748	0.71086	3	247	nucleoside triphosphate catabolic process
set1∆	Sense	Downregulated	MF	GO:0001882	0.0314046	2.95607	2.49144	6	595	nucleoside binding
swd2∆	Sense	Upregulated	MF	GO:0046914	0.0314269	5.35714	0.7244	3	346	transition metal ion binding
swd1∆	Antisense	Upregulated	MF	GO:0008168	0.0314638	8.15543	0.282642	2	99	methyltransferase activity
shg1∆	Sense	Upregulated	MF	GO:0042803	0.0315675	38.6741	0.0319756	1	28	protein homodimerization activity
set1∆	Antisense	Downregulated	CC	GO:0005680	0.0316928	36.3542	0.0321293	1	13	anaphase-promoting complex
set1∆	Antisense	Downregulated	CC	GO:0030118	0.0316928	36.3542	0.0321293	1	13	clathrin coat
set1∆	Antisense	Downregulated	CC	GO:0030665	0.0316928	36.3542	0.0321293	1	13	clathrin-coated vesicle membrane
set1∆	Antisense	Downregulated	MF	GO:0016278	0.0317285	36.3125	0.032166	1	13	lysine N-methyltransferase activity
set1∆	Antisense	Downregulated	MF	GO:0016279	0.0317285	36.3125	0.032166	1	13	protein-lysine N-methyltransferase activity
spp1∆	Antisense	Upregulated	CC	GO:0005783	0.03175	1.92966	7.46445	13	553	endoplasmic reticulum
set1∆	Antisense	Downregulated	BP	GO:0051568	0.0317944	36.2727	0.0322333	1	14	histone H3-K4 methylation
sdc1∆	Antisense	Downregulated	BP	GO:0044036	0.0318548	42.0081	0.0322333	1	42	cell wall macromolecule metabolic process
swd3∆	Sense	Upregulated	BP	GO:0046365	0.0318548	42.0081	0.0322333	1	42	monosaccharide catabolic process
sdc1∆	Sense	Downregulated	MF	GO:0004857	0.0319162	36.3056	0.0323563	1	17	enzyme inhibitor activity
shg1∆	Sense	Downregulated	MF	GO:0042623	0.032166	Inf	0.032166	1	169	ATPase activity, coupled
ash2∆	Sense	Upregulated	BP	GO:0019400	0.0321698	36.0139	0.032617	1	10	alditol metabolic process
set1∆	Antisense	Upregulated	BP	GO:0016043	0.0322563	1.39153	42.076	53	1275	cellular component organization
swd1∆	Antisense	Upregulated	BP	GO:0009166	0.0323323	5.01012	0.719493	3	250	nucleotide catabolic process
sdc1∆	Sense	Downregulated	BP	GO:0040020	0.032359	36.0069	0.0328089	1	19	regulation of meiosis
shg1∆	Antisense	Upregulated	BP	GO:0050790	0.0325466	4.70751	0.706639	3	127	regulation of catalytic activity
sdc1∆	Antisense	Downregulated	BP	GO:0000271	0.0326039	41	0.0330008	1	43	polysaccharide biosynthetic process
sdc1∆	Antisense	Downregulated	BP	GO:0033692	0.0326039	41	0.0330008	1	43	cellular polysaccharide biosynthetic process
shg1∆	Antisense	Upregulated	CC	GO:0046658	0.0326425	37.3286	0.0330798	1	6	anchored to plasma membrane
shg1∆	Antisense	Upregulated	CC	GO:0031225	0.0326425	37.3286	0.0330798	1	6	anchored to membrane
shg1∆	Antisense	Upregulated	CC	GO:0031233	0.0326425	37.3286	0.0330798	1	6	intrinsic to external side of plasma membrane
shg1∆	Antisense	Upregulated	CC	GO:0070263	0.0326425	37.3286	0.0330798	1	6	external side of fungal-type cell wall
swd1∆	Antisense	Upregulated	MF	GO:0016741	0.0326473	7.98757	0.288352	2	101	transferase activity, transferring one-carbon groups
swd3∆	Antisense	Upregulated	BP	GO:0000902	0.0327316	60.2941	0.0330008	1	86	cell morphogenesis
swd2∆	Antisense	Upregulated	MF	GO:0016788	0.0328381	4.93491	0.721736	3	237	hydrolase activity, acting on ester bonds
swd2∆	Antisense	Upregulated	MF	GO:0050662	0.032929	7.90323	0.289303	2	95	coenzyme binding
shg1∆	Antisense	Upregulated	BP	GO:0016337	0.0329391	36.9857	0.0333845	1	6	cell-cell adhesion
set1∆	Sense	Downregulated	CC	GO:0048188	0.032996	35.585	0.0334601	1	8	Set1C/COMPASS complex
set1∆	Sense	Downregulated	CC	GO:0035097	0.032996	35.585	0.0334601	1	8	histone methyltransferase complex
set1∆	Antisense	Upregulated	BP	GO:0046016	0.0330008	Inf	0.0330008	1	1	positive regulation of transcription by glucose
set1∆	Antisense	Upregulated	BP	GO:0008286	0.0330008	Inf	0.0330008	1	1	insulin receptor signaling pathway
set1∆	Antisense	Upregulated	BP	GO:0043491	0.0330008	Inf	0.0330008	1	1	protein kinase B signaling cascade
set1∆	Antisense	Upregulated	BP	GO:0032007	0.0330008	Inf	0.0330008	1	1	negative regulation of TOR signaling cascade
set1∆	Antisense	Upregulated	BP	GO:0043434	0.0330008	Inf	0.0330008	1	1	response to peptide hormone stimulus
set1∆	Antisense	Upregulated	BP	GO:0000429	0.0330008	Inf	0.0330008	1	1	carbon catabolite regulation of transcription from RNA polymerase II promoter
set1∆	Antisense	Upregulated	BP	GO:0000430	0.0330008	Inf	0.0330008	1	1	regulation of transcription from RNA polymerase II promoter by glucose
set1∆	Antisense	Upregulated	BP	GO:0000432	0.0330008	Inf	0.0330008	1	1	positive regulation of transcription from RNA polymerase II promoter by glucose
set1∆	Antisense	Upregulated	BP	GO:0000436	0.0330008	Inf	0.0330008	1	1	carbon catabolite activation of transcription from RNA polymerase II promoter
set1∆	Antisense	Upregulated	BP	GO:0014065	0.0330008	Inf	0.0330008	1	1	phosphatidylinositol 3-kinase cascade
set1∆	Antisense	Upregulated	BP	GO:0010182	0.0330008	Inf	0.0330008	1	1	sugar mediated signaling pathway
set1∆	Antisense	Upregulated	BP	GO:0016055	0.0330008	Inf	0.0330008	1	1	Wnt receptor signaling pathway
set1∆	Antisense	Upregulated	BP	GO:0010255	0.0330008	Inf	0.0330008	1	1	glucose mediated signaling pathway
set1∆	Antisense	Upregulated	BP	GO:0048009	0.0330008	Inf	0.0330008	1	1	insulin-like growth factor receptor signaling pathway
set1∆	Antisense	Upregulated	BP	GO:0000770	0.0330008	Inf	0.0330008	1	1	peptide pheromone export
set1∆	Antisense	Upregulated	BP	GO:0000736	0.0330008	Inf	0.0330008	1	1	double-strand break repair via single-strand annealing, removal of nonhomologous ends
set1∆	Antisense	Upregulated	BP	GO:0030178	0.0330008	Inf	0.0330008	1	1	negative regulation of Wnt receptor signaling pathway
set1∆	Antisense	Upregulated	BP	GO:0030111	0.0330008	Inf	0.0330008	1	1	regulation of Wnt receptor signaling pathway
set1∆	Antisense	Upregulated	BP	GO:0060191	0.0330008	Inf	0.0330008	1	1	regulation of lipase activity
set1∆	Antisense	Upregulated	BP	GO:0051004	0.0330008	Inf	0.0330008	1	1	regulation of lipoprotein lipase activity
set1∆	Antisense	Upregulated	BP	GO:0035195	0.0330008	Inf	0.0330008	1	1	gene silencing by miRNA
set1∆	Antisense	Upregulated	BP	GO:0035196	0.0330008	Inf	0.0330008	1	1	production of miRNAs involved in gene silencing by miRNA
set1∆	Antisense	Upregulated	BP	GO:0006120	0.0330008	Inf	0.0330008	1	1	mitochondrial electron transport, NADH to ubiquinone
set1∆	Antisense	Upregulated	BP	GO:0010619	0.0330008	Inf	0.0330008	1	1	adenylate cyclase-activating glucose-activated G-protein coupled receptor signaling pathway
set1∆	Antisense	Upregulated	BP	GO:0032868	0.0330008	Inf	0.0330008	1	1	response to insulin stimulus
set1∆	Antisense	Upregulated	BP	GO:0032869	0.0330008	Inf	0.0330008	1	1	cellular response to insulin stimulus
set1∆	Antisense	Upregulated	BP	GO:0032870	0.0330008	Inf	0.0330008	1	1	cellular response to hormone stimulus
set1∆	Antisense	Upregulated	BP	GO:0046626	0.0330008	Inf	0.0330008	1	1	regulation of insulin receptor signaling pathway
set1∆	Antisense	Upregulated	BP	GO:0032516	0.0330008	Inf	0.0330008	1	1	positive regulation of phosphoprotein phosphatase activity
set1∆	Antisense	Upregulated	BP	GO:0045991	0.0330008	Inf	0.0330008	1	1	carbon catabolite activation of transcription
set1∆	Antisense	Upregulated	BP	GO:0007167	0.0330008	Inf	0.0330008	1	1	enzyme linked receptor protein signaling pathway
set1∆	Antisense	Upregulated	BP	GO:0007169	0.0330008	Inf	0.0330008	1	1	transmembrane receptor protein tyrosine kinase signaling pathway
set1∆	Antisense	Upregulated	BP	GO:0017121	0.0330008	Inf	0.0330008	1	1	phospholipid scrambling
set1∆	Antisense	Upregulated	BP	GO:0000091	0.0330008	Inf	0.0330008	1	1	mitotic anaphase A
set1∆	Antisense	Upregulated	BP	GO:0006814	0.0330008	Inf	0.0330008	1	1	sodium ion transport
set1∆	Antisense	Upregulated	BP	GO:0010922	0.0330008	Inf	0.0330008	1	1	positive regulation of phosphatase activity
set1∆	Antisense	Upregulated	BP	GO:0009756	0.0330008	Inf	0.0330008	1	1	carbohydrate mediated signaling
set1∆	Antisense	Upregulated	BP	GO:0009757	0.0330008	Inf	0.0330008	1	1	hexose mediated signaling
set1∆	Antisense	Upregulated	BP	GO:0009725	0.0330008	Inf	0.0330008	1	1	response to hormone stimulus
set1∆	Antisense	Upregulated	BP	GO:0009719	0.0330008	Inf	0.0330008	1	1	response to endogenous stimulus
set1∆	Sense	Downregulated	MF	GO:0018024	0.0330331	35.5442	0.0334983	1	8	histone-lysine N-methyltransferase activity
set1∆	Sense	Downregulated	MF	GO:0042054	0.0330331	35.5442	0.0334983	1	8	histone methyltransferase activity
ash2∆	Sense	Upregulated	CC	GO:0044444	0.0330784	6.00052	12.3751	16	3829	cytoplasmic part
swd1∆	Sense	Downregulated	BP	GO:0034968	0.033141	38.0368	0.0335764	1	35	histone lysine methylation
set1∆	Sense	Downregulated	BP	GO:0042726	0.0332956	35.2585	0.0337682	1	8	flavin-containing compound metabolic process
set1∆	Sense	Downregulated	BP	GO:0042727	0.0332956	35.2585	0.0337682	1	8	flavin-containing compound biosynthetic process
set1∆	Sense	Downregulated	BP	GO:0033212	0.0332956	35.2585	0.0337682	1	8	iron assimilation
set1∆	Antisense	Upregulated	CC	GO:0045271	0.0334601	Inf	0.0334601	1	1	respiratory chain complex I
set1∆	Antisense	Upregulated	CC	GO:0000941	0.0334601	Inf	0.0334601	1	1	condensed nuclear chromosome inner kinetochore
set1∆	Antisense	Upregulated	CC	GO:0005747	0.0334601	Inf	0.0334601	1	1	mitochondrial respiratory chain complex I
set1∆	Antisense	Upregulated	CC	GO:0009330	0.0334601	Inf	0.0334601	1	1	DNA topoisomerase complex (ATP-hydrolyzing)
set1∆	Antisense	Upregulated	CC	GO:0030964	0.0334601	Inf	0.0334601	1	1	NADH dehydrogenase complex
set1∆	Antisense	Upregulated	CC	GO:0000110	0.0334601	Inf	0.0334601	1	1	nucleotide-excision repair factor 1 complex
set1∆	Antisense	Upregulated	CC	GO:0030478	0.0334601	Inf	0.0334601	1	1	actin cap
set1∆	Antisense	Upregulated	BP	GO:0031445	0.0334642	8.45882	0.297007	2	9	regulation of heterochromatin assembly
set1∆	Antisense	Upregulated	BP	GO:0070588	0.0334642	8.45882	0.297007	2	9	calcium ion transmembrane transport
set1∆	Antisense	Upregulated	BP	GO:0051304	0.0334642	8.45882	0.297007	2	9	chromosome separation
set1∆	Antisense	Upregulated	BP	GO:0031935	0.0334642	8.45882	0.297007	2	9	regulation of chromatin silencing
set1∆	Antisense	Upregulated	MF	GO:0005337	0.0334983	Inf	0.0334983	1	1	nucleoside transmembrane transporter activity
set1∆	Antisense	Upregulated	MF	GO:0005452	0.0334983	Inf	0.0334983	1	1	inorganic anion exchanger activity
set1∆	Antisense	Upregulated	MF	GO:0008137	0.0334983	Inf	0.0334983	1	1	NADH dehydrogenase (ubiquinone) activity
set1∆	Antisense	Upregulated	MF	GO:0015301	0.0334983	Inf	0.0334983	1	1	anion:anion antiporter activity
set1∆	Antisense	Upregulated	MF	GO:0050185	0.0334983	Inf	0.0334983	1	1	phosphatidylinositol deacylase activity
set1∆	Antisense	Upregulated	MF	GO:0004065	0.0334983	Inf	0.0334983	1	1	arylsulfatase activity
set1∆	Antisense	Upregulated	MF	GO:0050136	0.0334983	Inf	0.0334983	1	1	NADH dehydrogenase (quinone) activity
set1∆	Antisense	Upregulated	MF	GO:0004034	0.0334983	Inf	0.0334983	1	1	aldose 1-epimerase activity
set1∆	Antisense	Upregulated	MF	GO:0004592	0.0334983	Inf	0.0334983	1	1	pantoate-beta-alanine ligase activity
set1∆	Antisense	Upregulated	MF	GO:0017128	0.0334983	Inf	0.0334983	1	1	phospholipid scramblase activity
set1∆	Antisense	Upregulated	MF	GO:0031418	0.0334983	Inf	0.0334983	1	1	L-ascorbic acid binding
set1∆	Antisense	Upregulated	MF	GO:0015106	0.0334983	Inf	0.0334983	1	1	bicarbonate transmembrane transporter activity
set1∆	Antisense	Upregulated	MF	GO:0004676	0.0334983	Inf	0.0334983	1	1	3-phosphoinositide-dependent protein kinase activity
set1∆	Antisense	Upregulated	MF	GO:0015108	0.0334983	Inf	0.0334983	1	1	chloride transmembrane transporter activity
set1∆	Antisense	Upregulated	MF	GO:0015211	0.0334983	Inf	0.0334983	1	1	purine nucleoside transmembrane transporter activity
set1∆	Antisense	Upregulated	MF	GO:0005098	0.0334983	Inf	0.0334983	1	1	Ran GTPase activator activity
set1∆	Antisense	Upregulated	MF	GO:0004357	0.0334983	Inf	0.0334983	1	1	glutamate-cysteine ligase activity
set1∆	Antisense	Upregulated	MF	GO:0004307	0.0334983	Inf	0.0334983	1	1	ethanolaminephosphotransferase activity
set1∆	Antisense	Upregulated	MF	GO:0046911	0.0334983	Inf	0.0334983	1	1	metal chelating activity
set1∆	Antisense	Upregulated	MF	GO:0008310	0.0334983	Inf	0.0334983	1	1	single-stranded DNA 3'-5' exodeoxyribonuclease activity
set1∆	Antisense	Upregulated	MF	GO:0003980	0.0334983	Inf	0.0334983	1	1	UDP-glucose:glycoprotein glucosyltransferase activity
set1∆	Antisense	Upregulated	MF	GO:0004142	0.0334983	Inf	0.0334983	1	1	diacylglycerol cholinephosphotransferase activity
set1∆	Antisense	Upregulated	MF	GO:0008484	0.0334983	Inf	0.0334983	1	1	sulfuric ester hydrolase activity
set1∆	Antisense	Upregulated	MF	GO:0046715	0.0334983	Inf	0.0334983	1	1	borate transmembrane transporter activity
shg1∆	Sense	Upregulated	BP	GO:0007049	0.0335106	6.61111	0.790867	3	687	cell cycle
set1∆	Antisense	Upregulated	MF	GO:0043492	0.0335442	3.00095	1.80891	5	54	ATPase activity, coupled to movement of substances
set1∆	Sense	Upregulated	BP	GO:0008277	0.0335835	44.4052	0.0339601	1	3	regulation of G-protein coupled receptor protein signaling pathway
set1∆	Sense	Upregulated	BP	GO:0046135	0.0335835	44.4052	0.0339601	1	3	pyrimidine nucleoside catabolic process
set1∆	Sense	Upregulated	BP	GO:0006314	0.0335835	44.4052	0.0339601	1	3	intron homing
set1∆	Sense	Upregulated	BP	GO:0015718	0.0335835	44.4052	0.0339601	1	3	monocarboxylic acid transport
set1∆	Sense	Upregulated	BP	GO:0060240	0.0335835	44.4052	0.0339601	1	3	negative regulation of signal transduction involved in conjugation with cellular fusion
set1∆	Sense	Upregulated	BP	GO:0010963	0.0335835	44.4052	0.0339601	1	3	regulation of L-arginine import
set1∆	Sense	Upregulated	BP	GO:0000090	0.0335835	44.4052	0.0339601	1	3	mitotic anaphase
set1∆	Sense	Upregulated	BP	GO:0010969	0.0335835	44.4052	0.0339601	1	3	regulation of pheromone-dependent signal transduction involved in conjugation with cellular fusion
swd1∆	Sense	Downregulated	MF	GO:0005215	0.0336726	10.1672	0.309288	2	325	transporter activity
swd1∆	Antisense	Upregulated	CC	GO:0005788	0.0337236	33.987	0.0342205	1	12	endoplasmic reticulum lumen
spp1∆	Sense	Upregulated	BP	GO:0030435	0.033739	7.84154	0.293553	2	102	sporulation resulting in formation of a cellular spore
spp1∆	Sense	Upregulated	BP	GO:0030437	0.033739	7.84154	0.293553	2	102	ascospore formation
spp1∆	Sense	Upregulated	BP	GO:0043934	0.033739	7.84154	0.293553	2	102	sporulation
spp1∆	Sense	Upregulated	BP	GO:0043935	0.033739	7.84154	0.293553	2	102	sexual sporulation resulting in formation of a cellular spore
spp1∆	Sense	Upregulated	BP	GO:0034293	0.033739	7.84154	0.293553	2	102	sexual sporulation
swd1∆	Antisense	Upregulated	BP	GO:0006730	0.033739	7.84154	0.293553	2	102	one-carbon metabolic process
ash2∆	Antisense	Downregulated	CC	GO:0030479	0.0337934	39.4848	0.0342205	1	45	actin cortical patch
swd1∆	Sense	Upregulated	BP	GO:0009064	0.0338578	7.53338	0.291443	2	49	glutamine family amino acid metabolic process
set1∆	Sense	Upregulated	MF	GO:0022891	0.033874	2.66791	2.43814	6	210	substrate-specific transmembrane transporter activity
swd2∆	Antisense	Upregulated	BP	GO:0009892	0.0338843	4.87169	0.730622	3	238	negative regulation of metabolic process
set1∆	Antisense	Upregulated	BP	GO:0031497	0.0339961	2.98802	1.81504	5	55	chromatin assembly
spp1∆	Sense	Upregulated	BP	GO:0022403	0.0340104	3.90232	1.28645	4	447	cell cycle phase
spp1∆	Sense	Upregulated	BP	GO:0034620	0.0340296	33.6753	0.0345357	1	12	cellular response to unfolded protein
spp1∆	Sense	Upregulated	BP	GO:0006986	0.0340296	33.6753	0.0345357	1	12	response to unfolded protein
spp1∆	Sense	Upregulated	BP	GO:0009607	0.0340296	33.6753	0.0345357	1	12	response to biotic stimulus
swd1∆	Antisense	Upregulated	BP	GO:0030473	0.0340296	33.6753	0.0345357	1	12	nuclear migration along microtubule
swd1∆	Antisense	Upregulated	BP	GO:0001672	0.0340296	33.6753	0.0345357	1	12	regulation of chromatin assembly or disassembly
swd1∆	Antisense	Upregulated	BP	GO:0010847	0.0340296	33.6753	0.0345357	1	12	regulation of chromatin assembly
swd1∆	Antisense	Upregulated	BP	GO:0006826	0.0340296	33.6753	0.0345357	1	12	iron ion transport
spp1∆	Antisense	Upregulated	BP	GO:0006644	0.0340431	3.49455	1.2312	4	93	phospholipid metabolic process
set1∆	Antisense	Downregulated	CC	GO:0034708	0.0340918	33.5513	0.0346008	1	14	methyltransferase complex
sdc1∆	Sense	Upregulated	BP	GO:0005975	0.0343834	2.67391	2.45434	6	246	carbohydrate metabolic process
set1∆	Sense	Upregulated	CC	GO:0042597	0.0343954	43.3083	0.0347909	1	3	periplasmic space
set1∆	Sense	Upregulated	CC	GO:0030287	0.0343954	43.3083	0.0347909	1	3	cell wall-bounded periplasmic space
set1∆	Sense	Upregulated	MF	GO:0033436	0.0344343	43.2583	0.0348306	1	3	AUG codon-amino acid adaptor activity
set1∆	Sense	Upregulated	MF	GO:0004040	0.0344343	43.2583	0.0348306	1	3	amidase activity
set1∆	Sense	Upregulated	MF	GO:0008793	0.0344343	43.2583	0.0348306	1	3	aromatic-amino-acid:2-oxoglutarate aminotransferase activity
set1∆	Sense	Upregulated	MF	GO:0008783	0.0344343	43.2583	0.0348306	1	3	agmatinase activity
set1∆	Sense	Upregulated	MF	GO:0015101	0.0344343	43.2583	0.0348306	1	3	organic cation transmembrane transporter activity
set1∆	Sense	Upregulated	MF	GO:0008519	0.0344343	43.2583	0.0348306	1	3	ammonium transmembrane transporter activity
set1∆	Sense	Upregulated	MF	GO:0015204	0.0344343	43.2583	0.0348306	1	3	urea transmembrane transporter activity
set1∆	Sense	Upregulated	MF	GO:0016841	0.0344343	43.2583	0.0348306	1	3	ammonia-lyase activity
set1∆	Sense	Upregulated	MF	GO:0042887	0.0344343	43.2583	0.0348306	1	3	amide transmembrane transporter activity
ash2∆	Antisense	Downregulated	CC	GO:0030864	0.0345345	38.6	0.034981	1	46	cortical actin cytoskeleton
set1∆	Sense	Downregulated	BP	GO:0017038	0.0345483	7.53235	0.295472	2	70	protein import
sdc1∆	Antisense	Upregulated	BP	GO:0006633	0.0347857	33.6494	0.0353031	1	23	fatty acid biosynthetic process
set1∆	Antisense	Upregulated	BP	GO:0051276	0.0348026	1.61764	13.8603	21	420	chromosome organization
set1∆	Antisense	Upregulated	BP	GO:0045814	0.0348273	2.41526	3.10207	7	94	negative regulation of gene expression, epigenetic
set1∆	Antisense	Upregulated	BP	GO:0006342	0.0348273	2.41526	3.10207	7	94	chromatin silencing
ash2∆	Antisense	Downregulated	BP	GO:0007015	0.0348484	38.2444	0.0353031	1	46	actin filament organization
swd3∆	Sense	Upregulated	MF	GO:0016491	0.0348778	9.21852	0.31062	2	272	oxidoreductase activity
spp1∆	Sense	Upregulated	BP	GO:0048468	0.034966	7.68477	0.299309	2	104	cell development
swd1∆	Sense	Downregulated	BP	GO:0009112	0.0350079	35.9097	0.035495	1	37	nucleobase metabolic process
ash2∆	Sense	Upregulated	MF	GO:0016620	0.0350545	32.6688	0.0355919	1	11	oxidoreductase activity, acting on the aldehyde or oxo group of donors, NAD or NADP as acceptor
shg1∆	Sense	Upregulated	BP	GO:0000724	0.035177	34.5067	0.0356869	1	31	double-strand break repair via homologous recombination
swd1∆	Sense	Upregulated	BP	GO:0006067	0.035177	34.5067	0.0356869	1	6	ethanol metabolic process
swd1∆	Sense	Upregulated	BP	GO:0006458	0.035177	34.5067	0.0356869	1	6	'de novo' protein folding
swd1∆	Sense	Upregulated	BP	GO:0006113	0.035177	34.5067	0.0356869	1	6	fermentation
swd1∆	Sense	Upregulated	BP	GO:0034308	0.035177	34.5067	0.0356869	1	6	primary alcohol metabolic process
swd3∆	Antisense	Upregulated	BP	GO:0032989	0.0353719	55.6304	0.0356869	1	93	cellular component morphogenesis
swd3∆	Antisense	Upregulated	BP	GO:0009653	0.0353719	55.6304	0.0356869	1	93	anatomical structure morphogenesis
swd3∆	Antisense	Upregulated	BP	GO:0048856	0.0353719	55.6304	0.0356869	1	93	anatomical structure development
swd1∆	Antisense	Upregulated	BP	GO:0046700	0.0354074	4.8252	0.745395	3	259	heterocycle catabolic process
set1∆	Antisense	Upregulated	CC	GO:0030427	0.0354342	1.96287	5.95589	11	178	site of polarized growth
swd1∆	Antisense	Downregulated	MF	GO:0008289	0.0354655	55.4731	0.0357823	1	94	lipid binding
swd2∆	Antisense	Upregulated	MF	GO:0004518	0.0355242	7.57143	0.301485	2	99	nuclease activity
sdc1∆	Sense	Downregulated	CC	GO:0005576	0.0355701	32.2963	0.0361217	1	19	extracellular region
set1∆	Antisense	Upregulated	BP	GO:0006807	0.035573	1.35063	57.4213	69	1740	nitrogen compound metabolic process
swd2∆	Sense	Downregulated	MF	GO:0022890	0.0358394	54.8723	0.0361629	1	95	inorganic cation transmembrane transporter activity
swd3∆	Sense	Downregulated	MF	GO:0022890	0.0358394	54.8723	0.0361629	1	95	inorganic cation transmembrane transporter activity
shg1∆	Antisense	Upregulated	BP	GO:0065009	0.0359079	4.52057	0.734459	3	132	regulation of molecular function
swd1∆	Sense	Upregulated	MF	GO:0016641	0.0360085	33.6581	0.0365436	1	6	oxidoreductase activity, acting on the CH-NH2 group of donors, oxygen as acceptor
swd1∆	Sense	Upregulated	MF	GO:0051087	0.0360085	33.6581	0.0365436	1	6	chaperone binding
swd1∆	Sense	Upregulated	MF	GO:0048038	0.0360085	33.6581	0.0365436	1	6	quinone binding
sdc1∆	Antisense	Downregulated	MF	GO:0004553	0.036056	36.9007	0.0365436	1	48	hydrolase activity, hydrolyzing O-glycosyl compounds
shg1∆	Sense	Downregulated	BP	GO:0006200	0.0360706	Inf	0.0360706	1	188	ATP catabolic process
swd1∆	Antisense	Downregulated	BP	GO:0051188	0.0361255	54.4255	0.0364543	1	95	cofactor biosynthetic process
swd3∆	Antisense	Upregulated	BP	GO:0051188	0.0361255	54.4255	0.0364543	1	95	cofactor biosynthetic process
swd2∆	Antisense	Upregulated	BP	GO:0042125	0.03626	31.4242	0.0368381	1	12	protein galactosylation
swd2∆	Antisense	Upregulated	BP	GO:0001672	0.03626	31.4242	0.0368381	1	12	regulation of chromatin assembly or disassembly
swd2∆	Antisense	Upregulated	BP	GO:0010847	0.03626	31.4242	0.0368381	1	12	regulation of chromatin assembly
sdc1∆	Antisense	Downregulated	BP	GO:0050793	0.0363426	36.6028	0.0368381	1	48	regulation of developmental process
swd3∆	Sense	Upregulated	BP	GO:0006006	0.0363426	36.6028	0.0368381	1	48	glucose metabolic process
swd3∆	Sense	Upregulated	BP	GO:0046164	0.0363426	36.6028	0.0368381	1	48	alcohol catabolic process
set1∆	Antisense	Upregulated	BP	GO:0030702	0.0363688	2.92885	1.84804	5	56	chromatin silencing at centromere
swd1∆	Sense	Upregulated	BP	GO:0044270	0.0364405	7.22308	0.303338	2	51	cellular nitrogen compound catabolic process
shg1∆	Sense	Downregulated	BP	GO:0042592	0.0364543	Inf	0.0364543	1	190	homeostatic process
swd1∆	Antisense	Upregulated	BP	GO:0009205	0.036466	4.76641	0.754029	3	262	purine ribonucleoside triphosphate metabolic process
ash2∆	Sense	Downregulated	BP	GO:0043414	0.0365023	53.8421	0.0368381	1	96	macromolecule methylation
ash2∆	Sense	Downregulated	BP	GO:0032259	0.0365023	53.8421	0.0368381	1	96	methylation
swd2∆	Sense	Downregulated	BP	GO:0030003	0.0365023	53.8421	0.0368381	1	96	cellular cation homeostasis
swd2∆	Sense	Downregulated	BP	GO:0043414	0.0365023	53.8421	0.0368381	1	96	macromolecule methylation
swd2∆	Sense	Downregulated	BP	GO:0032259	0.0365023	53.8421	0.0368381	1	96	methylation
swd3∆	Sense	Downregulated	BP	GO:0030003	0.0365023	53.8421	0.0368381	1	96	cellular cation homeostasis
swd3∆	Sense	Downregulated	BP	GO:0043414	0.0365023	53.8421	0.0368381	1	96	macromolecule methylation
swd3∆	Sense	Downregulated	BP	GO:0032259	0.0365023	53.8421	0.0368381	1	96	methylation
set1∆	Antisense	Downregulated	MF	GO:0043021	0.0365264	31.1131	0.0371146	1	15	ribonucleoprotein complex binding
spp1∆	Sense	Upregulated	MF	GO:0016278	0.0365264	31.1131	0.0371146	1	13	lysine N-methyltransferase activity
spp1∆	Sense	Upregulated	MF	GO:0016279	0.0365264	31.1131	0.0371146	1	13	protein-lysine N-methyltransferase activity
spp1∆	Antisense	Upregulated	BP	GO:0006633	0.0365408	7.28074	0.30449	2	23	fatty acid biosynthetic process
shg1∆	Antisense	Upregulated	MF	GO:0015923	0.0367344	32.2222	0.0373049	1	7	mannosidase activity
shg1∆	Antisense	Upregulated	MF	GO:0043176	0.0367344	32.2222	0.0373049	1	7	amine binding
shg1∆	Antisense	Upregulated	MF	GO:0019238	0.0367344	32.2222	0.0373049	1	7	cyclohydrolase activity
shg1∆	Antisense	Upregulated	MF	GO:0016597	0.0367344	32.2222	0.0373049	1	7	amino acid binding
spp1∆	Sense	Upregulated	BP	GO:0000726	0.036816	30.8631	0.0374137	1	13	non-recombinational repair
spp1∆	Sense	Upregulated	BP	GO:0044247	0.036816	30.8631	0.0374137	1	13	cellular polysaccharide catabolic process
spp1∆	Sense	Upregulated	BP	GO:0018022	0.036816	30.8631	0.0374137	1	13	peptidyl-lysine methylation
swd1∆	Antisense	Upregulated	BP	GO:0010970	0.036816	30.8631	0.0374137	1	13	microtubule-based transport
swd1∆	Antisense	Upregulated	BP	GO:0055069	0.036816	30.8631	0.0374137	1	13	zinc ion homeostasis
swd1∆	Antisense	Upregulated	BP	GO:0009199	0.0368226	4.74712	0.756907	3	263	ribonucleoside triphosphate metabolic process
ash2∆	Antisense	Upregulated	BP	GO:0010558	0.0368381	Inf	0.0368381	1	192	negative regulation of macromolecule biosynthetic process
set1∆	Sense	Downregulated	MF	GO:0015203	0.0370883	31.0952	0.0376856	1	9	polyamine transmembrane transporter activity
set1∆	Sense	Downregulated	MF	GO:0000297	0.0370883	31.0952	0.0376856	1	9	spermine transmembrane transporter activity
swd3∆	Sense	Upregulated	BP	GO:0006733	0.0370891	35.8333	0.0376055	1	49	oxidoreduction coenzyme metabolic process
swd1∆	Antisense	Upregulated	BP	GO:0009144	0.0371811	4.72797	0.759785	3	264	purine nucleoside triphosphate metabolic process
swd1∆	Antisense	Downregulated	MF	GO:0008168	0.037334	52.5918	0.0376856	1	99	methyltransferase activity
sdc1∆	Sense	Downregulated	BP	GO:0006865	0.0373823	30.8452	0.0379893	1	22	amino acid transport
set1∆	Sense	Downregulated	BP	GO:0006071	0.0373823	30.8452	0.0379893	1	9	glycerol metabolic process
set1∆	Sense	Downregulated	BP	GO:0000296	0.0373823	30.8452	0.0379893	1	9	spermine transport
set1∆	Sense	Downregulated	BP	GO:0045727	0.0373823	30.8452	0.0379893	1	9	positive regulation of translation
set1∆	Sense	Downregulated	BP	GO:0015846	0.0373823	30.8452	0.0379893	1	9	polyamine transport
ash2∆	Antisense	Downregulated	CC	GO:0030863	0.0374946	35.4218	0.0380228	1	50	cortical cytoskeleton
spp1∆	Antisense	Upregulated	BP	GO:0019637	0.0376167	3.3786	1.27091	4	96	organophosphate metabolic process
sdc1∆	Sense	Upregulated	BP	GO:0006090	0.0377598	7.07724	0.309286	2	31	pyruvate metabolic process
set1∆	Antisense	Upregulated	BP	GO:0051726	0.0379186	1.66285	11.5173	18	349	regulation of cell cycle
shg1∆	Antisense	Upregulated	CC	GO:0005937	0.037982	31.1012	0.0385932	1	7	mating projection
shg1∆	Antisense	Upregulated	CC	GO:0031080	0.037982	31.1012	0.0385932	1	7	nuclear pore outer ring
shg1∆	Antisense	Upregulated	CC	GO:0042995	0.037982	31.1012	0.0385932	1	7	cell projection
swd2∆	Sense	Downregulated	BP	GO:0006873	0.0380085	51.6263	0.038373	1	100	cellular ion homeostasis
swd3∆	Sense	Downregulated	BP	GO:0006873	0.0380085	51.6263	0.038373	1	100	cellular ion homeostasis
swd1∆	Antisense	Downregulated	MF	GO:0016741	0.0380809	51.52	0.0384469	1	101	transferase activity, transferring one-carbon groups
swd2∆	Sense	Downregulated	MF	GO:0008324	0.0380809	51.52	0.0384469	1	101	cation transmembrane transporter activity
swd3∆	Sense	Downregulated	MF	GO:0008324	0.0380809	51.52	0.0384469	1	101	cation transmembrane transporter activity
swd1∆	Antisense	Upregulated	BP	GO:0044248	0.0380925	3.30454	1.98005	5	688	cellular catabolic process
shg1∆	Antisense	Upregulated	BP	GO:0000755	0.0383261	30.8155	0.0389486	1	7	cytogamy
shg1∆	Antisense	Upregulated	BP	GO:0043043	0.0383261	30.8155	0.0389486	1	7	peptide biosynthetic process
set1∆	Antisense	Upregulated	BP	GO:0040029	0.0384155	2.36003	3.16807	7	96	regulation of gene expression, epigenetic
swd1∆	Sense	Downregulated	MF	GO:0046873	0.0384281	32.5562	0.0390179	1	41	metal ion transmembrane transporter activity
set1∆	Antisense	Downregulated	BP	GO:0018205	0.0384858	29.4545	0.0391404	1	17	peptidyl-lysine modification
set1∆	Antisense	Upregulated	MF	GO:0003824	0.0385423	1.33203	65.2882	77	1949	catalytic activity
swd3∆	Sense	Upregulated	BP	GO:0044270	0.0385806	34.3867	0.0391404	1	51	cellular nitrogen compound catabolic process
ash2∆	Antisense	Upregulated	BP	GO:0009890	0.0387567	Inf	0.0387567	1	202	negative regulation of biosynthetic process
ash2∆	Antisense	Upregulated	BP	GO:0031327	0.0387567	Inf	0.0387567	1	202	negative regulation of cellular biosynthetic process
ash2∆	Sense	Downregulated	BP	GO:0006730	0.0387611	50.5842	0.0391404	1	102	one-carbon metabolic process
swd2∆	Sense	Downregulated	BP	GO:0006730	0.0387611	50.5842	0.0391404	1	102	one-carbon metabolic process
swd2∆	Sense	Downregulated	BP	GO:0055082	0.0387611	50.5842	0.0391404	1	102	cellular chemical homeostasis
swd3∆	Sense	Downregulated	BP	GO:0006730	0.0387611	50.5842	0.0391404	1	102	one-carbon metabolic process
swd3∆	Sense	Downregulated	BP	GO:0055082	0.0387611	50.5842	0.0391404	1	102	cellular chemical homeostasis
sdc1∆	Sense	Downregulated	CC	GO:0044425	0.0387741	3.80329	2.08745	5	1098	membrane part
set1∆	Antisense	Upregulated	BP	GO:0006333	0.0388413	2.87195	1.88104	5	57	chromatin assembly or disassembly
shg1∆	Sense	Downregulated	BP	GO:0046034	0.0389486	Inf	0.0389486	1	203	ATP metabolic process
swd1∆	Antisense	Upregulated	BP	GO:0009141	0.0390012	4.6344	0.774175	3	269	nucleoside triphosphate metabolic process
sdc1∆	Sense	Upregulated	MF	GO:0004024	0.039016	33.9804	0.0395889	1	4	alcohol dehydrogenase activity, zinc-dependent
sdc1∆	Sense	Upregulated	MF	GO:0004602	0.039016	33.9804	0.0395889	1	4	glutathione peroxidase activity
sdc1∆	Sense	Upregulated	MF	GO:0016774	0.039016	33.9804	0.0395889	1	4	phosphotransferase activity, carboxyl group as acceptor
sdc1∆	Sense	Upregulated	MF	GO:0016832	0.039016	33.9804	0.0395889	1	4	aldehyde-lyase activity
sdc1∆	Sense	Upregulated	MF	GO:0030414	0.039016	33.9804	0.0395889	1	4	peptidase inhibitor activity
sdc1∆	Sense	Downregulated	BP	GO:0051445	0.0390516	29.4375	0.039716	1	23	regulation of meiotic cell cycle
swd1∆	Antisense	Downregulated	BP	GO:0030036	0.0391374	50.0784	0.0395242	1	103	actin cytoskeleton organization
swd3∆	Antisense	Upregulated	BP	GO:0030036	0.0391374	50.0784	0.0395242	1	103	actin cytoskeleton organization
spp1∆	Antisense	Upregulated	BP	GO:0009650	0.0392	37.8015	0.039716	1	3	UV protection
spp1∆	Antisense	Upregulated	BP	GO:0015780	0.0392	37.8015	0.039716	1	3	nucleotide-sugar transport
spp1∆	Antisense	Upregulated	BP	GO:0006750	0.0392	37.8015	0.039716	1	3	glutathione biosynthetic process
spp1∆	Antisense	Upregulated	BP	GO:0019184	0.0392	37.8015	0.039716	1	3	nonribosomal peptide biosynthetic process
spp1∆	Antisense	Upregulated	BP	GO:0019290	0.0392	37.8015	0.039716	1	3	siderophore biosynthetic process
spp1∆	Antisense	Upregulated	BP	GO:0009237	0.0392	37.8015	0.039716	1	3	siderophore metabolic process
swd2∆	Antisense	Upregulated	BP	GO:0009086	0.0392254	28.8	0.0399079	1	13	methionine biosynthetic process
swd1∆	Antisense	Upregulated	CC	GO:0005656	0.0392399	28.7473	0.039924	1	14	nuclear pre-replicative complex
sdc1∆	Antisense	Downregulated	BP	GO:0034637	0.0393258	33.7059	0.0399079	1	52	cellular carbohydrate biosynthetic process
sdc1∆	Sense	Upregulated	BP	GO:0042743	0.0393258	33.7059	0.0399079	1	4	hydrogen peroxide metabolic process
sdc1∆	Sense	Upregulated	BP	GO:0042744	0.0393258	33.7059	0.0399079	1	4	hydrogen peroxide catabolic process
sdc1∆	Sense	Upregulated	BP	GO:0010466	0.0393258	33.7059	0.0399079	1	4	negative regulation of peptidase activity
sdc1∆	Sense	Upregulated	BP	GO:0052547	0.0393258	33.7059	0.0399079	1	4	regulation of peptidase activity
sdc1∆	Sense	Upregulated	BP	GO:0001676	0.0393258	33.7059	0.0399079	1	4	long-chain fatty acid metabolic process
set1∆	Sense	Upregulated	BP	GO:0046942	0.0394463	6.91903	0.316961	2	28	carboxylic acid transport
spp1∆	Antisense	Upregulated	MF	GO:0016631	0.0394468	37.5507	0.0399695	1	3	enoyl-[acyl-carrier-protein] reductase activity
spp1∆	Antisense	Upregulated	MF	GO:0070403	0.0394468	37.5507	0.0399695	1	3	NAD+ binding
spp1∆	Antisense	Upregulated	MF	GO:0031177	0.0394468	37.5507	0.0399695	1	3	phosphopantetheine binding
swd2∆	Sense	Downregulated	BP	GO:0055080	0.0395135	49.5825	0.0399079	1	104	cation homeostasis
swd3∆	Sense	Downregulated	BP	GO:0055080	0.0395135	49.5825	0.0399079	1	104	cation homeostasis
spp1∆	Sense	Upregulated	BP	GO:0000731	0.039595	28.4835	0.0402916	1	14	DNA synthesis involved in DNA repair
swd1∆	Antisense	Upregulated	BP	GO:0007097	0.039595	28.4835	0.0402916	1	14	nuclear migration
swd1∆	Antisense	Upregulated	BP	GO:0070828	0.039595	28.4835	0.0402916	1	14	heterochromatin organization
swd1∆	Antisense	Upregulated	BP	GO:0031507	0.039595	28.4835	0.0402916	1	14	heterochromatin assembly
ash2∆	Sense	Upregulated	BP	GO:0034641	0.0397947	4.5228	0.776285	3	238	cellular nitrogen compound metabolic process
ash2∆	Sense	Downregulated	MF	GO:0019787	0.0399469	49.019	0.0403502	1	106	small conjugating protein ligase activity
spp1∆	Antisense	Upregulated	CC	GO:0000138	0.0399577	37.05	0.0404943	1	3	Golgi trans cisterna
swd1∆	Antisense	Upregulated	BP	GO:0000746	0.0400477	7.11469	0.322333	2	112	conjugation
swd1∆	Antisense	Upregulated	BP	GO:0000747	0.0400477	7.11469	0.322333	2	112	conjugation with cellular fusion
spp1∆	Antisense	Upregulated	BP	GO:0050789	0.0401401	1.6634	14.4566	21	1092	regulation of biological process
swd1∆	Antisense	Downregulated	BP	GO:0030029	0.0406415	48.1509	0.0410591	1	107	actin filament-based process
swd3∆	Antisense	Upregulated	BP	GO:0030029	0.0406415	48.1509	0.0410591	1	107	actin filament-based process
swd1∆	Antisense	Upregulated	BP	GO:0051704	0.040702	7.0492	0.325211	2	113	multi-organism process
swd2∆	Sense	Upregulated	BP	GO:0031047	0.0407183	28.1522	0.0414428	1	24	gene silencing by RNA
shg1∆	Sense	Upregulated	BP	GO:0000725	0.040753	29.5486	0.0414428	1	36	recombinational repair
shg1∆	Sense	Upregulated	BP	GO:0000956	0.040753	29.5486	0.0414428	1	36	nuclear-transcribed mRNA catabolic process
spp1∆	Antisense	Upregulated	BP	GO:0008654	0.0408458	4.20496	0.767843	3	58	phospholipid biosynthetic process
swd1∆	Sense	Upregulated	BP	GO:0008655	0.0409222	28.75	0.0416347	1	7	pyrimidine-containing compound salvage
swd1∆	Sense	Upregulated	BP	GO:0006116	0.0409222	28.75	0.0416347	1	7	NADH oxidation
swd1∆	Sense	Upregulated	BP	GO:0006771	0.0409222	28.75	0.0416347	1	7	riboflavin metabolic process
swd1∆	Sense	Upregulated	BP	GO:0009231	0.0409222	28.75	0.0416347	1	7	riboflavin biosynthetic process
set1∆	Antisense	Upregulated	BP	GO:0060341	0.0409374	7.4	0.330008	2	10	regulation of cellular localization
set1∆	Antisense	Upregulated	BP	GO:0016233	0.0409374	7.4	0.330008	2	10	telomere capping
set1∆	Antisense	Upregulated	BP	GO:0006816	0.0409374	7.4	0.330008	2	10	calcium ion transport
set1∆	Antisense	Upregulated	MF	GO:0008047	0.041024	2.82614	1.9094	5	57	enzyme activator activity
set1∆	Sense	Downregulated	MF	GO:0005381	0.0411272	27.6349	0.0418729	1	10	iron ion transmembrane transporter activity
set1∆	Antisense	Upregulated	BP	GO:0043933	0.0411286	1.72843	9.20721	15	279	macromolecular complex subunit organization
set1∆	Antisense	Downregulated	CC	GO:0000152	0.0412562	27.2448	0.0420152	1	17	nuclear ubiquitin ligase complex
set1∆	Sense	Upregulated	MF	GO:0008080	0.0413106	6.73664	0.325086	2	28	N-acetyltransferase activity
swd2∆	Sense	Downregulated	BP	GO:0050801	0.0413931	47.2407	0.0418266	1	109	ion homeostasis
swd3∆	Sense	Downregulated	BP	GO:0050801	0.0413931	47.2407	0.0418266	1	109	ion homeostasis
set1∆	Sense	Downregulated	BP	GO:0019400	0.0414526	27.4127	0.0422103	1	10	alditol metabolic process
ash2∆	Sense	Upregulated	BP	GO:0042493	0.0416292	26.9948	0.0424021	1	13	response to drug
swd1∆	Sense	Downregulated	BP	GO:0006753	0.0418041	8.97593	0.347276	2	362	nucleoside phosphate metabolic process
swd1∆	Sense	Downregulated	BP	GO:0009117	0.0418041	8.97593	0.347276	2	362	nucleotide metabolic process
swd2∆	Antisense	Upregulated	MF	GO:0003714	0.0418512	26.7949	0.0426342	1	14	transcription corepressor activity
shg1∆	Antisense	Upregulated	MF	GO:0005089	0.0418748	27.6138	0.0426342	1	8	Rho guanyl-nucleotide exchange factor activity
swd1∆	Sense	Upregulated	MF	GO:0019238	0.0418865	28.043	0.0426342	1	7	cyclohydrolase activity
set1∆	Antisense	Upregulated	CC	GO:0000782	0.0419864	7.2931	0.334601	2	10	telomere cap complex
set1∆	Antisense	Upregulated	CC	GO:0000783	0.0419864	7.2931	0.334601	2	10	nuclear telomere cap complex
swd1∆	Antisense	Upregulated	CC	GO:0005874	0.041987	26.6888	0.0427757	1	15	microtubule
ash2∆	Antisense	Upregulated	BP	GO:0016071	0.0420184	Inf	0.0420184	1	219	mRNA metabolic process
set1∆	Sense	Upregulated	BP	GO:0015849	0.0420657	6.66147	0.328281	2	29	organic acid transport
set1∆	Antisense	Upregulated	MF	GO:0035251	0.0420739	7.28448	0.334983	2	10	UDP-glucosyltransferase activity
swd2∆	Sense	Downregulated	BP	GO:0048878	0.0421445	46.3636	0.042594	1	111	chemical homeostasis
swd3∆	Sense	Downregulated	BP	GO:0048878	0.0421445	46.3636	0.042594	1	111	chemical homeostasis
swd2∆	Antisense	Upregulated	BP	GO:0070828	0.0421822	26.5795	0.0429777	1	14	heterochromatin organization
swd2∆	Antisense	Upregulated	BP	GO:0031507	0.0421822	26.5795	0.0429777	1	14	heterochromatin assembly
swd3∆	Sense	Upregulated	BP	GO:0043603	0.042302	31.2303	0.0429777	1	56	cellular amide metabolic process
spp1∆	Sense	Upregulated	BP	GO:0000272	0.0423665	26.4439	0.0431696	1	15	polysaccharide catabolic process
swd1∆	Antisense	Upregulated	BP	GO:0051570	0.0423665	26.4439	0.0431696	1	15	regulation of histone H3-K9 methylation
swd1∆	Antisense	Upregulated	BP	GO:0030705	0.0423665	26.4439	0.0431696	1	15	cytoskeleton-dependent intracellular transport
swd1∆	Antisense	Upregulated	BP	GO:0031048	0.0423665	26.4439	0.0431696	1	15	chromatin silencing by small RNA
sdc1∆	Sense	Downregulated	BP	GO:0007530	0.0423825	26.974	0.0431696	1	25	sex determination
sdc1∆	Sense	Downregulated	BP	GO:0007531	0.0423825	26.974	0.0431696	1	25	mating type determination
sdc1∆	Sense	Downregulated	BP	GO:0003006	0.0423825	26.974	0.0431696	1	25	developmental process involved in reproduction
sdc1∆	Sense	Downregulated	BP	GO:0006536	0.0423825	26.974	0.0431696	1	25	glutamate metabolic process
ash2∆	Antisense	Upregulated	BP	GO:0010605	0.0424021	Inf	0.0424021	1	221	negative regulation of macromolecule metabolic process
set1∆	Sense	Upregulated	BP	GO:0019752	0.0424827	2.33397	3.26017	7	288	carboxylic acid metabolic process
set1∆	Sense	Upregulated	BP	GO:0043436	0.0424827	2.33397	3.26017	7	288	oxoacid metabolic process
set1∆	Sense	Upregulated	BP	GO:0006082	0.0424827	2.33397	3.26017	7	288	organic acid metabolic process
swd1∆	Antisense	Upregulated	BP	GO:0009150	0.0427806	4.45743	0.802955	3	279	purine ribonucleotide metabolic process
set1∆	Antisense	Downregulated	BP	GO:0031145	0.0429231	26.1717	0.0437452	1	19	anaphase-promoting complex-dependent proteasomal ubiquitin-dependent protein catabolic process
ash2∆	Sense	Downregulated	MF	GO:0016881	0.0429288	45.4779	0.0433955	1	114	acid-amino acid ligase activity
swd3∆	Antisense	Upregulated	MF	GO:0016881	0.0429288	45.4779	0.0433955	1	114	acid-amino acid ligase activity
set1∆	Sense	Downregulated	BP	GO:0006200	0.0429571	4.27169	0.793553	3	188	ATP catabolic process
sdc1∆	Sense	Downregulated	MF	GO:0015291	0.0429599	26.3737	0.0437762	1	23	secondary active transmembrane transporter activity
set1∆	Sense	Downregulated	BP	GO:0033365	0.0430847	6.64026	0.333461	2	79	protein localization to organelle
ash2∆	Sense	Upregulated	BP	GO:0005975	0.0432576	4.36684	0.802379	3	246	carbohydrate metabolic process
spp1∆	Sense	Upregulated	BP	GO:0006913	0.0433605	6.79866	0.336723	2	117	nucleocytoplasmic transport
spp1∆	Sense	Upregulated	BP	GO:0051169	0.0433605	6.79866	0.336723	2	117	nuclear transport
swd1∆	Antisense	Upregulated	BP	GO:0032268	0.0433605	6.79866	0.336723	2	117	regulation of cellular protein metabolic process
swd1∆	Sense	Downregulated	BP	GO:0016571	0.0433732	28.6778	0.0441289	1	46	histone methylation
set1∆	Antisense	Upregulated	MF	GO:0005215	0.0434546	1.65584	10.8869	17	325	transporter activity
shg1∆	Sense	Downregulated	MF	GO:0016887	0.0435858	Inf	0.0435858	1	229	ATPase activity
swd1∆	Antisense	Downregulated	CC	GO:0044448	0.0436242	44.7217	0.0441065	1	116	cell cortex part
swd3∆	Antisense	Upregulated	CC	GO:0044448	0.0436242	44.7217	0.0441065	1	116	cell cortex part
set1∆	Antisense	Downregulated	MF	GO:0003887	0.0436823	25.6078	0.0445375	1	18	DNA-directed DNA polymerase activity
set1∆	Antisense	Downregulated	MF	GO:0003682	0.0436823	25.6078	0.0445375	1	18	chromatin binding
swd1∆	Sense	Upregulated	MF	GO:0051082	0.043683	6.50189	0.334983	2	55	unfolded protein binding
shg1∆	Antisense	Upregulated	BP	GO:0034067	0.0436842	26.4082	0.0445127	1	8	protein localization to Golgi apparatus
shg1∆	Antisense	Upregulated	BP	GO:0033212	0.0436842	26.4082	0.0445127	1	8	iron assimilation
shg1∆	Antisense	Upregulated	BP	GO:0008361	0.0436842	26.4082	0.0445127	1	8	regulation of cell size
shg1∆	Antisense	Upregulated	BP	GO:0045053	0.0436842	26.4082	0.0445127	1	8	protein retention in Golgi apparatus
shg1∆	Sense	Upregulated	MF	GO:0042802	0.0437396	27.4211	0.0445375	1	39	identical protein binding
ash2∆	Antisense	Upregulated	BP	GO:0031324	0.0439371	Inf	0.0439371	1	229	negative regulation of cellular metabolic process
shg1∆	Antisense	Upregulated	CC	GO:0005618	0.043955	6.49341	0.336312	2	61	cell wall
shg1∆	Antisense	Upregulated	CC	GO:0030312	0.043955	6.49341	0.336312	2	61	external encapsulating structure
spp1∆	Antisense	Upregulated	CC	GO:0044440	0.0441333	6.5104	0.337452	2	25	endosomal part
set1∆	Antisense	Upregulated	BP	GO:0016458	0.0442402	2.28169	3.26708	7	99	gene silencing
swd1∆	Antisense	Downregulated	BP	GO:0006732	0.0443967	43.9138	0.0448964	1	117	coenzyme metabolic process
swd3∆	Antisense	Upregulated	BP	GO:0006732	0.0443967	43.9138	0.0448964	1	117	coenzyme metabolic process
ash2∆	Sense	Upregulated	MF	GO:0010181	0.0444122	25.1154	0.0452988	1	14	FMN binding
set1∆	Sense	Upregulated	BP	GO:0046497	0.0445296	29.5977	0.0452801	1	4	nicotinate nucleotide metabolic process
set1∆	Sense	Upregulated	BP	GO:0033499	0.0445296	29.5977	0.0452801	1	4	galactose catabolic process via UDP-galactose
set1∆	Sense	Upregulated	BP	GO:0034356	0.0445296	29.5977	0.0452801	1	4	NAD biosynthesis via nicotinamide riboside salvage pathway
set1∆	Sense	Upregulated	BP	GO:0031647	0.0445296	29.5977	0.0452801	1	4	regulation of protein stability
set1∆	Sense	Upregulated	BP	GO:0019365	0.0445296	29.5977	0.0452801	1	4	pyridine nucleotide salvage
set1∆	Sense	Upregulated	BP	GO:0019358	0.0445296	29.5977	0.0452801	1	4	nicotinate nucleotide salvage
set1∆	Sense	Upregulated	BP	GO:0060238	0.0445296	29.5977	0.0452801	1	4	regulation of signal transduction involved in conjugation with cellular fusion
set1∆	Sense	Upregulated	BP	GO:0010958	0.0445296	29.5977	0.0452801	1	4	regulation of amino acid import
set1∆	Sense	Upregulated	BP	GO:0006564	0.0445296	29.5977	0.0452801	1	4	L-serine biosynthetic process
set1∆	Sense	Upregulated	BP	GO:0048585	0.0445296	29.5977	0.0452801	1	4	negative regulation of response to stimulus
shg1∆	Antisense	Upregulated	BP	GO:0043087	0.0446864	6.43315	0.339409	2	61	regulation of GTPase activity
swd1∆	Antisense	Upregulated	MF	GO:0031267	0.0447769	24.8762	0.0456795	1	16	small GTPase binding
swd1∆	Antisense	Upregulated	MF	GO:0017016	0.0447769	24.8762	0.0456795	1	16	Ras GTPase binding
swd2∆	Sense	Downregulated	MF	GO:0015075	0.04479	43.5085	0.0452988	1	119	ion transmembrane transporter activity
swd3∆	Sense	Downregulated	MF	GO:0015075	0.04479	43.5085	0.0452988	1	119	ion transmembrane transporter activity
shg1∆	Sense	Upregulated	MF	GO:0030170	0.0448398	26.7128	0.0456795	1	40	pyridoxal phosphate binding
shg1∆	Sense	Upregulated	MF	GO:0070279	0.0448398	26.7128	0.0456795	1	40	vitamin B6 binding
spp1∆	Antisense	Upregulated	MF	GO:0030554	0.0449056	1.82456	7.84735	13	589	adenyl nucleotide binding
sdc1∆	Antisense	Downregulated	MF	GO:0016798	0.0449155	29.3277	0.0456795	1	60	hydrolase activity, acting on glycosyl bonds
swd2∆	Antisense	Upregulated	BP	GO:0051570	0.0451305	24.6762	0.0460476	1	15	regulation of histone H3-K9 methylation
swd2∆	Antisense	Upregulated	BP	GO:0031048	0.0451305	24.6762	0.0460476	1	15	chromatin silencing by small RNA
set1∆	Antisense	Downregulated	BP	GO:0007533	0.0451347	24.7895	0.0460476	1	20	mating type switching
set1∆	Antisense	Downregulated	BP	GO:0010638	0.0451347	24.7895	0.0460476	1	20	positive regulation of organelle organization
swd1∆	Antisense	Upregulated	BP	GO:0009259	0.0451367	4.35727	0.820223	3	285	ribonucleotide metabolic process
swd2∆	Sense	Downregulated	BP	GO:0019725	0.0451468	43.1525	0.0456639	1	119	cellular homeostasis
swd3∆	Sense	Downregulated	BP	GO:0019725	0.0451468	43.1525	0.0456639	1	119	cellular homeostasis
sdc1∆	Antisense	Upregulated	BP	GO:0006109	0.0451602	25.4926	0.0460476	1	30	regulation of carbohydrate metabolic process
spp1∆	Antisense	Upregulated	MF	GO:0001883	0.0454291	1.821	7.86068	13	590	purine nucleoside binding
set1∆	Sense	Downregulated	BP	GO:0043555	0.0455064	24.6667	0.0464313	1	11	regulation of translation in response to stress
set1∆	Sense	Upregulated	CC	GO:0000307	0.0455999	28.8667	0.0463878	1	4	cyclin-dependent protein kinase holoenzyme complex
set1∆	Sense	Upregulated	MF	GO:0015663	0.0456511	28.8333	0.0464408	1	4	nicotinamide mononucleotide transmembrane transporter activity
set1∆	Sense	Upregulated	MF	GO:0008784	0.0456511	28.8333	0.0464408	1	4	alanine racemase activity
ash2∆	Antisense	Upregulated	BP	GO:0009892	0.0456639	Inf	0.0456639	1	238	negative regulation of metabolic process
spp1∆	Antisense	Upregulated	BP	GO:0006476	0.045768	6.36692	0.344206	2	26	protein deacetylation
spp1∆	Antisense	Upregulated	BP	GO:0016575	0.045768	6.36692	0.344206	2	26	histone deacetylation
swd1∆	Sense	Downregulated	MF	GO:0042626	0.0457865	27.0885	0.0466311	1	49	ATPase activity, coupled to transmembrane movement of substances
swd1∆	Sense	Downregulated	MF	GO:0016820	0.0457865	27.0885	0.0466311	1	49	hydrolase activity, acting on acid anhydrides, catalyzing transmembrane movement of substances
set1∆	Antisense	Downregulated	CC	GO:0030136	0.0460052	24.2083	0.0469582	1	19	clathrin-coated vesicle
swd3∆	Sense	Upregulated	BP	GO:0019318	0.0460126	28.6	0.046815	1	61	hexose metabolic process
ash2∆	Antisense	Downregulated	CC	GO:0005768	0.0463342	28.388	0.0471483	1	62	endosome
sdc1∆	Antisense	Downregulated	CC	GO:0005768	0.0463342	28.388	0.0471483	1	62	endosome
shg1∆	Antisense	Upregulated	MF	GO:0005083	0.046348	6.30403	0.346403	2	65	small GTPase regulator activity
sdc1∆	Sense	Upregulated	MF	GO:0016765	0.0464437	6.26545	0.346403	2	35	transferase activity, transferring alkyl or aryl (other than methyl) groups
set1∆	Antisense	Upregulated	MF	GO:0003700	0.0465296	2.72038	1.9764	5	59	sequence-specific DNA binding transcription factor activity
swd1∆	Sense	Upregulated	BP	GO:0042726	0.0466343	24.6381	0.0475825	1	8	flavin-containing compound metabolic process
swd1∆	Sense	Upregulated	BP	GO:0042727	0.0466343	24.6381	0.0475825	1	8	flavin-containing compound biosynthetic process
swd1∆	Sense	Upregulated	BP	GO:0006734	0.0466343	24.6381	0.0475825	1	8	NADH metabolic process
swd1∆	Sense	Upregulated	BP	GO:0006541	0.0466343	24.6381	0.0475825	1	8	glutamine metabolic process
ash2∆	Antisense	Downregulated	BP	GO:0032507	0.0467534	28.1257	0.0475825	1	62	maintenance of protein location in cell
sdc1∆	Antisense	Downregulated	BP	GO:0032507	0.0467534	28.1257	0.0475825	1	62	maintenance of protein location in cell
set1∆	Antisense	Upregulated	BP	GO:0045132	0.0468637	2.71366	1.98005	5	60	meiotic chromosome segregation
shg1∆	Antisense	Upregulated	MF	GO:0032452	0.0469887	24.1574	0.0479635	1	9	histone demethylase activity
shg1∆	Antisense	Upregulated	MF	GO:0005100	0.0469887	24.1574	0.0479635	1	9	Rho GTPase activator activity
shg1∆	Antisense	Upregulated	MF	GO:0031406	0.0469887	24.1574	0.0479635	1	9	carboxylic acid binding
shg1∆	Sense	Downregulated	BP	GO:0009154	0.0470069	Inf	0.0470069	1	245	purine ribonucleotide catabolic process
shg1∆	Sense	Downregulated	BP	GO:0009146	0.0470069	Inf	0.0470069	1	245	purine nucleoside triphosphate catabolic process
shg1∆	Sense	Downregulated	BP	GO:0009261	0.0470069	Inf	0.0470069	1	245	ribonucleotide catabolic process
shg1∆	Sense	Downregulated	BP	GO:0009203	0.0470069	Inf	0.0470069	1	245	ribonucleoside triphosphate catabolic process
shg1∆	Sense	Downregulated	BP	GO:0009207	0.0470069	Inf	0.0470069	1	245	purine ribonucleoside triphosphate catabolic process
sdc1∆	Sense	Upregulated	BP	GO:0006631	0.0471169	6.21455	0.349194	2	35	fatty acid metabolic process
shg1∆	Sense	Downregulated	BP	GO:0006195	0.0471988	Inf	0.0471988	1	246	purine nucleotide catabolic process
swd2∆	Antisense	Upregulated	CC	GO:0044448	0.0473063	6.42857	0.352852	2	116	cell cortex part
set1∆	Antisense	Upregulated	MF	GO:0004518	0.0473334	2.24479	3.31633	7	99	nuclease activity
sdc1∆	Sense	Downregulated	BP	GO:0043648	0.0473595	23.963	0.04835	1	28	dicarboxylic acid metabolic process
shg1∆	Sense	Downregulated	BP	GO:0009143	0.0473906	Inf	0.0473906	1	247	nucleoside triphosphate catabolic process
spp1∆	Antisense	Upregulated	CC	GO:0000118	0.0474023	6.23792	0.350951	2	26	histone deacetylase complex
swd1∆	Antisense	Upregulated	BP	GO:0051246	0.0474696	6.45391	0.353991	2	123	regulation of protein metabolic process
ash2∆	Antisense	Downregulated	BP	GO:0045185	0.0474938	27.6667	0.04835	1	63	maintenance of protein location
sdc1∆	Antisense	Downregulated	BP	GO:0045185	0.0474938	27.6667	0.04835	1	63	maintenance of protein location
swd1∆	Antisense	Upregulated	MF	GO:0003774	0.0475123	23.317	0.0485344	1	17	motor activity
swd1∆	Antisense	Upregulated	MF	GO:0016903	0.0475123	23.317	0.0485344	1	17	oxidoreductase activity, acting on the aldehyde or oxo group of donors
swd1∆	Sense	Upregulated	MF	GO:0004364	0.0477298	24.0323	0.0487248	1	8	glutathione transferase activity
swd1∆	Sense	Downregulated	BP	GO:0055086	0.047766	8.30319	0.373177	2	389	nucleobase-containing small molecule metabolic process
spp1∆	Sense	Upregulated	BP	GO:0018205	0.047887	23.1295	0.0489256	1	17	peptidyl-lysine modification
swd1∆	Antisense	Upregulated	BP	GO:0051567	0.047887	23.1295	0.0489256	1	17	histone H3-K9 methylation
swd1∆	Antisense	Upregulated	BP	GO:0031134	0.047887	23.1295	0.0489256	1	17	sister chromatid biorientation
swd1∆	Antisense	Upregulated	BP	GO:0007080	0.047887	23.1295	0.0489256	1	17	mitotic metaphase plate congression
swd1∆	Antisense	Upregulated	BP	GO:0050000	0.047887	23.1295	0.0489256	1	17	chromosome localization
swd1∆	Antisense	Upregulated	BP	GO:0051310	0.047887	23.1295	0.0489256	1	17	metaphase plate congression
swd1∆	Antisense	Upregulated	BP	GO:0051303	0.047887	23.1295	0.0489256	1	17	establishment of chromosome localization
ash2∆	Sense	Upregulated	BP	GO:0009065	0.047887	23.1295	0.0489256	1	15	glutamine family amino acid catabolic process
shg1∆	Sense	Downregulated	BP	GO:0009166	0.0479662	Inf	0.0479662	1	250	nucleotide catabolic process
swd2∆	Antisense	Upregulated	BP	GO:0048278	0.0480702	23.0267	0.0491174	1	16	vesicle docking
swd2∆	Antisense	Upregulated	BP	GO:0022406	0.0480702	23.0267	0.0491174	1	16	membrane docking
spp1∆	Antisense	Upregulated	MF	GO:0001882	0.0481122	1.8034	7.92729	13	595	nucleoside binding
swd1∆	Sense	Upregulated	BP	GO:0009308	0.0481349	3.18905	1.39179	4	234	amine metabolic process
ash2∆	Antisense	Downregulated	BP	GO:0051651	0.0482337	27.2222	0.0491174	1	64	maintenance of location in cell
sdc1∆	Antisense	Downregulated	BP	GO:0051651	0.0482337	27.2222	0.0491174	1	64	maintenance of location in cell
set1∆	Antisense	Downregulated	MF	GO:0034061	0.0484256	22.9035	0.0494861	1	20	DNA polymerase activity
sdc1∆	Sense	Upregulated	CC	GO:0005853	0.04848	25.5098	0.0494297	1	5	eukaryotic translation elongation factor 1 complex
sdc1∆	Sense	Upregulated	MF	GO:0031386	0.0485343	25.4804	0.0494861	1	5	protein tag
spp1∆	Antisense	Upregulated	CC	GO:0005618	0.0486285	3.90289	0.823384	3	61	cell wall
spp1∆	Antisense	Upregulated	CC	GO:0030312	0.0486285	3.90289	0.823384	3	61	external encapsulating structure
shg1∆	Antisense	Upregulated	BP	GO:0051651	0.0487292	6.11828	0.356101	2	64	maintenance of location in cell
swd1∆	Antisense	Downregulated	CC	GO:0005938	0.0488234	39.7597	0.0494297	1	130	cell cortex
swd3∆	Antisense	Upregulated	CC	GO:0005938	0.0488234	39.7597	0.0494297	1	130	cell cortex
swd2∆	Antisense	Upregulated	BP	GO:0032268	0.0488424	6.3118	0.359171	2	117	regulation of cellular protein metabolic process
sdc1∆	Sense	Upregulated	BP	GO:0006813	0.0489178	25.2745	0.0498849	1	5	potassium ion transport
sdc1∆	Sense	Upregulated	BP	GO:0006538	0.0489178	25.2745	0.0498849	1	5	glutamate catabolic process
ash2∆	Antisense	Downregulated	BP	GO:0051235	0.0489733	26.7917	0.0498849	1	65	maintenance of location
sdc1∆	Antisense	Downregulated	BP	GO:0051235	0.0489733	26.7917	0.0498849	1	65	maintenance of location
shg1∆	Antisense	Upregulated	BP	GO:0032321	0.0490134	23.1027	0.0500767	1	9	positive regulation of Rho GTPase activity
shg1∆	Antisense	Upregulated	BP	GO:0051057	0.0490134	23.1027	0.0500767	1	9	positive regulation of small GTPase mediated signal transduction
shg1∆	Antisense	Upregulated	BP	GO:0046579	0.0490134	23.1027	0.0500767	1	9	positive regulation of Ras protein signal transduction
shg1∆	Antisense	Upregulated	BP	GO:0010972	0.0490134	23.1027	0.0500767	1	9	negative regulation of G2/M transition of mitotic cell cycle
set1∆	Antisense	Upregulated	CC	GO:0000151	0.0492407	2.67358	2.0076	5	60	ubiquitin ligase complex
ash2∆	Sense	Downregulated	BP	GO:0016569	0.0492674	39.3876	0.0498849	1	130	covalent chromatin modification
ash2∆	Sense	Downregulated	BP	GO:0016570	0.0492674	39.3876	0.0498849	1	130	histone modification
swd2∆	Sense	Downregulated	BP	GO:0016569	0.0492674	39.3876	0.0498849	1	130	covalent chromatin modification
swd2∆	Sense	Downregulated	BP	GO:0016570	0.0492674	39.3876	0.0498849	1	130	histone modification
swd3∆	Sense	Downregulated	BP	GO:0016569	0.0492674	39.3876	0.0498849	1	130	covalent chromatin modification
swd3∆	Sense	Downregulated	BP	GO:0016570	0.0492674	39.3876	0.0498849	1	130	histone modification
sdc1∆	Sense	Upregulated	BP	GO:0009063	0.0495765	6.03059	0.359171	2	36	cellular amino acid catabolic process
swd2∆	Antisense	Upregulated	BP	GO:0044248	0.049578	3.00346	2.11205	5	688	cellular catabolic process
swd1∆	Sense	Upregulated	MF	GO:0016616	0.0495834	6.04094	0.359345	2	59	oxidoreductase activity, acting on the CH-OH group of donors, NAD or NADP as acceptor
spp1∆	Antisense	Upregulated	CC	GO:0009986	0.0496487	3.0695	1.3903	4	103	cell surface
shg1∆	Sense	Downregulated	BP	GO:0046700	0.049693	Inf	0.049693	1	259	heterocycle catabolic process
set1∆	Sense	Upregulated	MF	GO:0030246	0.0497105	6.03624	0.359916	2	31	carbohydrate binding
ash2∆	Antisense	Downregulated	BP	GO:0016197	0.0497124	26.3744	0.0506523	1	66	endosomal transport
sdc1∆	Antisense	Downregulated	BP	GO:0016197	0.0497124	26.3744	0.0506523	1	66	endosomal transport
set1∆	Antisense	Upregulated	BP	GO:0043087	0.0497411	2.66467	2.01305	5	61	regulation of GTPase activity
swd1∆	Antisense	Upregulated	MF	GO:0017111	0.0498848	4.17483	0.853635	3	299	nucleoside-triphosphatase activity
swd2∆	Antisense	Upregulated	CC	GO:0032153	0.0499332	4.13802	0.851711	3	280	cell division site
sdc1∆	Sense	Downregulated	BP	GO:0055085	0.0499369	6.72642	0.369532	2	214	transmembrane transport

## Sheet: Figure_1_(b)
Table Field Name	Descriptions
ProbeStrand	Sense, Antisense - Set includes genes with differential expression of coding sequence (sense) or antisense
UpDownRegulated	Upregulate, Downregulated, Both - Set includes genes that are upregulated (log2 fold-change vs. wildtype ≥ 0), downregulated (log2 FC ≤ 0), or both
GOCategory	Biological Process (BP), Cellular Component (CC), Molecular Function (MF) - top level GO ontology
GOID	Unique GO category term identifier
Pvalue	Hypergeometric test p value for category term over-enrichment
OddsRatio	Odds ratio for category term over-enrichment
ExpCount	Expected Count of genes associated with the GO category term
Count	Count of genes in the set associated with the GO category term
Size	Count of all S. pombe genes associated with the GO category term
Term	GO category term description
ProbeStrand	UpDownRegulated	GO.Category	GOID	Term	min_Pvalue	set1∆_Pvalue	ash2∆_Pvalue	sdc1∆_Pvalue	shg1∆_Pvalue	spp1∆_Pvalue	swd1∆_Pvalue	swd2∆_Pvalue	swd3∆_Pvalue	set1F_H3K4me-_Pvalue	H3K4R_Pvalue
Sense	Upregulated	BP	GO:0033554	cellular response to stress	1.05e-18	0.000279067	0.00340422	1.05e-18			2.16e-07
Sense	Upregulated	BP	GO:0051716	cellular response to stimulus	2.98e-18	0.000131571	0.00410156	2.98e-18			3.41e-07
Sense	Upregulated	BP	GO:0006950	response to stress	3.75e-18	0.000457662	0.0042746	3.75e-18			3.77e-07
Sense	Upregulated	BP	GO:0050896	response to stimulus	5.97e-17	0.000148063	0.00698157	5.97e-17			1.26e-06
Sense	Upregulated	MF	GO:0016491	oxidoreductase activity	3.56e-11		0.00132567	3.56e-11			2.86e-07
Sense	Upregulated	BP	GO:0070887	cellular response to chemical stimulus	8.05e-06			8.05e-06
Sense	Upregulated	MF	GO:0004022	alcohol dehydrogenase (NAD) activity	3.11e-05		0.000205	3.11e-05			0.00074055		0.00797111
Sense	Upregulated	BP	GO:0034599	cellular response to oxidative stress	3.54e-05			3.54e-05
Sense	Upregulated	BP	GO:0006979	response to oxidative stress	4.22e-05			4.22e-05
Sense	Upregulated	BP	GO:0006091	generation of precursor metabolites and energy	4.68e-05		4.68e-05	0.00184278			0.000103003
Sense	Upregulated	BP	GO:0016052	carbohydrate catabolic process	6.01e-05		0.00155698	0.00577442			6.01e-05	0.00653689
Sense	Upregulated	MF	GO:0010181	FMN binding	7.14e-05						7.14e-05
Sense	Upregulated	MF	GO:0016206	catechol O-methyltransferase activity	9.61e-05		0.0064614	9.61e-05
Sense	Upregulated	MF	GO:0048029	monosaccharide binding	0.000108939						0.000108939
Sense	Upregulated	BP	GO:0042221	response to chemical stimulus	0.000132185			0.000132185
Sense	Upregulated	BP	GO:0046164	alcohol catabolic process	0.000166047		0.000455401	0.00123991			0.000166047	0.00286947
Sense	Upregulated	BP	GO:0006007	glucose catabolic process	0.000174062		0.00386074	0.000174062			0.000627105	0.00105056
Sense	Upregulated	MF	GO:0016616	oxidoreductase activity, acting on the CH-OH group of donors, NAD or NADP as acceptor	0.000260923			0.000260923
Sense	Upregulated	MF	GO:0003824	catalytic activity	0.000266879		0.00519075	0.00451309			0.000266879
Sense	Upregulated	CC	GO:0005886	plasma membrane	0.000272723	0.000272723
Sense	Upregulated	CC	GO:0005829	cytosol	0.000311136			0.000470203			0.000311136
Sense	Upregulated	BP	GO:0019320	hexose catabolic process	0.000327577		0.00528381	0.000327577			0.00100652	0.00144514
Sense	Upregulated	MF	GO:0016614	oxidoreductase activity, acting on CH-OH group of donors	0.000382821			0.000382821
Sense	Upregulated	MF	GO:0051184	cofactor transporter activity	0.000392118	0.000392118
Sense	Upregulated	MF	GO:0003729	mRNA binding	0.00049805				0.00049805
Sense	Upregulated	MF	GO:0015171	amino acid transmembrane transporter activity	0.000530983							0.00191022	0.000530983
Sense	Upregulated	MF	GO:0016903	oxidoreductase activity, acting on the aldehyde or oxo group of donors	0.00056392			0.00056392
Sense	Upregulated	BP	GO:0006096	glycolysis	0.000577208			0.000577208			0.00440487
Sense	Upregulated	MF	GO:0046943	carboxylic acid transmembrane transporter activity	0.000673062							0.00241522	0.000673062
Sense	Upregulated	MF	GO:0005342	organic acid transmembrane transporter activity	0.000711161							0.00255032	0.000711161
Sense	Upregulated	BP	GO:0046365	monosaccharide catabolic process	0.000745408		0.00798612	0.000745408			0.00186981	0.00220208
Sense	Upregulated	BP	GO:0006115	ethanol biosynthetic process	0.00076746		0.0032617	0.00997698			0.00594781	0.00172678	0.00076746
Sense	Upregulated	BP	GO:0034309	primary alcohol biosynthetic process	0.00076746		0.0032617	0.00997698			0.00594781	0.00172678	0.00076746
Sense	Upregulated	BP	GO:0043458	ethanol biosynthetic process involved in glucose fermentation to ethanol	0.00076746		0.0032617	0.00997698			0.00594781	0.00172678	0.00076746
Sense	Upregulated	MF	GO:0030246	carbohydrate binding	0.000821779						0.000821779
Sense	Upregulated	BP	GO:0042026	protein refolding	0.000957836			0.000957836
Sense	Upregulated	MF	GO:0005275	amine transmembrane transporter activity	0.000961289							0.00343423	0.000961289
Sense	Upregulated	BP	GO:0007126	meiosis	0.00100698				0.00100698	0.00202034
Sense	Upregulated	BP	GO:0051327	M phase of meiotic cell cycle	0.00100698				0.00100698	0.00202034
Sense	Upregulated	BP	GO:0051321	meiotic cell cycle	0.00105205				0.00105205	0.00213488
Sense	Upregulated	MF	GO:0005215	transporter activity	0.00109598	0.00109598						0.00334985	0.00407651
Sense	Upregulated	CC	GO:0044459	plasma membrane part	0.00113087	0.00113087
Sense	Upregulated	MF	GO:0022891	substrate-specific transmembrane transporter activity	0.00115136							0.00818704	0.00115136
Sense	Upregulated	BP	GO:0006006	glucose metabolic process	0.00123991			0.00123991			0.00274997	0.00286947
Sense	Upregulated	BP	GO:0006066	alcohol metabolic process	0.00155941		0.00155941				0.00240667
Sense	Upregulated	CC	GO:0005887	integral to plasma membrane	0.00157157	0.00157157
Sense	Upregulated	MF	GO:0022857	transmembrane transporter activity	0.00168908	0.00360272						0.00168908	0.00239072
Sense	Upregulated	BP	GO:0006012	galactose metabolic process	0.00183545	0.00183545
Sense	Upregulated	BP	GO:0051180	vitamin transport	0.00183545	0.00183545
Sense	Upregulated	MF	GO:0004332	fructose-bisphosphate aldolase activity	0.00209364						0.0060906	0.00209364
Sense	Upregulated	MF	GO:0022892	substrate-specific transporter activity	0.00221576								0.00221576
Sense	Upregulated	BP	GO:0000947	amino acid catabolic process to alcohol via Ehrlich pathway	0.00230105		0.0097551					0.0051724	0.00230105
Sense	Upregulated	BP	GO:0000955	amino acid catabolic process via Ehrlich pathway	0.00230105		0.0097551					0.0051724	0.00230105
Sense	Upregulated	BP	GO:0019655	glucose catabolic process to ethanol	0.00230105		0.0097551					0.0051724	0.00230105
Sense	Upregulated	BP	GO:0019660	glycolytic fermentation	0.00230105		0.0097551					0.0051724	0.00230105
Sense	Upregulated	BP	GO:0000733	DNA strand renaturation	0.00230128				0.00230128	0.00574822
Sense	Upregulated	BP	GO:0033621	nuclear-transcribed mRNA catabolic process, meiosis-specific transcripts	0.00230128				0.00230128
Sense	Upregulated	BP	GO:0008655	pyrimidine-containing compound salvage	0.00255095	0.00255095
Sense	Upregulated	BP	GO:0055085	transmembrane transport	0.00257863	0.00257863
Sense	Upregulated	MF	GO:0004364	glutathione transferase activity	0.00258983			0.00258983
Sense	Upregulated	MF	GO:0004601	peroxidase activity	0.00258983			0.00258983
Sense	Upregulated	MF	GO:0008171	O-methyltransferase activity	0.00258983			0.00258983
Sense	Upregulated	MF	GO:0016684	oxidoreductase activity, acting on peroxide as acceptor	0.00258983			0.00258983
Sense	Upregulated	MF	GO:0004328	formamidase activity	0.00285497					0.00285497
Sense	Upregulated	CC	GO:0031226	intrinsic to plasma membrane	0.00292512	0.00292512
Sense	Upregulated	BP	GO:0019318	hexose metabolic process	0.0030228			0.0030228			0.00543132	0.00460125
Sense	Upregulated	MF	GO:0004065	arylsulfatase activity	0.00323563		0.00323563
Sense	Upregulated	MF	GO:0008484	sulfuric ester hydrolase activity	0.00323563		0.00323563
Sense	Upregulated	MF	GO:0016810	hydrolase activity, acting on carbon-nitrogen (but not peptide) bonds	0.00337234	0.00337234
Sense	Upregulated	MF	GO:0015204	urea transmembrane transporter activity	0.0034227							0.00626898	0.0034227
Sense	Upregulated	MF	GO:0042887	amide transmembrane transporter activity	0.0034227							0.00626898	0.0034227
Sense	Upregulated	BP	GO:0043489	RNA stabilization	0.00345026				0.00345026	0.00861074
Sense	Upregulated	BP	GO:0045002	double-strand break repair via single-strand annealing	0.00345026				0.00345026	0.00861074
Sense	Upregulated	BP	GO:0048255	mRNA stabilization	0.00345026				0.00345026	0.00861074
Sense	Upregulated	MF	GO:0051183	vitamin transporter activity	0.00354971	0.00354971
Sense	Upregulated	CC	GO:0016604	nuclear body	0.00455623				0.00455623
Sense	Upregulated	CC	GO:0033620	Mei2 nuclear dot	0.00455623				0.00455623
Sense	Upregulated	MF	GO:0000150	recombinase activity	0.00456143				0.00456143
Sense	Upregulated	BP	GO:0006067	ethanol metabolic process	0.00459813								0.00459813
Sense	Upregulated	BP	GO:0006113	fermentation	0.00459813								0.00459813
Sense	Upregulated	BP	GO:0034308	primary alcohol metabolic process	0.00459813								0.00459813
Sense	Upregulated	BP	GO:0009408	response to heat	0.00489555			0.00489555
Sense	Upregulated	BP	GO:0034605	cellular response to heat	0.00489555			0.00489555
Sense	Upregulated	MF	GO:0016620	oxidoreductase activity, acting on the aldehyde or oxo group of donors, NAD or NADP as acceptor	0.00499135			0.00499135
Sense	Upregulated	BP	GO:0009266	response to temperature stimulus	0.00530333			0.00530333
Sense	Upregulated	BP	GO:0006116	NADH oxidation	0.00536295								0.00536295
Sense	Upregulated	BP	GO:0000711	meiotic DNA repair synthesis	0.00574491				0.00574491
Sense	Upregulated	BP	GO:0009063	cellular amino acid catabolic process	0.00591101		0.00591101
Sense	Upregulated	BP	GO:0001407	glycerophosphodiester transport	0.00594781						0.00594781
Sense	Upregulated	BP	GO:0005994	melibiose metabolic process	0.00594781						0.00594781
Sense	Upregulated	BP	GO:0005995	melibiose catabolic process	0.00594781						0.00594781
Sense	Upregulated	BP	GO:0006677	glycosylceramide metabolic process	0.00594781						0.00594781
Sense	Upregulated	BP	GO:0015748	organophosphate ester transport	0.00594781						0.00594781
Sense	Upregulated	BP	GO:0019377	glycolipid catabolic process	0.00594781						0.00594781
Sense	Upregulated	BP	GO:0046477	glycosylceramide catabolic process	0.00594781						0.00594781
Sense	Upregulated	BP	GO:0046514	ceramide catabolic process	0.00594781						0.00594781
Sense	Upregulated	BP	GO:0046521	sphingoid catabolic process	0.00594781						0.00594781
Sense	Upregulated	BP	GO:0051085	chaperone mediated protein folding requiring cofactor	0.00594781			0.00997698			0.00594781
Sense	Upregulated	MF	GO:0001406	glycerophosphodiester transmembrane transporter activity	0.0060906						0.0060906
Sense	Upregulated	MF	GO:0004557	alpha-galactosidase activity	0.0060906						0.0060906
Sense	Upregulated	MF	GO:0008514	organic anion transmembrane transporter activity	0.0060906						0.0060906
Sense	Upregulated	MF	GO:0015605	organophosphate ester transmembrane transporter activity	0.0060906						0.0060906
Sense	Upregulated	MF	GO:0015925	galactosidase activity	0.0060906						0.0060906
Sense	Upregulated	BP	GO:0006734	NADH metabolic process	0.00612732								0.00612732
Sense	Upregulated	CC	GO:0000015	phosphopyruvate hydratase complex	0.00645405		0.00645405
Sense	Upregulated	MF	GO:0003935	GTP cyclohydrolase II activity	0.0064614		0.0064614
Sense	Upregulated	MF	GO:0004371	glycerone kinase activity	0.0064614		0.0064614
Sense	Upregulated	MF	GO:0004634	phosphopyruvate hydratase activity	0.0064614		0.0064614
Sense	Upregulated	MF	GO:0009013	succinate-semialdehyde dehydrogenase [NAD(P)+] activity	0.0064614		0.0064614
Sense	Upregulated	BP	GO:0000730	DNA recombinase assembly	0.00689059				0.00689059
Sense	Upregulated	BP	GO:0045003	double-strand break repair via synthesis-dependent strand annealing	0.00689059				0.00689059
Sense	Upregulated	BP	GO:0051260	protein homooligomerization	0.00689059				0.00689059
Sense	Upregulated	BP	GO:0019430	removal of superoxide radicals	0.00709876			0.00709876
Sense	Upregulated	BP	GO:0042542	response to hydrogen peroxide	0.00709876			0.00709876
Sense	Upregulated	BP	GO:0070301	cellular response to hydrogen peroxide	0.00709876			0.00709876
Sense	Upregulated	BP	GO:0000279	M phase	0.00711203				0.00711203
Sense	Upregulated	BP	GO:0009310	amine catabolic process	0.00726256		0.00726256
Sense	Upregulated	BP	GO:0016054	organic acid catabolic process	0.00726256		0.00726256
Sense	Upregulated	BP	GO:0046395	carboxylic acid catabolic process	0.00726256		0.00726256
Sense	Upregulated	BP	GO:0046165	alcohol biosynthetic process	0.00764568			0.00764568
Sense	Upregulated	BP	GO:0042125	protein galactosylation	0.00773069	0.00773069
Sense	Upregulated	BP	GO:0005996	monosaccharide metabolic process	0.00781093			0.00797235				0.00781093
Sense	Upregulated	CC	GO:0031105	septin complex	0.00796204				0.00796204
Sense	Upregulated	MF	GO:0008143	poly(A) RNA binding	0.00797111				0.00797111
Sense	Upregulated	MF	GO:0070717	poly-purine tract binding	0.00797111				0.00797111
Sense	Upregulated	BP	GO:0043487	regulation of RNA stability	0.00803516				0.00803516
Sense	Upregulated	BP	GO:0043488	regulation of mRNA stability	0.00803516				0.00803516
Sense	Upregulated	BP	GO:0045835	negative regulation of meiosis	0.00803516				0.00803516
Sense	Upregulated	MF	GO:0019239	deaminase activity	0.0081208	0.0081208
Sense	Upregulated	BP	GO:0009112	nucleobase metabolic process	0.00814837	0.00814837
Sense	Upregulated	MF	GO:0022804	active transmembrane transporter activity	0.00815947								0.00815947
Sense	Upregulated	MF	GO:0016832	aldehyde-lyase activity	0.00835069							0.00835069
Sense	Upregulated	BP	GO:0006725	cellular aromatic compound metabolic process	0.00859817	0.00859817
Sense	Upregulated	BP	GO:0031990	mRNA export from nucleus in response to heat stress	0.00861074					0.00861074
Sense	Upregulated	BP	GO:0032889	regulation of vacuole fusion, non-autophagic	0.00861074					0.00861074
Sense	Upregulated	BP	GO:0006406	mRNA export from nucleus	0.00874538					0.00874538
Sense	Upregulated	BP	GO:0051028	mRNA transport	0.00874538					0.00874538
Sense	Upregulated	CC	GO:0032156	septin cytoskeleton	0.00909516				0.00909516
Sense	Upregulated	BP	GO:0051259	protein oligomerization	0.00917864				0.00917864
Sense	Upregulated	MF	GO:0003933	GTP cyclohydrolase activity	0.00967735		0.00967735
Sense	Upregulated	MF	GO:0003959	NADPH dehydrogenase activity	0.00967735		0.00967735
Sense	Upregulated	MF	GO:0004365	glyceraldehyde-3-phosphate dehydrogenase (NAD+) (phosphorylating) activity	0.00989722			0.00989722
Sense	Upregulated	MF	GO:0004618	phosphoglycerate kinase activity	0.00989722			0.00989722
Sense	Upregulated	MF	GO:0008941	nitric oxide dioxygenase activity	0.00989722			0.00989722
Sense	Upregulated	MF	GO:0016652	oxidoreductase activity, acting on NAD(P)H, NAD(P) as acceptor	0.00989722			0.00989722
Sense	Upregulated	MF	GO:0016708	oxidoreductase activity, acting on paired donors, with incorporation or reduction of molecular oxygen, NAD(P)H as one donor, and incorporation of two atoms of oxygen into one donor	0.00989722			0.00989722
Sense	Upregulated	MF	GO:0047018	indole-3-acetaldehyde reductase (NADH) activity	0.00989722			0.00989722
Sense	Upregulated	MF	GO:0047019	indole-3-acetaldehyde reductase (NADPH) activity	0.00989722			0.00989722
Sense	Upregulated	MF	GO:0051268	alpha-keto amide reductase activity	0.00989722			0.00989722
Sense	Upregulated	MF	GO:0051269	alpha-keto ester reductase activity	0.00989722			0.00989722
Sense	Upregulated	BP	GO:0051410	detoxification of nitrogen compound	0.00997698			0.00997698
Sense	Upregulated	BP	GO:0070297	regulation of phosphorelay signal transduction system	0.00997698			0.00997698
Sense	Upregulated	BP	GO:0070458	cellular detoxification of nitrogen compound	0.00997698			0.00997698
Sense	Downregulated	BP	GO:0042026	protein refolding	0.000168802	0.000168802
Sense	Downregulated	BP	GO:0055085	transmembrane transport	0.000191771	0.000191771
Sense	Downregulated	CC	GO:0005886	plasma membrane	0.000280308			0.000280308
Sense	Downregulated	MF	GO:0004352	glutamate dehydrogenase (NAD+) activity	0.000380662		0.000380662	0.00190331
Sense	Downregulated	BP	GO:0019551	glutamate catabolic process to 2-oxoglutarate	0.00038373		0.00038373	0.00172678
Sense	Downregulated	MF	GO:0022857	transmembrane transporter activity	0.000646617	0.000646617
Sense	Downregulated	BP	GO:0000722	telomere maintenance via recombination	0.00076746			0.00689125	0.00076746
Sense	Downregulated	CC	GO:0044459	plasma membrane part	0.000791872			0.000791872
Sense	Downregulated	BP	GO:0006457	protein folding	0.000891576	0.000891576
Sense	Downregulated	BP	GO:0046942	carboxylic acid transport	0.000978985			0.000978985
Sense	Downregulated	BP	GO:0015849	organic acid transport	0.00105056			0.00105056
Sense	Downregulated	MF	GO:0015343	siderophore transmembrane transporter activity	0.00114177						0.00285279	0.00114177	0.00114177
Sense	Downregulated	MF	GO:0016639	oxidoreductase activity, acting on the CH-NH2 group of donors, NAD or NADP as acceptor	0.00114177		0.00114177	0.00570016
Sense	Downregulated	MF	GO:0042927	siderophore transporter activity	0.00114177						0.00285279	0.00114177	0.00114177
Sense	Downregulated	BP	GO:0006106	fumarate metabolic process	0.00115097		0.00115097	0.0051724
Sense	Downregulated	MF	GO:0043138	3'-5' DNA helicase activity	0.00133232				0.00133232
Sense	Downregulated	MF	GO:0043140	ATP-dependent 3'-5' DNA helicase activity	0.00133232				0.00133232
Sense	Downregulated	MF	GO:0051082	unfolded protein binding	0.00145215	0.00145215
Sense	Downregulated	BP	GO:0015891	siderophore transport	0.00153448						0.00383288	0.00153448	0.00153448
Sense	Downregulated	MF	GO:0005215	transporter activity	0.00171169	0.00171169		0.00223994
Sense	Downregulated	CC	GO:0048189	Lid2 complex	0.00190042		0.00190042	0.00947322
Sense	Downregulated	MF	GO:0004151	dihydroorotase activity	0.00190259						0.00190259
Sense	Downregulated	BP	GO:0006538	glutamate catabolic process	0.00191791		0.00191791	0.00860745
Sense	Downregulated	BP	GO:0033214	iron assimilation by chelation and transport	0.00191791						0.00478926	0.00191791	0.00191791
Sense	Downregulated	BP	GO:0006103	2-oxoglutarate metabolic process	0.00230128		0.00230128
Sense	Downregulated	CC	GO:0005887	integral to plasma membrane	0.00294936			0.00294936
Sense	Downregulated	CC	GO:0035097	histone methyltransferase complex	0.0030398		0.0030398				0.00758434	0.0030398	0.0030398
Sense	Downregulated	CC	GO:0048188	Set1C/COMPASS complex	0.0030398		0.0030398				0.00758434	0.0030398	0.0030398
Sense	Downregulated	BP	GO:0033212	iron assimilation	0.00306778						0.007654	0.00306778	0.00306778
Sense	Downregulated	BP	GO:0015878	biotin transport	0.00345092			0.00345092
Sense	Downregulated	BP	GO:0042883	cysteine transport	0.00345092			0.00345092
Sense	Downregulated	BP	GO:0042886	amide transport	0.00345092			0.00345092
Sense	Downregulated	BP	GO:0006312	mitotic recombination	0.00345357				0.00345357
Sense	Downregulated	MF	GO:0032553	ribonucleotide binding	0.00370169	0.00370169
Sense	Downregulated	MF	GO:0032555	purine ribonucleotide binding	0.00370169	0.00370169
Sense	Downregulated	MF	GO:0016812	hydrolase activity, acting on carbon-nitrogen (but not peptide) bonds, in cyclic amides	0.00380228						0.00380228
Sense	Downregulated	MF	GO:0005381	iron ion transmembrane transporter activity	0.00380336						0.009484	0.00380336	0.00380336
Sense	Downregulated	MF	GO:0015225	biotin transporter activity	0.00380336			0.00380336
Sense	Downregulated	MF	GO:0033229	cysteine transmembrane transporter activity	0.00380336			0.00380336
Sense	Downregulated	CC	GO:0031226	intrinsic to plasma membrane	0.00410065			0.00410065
Sense	Downregulated	MF	GO:0042800	histone methyltransferase activity (H3-K4 specific)	0.00418729	0.00418729
Sense	Downregulated	BP	GO:0006830	high-affinity zinc ion transport	0.00422103	0.00422103
Sense	Downregulated	BP	GO:0010892	positive regulation of mitochondrial translation in response to stress	0.00422103	0.00422103
Sense	Downregulated	BP	GO:0032056	positive regulation of translation in response to stress	0.00422103	0.00422103
Sense	Downregulated	BP	GO:0043335	protein unfolding	0.00422103	0.00422103
Sense	Downregulated	BP	GO:0033554	cellular response to stress	0.00436323	0.00436323
Sense	Downregulated	MF	GO:0016638	oxidoreductase activity, acting on the CH-NH2 group of donors	0.00456317		0.00456317
Sense	Downregulated	MF	GO:0046915	transition metal ion transmembrane transporter activity	0.00473723	0.00473723						0.00949482	0.00949482
Sense	Downregulated	BP	GO:0000101	sulfur amino acid transport	0.0051724			0.0051724
Sense	Downregulated	BP	GO:0015718	monocarboxylic acid transport	0.0051724			0.0051724
Sense	Downregulated	MF	GO:0017076	purine nucleotide binding	0.00521868	0.00521868
Sense	Downregulated	CC	GO:0034708	methyltransferase complex	0.00531662		0.00531662					0.00531662	0.00531662
Sense	Downregulated	BP	GO:0051716	cellular response to stimulus	0.00533937	0.00533937
Sense	Downregulated	BP	GO:0051568	histone H3-K4 methylation	0.00536552		0.00536552					0.00536552	0.00536552
Sense	Downregulated	BP	GO:0006950	response to stress	0.00558347	0.00558347
Sense	Downregulated	CC	GO:0030287	cell wall-bounded periplasmic space	0.00569367			0.00569367
Sense	Downregulated	CC	GO:0034064	Tor2-Mei2-Ste11 complex	0.00569367			0.00569367
Sense	Downregulated	CC	GO:0042597	periplasmic space	0.00569367			0.00569367
Sense	Downregulated	MF	GO:0000099	sulfur amino acid transmembrane transporter activity	0.00570016			0.00570016
Sense	Downregulated	BP	GO:0009065	glutamine family amino acid catabolic process	0.00574822		0.00574822
Sense	Downregulated	BP	GO:0045836	positive regulation of meiosis	0.00689125			0.00689125
Sense	Downregulated	BP	GO:0065008	regulation of biological quality	0.00735052	0.00735052
Sense	Downregulated	CC	GO:0000781	chromosome, telomeric region	0.00741445				0.00741445
Sense	Downregulated	BP	GO:0042592	homeostatic process	0.00747279	0.00747279
Sense	Downregulated	CC	GO:0016604	nuclear body	0.00758506			0.00758506
Sense	Downregulated	CC	GO:0033620	Mei2 nuclear dot	0.00758506			0.00758506
Sense	Downregulated	MF	GO:0004003	ATP-dependent DNA helicase activity	0.00761325				0.00761325
Sense	Downregulated	MF	GO:0031072	heat shock protein binding	0.00769473	0.00769473
Sense	Downregulated	MF	GO:0000166	nucleotide binding	0.00774348	0.00774348
Sense	Downregulated	MF	GO:0003678	DNA helicase activity	0.00799391				0.00799391
Sense	Downregulated	MF	GO:0003935	GTP cyclohydrolase II activity	0.00835783	0.00835783
Sense	Downregulated	MF	GO:0004371	glycerone kinase activity	0.00835783	0.00835783
Sense	Downregulated	BP	GO:0010106	cellular response to iron ion starvation	0.00842505	0.00842505
Sense	Downregulated	BP	GO:0010821	regulation of mitochondrion organization	0.00842505	0.00842505
Sense	Downregulated	BP	GO:0010822	positive regulation of mitochondrion organization	0.00842505	0.00842505
Sense	Downregulated	BP	GO:0033217	regulation of transcription from RNA polymerase II promoter in response to iron ion starvation	0.00842505	0.00842505
Sense	Downregulated	BP	GO:0050821	protein stabilization	0.00842505	0.00842505
Sense	Downregulated	BP	GO:0070129	regulation of mitochondrial translation	0.00842505	0.00842505
Sense	Downregulated	BP	GO:0070131	positive regulation of mitochondrial translation	0.00842505	0.00842505
Sense	Downregulated	BP	GO:0010563	negative regulation of phosphorus metabolic process	0.00860745			0.00860745
Sense	Downregulated	BP	GO:0042326	negative regulation of phosphorylation	0.00860745			0.00860745
Sense	Downregulated	BP	GO:0045936	negative regulation of phosphate metabolic process	0.00860745			0.00860745
Sense	Downregulated	BP	GO:0006879	cellular iron ion homeostasis	0.00918919							0.00918919	0.00918919
Sense	Downregulated	BP	GO:0055072	iron ion homeostasis	0.00918919							0.00918919	0.00918919
Sense	Downregulated	BP	GO:0009408	response to heat	0.00930283	0.00930283
Sense	Downregulated	BP	GO:0034605	cellular response to heat	0.00930283	0.00930283
Sense	Downregulated	BP	GO:0050896	response to stimulus	0.00947379	0.00947379
Sense	Downregulated	MF	GO:0004860	protein kinase inhibitor activity	0.009484			0.009484
Sense	Downregulated	MF	GO:0005315	inorganic phosphate transmembrane transporter activity	0.009484			0.009484
Sense	Downregulated	MF	GO:0015114	phosphate ion transmembrane transporter activity	0.009484			0.009484
Sense	Downregulated	MF	GO:0019210	kinase inhibitor activity	0.009484			0.009484
Sense	Downregulated	BP	GO:0019856	pyrimidine nucleobase biosynthetic process	0.00956016						0.00956016
Sense	Downregulated	BP	GO:0006536	glutamate metabolic process	0.00957115		0.00957115
Sense	Downregulated	BP	GO:0009266	response to temperature stimulus	0.009825	0.009825
