# Supplementary material for: Heterochromatin assembly and transcriptome repression by Set1 in coordination with a class II histone deacetylase
Source: eLife journal article supplement (doi:10.7554/elife.04506), 2014-12-15
Supplement: supp [file elife_poa_e04506_Figure_5_source_data_1.xlsx]

## Sheet: Figure 5_Table S1
Table Field Name	Descriptions
Experiment	indicated deletion mutant vs. wildtype array experiment
ProbeStrand	Sense, Antisense - Set includes genes with differential expression of coding sequence (sense) or antisense
UpDownRegulated	Upregulate, Downregulated, Both - Set includes genes that are upregulated (log2 fold-change vs. wildtype ≥ 0), downregulated (log2 FC ≤ 0), or both
GOCategory	Biological Process (BP), Cellular Component (CC), Molecular Function (MF) - top level GO ontology
GOID	Unique GO category term identifier
Pvalue	Hypergeometric test p value for category term over-enrichment
OddsRatio	Odds ratio for category term over-enrichment
ExpCount	Expected Count of genes associated with the GO category term
Count	Count of genes in the set associated with the GO category term
Size	Count of all S. pombe genes associated with the GO category term
Term	GO category term description
Experiment	ProbeStrand	UpregulatedDownRegulated	GOCategory	GOID	Pvalue	OddsRatio	ExpCount	Count	Size	Term
set1∆ clr3∆	Sense	Upregulated	BP	GO:0033554	6.12e-33	6.68062	25.7099	93	670	cellular response to stress
set1∆ clr3∆	Sense	Upregulated	BP	GO:0051716	1.42e-32	6.54566	26.5541	94	692	cellular response to stimulus
set1∆ clr3∆	Sense	Upregulated	BP	GO:0006950	1.68e-31	6.34313	26.746	93	697	response to stress
set1∆ clr3∆	Sense	Upregulated	BP	GO:0050896	1.01e-30	6.04449	29.1635	96	760	response to stimulus
set1∆ clr3∆	Sense	Upregulated	MF	GO:0016491	1.75e-14	5.18161	10.6646	41	272	oxidoreductase activity
set1∆ clr3∆	Sense	Upregulated	MF	GO:0016614	1.4e-08	8.01207	2.50933	15	64	oxidoreductase activity, acting on CH-OH groUpregulated of donors
set1∆ clr3∆	Sense	Upregulated	MF	GO:0016616	3.65e-08	8.10671	2.31329	14	59	oxidoreductase activity, acting on the CH-OH groUpregulated of donors, NAD or NADP as acceptor
set1F_H3K4me- clr3∆	Sense	Upregulated	BP	GO:0033554	8.73106e-07	10.3359	2.57099	12	670	cellular response to stress
set1∆ clr3∆	Sense	Downregulated	BP	GO:0006520	9.47e-07	5.47097	3.38853	15	203	cellular amino acid metabolic process
set1∆ clr3∆	Sense	Downregulated	BP	GO:0044106	9.47e-07	5.47097	3.38853	15	203	cellular amine metabolic process
set1F_H3K4me- clr3∆	Sense	Upregulated	BP	GO:0051716	1.24599e-06	9.95294	2.65541	12	692	cellular response to stimulus
set1F_H3K4me- clr3∆	Sense	Upregulated	BP	GO:0006950	1.34849e-06	9.86934	2.6746	12	697	response to stress
set1∆ clr3∆	Sense	Upregulated	MF	GO:0050662	3.28e-06	4.87696	3.72478	15	95	coenzyme binding
set1F_H3K4me- clr3∆	Sense	Upregulated	BP	GO:0050896	3.46769e-06	8.91176	2.91635	12	760	response to stimulus
set1∆ clr3∆	Sense	Downregulated	BP	GO:0043436	3.81e-06	4.34992	4.80737	17	288	oxoacid metabolic process
set1∆ clr3∆	Sense	Downregulated	BP	GO:0019752	3.81e-06	4.34992	4.80737	17	288	carboxylic acid metabolic process
set1∆ clr3∆	Sense	Downregulated	BP	GO:0006082	3.81e-06	4.34992	4.80737	17	288	organic acid metabolic process
set1∆ clr3∆	Sense	Upregulated	BP	GO:0034599	4.15e-06	6.08838	2.45587	12	64	cellular response to oxidative stress
set1∆ clr3∆	Sense	Downregulated	CC	GO:0005730	4.46e-06	3.93763	5.95437	19	348	nucleolus
set1∆ clr3∆	Sense	Downregulated	BP	GO:0009308	5.66e-06	4.66705	3.90599	15	234	amine metabolic process
set1∆ clr3∆	Sense	Upregulated	BP	GO:0006979	5.82e-06	5.86052	2.53262	12	66	response to oxidative stress
set1∆ clr3∆	Sense	Downregulated	BP	GO:0042180	6.64e-06	4.15517	5.00767	17	300	cellular ketone metabolic process
set1∆ clr3∆	Sense	Upregulated	BP	GO:0070887	1.01e-05	4.38462	4.06754	15	106	cellular response to chemical stimulus
set1∆ clr3∆	Sense	Upregulated	BP	GO:0019400	1.71e-05	25.6769	0.38373	5	10	alditol metabolic process
set1∆ clr3∆	Sense	Upregulated	MF	GO:0048037	3.63e-05	3.51365	5.60678	17	143	cofactor binding
set1F_H3K4me- clr3∆	Sense	Upregulated	MF	GO:0004457	4.55433e-05	550.737	0.0119909	2	3	lactate dehydrogenase activity
set1∆ clr3∆	Sense	Upregulated	BP	GO:0006314	5.57e-05	Inf	0.115119	3	3	intron homing
clr3∆	Sense	Upregulated	BP	GO:0032787	6.50423e-05	14.4858	0.446086	5	93	monocarboxylic acid metabolic process
clr3∆	Sense	Upregulated	MF	GO:0004457	7.60642e-05	418.08	0.0154168	2	3	lactate dehydrogenase activity
set1∆ clr3∆	Sense	Upregulated	BP	GO:0042221	8.42e-05	3.25671	5.98619	17	156	response to chemical stimulus
set1∆ clr3∆	Sense	Downregulated	BP	GO:0019509	8.67e-05	60.9762	0.100153	3	6	L-methionine salvage from methylthioadenosine
set1∆ clr3∆	Sense	Downregulated	BP	GO:0043102	8.67e-05	60.9762	0.100153	3	6	amino acid salvage
set1∆ clr3∆	Sense	Upregulated	MF	GO:0022857	0.000120236	2.57411	10.5862	24	270	transmembrane transporter activity
set1∆ clr3∆	Sense	Downregulated	BP	GO:0034660	0.000133943	3.46077	5.10783	15	306	ncRNA metabolic process
set1∆ clr3∆	Sense	Upregulated	BP	GO:0055085	0.000174308	2.75945	8.21182	20	214	transmembrane transport
set1F_H3K4me- clr3∆	Sense	Upregulated	BP	GO:0006089	0.000207943	144.111	0.0230238	2	6	lactate metabolic process
set1∆ clr3∆	Sense	Upregulated	BP	GO:0006071	0.000227845	20.4367	0.345357	4	9	glycerol metabolic process
set1∆ clr3∆	Sense	Upregulated	BP	GO:0019751	0.000244624	11.6573	0.613968	5	16	polyol metabolic process
set1∆ clr3∆	Sense	Downregulated	BP	GO:0006807	0.000283894	2.16814	29.0445	45	1740	nitrogen compound metabolic process
clr3∆	Sense	Upregulated	BP	GO:0006089	0.00032749	112.674	0.0287797	2	6	lactate metabolic process
set1∆ clr3∆	Sense	Upregulated	BP	GO:0051039	0.000368375	17.0272	0.38373	4	10	positive regulation of transcription during meiosis
set1∆ clr3∆	Sense	Downregulated	BP	GO:0034470	0.000378039	3.41133	4.40675	13	264	ncRNA processing
set1∆ clr3∆	Sense	Upregulated	BP	GO:0016052	0.000415313	4.1345	2.80123	10	73	carbohydrate catabolic process
set1∆ clr3∆	Sense	Downregulated	BP	GO:0034404	0.000421151	13.6734	0.367229	4	22	nucleobase-containing small molecule biosynthetic process
set1∆ clr3∆	Sense	Downregulated	BP	GO:0034654	0.000421151	13.6734	0.367229	4	22	nucleobase-containing compound biosynthetic process
set1∆ clr3∆	Sense	Downregulated	BP	GO:0046148	0.000421151	13.6734	0.367229	4	22	pigment biosynthetic process
set1∆ clr3∆	Sense	Downregulated	BP	GO:0009396	0.000495379	26.1122	0.166922	3	10	folic acid-containing compound biosynthetic process
set1∆ clr3∆	Sense	Downregulated	BP	GO:0043094	0.000503361	12.9512	0.383922	4	23	cellular metabolic compound salvage
clr3∆	Sense	Upregulated	MF	GO:0015171	0.000543673	22.4052	0.164446	3	32	amino acid transmembrane transporter activity
set1F_H3K4me- clr3∆	Sense	Downregulated	MF	GO:0070818	0.000570994	Inf	0.000570994	1	1	protoporphyrinogen oxidase activity
set1F_H3K4me- clr3∆	Sense	Downregulated	MF	GO:0004729	0.000570994	Inf	0.000570994	1	1	oxygen-dependent protoporphyrinogen oxidase activity
set1∆ clr3∆	Sense	Downregulated	BP	GO:0042440	0.000596389	12.3012	0.400614	4	24	pigment metabolic process
clr3∆	Sense	Upregulated	BP	GO:0033554	0.000612572	4.57273	3.21374	10	670	cellular response to stress
set1∆ clr3∆	Sense	Downregulated	BP	GO:0006760	0.000672946	22.8438	0.183615	3	11	folic acid-containing compound metabolic process
set1∆ clr3∆	Sense	Downregulated	BP	GO:0042254	0.000735486	3.02023	5.34152	14	320	ribosome biogenesis
clr3∆	Sense	Upregulated	MF	GO:0046943	0.000771977	19.6742	0.185002	3	36	carboxylic acid transmembrane transporter activity
clr3∆	Sense	Upregulated	BP	GO:0051716	0.00079535	4.40371	3.31926	10	692	cellular response to stimulus
set1∆ clr3∆	Sense	Upregulated	MF	GO:0005215	0.000808395	2.186	12.7427	25	325	transporter activity
clr3∆	Sense	Upregulated	MF	GO:0005342	0.00083722	19.0919	0.190141	3	37	organic acid transmembrane transporter activity
clr3∆	Sense	Upregulated	BP	GO:0006950	0.000842727	4.36681	3.34325	10	697	response to stress
set1∆ clr3∆	Sense	Downregulated	MF	GO:0004486	0.00086095	117.341	0.0513894	2	3	methylenetetrahydrofolate dehydrogenase [NAD(P)+] activity
set1∆ clr3∆	Sense	Downregulated	MF	GO:0016842	0.00086095	117.341	0.0513894	2	3	amidine-lyase activity
set1∆ clr3∆	Sense	Upregulated	CC	GO:0005886	0.00099958	2.56849	7.36274	17	188	plasma membrane
set1∆ clr3∆	Sense	Upregulated	BP	GO:0006012	0.00102187	25.4264	0.230238	3	6	galactose metabolic process
clr3∆	Sense	Downregulated	CC	GO:0010339	0.00104492	52.8182	0.0494297	2	20	external side of cell wall
set1∆ clr3∆	Sense	Downregulated	BP	GO:0006555	0.00109216	10.243	0.467383	4	28	methionine metabolic process
set1∆ clr3∆	Sense	Upregulated	MF	GO:0030246	0.00109293	6.0276	1.21545	6	31	carbohydrate binding
set1∆ clr3∆	Sense	Downregulated	MF	GO:0003824	0.00112947	1.96167	33.386	48	1949	catalytic activity
set1∆ clr3∆	Sense	Downregulated	BP	GO:0006725	0.00117618	5.67789	1.20184	6	72	cellular aromatic compound metabolic process
set1∆ clr3∆	Sense	Downregulated	BP	GO:0044271	0.00127548	3.80082	2.67076	9	160	cellular nitrogen compound biosynthetic process
clr3∆	Sense	Upregulated	MF	GO:0005275	0.00130271	16.2094	0.220974	3	43	amine transmembrane transporter activity
set1F_H3K4me- clr3∆	Sense	Upregulated	MF	GO:0010181	0.0013453	45.7982	0.0559574	2	14	FMN binding
clr3∆	Sense	Downregulated	BP	GO:0007155	0.00141084	44.8312	0.0573676	2	23	cell adhesion
clr3∆	Sense	Downregulated	BP	GO:0022610	0.00141084	44.8312	0.0573676	2	23	biological adhesion
clr3∆	Sense	Upregulated	BP	GO:0070887	0.00147119	9.4958	0.508442	4	106	cellular response to chemical stimulus
clr3∆	Sense	Downregulated	CC	GO:0044462	0.00150944	43.1818	0.0593156	2	24	external encapsulating structure part
clr3∆	Sense	Downregulated	CC	GO:0044426	0.00150944	43.1818	0.0593156	2	24	cell wall part
set1∆ clr3∆	Sense	Upregulated	BP	GO:0006091	0.0015211	2.85845	5.06523	13	132	generation of precursor metabolites and energy
set1∆ clr3∆	Sense	Upregulated	MF	GO:0004371	0.00153011	Inf	0.0784164	2	2	glycerone kinase activity
set1∆ clr3∆	Sense	Upregulated	MF	GO:0016206	0.00153011	Inf	0.0784164	2	2	catechol O-methyltransferase activity
set1∆ clr3∆	Sense	Downregulated	CC	GO:0005736	0.00153833	16.1724	0.239544	3	14	DownregulatedA-directed RNA polymerase I complex
set1F_H3K4me-	Sense	Upregulated	MF	GO:0015171	0.00156887	43.45	0.060906	2	32	amino acid transmembrane transporter activity
set1∆ clr3∆	Sense	Downregulated	BP	GO:0006527	0.00161715	60.2706	0.066769	2	4	arginine catabolic process
clr3∆	Sense	Upregulated	BP	GO:0050896	0.00167302	3.944	3.64543	10	760	response to stimulus
set1∆ clr3∆	Sense	Upregulated	MF	GO:0010181	0.0016853	9.97624	0.548915	4	14	FMN binding
set1F_H3K4me- clr3∆	Sense	Downregulated	CC	GO:0030874	0.00171038	1313.75	0.00171103	1	3	nucleolar chromatin
set1F_H3K4me- clr3∆	Sense	Downregulated	MF	GO:0034739	0.00171233	1312.25	0.00171298	1	3	histone deacetylase activity (H4-K16 specific)
set1F_H3K4me- clr3∆	Sense	Downregulated	MF	GO:0032041	0.00171233	1312.25	0.00171298	1	3	NAD-dependent histone deacetylase activity (H3-K14 specific)
set1F_H3K4me- clr3∆	Sense	Downregulated	MF	GO:0031078	0.00171233	1312.25	0.00171298	1	3	histone deacetylase activity (H3-K14 specific)
set1F_H3K4me- clr3∆	Sense	Downregulated	MF	GO:0016634	0.00171233	1312.25	0.00171298	1	3	oxidoreductase activity, acting on the CH-CH groUpregulated of donors, oxygen as acceptor
set1F_H3K4me- clr3∆	Sense	Downregulated	BP	GO:0016584	0.00172612	1301.75	0.00172678	1	3	nucleosome positioning
set1∆ clr3∆	Sense	Upregulated	MF	GO:0003824	0.00175092	1.53572	76.4168	97	1949	catalytic activity
set1F_H3K4me- clr3∆	Sense	Upregulated	MF	GO:0048029	0.0017655	39.2406	0.0639513	2	16	monosaccharide binding
clr3∆	Sense	Downregulated	CC	GO:0009986	0.00180818	15.441	0.254563	3	103	cell surface
set1∆ clr3∆	Sense	Upregulated	MF	GO:0004022	0.00184981	18.6355	0.274458	3	7	alcohol dehydrogenase (NAD) activity
clr3∆	Sense	Upregulated	BP	GO:0043436	0.00195888	5.49272	1.38143	6	288	oxoacid metabolic process
clr3∆	Sense	Upregulated	BP	GO:0019752	0.00195888	5.49272	1.38143	6	288	carboxylic acid metabolic process
clr3∆	Sense	Upregulated	BP	GO:0006082	0.00195888	5.49272	1.38143	6	288	organic acid metabolic process
set1F_H3K4me-	Sense	Upregulated	MF	GO:0046943	0.00198463	38.3088	0.0685192	2	36	carboxylic acid transmembrane transporter activity
set1F_H3K4me- clr3∆	Sense	Upregulated	MF	GO:0004857	0.00199608	36.6175	0.0679482	2	17	enzyme inhibitor activity
set1∆ clr3∆	Sense	Upregulated	BP	GO:0051037	0.00205803	9.27829	0.575595	4	15	regulation of transcription during meiosis
set1F_H3K4me-	Sense	Upregulated	MF	GO:0005342	0.00209591	37.2071	0.0704225	2	37	organic acid transmembrane transporter activity
set1∆ clr3∆	Sense	Downregulated	BP	GO:0022613	0.00211872	2.67375	5.95913	14	357	ribonucleoprotein complex biogenesis
set1∆ clr3∆	Sense	Upregulated	BP	GO:0046164	0.00213052	4.39745	1.8419	7	48	alcohol catabolic process
set1∆ clr3∆	Sense	Downregulated	BP	GO:0006525	0.00215001	14.044	0.267076	3	16	arginine metabolic process
set1F_H3K4me- clr3∆	Sense	Downregulated	CC	GO:0016581	0.00228007	875.667	0.00228137	1	4	NuRD complex
set1F_H3K4me- clr3∆	Sense	Downregulated	CC	GO:0017053	0.00228007	875.667	0.00228137	1	4	transcriptional repressor complex
set1F_H3K4me- clr3∆	Sense	Downregulated	MF	GO:0032129	0.00228267	874.667	0.00228397	1	4	histone deacetylase activity (H3-K9 specific)
set1F_H3K4me- clr3∆	Sense	Downregulated	MF	GO:0046969	0.00228267	874.667	0.00228397	1	4	NAD-dependent histone deacetylase activity (H3-K9 specific)
set1F_H3K4me- clr3∆	Sense	Downregulated	MF	GO:0046970	0.00228267	874.667	0.00228397	1	4	NAD-dependent histone deacetylase activity (H4-K16 specific)
set1∆ clr3∆	Sense	Downregulated	CC	GO:0044452	0.00232586	6.02353	0.941065	5	55	nucleolar part
clr3∆	Sense	Upregulated	BP	GO:0042180	0.00241279	5.25564	1.43899	6	300	cellular ketone metabolic process
set1∆ clr3∆	Sense	Downregulated	CC	GO:0031981	0.00244194	2.24798	10.3175	20	603	nuclear lumen
clr3∆	Sense	Downregulated	MF	GO:0030248	0.00247431	Inf	0.00247431	1	1	cellulose binding
clr3∆	Sense	Downregulated	MF	GO:0004352	0.00247431	Inf	0.00247431	1	1	glutamate dehydrogenase (NAD+) activity
clr3∆	Sense	Downregulated	BP	GO:0019551	0.00249424	Inf	0.00249424	1	1	glutamate catabolic process to 2-oxoglutarate
set1∆ clr3∆	Sense	Downregulated	CC	GO:0005634	0.00250288	1.89002	45.3935	59	2653	nucleus
set1∆ clr3∆	Sense	Downregulated	BP	GO:0000096	0.00255552	7.91916	0.584229	4	35	sulfur amino acid metabolic process
set1∆ clr3∆	Sense	Upregulated	BP	GO:0005975	0.0025996	2.21274	9.43975	19	246	carbohydrate metabolic process
set1F_H3K4me-	Sense	Upregulated	MF	GO:0005275	0.00282447	31.7256	0.0818424	2	43	amine transmembrane transporter activity
set1F_H3K4me- clr3∆	Sense	Downregulated	CC	GO:0033553	0.00284954	656.625	0.00285171	1	5	rDownregulatedA heterochromatin
set1∆ clr3∆	Sense	Upregulated	MF	GO:0004601	0.00287453	14.9054	0.313666	3	8	peroxidase activity
set1∆ clr3∆	Sense	Upregulated	MF	GO:0016684	0.00287453	14.9054	0.313666	3	8	oxidoreductase activity, acting on peroxide as acceptor
set1∆ clr3∆	Sense	Upregulated	MF	GO:0008171	0.00287453	14.9054	0.313666	3	8	O-methyltransferase activity
clr3∆	Sense	Upregulated	BP	GO:0006096	0.00287471	29.9826	0.0815426	2	17	glycolysis
set1∆ clr3∆	Sense	Upregulated	MF	GO:0048029	0.00288077	8.31023	0.627332	4	16	monosaccharide binding
set1∆ clr3∆	Sense	Downregulated	BP	GO:0006144	0.00305824	12.1667	0.30046	3	18	purine nucleobase metabolic process
set1∆ clr3∆	Sense	Downregulated	BP	GO:0046112	0.00305824	12.1667	0.30046	3	18	nucleobase biosynthetic process
set1∆ clr3∆	Sense	Downregulated	BP	GO:0009112	0.00314282	7.43629	0.617613	4	37	nucleobase metabolic process
set1∆ clr3∆	Sense	Downregulated	MF	GO:0016763	0.00329252	11.8368	0.308337	3	18	transferase activity, transferring pentosyl groUpregulateds
set1∆ clr3∆	Sense	Upregulated	MF	GO:0022891	0.00334806	2.26266	8.23373	17	210	substrate-specific transmembrane transporter activity
clr3∆	Sense	Upregulated	BP	GO:0034599	0.00334957	11.459	0.306984	3	64	cellular response to oxidative stress
set1F_H3K4me- clr3∆	Sense	Downregulated	MF	GO:0034979	0.0034227	524.6	0.00342596	1	6	NAD-dependent protein deacetylase activity
set1F_H3K4me- clr3∆	Sense	Downregulated	MF	GO:0017136	0.0034227	524.6	0.00342596	1	6	NAD-dependent histone deacetylase activity
set1F_H3K4me- clr3∆	Sense	Downregulated	MF	GO:0004407	0.0034227	524.6	0.00342596	1	6	histone deacetylase activity
set1F_H3K4me- clr3∆	Sense	Downregulated	MF	GO:0033558	0.0034227	524.6	0.00342596	1	6	protein deacetylase activity
set1∆ clr3∆	Sense	Downregulated	BP	GO:0006364	0.00358851	3.22555	3.10476	9	186	rRNA processing
clr3∆	Sense	Upregulated	BP	GO:0006979	0.00365569	11.0909	0.316577	3	66	response to oxidative stress
set1∆ clr3∆	Sense	Upregulated	BP	GO:0016054	0.00381896	4.5282	1.53492	6	40	organic acid catabolic process
set1∆ clr3∆	Sense	Upregulated	BP	GO:0046395	0.00381896	4.5282	1.53492	6	40	carboxylic acid catabolic process
set1∆ clr3∆	Sense	Downregulated	BP	GO:0016072	0.00385342	3.18823	3.13814	9	188	rRNA metabolic process
set1∆ clr3∆	Sense	Downregulated	BP	GO:0046655	0.00395568	30.1235	0.100153	2	6	folic acid metabolic process
set1∆ clr3∆	Sense	Downregulated	BP	GO:0046656	0.00395568	30.1235	0.100153	2	6	folic acid biosynthetic process
set1F_H3K4me- clr3∆	Sense	Upregulated	MF	GO:0050040	0.00399695	Inf	0.00399695	1	1	lactate 2-monooxygenase activity
set1F_H3K4me- clr3∆	Sense	Upregulated	MF	GO:0004460	0.00399695	Inf	0.00399695	1	1	L-lactate dehydrogenase (cytochrome) activity
set1F_H3K4me- clr3∆	Sense	Upregulated	MF	GO:0004459	0.00399695	Inf	0.00399695	1	1	L-lactate dehydrogenase activity
set1F_H3K4me- clr3∆	Sense	Upregulated	MF	GO:0016703	0.00399695	Inf	0.00399695	1	1	oxidoreductase activity, acting on single donors with incorporation of molecular oxygen, incorporation of one atom of oxygen (internal monooxygenases or internal mixed function oxidases)
set1∆ clr3∆	Sense	Downregulated	MF	GO:0016840	0.00416246	29.3182	0.102779	2	6	carbon-nitrogen lyase activity
set1∆ clr3∆	Sense	Upregulated	CC	GO:0005782	0.00446141	49.5392	0.11749	2	3	peroxisomal matrix
set1∆ clr3∆	Sense	Upregulated	CC	GO:0034064	0.00446141	49.5392	0.11749	2	3	Tor2-Mei2-Ste11 complex
set1∆ clr3∆	Sense	Upregulated	CC	GO:0031907	0.00446141	49.5392	0.11749	2	3	microbody lumen
set1∆ clr3∆	Sense	Upregulated	MF	GO:0004345	0.00447147	49.4804	0.117625	2	3	glucose-6-phosphate dehydrogenase activity
set1∆ clr3∆	Sense	Upregulated	MF	GO:0004457	0.00447147	49.4804	0.117625	2	3	lactate dehydrogenase activity
set1F_H3K4me- clr3∆	Sense	Downregulated	MF	GO:0019213	0.00456186	374.571	0.00456795	1	8	deacetylase activity
set1∆ clr3∆	Sense	Upregulated	BP	GO:0006766	0.0045728	3.38183	2.64774	8	69	vitamin metabolic process
set1∆ clr3∆	Sense	Upregulated	BP	GO:0006767	0.0045728	3.38183	2.64774	8	69	water-soluble vitamin metabolic process
clr3∆	Sense	Upregulated	BP	GO:0015886	0.00479662	Inf	0.00479662	1	1	heme transport
clr3∆	Sense	Upregulated	BP	GO:0070297	0.00479662	Inf	0.00479662	1	1	regulation of two-component signal transduction system (phosphorelay)
set1∆ clr3∆	Sense	Downregulated	BP	GO:0051188	0.00482196	4.19143	1.58576	6	95	cofactor biosynthetic process
clr3∆	Sense	Downregulated	CC	GO:0005951	0.00493733	437.167	0.00494297	1	2	carbamoyl-phosphate synthase complex
clr3∆	Sense	Downregulated	MF	GO:0030247	0.00494296	436.667	0.00494861	1	2	polysaccharide binding
clr3∆	Sense	Downregulated	MF	GO:0001871	0.00494296	436.667	0.00494861	1	2	pattern binding
set1F_H3K4me- clr3∆	Sense	Upregulated	BP	GO:0032787	0.00503187	10.0039	0.356869	3	93	monocarboxylic acid metabolic process
set1F_H3K4me- clr3∆	Sense	Downregulated	MF	GO:0003688	0.00513112	327.688	0.00513894	1	9	DownregulatedA replication origin binding
clr3∆	Sense	Upregulated	MF	GO:0050040	0.00513894	Inf	0.00513894	1	1	lactate 2-monooxygenase activity
clr3∆	Sense	Upregulated	MF	GO:0004365	0.00513894	Inf	0.00513894	1	1	glyceraldehyde-3-phosphate dehydrogenase (NAD+) (phosphorylating) activity
clr3∆	Sense	Upregulated	MF	GO:0004460	0.00513894	Inf	0.00513894	1	1	L-lactate dehydrogenase (cytochrome) activity
clr3∆	Sense	Upregulated	MF	GO:0004459	0.00513894	Inf	0.00513894	1	1	L-lactate dehydrogenase activity
clr3∆	Sense	Upregulated	MF	GO:0016703	0.00513894	Inf	0.00513894	1	1	oxidoreductase activity, acting on single donors with incorporation of molecular oxygen, incorporation of one atom of oxygen (internal monooxygenases or internal mixed function oxidases)
set1F_H3K4me- clr3∆	Sense	Downregulated	BP	GO:0000183	0.0051724	325.062	0.00518035	1	9	chromatin silencing at rDownregulatedA
set1∆ clr3∆	Sense	Upregulated	CC	GO:0005576	0.0055718	6.65215	0.744106	4	19	extracellular region
set1∆ clr3∆	Sense	Downregulated	BP	GO:0034641	0.00590354	2.78936	3.97276	10	238	cellular nitrogen compound metabolic process
set1∆ clr3∆	Sense	Upregulated	BP	GO:0044275	0.00595645	4.91716	1.18956	5	31	cellular carbohydrate catabolic process
clr3∆	Sense	Upregulated	BP	GO:0042221	0.00597969	6.30952	0.748273	4	156	response to chemical stimulus
set1∆ clr3∆	Sense	Upregulated	MF	GO:0005275	0.00612148	4.06297	1.68595	6	43	amine transmembrane transporter activity
set1∆ clr3∆	Sense	Downregulated	MF	GO:0008757	0.00626128	4.6875	1.18196	5	69	S-adenosylmethionine-dependent methyltransferase activity
clr3∆	Sense	Downregulated	BP	GO:0009064	0.00632234	19.9304	0.122218	2	49	glutamine family amino acid metabolic process
set1F_H3K4me- clr3∆	Sense	Upregulated	MF	GO:0030246	0.00659876	18.8893	0.123906	2	31	carbohydrate binding
set1∆ clr3∆	Sense	Downregulated	MF	GO:0008168	0.00668818	3.89478	1.69585	6	99	methyltransferase activity
set1∆ clr3∆	Sense	Upregulated	CC	GO:0044459	0.00669711	2.72164	4.03384	10	103	plasma membrane part
set1∆ clr3∆	Sense	Downregulated	MF	GO:0008276	0.00671791	8.86897	0.393986	3	23	protein methyltransferase activity
set1∆ clr3∆	Sense	Downregulated	BP	GO:0009113	0.00722507	20.0745	0.133538	2	8	purine nucleobase biosynthetic process
set1F_H3K4me- clr3∆	Sense	Upregulated	BP	GO:0070887	0.00724659	8.71902	0.406754	3	106	cellular response to chemical stimulus
set1∆ clr3∆	Sense	Upregulated	BP	GO:0016137	0.00731043	9.52538	0.422103	3	11	glycoside metabolic process
set1∆ clr3∆	Sense	Downregulated	MF	GO:0016741	0.00736161	3.81128	1.73011	6	101	transferase activity, transferring one-carbon groUpregulateds
clr3∆	Sense	Downregulated	CC	GO:0030874	0.00739754	218.542	0.00741445	1	3	nucleolar chromatin
clr3∆	Sense	Downregulated	MF	GO:0004088	0.00740597	218.292	0.00742292	1	3	carbamoyl-phosphate synthase (glutamine-hydrolyzing) activity
clr3∆	Sense	Downregulated	MF	GO:0034739	0.00740597	218.292	0.00742292	1	3	histone deacetylase activity (H4-K16 specific)
clr3∆	Sense	Downregulated	MF	GO:0032041	0.00740597	218.292	0.00742292	1	3	NAD-dependent histone deacetylase activity (H3-K14 specific)
clr3∆	Sense	Downregulated	MF	GO:0031078	0.00740597	218.292	0.00742292	1	3	histone deacetylase activity (H3-K14 specific)
clr3∆	Sense	Downregulated	MF	GO:0016639	0.00740597	218.292	0.00742292	1	3	oxidoreductase activity, acting on the CH-NH2 groUpregulated of donors, NAD or NADP as acceptor
clr3∆	Sense	Downregulated	BP	GO:0006106	0.00746551	216.542	0.00748273	1	3	fumarate metabolic process
clr3∆	Sense	Downregulated	BP	GO:0016584	0.00746551	216.542	0.00748273	1	3	nucleosome positioning
set1∆ clr3∆	Sense	Downregulated	BP	GO:0009116	0.00748053	5.69571	0.784536	4	47	nucleoside metabolic process
set1∆ clr3∆	Sense	Downregulated	BP	GO:0018130	0.00748053	5.69571	0.784536	4	47	heterocycle biosynthetic process
set1∆ clr3∆	Sense	Upregulated	MF	GO:0015171	0.00748883	4.62594	1.25466	5	32	amino acid transmembrane transporter activity
set1∆ clr3∆	Sense	Downregulated	MF	GO:0018024	0.00759829	19.5379	0.137038	2	8	histone-lysine N-methyltransferase activity
set1∆ clr3∆	Sense	Downregulated	MF	GO:0042054	0.00759829	19.5379	0.137038	2	8	histone methyltransferase activity
set1F_H3K4me- clr3∆	Sense	Upregulated	BP	GO:0042759	0.00766061	273.211	0.0076746	1	2	long-chain fatty acid biosynthetic process
clr3∆	Sense	Downregulated	CC	GO:0044452	0.00777796	17.8182	0.135932	2	55	nucleolar part
set1∆ clr3∆	Sense	Upregulated	BP	GO:0044262	0.00786754	2.1641	7.52111	15	196	cellular carbohydrate metabolic process
set1F_H3K4me- clr3∆	Sense	Upregulated	MF	GO:0016206	0.00797869	261.6	0.00799391	1	2	catechol O-methyltransferase activity
set1F_H3K4me- clr3∆	Sense	Upregulated	MF	GO:0016898	0.00797869	261.6	0.00799391	1	2	oxidoreductase activity, acting on the CH-OH groUpregulated of donors, cytochrome as acceptor
set1F_H3K4me- clr3∆	Sense	Downregulated	BP	GO:0006783	0.00803824	199.846	0.00805833	1	14	heme biosynthetic process
set1∆ clr3∆	Sense	Downregulated	BP	GO:0018193	0.00805841	5.56517	0.801228	4	48	peptidyl-amino acid modification
clr3∆	Sense	Upregulated	BP	GO:0006007	0.00828502	16.6184	0.139102	2	29	glucose catabolic process
set1∆ clr3∆	Sense	Upregulated	BP	GO:0019318	0.0082984	3.33007	2.34075	7	61	hexose metabolic process
set1∆ clr3∆	Sense	Upregulated	BP	GO:0016139	0.00835322	25.303	0.153492	2	4	glycoside catabolic process
set1∆ clr3∆	Sense	Upregulated	BP	GO:0033499	0.00835322	25.303	0.153492	2	4	galactose catabolic process via UDP-galactose
clr3∆	Sense	Downregulated	MF	GO:0043565	0.0083544	17.1438	0.141035	2	57	sequence-specific DownregulatedA binding
set1F_H3K4me- clr3∆	Sense	Downregulated	BP	GO:0006779	0.00861074	185.536	0.00863392	1	15	porphyrin-containing compound biosynthetic process
set1F_H3K4me- clr3∆	Sense	Downregulated	BP	GO:0033014	0.00861074	185.536	0.00863392	1	15	tetrapyrrole biosynthetic process
set1∆ clr3∆	Sense	Downregulated	BP	GO:0009064	0.00866491	5.44043	0.81792	4	49	glutamine family amino acid metabolic process
set1∆ clr3∆	Sense	Downregulated	BP	GO:0009066	0.00866491	5.44043	0.81792	4	49	aspartate family amino acid metabolic process
set1∆ clr3∆	Sense	Upregulated	MF	GO:0004024	0.00871211	24.7353	0.156833	2	4	alcohol dehydrogenase activity, zinc-dependent
set1∆ clr3∆	Sense	Upregulated	MF	GO:0004602	0.00871211	24.7353	0.156833	2	4	glutathione peroxidase activity
set1∆ clr3∆	Sense	Upregulated	MF	GO:0015663	0.00871211	24.7353	0.156833	2	4	nicotinamide mononucleotide transmembrane transporter activity
set1∆ clr3∆	Sense	Upregulated	MF	GO:0004737	0.00871211	24.7353	0.156833	2	4	pyruvate decarboxylase activity
set1∆ clr3∆	Sense	Upregulated	BP	GO:0019320	0.00888919	4.40584	1.30468	5	34	hexose catabolic process
set1∆ clr3∆	Sense	Upregulated	BP	GO:0006066	0.00892337	2.26892	6.21642	13	162	alcohol metabolic process
set1F_H3K4me- clr3∆	Sense	Downregulated	BP	GO:0042168	0.00918303	173.133	0.00920952	1	16	heme metabolic process
set1∆ clr3∆	Sense	Downregulated	BP	GO:0000050	0.00918909	17.2034	0.15023	2	9	urea cycle
set1∆ clr3∆	Sense	Downregulated	BP	GO:0042558	0.00918909	17.2034	0.15023	2	9	pteridine-containing compound metabolic process
set1∆ clr3∆	Sense	Downregulated	BP	GO:0042559	0.00918909	17.2034	0.15023	2	9	pteridine-containing compound biosynthetic process
clr3∆	Sense	Upregulated	BP	GO:0006090	0.00943359	15.4663	0.148695	2	31	pyruvate metabolic process
set1F_H3K4me-	Sense	Upregulated	CC	GO:0005853	0.00947322	145.722	0.0095057	1	5	eukaryotic translation elongation factor 1 complex
set1∆ clr3∆	Sense	Upregulated	BP	GO:0042125	0.00947485	8.46531	0.460476	3	12	protein galactosylation
set1∆ clr3∆	Sense	Upregulated	BP	GO:0005984	0.00947485	8.46531	0.460476	3	12	disaccharide metabolic process
clr3∆	Sense	Downregulated	CC	GO:0005618	0.00950519	15.9877	0.15076	2	61	cell wall
clr3∆	Sense	Downregulated	CC	GO:0030312	0.00950519	15.9877	0.15076	2	61	external encapsulating structure
clr3∆	Sense	Upregulated	BP	GO:0042759	0.00957115	216.083	0.00959325	1	2	long-chain fatty acid biosynthetic process
clr3∆	Sense	Upregulated	BP	GO:0051181	0.00957115	216.083	0.00959325	1	2	cofactor transport
set1F_H3K4me- clr3∆	Sense	Downregulated	CC	GO:0031933	0.00966635	163.781	0.00969582	1	17	telomeric heterochromatin
set1F_H3K4me- clr3∆	Sense	Downregulated	BP	GO:0006778	0.0097551	162.281	0.00978511	1	17	porphyrin-containing compound metabolic process
set1F_H3K4me- clr3∆	Sense	Downregulated	BP	GO:0033013	0.0097551	162.281	0.00978511	1	17	tetrapyrrole metabolic process
clr3∆	Sense	Downregulated	CC	GO:0016581	0.00985214	145.667	0.00988593	1	4	NuRD complex
clr3∆	Sense	Downregulated	CC	GO:0017053	0.00985214	145.667	0.00988593	1	4	transcriptional repressor complex
clr3∆	Sense	Downregulated	MF	GO:0032129	0.00986335	145.5	0.00989722	1	4	histone deacetylase activity (H3-K9 specific)
clr3∆	Sense	Downregulated	MF	GO:0046969	0.00986335	145.5	0.00989722	1	4	NAD-dependent histone deacetylase activity (H3-K9 specific)
clr3∆	Sense	Downregulated	MF	GO:0046970	0.00986335	145.5	0.00989722	1	4	NAD-dependent histone deacetylase activity (H4-K16 specific)
clr3∆	Sense	Downregulated	BP	GO:0007000	0.00994256	144.333	0.00997698	1	4	nucleolus organization
clr3∆	Sense	Downregulated	BP	GO:0034503	0.00994256	144.333	0.00997698	1	4	protein localization to nucleolar rDownregulatedA repeats
set1F_H3K4me-	Sense	Upregulated	CC	GO:0022625	0.00996194	16.1562	0.155894	2	82	cytosolic large ribosomal subunit
set1F_H3K4me- clr3∆	Sense	Downregulated	CC	GO:0031934	0.010233	154.118	0.0102662	1	18	mating-type region heterochromatin
clr3∆	Sense	Upregulated	CC	GO:0016363	0.0102408	201.231	0.0102662	1	2	nuclear matrix
clr3∆	Sense	Upregulated	CC	GO:0000015	0.0102408	201.231	0.0102662	1	2	phosphopyruvate hydratase complex
clr3∆	Sense	Upregulated	MF	GO:0015193	0.0102524	201	0.0102779	1	2	L-proline transmembrane transporter activity
clr3∆	Sense	Upregulated	MF	GO:0004634	0.0102524	201	0.0102779	1	2	phosphopyruvate hydratase activity
clr3∆	Sense	Upregulated	MF	GO:0016898	0.0102524	201	0.0102779	1	2	oxidoreductase activity, acting on the CH-OH groUpregulated of donors, cytochrome as acceptor
clr3∆	Sense	Upregulated	MF	GO:0003935	0.0102524	201	0.0102779	1	2	GTP cyclohydrolase II activity
clr3∆	Sense	Upregulated	BP	GO:0019320	0.0112817	14.0082	0.163085	2	34	hexose catabolic process
set1∆ clr3∆	Sense	Upregulated	MF	GO:0015926	0.0113077	5.24127	0.901789	4	23	glucosidase activity
set1F_H3K4me- clr3∆	Sense	Upregulated	BP	GO:0052548	0.01147	136.579	0.0115119	1	3	regulation of endopeptidase activity
set1F_H3K4me- clr3∆	Sense	Upregulated	BP	GO:0031990	0.01147	136.579	0.0115119	1	3	mRNA export from nucleus in response to heat stress
set1F_H3K4me- clr3∆	Sense	Upregulated	BP	GO:0010951	0.01147	136.579	0.0115119	1	3	negative regulation of endopeptidase activity
set1∆ clr3∆	Sense	Downregulated	MF	GO:0008170	0.0116853	7.08828	0.479635	3	28	N-methyltransferase activity
clr3∆	Sense	Upregulated	BP	GO:0009408	0.0119305	13.581	0.167882	2	35	response to heat
clr3∆	Sense	Upregulated	BP	GO:0034605	0.0119305	13.581	0.167882	2	35	cellular response to heat
set1F_H3K4me- clr3∆	Sense	Upregulated	CC	GO:0034064	0.0119317	130.925	0.0119772	1	3	Tor2-Mei2-Ste11 complex
set1F_H3K4me- clr3∆	Sense	Upregulated	MF	GO:0004866	0.0119453	130.775	0.0119909	1	3	endopeptidase inhibitor activity
set1F_H3K4me- clr3∆	Sense	Upregulated	MF	GO:0016701	0.0119453	130.775	0.0119909	1	3	oxidoreductase activity, acting on single donors with incorporation of molecular oxygen
set1F_H3K4me- clr3∆	Sense	Downregulated	MF	GO:0016811	0.0119453	130.775	0.0119909	1	21	hydrolase activity, acting on carbon-nitrogen (but not peptide) bonds, in linear amides
set1∆ clr3∆	Sense	Upregulated	BP	GO:0070301	0.0119737	7.61726	0.498849	3	13	cellular response to hydrogen peroxide
set1∆ clr3∆	Sense	Upregulated	BP	GO:0042542	0.0119737	7.61726	0.498849	3	13	response to hydrogen peroxide
set1F_H3K4me- clr3∆	Sense	Downregulated	BP	GO:0006348	0.0120412	129.725	0.0120875	1	21	chromatin silencing at telomere
clr3∆	Sense	Upregulated	MF	GO:0050662	0.0122343	6.9769	0.488199	3	95	coenzyme binding
clr3∆	Sense	Downregulated	CC	GO:0033553	0.0123011	109.229	0.0123574	1	5	rDownregulatedA heterochromatin
set1F_H3K4me- clr3∆	Sense	Downregulated	CC	GO:0044454	0.0123112	28.6531	0.196768	2	345	nuclear chromosome part
set1∆ clr3∆	Sense	Upregulated	MF	GO:0046943	0.0123548	4.02584	1.4115	5	36	carboxylic acid transmembrane transporter activity
clr3∆	Sense	Downregulated	BP	GO:0034502	0.0124139	108.229	0.0124712	1	5	protein localization to chromosome
clr3∆	Sense	Downregulated	BP	GO:0006538	0.0124139	108.229	0.0124712	1	5	glutamate catabolic process
set1F_H3K4me- clr3∆	Sense	Downregulated	CC	GO:0005721	0.0124975	124.667	0.0125475	1	22	centromeric heterochromatin
set1F_H3K4me- clr3∆	Sense	Downregulated	MF	GO:0016627	0.0125117	124.524	0.0125619	1	22	oxidoreductase activity, acting on the CH-CH groUpregulated of donors
set1∆ clr3∆	Sense	Upregulated	MF	GO:0016829	0.0125209	2.79237	3.13666	8	80	lyase activity
clr3∆	Sense	Upregulated	BP	GO:0009266	0.0125954	13.179	0.172678	2	36	response to temperature stimulus
set1F_H3K4me- clr3∆	Sense	Downregulated	BP	GO:0046148	0.0126121	123.524	0.0126631	1	22	pigment biosynthetic process
set1∆ clr3∆	Sense	Upregulated	MF	GO:0051184	0.0126972	7.44532	0.509707	3	13	cofactor transporter activity
set1∆ clr3∆	Sense	Upregulated	MF	GO:0004252	0.0126972	7.44532	0.509707	3	13	serine-type endopeptidase activity
set1∆ clr3∆	Sense	Downregulated	BP	GO:0009119	0.0131764	6.74339	0.500767	3	30	ribonucleoside metabolic process
set1∆ clr3∆	Sense	Upregulated	BP	GO:0010673	0.0135715	16.8653	0.191865	2	5	positive regulation of transcription from RNA polymerase II promoter during meiosis
set1∆ clr3∆	Sense	Upregulated	BP	GO:0046352	0.0135715	16.8653	0.191865	2	5	disaccharide catabolic process
set1∆ clr3∆	Sense	Upregulated	BP	GO:0019388	0.0135715	16.8653	0.191865	2	5	galactose catabolic process
set1∆ clr3∆	Sense	Upregulated	BP	GO:0046174	0.0135715	16.8653	0.191865	2	5	polyol catabolic process
set1∆ clr3∆	Sense	Upregulated	BP	GO:0019405	0.0135715	16.8653	0.191865	2	5	alditol catabolic process
set1∆ clr3∆	Sense	Upregulated	BP	GO:0008614	0.0135715	16.8653	0.191865	2	5	pyridoxine metabolic process
set1∆ clr3∆	Sense	Upregulated	BP	GO:0008615	0.0135715	16.8653	0.191865	2	5	pyridoxine biosynthetic process
set1F_H3K4me- clr3∆	Sense	Downregulated	CC	GO:0000228	0.0136721	27.0442	0.207605	2	364	nuclear chromosome
set1F_H3K4me-	Sense	Upregulated	BP	GO:0006541	0.0137402	92.7857	0.0138143	1	8	glutamine metabolic process
set1F_H3K4me- clr3∆	Sense	Downregulated	BP	GO:0042440	0.0137534	112.739	0.0138143	1	24	pigment metabolic process
set1∆ clr3∆	Sense	Upregulated	MF	GO:0005342	0.0138419	3.89925	1.4507	5	37	organic acid transmembrane transporter activity
set1∆ clr3∆	Sense	Downregulated	CC	GO:0000428	0.0140877	6.56833	0.513308	3	30	DownregulatedA-directed RNA polymerase complex
set1∆ clr3∆	Sense	Downregulated	CC	GO:0055029	0.0140877	6.56833	0.513308	3	30	nuclear DownregulatedA-directed RNA polymerase complex
set1∆ clr3∆	Sense	Upregulated	MF	GO:0022892	0.0142676	1.87699	10.3118	18	263	substrate-specific transporter activity
clr3∆	Sense	Upregulated	BP	GO:0031990	0.0143237	108.021	0.0143899	1	3	mRNA export from nucleus in response to heat stress
clr3∆	Sense	Upregulated	BP	GO:0070302	0.0143237	108.021	0.0143899	1	3	regulation of stress-activated protein kinase signaling cascade
set1∆ clr3∆	Sense	Downregulated	MF	GO:0016646	0.014435	13.0177	0.188428	2	11	oxidoreductase activity, acting on the CH-NH groUpregulated of donors, NAD or NADP as acceptor
set1F_H3K4me- clr3∆	Sense	Downregulated	CC	GO:0000118	0.0147585	104.64	0.0148289	1	26	histone deacetylase complex
clr3∆	Sense	Downregulated	MF	GO:0034979	0.0147613	87.2667	0.0148458	1	6	NAD-dependent protein deacetylase activity
clr3∆	Sense	Downregulated	MF	GO:0017136	0.0147613	87.2667	0.0148458	1	6	NAD-dependent histone deacetylase activity
clr3∆	Sense	Downregulated	MF	GO:0004407	0.0147613	87.2667	0.0148458	1	6	histone deacetylase activity
clr3∆	Sense	Downregulated	MF	GO:0033558	0.0147613	87.2667	0.0148458	1	6	protein deacetylase activity
clr3∆	Sense	Downregulated	MF	GO:0019237	0.0147613	87.2667	0.0148458	1	6	centromeric DownregulatedA binding
set1∆ clr3∆	Sense	Upregulated	BP	GO:0009313	0.0148151	6.9234	0.537222	3	14	oligosaccharide catabolic process
clr3∆	Sense	Downregulated	BP	GO:0006103	0.0148795	86.5667	0.0149655	1	6	2-oxoglutarate metabolic process
set1F_H3K4me- clr3∆	Sense	Downregulated	BP	GO:0006476	0.0148938	103.68	0.0149655	1	26	protein deacetylation
set1F_H3K4me- clr3∆	Sense	Downregulated	BP	GO:0016575	0.0148938	103.68	0.0149655	1	26	histone deacetylation
set1F_H3K4me- clr3∆	Sense	Upregulated	BP	GO:0001676	0.0152654	91.0351	0.0153492	1	4	long-chain fatty acid metabolic process
set1F_H3K4me- clr3∆	Sense	Upregulated	BP	GO:0052547	0.0152654	91.0351	0.0153492	1	4	regulation of peptidase activity
set1F_H3K4me- clr3∆	Sense	Upregulated	BP	GO:0045836	0.0152654	91.0351	0.0153492	1	4	positive regulation of meiosis
set1F_H3K4me- clr3∆	Sense	Upregulated	BP	GO:0010466	0.0152654	91.0351	0.0153492	1	4	negative regulation of peptidase activity
set1F_H3K4me- clr3∆	Sense	Upregulated	BP	GO:0000722	0.0152654	91.0351	0.0153492	1	4	telomere maintenance via recombination
clr3∆	Sense	Upregulated	MF	GO:0016701	0.0153406	100.481	0.0154168	1	3	oxidoreductase activity, acting on single donors with incorporation of molecular oxygen
clr3∆	Sense	Upregulated	MF	GO:0003933	0.0153406	100.481	0.0154168	1	3	GTP cyclohydrolase activity
set1F_H3K4me- clr3∆	Sense	Downregulated	BP	GO:0031060	0.0154636	99.6731	0.0155411	1	27	regulation of histone methylation
set1∆ clr3∆	Sense	Upregulated	BP	GO:0042364	0.0157644	3.75415	1.49655	5	39	water-soluble vitamin biosynthetic process
set1∆ clr3∆	Sense	Upregulated	BP	GO:0009110	0.0157644	3.75415	1.49655	5	39	vitamin biosynthetic process
set1F_H3K4me- clr3∆	Sense	Upregulated	CC	GO:0033620	0.0158787	87.2667	0.0159696	1	4	Mei2 nuclear dot
set1F_H3K4me- clr3∆	Sense	Upregulated	CC	GO:0016604	0.0158787	87.2667	0.0159696	1	4	nuclear body
set1F_H3K4me- clr3∆	Sense	Upregulated	MF	GO:0030414	0.0158967	87.1667	0.0159878	1	4	peptidase inhibitor activity
set1∆ clr3∆	Sense	Downregulated	BP	GO:0006591	0.0163083	12.0353	0.200307	2	12	ornithine metabolic process
set1∆ clr3∆	Sense	Downregulated	BP	GO:0043604	0.0163083	12.0353	0.200307	2	12	amide biosynthetic process
set1∆ clr3∆	Sense	Downregulated	BP	GO:0043096	0.0166922	Inf	0.0166922	1	1	purine nucleobase salvage
set1∆ clr3∆	Sense	Downregulated	BP	GO:0006168	0.0166922	Inf	0.0166922	1	1	adenine salvage
set1∆ clr3∆	Sense	Downregulated	BP	GO:0015746	0.0166922	Inf	0.0166922	1	1	citrate transport
set1∆ clr3∆	Sense	Downregulated	BP	GO:0006842	0.0166922	Inf	0.0166922	1	1	tricarboxylic acid transport
set1∆ clr3∆	Sense	Downregulated	BP	GO:0006843	0.0166922	Inf	0.0166922	1	1	mitochondrial citrate transport
set1∆ clr3∆	Sense	Downregulated	BP	GO:0018322	0.0166922	Inf	0.0166922	1	1	protein tyrosinylation
set1∆ clr3∆	Sense	Downregulated	BP	GO:0018166	0.0166922	Inf	0.0166922	1	1	C-terminal protein-tyrosinylation
set1∆ clr3∆	Sense	Downregulated	BP	GO:0060904	0.0166922	Inf	0.0166922	1	1	regulation of protein folding in endoplasmic reticulum
clr3∆	Sense	Upregulated	BP	GO:0046365	0.0169145	11.1891	0.201458	2	42	monosaccharide catabolic process
set1∆ clr3∆	Sense	Downregulated	BP	GO:0006360	0.0170846	6.06548	0.550844	3	33	transcription from RNA polymerase I promoter
set1∆ clr3∆	Sense	Downregulated	CC	GO:0030685	0.0171103	Inf	0.0171103	1	1	nucleolar preribosome
set1∆ clr3∆	Sense	Downregulated	MF	GO:0016312	0.0171298	Inf	0.0171298	1	1	inositol bisphosphate phosphatase activity
set1∆ clr3∆	Sense	Downregulated	MF	GO:0004835	0.0171298	Inf	0.0171298	1	1	tubulin-tyrosine ligase activity
set1∆ clr3∆	Sense	Downregulated	MF	GO:0004018	0.0171298	Inf	0.0171298	1	1	N6-(1,2-dicarboxyethyl)AMP AMP-lyase (fumarate-forming) activity
set1∆ clr3∆	Sense	Downregulated	MF	GO:0003883	0.0171298	Inf	0.0171298	1	1	CTP synthase activity
set1∆ clr3∆	Sense	Downregulated	MF	GO:0046523	0.0171298	Inf	0.0171298	1	1	S-methyl-5-thioribose-1-phosphate isomerase activity
set1∆ clr3∆	Sense	Downregulated	MF	GO:0004587	0.0171298	Inf	0.0171298	1	1	ornithine-oxo-acid transaminase activity
set1∆ clr3∆	Sense	Downregulated	MF	GO:0004655	0.0171298	Inf	0.0171298	1	1	porphobilinogen synthase activity
set1∆ clr3∆	Sense	Downregulated	MF	GO:0032131	0.0171298	Inf	0.0171298	1	1	alkylated DownregulatedA binding
set1∆ clr3∆	Sense	Downregulated	MF	GO:0032132	0.0171298	Inf	0.0171298	1	1	O6-alkylguanine-DownregulatedA binding
set1∆ clr3∆	Sense	Downregulated	MF	GO:0004647	0.0171298	Inf	0.0171298	1	1	phosphoserine phosphatase activity
set1∆ clr3∆	Sense	Downregulated	MF	GO:0032791	0.0171298	Inf	0.0171298	1	1	lead ion binding
set1∆ clr3∆	Sense	Downregulated	MF	GO:0004452	0.0171298	Inf	0.0171298	1	1	isopentenyl-diphosphate delta-isomerase activity
set1∆ clr3∆	Sense	Downregulated	MF	GO:0004458	0.0171298	Inf	0.0171298	1	1	D-lactate dehydrogenase (cytochrome) activity
set1∆ clr3∆	Sense	Downregulated	MF	GO:0004487	0.0171298	Inf	0.0171298	1	1	methylenetetrahydrofolate dehydrogenase (NAD+) activity
set1∆ clr3∆	Sense	Downregulated	MF	GO:0070818	0.0171298	Inf	0.0171298	1	1	protoporphyrinogen oxidase activity
set1∆ clr3∆	Sense	Downregulated	MF	GO:0004441	0.0171298	Inf	0.0171298	1	1	inositol-1,4-bisphosphate 1-phosphatase activity
set1∆ clr3∆	Sense	Downregulated	MF	GO:0017061	0.0171298	Inf	0.0171298	1	1	S-methyl-5-thioadenosine phosphorylase activity
set1∆ clr3∆	Sense	Downregulated	MF	GO:0003999	0.0171298	Inf	0.0171298	1	1	adenine phosphoribosyltransferase activity
set1∆ clr3∆	Sense	Downregulated	MF	GO:0003908	0.0171298	Inf	0.0171298	1	1	methylated-DownregulatedA-[protein]-cysteine S-methyltransferase activity
set1∆ clr3∆	Sense	Downregulated	MF	GO:0042800	0.0171298	Inf	0.0171298	1	1	histone methyltransferase activity (H3-K4 specific)
set1∆ clr3∆	Sense	Downregulated	MF	GO:0070626	0.0171298	Inf	0.0171298	1	1	(S)-2-(5-amino-1-(5-phospho-D-ribosyl)imidazole-4-carboxamido)succinate AMP-lyase (fumarate-forming) activity
set1∆ clr3∆	Sense	Downregulated	MF	GO:0008441	0.0171298	Inf	0.0171298	1	1	3'(2'),5'-bisphosphate nucleotidase activity
set1∆ clr3∆	Sense	Downregulated	MF	GO:0016695	0.0171298	Inf	0.0171298	1	1	oxidoreductase activity, acting on hydrogen as donor
set1∆ clr3∆	Sense	Downregulated	MF	GO:0016699	0.0171298	Inf	0.0171298	1	1	oxidoreductase activity, acting on hydrogen as donor, iron-sulfur protein as acceptor
set1∆ clr3∆	Sense	Downregulated	MF	GO:0008901	0.0171298	Inf	0.0171298	1	1	ferredoxin hydrogenase activity
set1∆ clr3∆	Sense	Downregulated	MF	GO:0004729	0.0171298	Inf	0.0171298	1	1	oxygen-dependent protoporphyrinogen oxidase activity
set1∆ clr3∆	Sense	Downregulated	CC	GO:0070013	0.0178788	1.79642	13.1749	21	770	intracellular organelle lumen
set1∆ clr3∆	Sense	Downregulated	CC	GO:0043233	0.0178788	1.79642	13.1749	21	770	organelle lumen
set1∆ clr3∆	Sense	Upregulated	BP	GO:0006740	0.0180043	6.34518	0.575595	3	15	NADPH regeneration
set1∆ clr3∆	Sense	Downregulated	CC	GO:0030880	0.0182494	5.90805	0.564639	3	33	RNA polymerase complex
set1F_H3K4me- clr3∆	Sense	Downregulated	CC	GO:0044427	0.0184101	22.9147	0.241825	2	424	chromosomal part
set1∆ clr3∆	Sense	Downregulated	BP	GO:0032787	0.0190168	3.49016	1.55238	5	93	monocarboxylic acid metabolic process
set1F_H3K4me- clr3∆	Sense	Upregulated	BP	GO:0045936	0.0190471	68.2632	0.0191865	1	5	negative regulation of phosphate metabolic process
set1F_H3K4me- clr3∆	Sense	Upregulated	BP	GO:0042326	0.0190471	68.2632	0.0191865	1	5	negative regulation of phosphorylation
set1F_H3K4me- clr3∆	Sense	Upregulated	BP	GO:0010563	0.0190471	68.2632	0.0191865	1	5	negative regulation of phosphorus metabolic process
clr3∆	Sense	Upregulated	BP	GO:0001676	0.0190543	72	0.0191865	1	4	long-chain fatty acid metabolic process
clr3∆	Sense	Upregulated	BP	GO:0000722	0.0190543	72	0.0191865	1	4	telomere maintenance via recombination
set1∆ clr3∆	Sense	Downregulated	BP	GO:0018022	0.0190664	10.939	0.216999	2	13	peptidyl-lysine methylation
set1F_H3K4me- clr3∆	Sense	Downregulated	BP	GO:0031056	0.0194465	78.4242	0.0195702	1	34	regulation of histone modification
set1F_H3K4me- clr3∆	Sense	Downregulated	CC	GO:0005694	0.0196106	22.1147	0.24981	2	438	chromosome
clr3∆	Sense	Downregulated	MF	GO:0004364	0.0196368	62.3095	0.0197944	1	8	glutathione transferase activity
clr3∆	Sense	Downregulated	MF	GO:0019213	0.0196368	62.3095	0.0197944	1	8	deacetylase activity
set1F_H3K4me- clr3∆	Sense	Upregulated	MF	GO:0004860	0.0198331	65.3625	0.0199848	1	5	protein kinase inhibitor activity
set1F_H3K4me- clr3∆	Sense	Upregulated	MF	GO:0031386	0.0198331	65.3625	0.0199848	1	5	protein tag
set1F_H3K4me- clr3∆	Sense	Upregulated	MF	GO:0019210	0.0198331	65.3625	0.0199848	1	5	kinase inhibitor activity
set1F_H3K4me- clr3∆	Sense	Downregulated	CC	GO:0000792	0.0198332	76.8088	0.019962	1	35	heterochromatin
set1∆ clr3∆	Sense	Upregulated	BP	GO:0009051	0.0198463	12.6465	0.230238	2	6	pentose-phosphate shunt, oxidative branch
set1∆ clr3∆	Sense	Upregulated	BP	GO:0010672	0.0198463	12.6465	0.230238	2	6	regulation of transcription from RNA polymerase II promoter during meiosis
set1∆ clr3∆	Sense	Upregulated	BP	GO:0051156	0.0198463	12.6465	0.230238	2	6	glucose 6-phosphate metabolic process
set1∆ clr3∆	Sense	Upregulated	BP	GO:0006089	0.0198463	12.6465	0.230238	2	6	lactate metabolic process
set1F_H3K4me- clr3∆	Sense	Downregulated	BP	GO:0030466	0.0200147	76.1029	0.0201458	1	35	chromatin silencing at silent mating-type cassette
set1∆ clr3∆	Sense	Downregulated	MF	GO:0016278	0.0200222	10.6467	0.222687	2	13	lysine N-methyltransferase activity
set1∆ clr3∆	Sense	Downregulated	MF	GO:0016279	0.0200222	10.6467	0.222687	2	13	protein-lysine N-methyltransferase activity
clr3∆	Sense	Upregulated	MF	GO:0000287	0.0201757	10.119	0.220974	2	43	magnesium ion binding
clr3∆	Sense	Upregulated	MF	GO:0004845	0.0204036	66.9744	0.0205558	1	4	uracil phosphoribosyltransferase activity
clr3∆	Sense	Upregulated	MF	GO:0004602	0.0204036	66.9744	0.0205558	1	4	glutathione peroxidase activity
clr3∆	Sense	Upregulated	MF	GO:0004737	0.0204036	66.9744	0.0205558	1	4	pyruvate decarboxylase activity
set1F_H3K4me- clr3∆	Sense	Upregulated	BP	GO:0042221	0.0206305	5.812	0.598619	3	156	response to chemical stimulus
set1∆ clr3∆	Sense	Upregulated	MF	GO:0030976	0.0206757	12.3627	0.235249	2	6	thiamine pyrophosphate binding
set1∆ clr3∆	Sense	Upregulated	MF	GO:0016641	0.0206757	12.3627	0.235249	2	6	oxidoreductase activity, acting on the CH-NH2 groUpregulated of donors, oxygen as acceptor
set1∆ clr3∆	Sense	Upregulated	BP	GO:0009311	0.0209206	4.2415	1.07444	4	28	oligosaccharide metabolic process
set1F_H3K4me- clr3∆	Sense	Upregulated	MF	GO:0016491	0.0209269	4.35909	1.08717	4	272	oxidoreductase activity
set1∆ clr3∆	Sense	Upregulated	BP	GO:0046365	0.0212412	3.44768	1.61167	5	42	monosaccharide catabolic process
set1∆ clr3∆	Sense	Downregulated	BP	GO:0006400	0.0215277	4.06827	1.0683	4	64	tRNA modification
clr3∆	Sense	Upregulated	BP	GO:0046164	0.0217751	9.71834	0.230238	2	48	alcohol catabolic process
clr3∆	Sense	Upregulated	BP	GO:0006006	0.0217751	9.71834	0.230238	2	48	glucose metabolic process
set1∆ clr3∆	Sense	Downregulated	BP	GO:0006783	0.0220055	10.0255	0.233691	2	14	heme biosynthetic process
clr3∆	Sense	Downregulated	MF	GO:0003688	0.0220663	54.5104	0.0222687	1	9	DownregulatedA replication origin binding
clr3∆	Sense	Downregulated	BP	GO:0000050	0.0222424	54.0729	0.0224482	1	9	urea cycle
clr3∆	Sense	Downregulated	BP	GO:0000183	0.0222424	54.0729	0.0224482	1	9	chromatin silencing at rDownregulatedA
set1F_H3K4me-	Sense	Upregulated	CC	GO:0015934	0.0222537	10.4207	0.237643	2	125	large ribosomal subunit
set1∆ clr3∆	Sense	Downregulated	BP	GO:0006399	0.0223036	2.93886	2.20338	6	132	tRNA metabolic process
set1∆ clr3∆	Sense	Upregulated	MF	GO:0016209	0.0228041	5.72376	0.627332	3	16	antioxidant activity
set1F_H3K4me-	Sense	Upregulated	MF	GO:0022804	0.0229768	10.238	0.241721	2	127	active transmembrane transporter activity
set1∆ clr3∆	Sense	Downregulated	CC	GO:0034708	0.0230528	9.76894	0.239544	2	14	methyltransferase complex
set1F_H3K4me- clr3∆	Sense	Downregulated	BP	GO:0000122	0.0239853	63.0244	0.024175	1	42	negative regulation of transcription from RNA polymerase II promoter
clr3∆	Sense	Upregulated	BP	GO:0006091	0.0243112	5.34672	0.633154	3	132	generation of precursor metabolites and energy
set1F_H3K4me- clr3∆	Sense	Upregulated	BP	GO:0034599	0.0244649	9.19355	0.245587	2	64	cellular response to oxidative stress
set1∆ clr3∆	Sense	Downregulated	CC	GO:0005829	0.0247482	1.55345	39.3023	49	2297	cytosol
set1∆ clr3∆	Sense	Downregulated	MF	GO:0003899	0.0248246	5.20284	0.633803	3	37	DownregulatedA-directed RNA polymerase activity
set1∆ clr3∆	Sense	Downregulated	BP	GO:0009065	0.025119	9.25249	0.250384	2	15	glutamine family amino acid catabolic process
set1∆ clr3∆	Sense	Downregulated	BP	GO:0000027	0.025119	9.25249	0.250384	2	15	ribosomal large subunit assembly
set1∆ clr3∆	Sense	Downregulated	BP	GO:0006779	0.025119	9.25249	0.250384	2	15	porphyrin-containing compound biosynthetic process
set1∆ clr3∆	Sense	Downregulated	BP	GO:0033014	0.025119	9.25249	0.250384	2	15	tetrapyrrole biosynthetic process
set1∆ clr3∆	Sense	Upregulated	BP	GO:0006739	0.0254376	5.43655	0.652341	3	17	NADP metabolic process
set1∆ clr3∆	Sense	Upregulated	BP	GO:0034614	0.0254376	5.43655	0.652341	3	17	cellular response to reactive oxygen species
set1∆ clr3∆	Sense	Upregulated	BP	GO:0032787	0.0255604	2.4152	3.56869	8	93	monocarboxylic acid metabolic process
set1F_H3K4me-	Sense	Upregulated	BP	GO:0000027	0.025625	46.3304	0.0259018	1	15	ribosomal large subunit assembly
clr3∆	Sense	Downregulated	CC	GO:0000775	0.0257356	9.26373	0.254563	2	103	chromosome, centromeric region
set1∆ clr3∆	Sense	Downregulated	CC	GO:0031974	0.0257913	1.72072	13.654	21	798	membrane-enclosed lumen
set1∆ clr3∆	Sense	Downregulated	MF	GO:0016853	0.0259117	3.82746	1.13057	4	66	isomerase activity
set1F_H3K4me- clr3∆	Sense	Upregulated	BP	GO:0006979	0.0259118	8.90278	0.253262	2	66	response to oxidative stress
set1F_H3K4me- clr3∆	Sense	Downregulated	BP	GO:0016571	0.0262494	57.3778	0.0264774	1	46	histone methylation
set1∆ clr3∆	Sense	Downregulated	MF	GO:0016860	0.026363	9.00524	0.256947	2	15	intramolecular oxidoreductase activity
set1∆ clr3∆	Sense	Downregulated	MF	GO:0016645	0.026363	9.00524	0.256947	2	15	oxidoreductase activity, acting on the CH-NH groUpregulated of donors
clr3∆	Sense	Upregulated	MF	GO:0022804	0.0264297	5.14415	0.652646	3	127	active transmembrane transporter activity
set1F_H3K4me- clr3∆	Sense	Upregulated	MF	GO:0016614	0.0264334	8.77929	0.255805	2	64	oxidoreductase activity, acting on CH-OH groUpregulated of donors
set1F_H3K4me- clr3∆	Sense	Upregulated	BP	GO:0051346	0.026569	45.4912	0.0268611	1	7	negative regulation of hydrolase activity
set1∆ clr3∆	Sense	Downregulated	MF	GO:0034062	0.0266258	5.0532	0.650933	3	38	RNA polymerase activity
set1F_H3K4me- clr3∆	Sense	Downregulated	BP	GO:0018130	0.0268148	56.1196	0.027053	1	47	heterocycle biosynthetic process
set1∆ clr3∆	Sense	Upregulated	MF	GO:0004857	0.026908	5.31386	0.66654	3	17	enzyme inhibitor activity
set1∆ clr3∆	Sense	Upregulated	BP	GO:0000083	0.0270897	10.1152	0.268611	2	7	regulation of transcription involved in G1/S phase of mitotic cell cycle
set1∆ clr3∆	Sense	Upregulated	BP	GO:0006771	0.0270897	10.1152	0.268611	2	7	riboflavin metabolic process
set1∆ clr3∆	Sense	Upregulated	BP	GO:0042819	0.0270897	10.1152	0.268611	2	7	vitamin B6 biosynthetic process
set1∆ clr3∆	Sense	Upregulated	BP	GO:0009231	0.0270897	10.1152	0.268611	2	7	riboflavin biosynthetic process
set1∆ clr3∆	Sense	Upregulated	BP	GO:0008655	0.0270897	10.1152	0.268611	2	7	pyrimidine-containing compound salvage
set1∆ clr3∆	Sense	Downregulated	BP	GO:0006790	0.027519	3.75162	1.15177	4	69	sulfur compound metabolic process
set1∆ clr3∆	Sense	Upregulated	CC	GO:0005887	0.0275653	3.19875	1.72319	5	44	integral to plasma membrane
set1F_H3K4me- clr3∆	Sense	Upregulated	MF	GO:0043140	0.027661	43.5583	0.0279787	1	7	ATP-dependent 3'-5' DownregulatedA helicase activity
set1F_H3K4me- clr3∆	Sense	Upregulated	MF	GO:0043138	0.027661	43.5583	0.0279787	1	7	3'-5' DownregulatedA helicase activity
set1F_H3K4me- clr3∆	Sense	Downregulated	BP	GO:0031399	0.0279451	53.7604	0.0282041	1	49	regulation of protein modification process
set1∆ clr3∆	Sense	Upregulated	MF	GO:0004558	0.028206	9.88824	0.274458	2	7	alpha-glucosidase activity
set1∆ clr3∆	Sense	Downregulated	BP	GO:0019627	0.0284003	8.58992	0.267076	2	16	urea metabolic process
set1∆ clr3∆	Sense	Downregulated	BP	GO:0042168	0.0284003	8.58992	0.267076	2	16	heme metabolic process
set1∆ clr3∆	Sense	Downregulated	BP	GO:0009168	0.0284003	8.58992	0.267076	2	16	purine ribonucleoside monophosphate biosynthetic process
set1∆ clr3∆	Sense	Downregulated	BP	GO:0009127	0.0284003	8.58992	0.267076	2	16	purine nucleoside monophosphate biosynthetic process
set1∆ clr3∆	Sense	Downregulated	BP	GO:0006396	0.0285514	1.94277	7.3112	13	438	RNA processing
set1∆ clr3∆	Sense	Upregulated	MF	GO:0016798	0.0290735	2.77444	2.35249	6	60	hydrolase activity, acting on glycosyl bonds
clr3∆	Sense	Downregulated	MF	GO:0016638	0.0293212	39.6212	0.0296917	1	12	oxidoreductase activity, acting on the CH-NH2 groUpregulated of donors
clr3∆	Sense	Downregulated	BP	GO:0006526	0.0295545	39.303	0.0299309	1	12	arginine biosynthetic process
clr3∆	Sense	Downregulated	BP	GO:0043604	0.0295545	39.303	0.0299309	1	12	amide biosynthetic process
set1F_H3K4me-	Sense	Upregulated	MF	GO:0003746	0.0300644	38.7333	0.030453	1	16	translation elongation factor activity
set1F_H3K4me- clr3∆	Sense	Upregulated	BP	GO:0030162	0.0303093	38.985	0.0306984	1	8	regulation of proteolysis
set1∆ clr3∆	Sense	Downregulated	BP	GO:0009260	0.0303544	4.78102	0.684382	3	41	ribonucleotide biosynthetic process
clr3∆	Sense	Upregulated	MF	GO:0015175	0.0304545	40.1692	0.0308337	1	6	neutral amino acid transmembrane transporter activity
clr3∆	Sense	Upregulated	MF	GO:0030976	0.0304545	40.1692	0.0308337	1	6	thiamine pyrophosphate binding
set1F_H3K4me- clr3∆	Sense	Downregulated	MF	GO:0016810	0.0305236	49.0377	0.0308337	1	54	hydrolase activity, acting on carbon-nitrogen (but not peptide) bonds
set1F_H3K4me- clr3∆	Sense	Downregulated	CC	GO:0044452	0.0310478	48.1759	0.0313688	1	55	nucleolar part
set1F_H3K4me- clr3∆	Sense	Downregulated	BP	GO:0006270	0.0313308	47.7315	0.0316577	1	55	DownregulatedA-dependent DownregulatedA replication initiation
set1F_H3K4me- clr3∆	Sense	Downregulated	BP	GO:0031497	0.0313308	47.7315	0.0316577	1	55	chromatin assembly
set1F_H3K4me- clr3∆	Sense	Upregulated	MF	GO:0008171	0.0315526	37.3286	0.0319756	1	8	O-methyltransferase activity
set1∆ clr3∆	Sense	Downregulated	BP	GO:0016070	0.0316385	1.63806	16.542	24	991	RNA metabolic process
clr3∆	Sense	Downregulated	MF	GO:0016884	0.0317285	36.3125	0.032166	1	13	carbon-nitrogen ligase activity, with glutamine as amido-N-donor
set1∆ clr3∆	Sense	Downregulated	BP	GO:0006778	0.031843	8.01569	0.283768	2	17	porphyrin-containing compound metabolic process
set1∆ clr3∆	Sense	Downregulated	BP	GO:0009167	0.031843	8.01569	0.283768	2	17	purine ribonucleoside monophosphate metabolic process
set1∆ clr3∆	Sense	Downregulated	BP	GO:0009126	0.031843	8.01569	0.283768	2	17	purine nucleoside monophosphate metabolic process
set1∆ clr3∆	Sense	Downregulated	BP	GO:0033013	0.031843	8.01569	0.283768	2	17	tetrapyrrole metabolic process
set1∆ clr3∆	Sense	Downregulated	BP	GO:0018205	0.031843	8.01569	0.283768	2	17	peptidyl-lysine modification
set1F_H3K4me- clr3∆	Sense	Downregulated	BP	GO:0030702	0.0318943	46.8545	0.0322333	1	56	chromatin silencing at centromere
clr3∆	Sense	Downregulated	BP	GO:0042493	0.0319806	36.0208	0.0324252	1	13	response to drug
set1F_H3K4me- clr3∆	Sense	Downregulated	MF	GO:0043565	0.0322009	46.3839	0.0325466	1	57	sequence-specific DownregulatedA binding
set1F_H3K4me- clr3∆	Sense	Downregulated	BP	GO:0006333	0.0324576	46.0089	0.0328089	1	57	chromatin assembly or disassembly
set1F_H3K4me- clr3∆	Sense	Downregulated	BP	GO:0033044	0.0324576	46.0089	0.0328089	1	57	regulation of chromosome organization
set1∆ clr3∆	Sense	Upregulated	BP	GO:0045333	0.0327455	2.68855	2.4175	6	63	cellular respiration
set1∆ clr3∆	Sense	Upregulated	BP	GO:0005996	0.0329267	2.4539	3.06984	7	80	monosaccharide metabolic process
set1∆ clr3∆	Sense	Downregulated	BP	GO:0019547	0.033109	59.5814	0.0333845	1	2	arginine catabolic process to ornithine
set1∆ clr3∆	Sense	Downregulated	BP	GO:0006433	0.033109	59.5814	0.0333845	1	2	prolyl-tRNA aminoacylation
set1∆ clr3∆	Sense	Downregulated	BP	GO:0006436	0.033109	59.5814	0.0333845	1	2	tryptophanyl-tRNA aminoacylation
set1∆ clr3∆	Sense	Downregulated	BP	GO:0006167	0.033109	59.5814	0.0333845	1	2	AMP biosynthetic process
set1∆ clr3∆	Sense	Downregulated	BP	GO:0046033	0.033109	59.5814	0.0333845	1	2	AMP metabolic process
set1∆ clr3∆	Sense	Downregulated	BP	GO:0046036	0.033109	59.5814	0.0333845	1	2	CTP metabolic process
set1∆ clr3∆	Sense	Downregulated	BP	GO:0006241	0.033109	59.5814	0.0333845	1	2	CTP biosynthetic process
set1∆ clr3∆	Sense	Downregulated	BP	GO:0042883	0.033109	59.5814	0.0333845	1	2	cysteine transport
set1∆ clr3∆	Sense	Downregulated	BP	GO:0009256	0.033109	59.5814	0.0333845	1	2	10-formyltetrahydrofolate metabolic process
set1∆ clr3∆	Sense	Downregulated	BP	GO:0009257	0.033109	59.5814	0.0333845	1	2	10-formyltetrahydrofolate biosynthetic process
set1∆ clr3∆	Sense	Downregulated	BP	GO:0009208	0.033109	59.5814	0.0333845	1	2	pyrimidine ribonucleoside triphosphate metabolic process
set1∆ clr3∆	Sense	Downregulated	BP	GO:0009209	0.033109	59.5814	0.0333845	1	2	pyrimidine ribonucleoside triphosphate biosynthetic process
set1∆ clr3∆	Sense	Downregulated	BP	GO:0046114	0.033109	59.5814	0.0333845	1	2	guanosine biosynthetic process
set1∆ clr3∆	Sense	Downregulated	BP	GO:0046116	0.033109	59.5814	0.0333845	1	2	queuosine metabolic process
set1∆ clr3∆	Sense	Downregulated	BP	GO:0046118	0.033109	59.5814	0.0333845	1	2	7-methylguanosine biosynthetic process
set1∆ clr3∆	Sense	Downregulated	BP	GO:0018212	0.033109	59.5814	0.0333845	1	2	peptidyl-tyrosine modification
set1∆ clr3∆	Sense	Downregulated	BP	GO:0008616	0.033109	59.5814	0.0333845	1	2	queuosine biosynthetic process
set1∆ clr3∆	Sense	Downregulated	BP	GO:0008618	0.033109	59.5814	0.0333845	1	2	7-methylguanosine metabolic process
clr3∆	Sense	Upregulated	BP	GO:0006771	0.0331158	35.9792	0.0335764	1	7	riboflavin metabolic process
clr3∆	Sense	Upregulated	BP	GO:0030042	0.0331158	35.9792	0.0335764	1	7	actin filament depolymerization
clr3∆	Sense	Upregulated	BP	GO:0009231	0.0331158	35.9792	0.0335764	1	7	riboflavin biosynthetic process
clr3∆	Sense	Upregulated	BP	GO:0008655	0.0331158	35.9792	0.0335764	1	7	pyrimidine-containing compound salvage
set1∆ clr3∆	Sense	Downregulated	CC	GO:0043528	0.033931	58.0787	0.0342205	1	2	tRNA (m2G10) methyltransferase complex
set1∆ clr3∆	Sense	Downregulated	CC	GO:0002144	0.033931	58.0787	0.0342205	1	2	cytosolic tRNA wobble base thiouridylase complex
set1∆ clr3∆	Sense	Downregulated	MF	GO:0004827	0.0339694	58.0112	0.0342596	1	2	proline-tRNA ligase activity
set1∆ clr3∆	Sense	Downregulated	MF	GO:0004053	0.0339694	58.0112	0.0342596	1	2	arginase activity
set1∆ clr3∆	Sense	Downregulated	MF	GO:0004056	0.0339694	58.0112	0.0342596	1	2	argininosuccinate lyase activity
set1∆ clr3∆	Sense	Downregulated	MF	GO:0004830	0.0339694	58.0112	0.0342596	1	2	tryptophan-tRNA ligase activity
set1∆ clr3∆	Sense	Downregulated	MF	GO:0046570	0.0339694	58.0112	0.0342596	1	2	methylthioribulose 1-phosphate dehydratase activity
set1∆ clr3∆	Sense	Downregulated	MF	GO:0004809	0.0339694	58.0112	0.0342596	1	2	tRNA (guanine-N2-)-methyltransferase activity
set1∆ clr3∆	Sense	Downregulated	MF	GO:0033229	0.0339694	58.0112	0.0342596	1	2	cysteine transmembrane transporter activity
set1∆ clr3∆	Sense	Downregulated	MF	GO:0004326	0.0339694	58.0112	0.0342596	1	2	tetrahydrofolylpolyglutamate synthase activity
set1∆ clr3∆	Sense	Downregulated	MF	GO:0004329	0.0339694	58.0112	0.0342596	1	2	formate-tetrahydrofolate ligase activity
set1∆ clr3∆	Sense	Downregulated	MF	GO:0004488	0.0339694	58.0112	0.0342596	1	2	methylenetetrahydrofolate dehydrogenase (NADP+) activity
set1∆ clr3∆	Sense	Downregulated	MF	GO:0004477	0.0339694	58.0112	0.0342596	1	2	methenyltetrahydrofolate cyclohydrolase activity
set1∆ clr3∆	Sense	Downregulated	MF	GO:0016730	0.0339694	58.0112	0.0342596	1	2	oxidoreductase activity, acting on iron-sulfur proteins as donors
set1∆ clr3∆	Sense	Downregulated	MF	GO:0016898	0.0339694	58.0112	0.0342596	1	2	oxidoreductase activity, acting on the CH-OH groUpregulated of donors, cytochrome as acceptor
set1∆ clr3∆	Sense	Downregulated	MF	GO:0042781	0.0339694	58.0112	0.0342596	1	2	3'-tRNA processing endoribonuclease activity
set1∆ clr3∆	Sense	Downregulated	MF	GO:0016863	0.0339694	58.0112	0.0342596	1	2	intramolecular oxidoreductase activity, transposing C=C bonds
set1∆ clr3∆	Sense	Downregulated	MF	GO:0008479	0.0339694	58.0112	0.0342596	1	2	queuine tRNA-ribosyltransferase activity
set1∆ clr3∆	Sense	Downregulated	MF	GO:0005459	0.0339694	58.0112	0.0342596	1	2	UDP-galactose transmembrane transporter activity
clr3∆	Sense	Upregulated	BP	GO:0019318	0.0340147	7.55785	0.292594	2	61	hexose metabolic process
clr3∆	Sense	Downregulated	CC	GO:0005736	0.0340918	33.5513	0.0346008	1	14	DownregulatedA-directed RNA polymerase I complex
set1∆ clr3∆	Sense	Upregulated	BP	GO:0040020	0.0342761	4.75508	0.729087	3	19	regulation of meiosis
set1∆ clr3∆	Sense	Downregulated	BP	GO:0030490	0.0343193	4.54018	0.717767	3	43	maturation of SSU-rRNA
set1F_H3K4me- clr3∆	Sense	Downregulated	BP	GO:0006479	0.0347085	42.9083	0.0351113	1	61	protein methylation
set1F_H3K4me- clr3∆	Sense	Downregulated	BP	GO:0008213	0.0347085	42.9083	0.0351113	1	61	protein alkylation
set1∆ clr3∆	Sense	Downregulated	BP	GO:0046483	0.0348634	1.93184	6.74367	12	404	heterocycle metabolic process
set1F_H3K4me- clr3∆	Sense	Downregulated	CC	GO:0043596	0.0349526	42.5902	0.0353612	1	62	nuclear replication fork
set1∆ clr3∆	Sense	Upregulated	BP	GO:0042726	0.0352189	8.42761	0.306984	2	8	flavin-containing compound metabolic process
set1∆ clr3∆	Sense	Upregulated	BP	GO:0042727	0.0352189	8.42761	0.306984	2	8	flavin-containing compound biosynthetic process
set1F_H3K4me- clr3∆	Sense	Upregulated	MF	GO:0004497	0.0354294	32.6562	0.0359726	1	9	monooxygenase activity
clr3∆	Sense	Upregulated	MF	GO:0043140	0.0354427	33.4679	0.0359726	1	7	ATP-dependent 3'-5' DownregulatedA helicase activity
clr3∆	Sense	Upregulated	MF	GO:0043138	0.0354427	33.4679	0.0359726	1	7	3'-5' DownregulatedA helicase activity
clr3∆	Sense	Upregulated	MF	GO:0019238	0.0354427	33.4679	0.0359726	1	7	cyclohydrolase activity
set1F_H3K4me- clr3∆	Sense	Downregulated	BP	GO:0034728	0.0358327	41.5081	0.0362625	1	63	nucleosome organization
clr3∆	Sense	Upregulated	MF	GO:0048037	0.0358342	4.54196	0.734869	3	143	cofactor binding
set1F_H3K4me- clr3∆	Sense	Downregulated	CC	GO:0005657	0.0360663	41.2222	0.0365019	1	64	replication fork
set1∆ clr3∆	Sense	Upregulated	MF	GO:0004364	0.0366498	8.23856	0.313666	2	8	glutathione transferase activity
clr3∆	Sense	Downregulated	BP	GO:0009065	0.036816	30.8631	0.0374137	1	15	glutamine family amino acid catabolic process
set1F_H3K4me- clr3∆	Sense	Downregulated	BP	GO:0006807	0.0371651	Inf	1.00153	3	1740	nitrogen compound metabolic process
clr3∆	Sense	Upregulated	BP	GO:0042726	0.0377599	30.8333	0.038373	1	8	flavin-containing compound metabolic process
clr3∆	Sense	Upregulated	BP	GO:0042727	0.0377599	30.8333	0.038373	1	8	flavin-containing compound biosynthetic process
clr3∆	Sense	Upregulated	BP	GO:0006541	0.0377599	30.8333	0.038373	1	8	glutamine metabolic process
clr3∆	Sense	Upregulated	BP	GO:0001300	0.0377599	30.8333	0.038373	1	8	chronological cell aging
clr3∆	Sense	Upregulated	BP	GO:0000160	0.0377599	30.8333	0.038373	1	8	two-component signal transduction system (phosphorelay)
set1∆ clr3∆	Sense	Upregulated	BP	GO:0046521	0.038373	Inf	0.038373	1	1	sphingoid catabolic process
set1∆ clr3∆	Sense	Upregulated	BP	GO:0046514	0.038373	Inf	0.038373	1	1	ceramide catabolic process
set1∆ clr3∆	Sense	Upregulated	BP	GO:0034440	0.038373	Inf	0.038373	1	1	lipid oxidation
set1∆ clr3∆	Sense	Upregulated	BP	GO:0006315	0.038373	Inf	0.038373	1	1	homing of groUpregulated II introns
set1∆ clr3∆	Sense	Upregulated	BP	GO:0043392	0.038373	Inf	0.038373	1	1	negative regulation of DownregulatedA binding
set1∆ clr3∆	Sense	Upregulated	BP	GO:0043433	0.038373	Inf	0.038373	1	1	negative regulation of sequence-specific DownregulatedA binding transcription factor activity
set1∆ clr3∆	Sense	Upregulated	BP	GO:0000091	0.038373	Inf	0.038373	1	1	mitotic anaphase A
set1∆ clr3∆	Sense	Upregulated	BP	GO:0070458	0.038373	Inf	0.038373	1	1	cellular detoxification of nitrogen compound
set1∆ clr3∆	Sense	Upregulated	BP	GO:0015748	0.038373	Inf	0.038373	1	1	organophosphate ester transport
set1∆ clr3∆	Sense	Upregulated	BP	GO:0042822	0.038373	Inf	0.038373	1	1	pyridoxal phosphate metabolic process
set1∆ clr3∆	Sense	Upregulated	BP	GO:0042823	0.038373	Inf	0.038373	1	1	pyridoxal phosphate biosynthetic process
set1∆ clr3∆	Sense	Upregulated	BP	GO:0015886	0.038373	Inf	0.038373	1	1	heme transport
set1∆ clr3∆	Sense	Upregulated	BP	GO:0019395	0.038373	Inf	0.038373	1	1	fatty acid oxidation
set1∆ clr3∆	Sense	Upregulated	BP	GO:0019377	0.038373	Inf	0.038373	1	1	glycolipid catabolic process
set1∆ clr3∆	Sense	Upregulated	BP	GO:0046477	0.038373	Inf	0.038373	1	1	glycosylceramide catabolic process
set1∆ clr3∆	Sense	Upregulated	BP	GO:0006677	0.038373	Inf	0.038373	1	1	glycosylceramide metabolic process
set1∆ clr3∆	Sense	Upregulated	BP	GO:0006635	0.038373	Inf	0.038373	1	1	fatty acid beta-oxidation
set1∆ clr3∆	Sense	Upregulated	BP	GO:0051410	0.038373	Inf	0.038373	1	1	detoxification of nitrogen compound
set1∆ clr3∆	Sense	Upregulated	BP	GO:0015695	0.038373	Inf	0.038373	1	1	organic cation transport
set1∆ clr3∆	Sense	Upregulated	BP	GO:0015696	0.038373	Inf	0.038373	1	1	ammonium transport
set1∆ clr3∆	Sense	Upregulated	BP	GO:0005994	0.038373	Inf	0.038373	1	1	melibiose metabolic process
set1∆ clr3∆	Sense	Upregulated	BP	GO:0005995	0.038373	Inf	0.038373	1	1	melibiose catabolic process
set1∆ clr3∆	Sense	Upregulated	BP	GO:0001407	0.038373	Inf	0.038373	1	1	glycerophosphodiester transport
set1∆ clr3∆	Sense	Upregulated	BP	GO:0045749	0.038373	Inf	0.038373	1	1	negative regulation of S phase of mitotic cell cycle
set1∆ clr3∆	Sense	Upregulated	BP	GO:0019407	0.038373	Inf	0.038373	1	1	hexitol catabolic process
set1∆ clr3∆	Sense	Upregulated	BP	GO:0051100	0.038373	Inf	0.038373	1	1	negative regulation of binding
set1∆ clr3∆	Sense	Upregulated	BP	GO:0006059	0.038373	Inf	0.038373	1	1	hexitol metabolic process
set1∆ clr3∆	Sense	Upregulated	MF	GO:0004553	0.0385288	2.89541	1.88199	5	48	hydrolase activity, hydrolyzing O-glycosyl compounds
set1∆ clr3∆	Sense	Upregulated	CC	GO:0009536	0.0391635	Inf	0.0391635	1	1	plastid
set1∆ clr3∆	Sense	Upregulated	CC	GO:0009507	0.0391635	Inf	0.0391635	1	1	chloroplast
set1∆ clr3∆	Sense	Upregulated	CC	GO:0031232	0.0391635	Inf	0.0391635	1	1	extrinsic to external side of plasma membrane
set1F_H3K4me- clr3∆	Sense	Downregulated	BP	GO:0044249	0.0391883	Inf	1.01938	3	1771	cellular biosynthetic process
set1∆ clr3∆	Sense	Upregulated	MF	GO:0015605	0.0392082	Inf	0.0392082	1	1	organophosphate ester transmembrane transporter activity
set1∆ clr3∆	Sense	Upregulated	MF	GO:0004096	0.0392082	Inf	0.0392082	1	1	catalase activity
set1∆ clr3∆	Sense	Upregulated	MF	GO:0003857	0.0392082	Inf	0.0392082	1	1	3-hydroxyacyl-CoA dehydrogenase activity
set1∆ clr3∆	Sense	Upregulated	MF	GO:0031320	0.0392082	Inf	0.0392082	1	1	hexitol dehydrogenase activity
set1∆ clr3∆	Sense	Upregulated	MF	GO:0003884	0.0392082	Inf	0.0392082	1	1	D-amino-acid oxidase activity
set1∆ clr3∆	Sense	Upregulated	MF	GO:0046526	0.0392082	Inf	0.0392082	1	1	D-xylulose reductase activity
set1∆ clr3∆	Sense	Upregulated	MF	GO:0004034	0.0392082	Inf	0.0392082	1	1	aldose 1-epimerase activity
set1∆ clr3∆	Sense	Upregulated	MF	GO:0004557	0.0392082	Inf	0.0392082	1	1	alpha-galactosidase activity
set1∆ clr3∆	Sense	Upregulated	MF	GO:0008888	0.0392082	Inf	0.0392082	1	1	glycerol dehydrogenase activity
set1∆ clr3∆	Sense	Upregulated	MF	GO:0004623	0.0392082	Inf	0.0392082	1	1	phospholipase A2 activity
set1∆ clr3∆	Sense	Upregulated	MF	GO:0030060	0.0392082	Inf	0.0392082	1	1	L-malate dehydrogenase activity
set1∆ clr3∆	Sense	Upregulated	MF	GO:0015925	0.0392082	Inf	0.0392082	1	1	galactosidase activity
set1∆ clr3∆	Sense	Upregulated	MF	GO:0050040	0.0392082	Inf	0.0392082	1	1	lactate 2-monooxygenase activity
set1∆ clr3∆	Sense	Upregulated	MF	GO:0008514	0.0392082	Inf	0.0392082	1	1	organic anion transmembrane transporter activity
set1∆ clr3∆	Sense	Upregulated	MF	GO:0042132	0.0392082	Inf	0.0392082	1	1	fructose 1,6-bisphosphate 1-phosphatase activity
set1∆ clr3∆	Sense	Upregulated	MF	GO:0051268	0.0392082	Inf	0.0392082	1	1	alpha-keto amide reductase activity
set1∆ clr3∆	Sense	Upregulated	MF	GO:0051269	0.0392082	Inf	0.0392082	1	1	alpha-keto ester reductase activity
set1∆ clr3∆	Sense	Upregulated	MF	GO:0004300	0.0392082	Inf	0.0392082	1	1	enoyl-CoA hydratase activity
set1∆ clr3∆	Sense	Upregulated	MF	GO:0004460	0.0392082	Inf	0.0392082	1	1	L-lactate dehydrogenase (cytochrome) activity
set1∆ clr3∆	Sense	Upregulated	MF	GO:0004459	0.0392082	Inf	0.0392082	1	1	L-lactate dehydrogenase activity
set1∆ clr3∆	Sense	Upregulated	MF	GO:0016703	0.0392082	Inf	0.0392082	1	1	oxidoreductase activity, acting on single donors with incorporation of molecular oxygen, incorporation of one atom of oxygen (internal monooxygenases or internal mixed function oxidases)
set1∆ clr3∆	Sense	Upregulated	MF	GO:0016708	0.0392082	Inf	0.0392082	1	1	oxidoreductase activity, acting on paired donors, with incorporation or reduction of molecular oxygen, NADH or NADPH as one donor, and incorporation of two atoms of oxygen into one donor
set1∆ clr3∆	Sense	Upregulated	MF	GO:0046941	0.0392082	Inf	0.0392082	1	1	azetidine-2-carboxylic acid acetyltransferase activity
set1∆ clr3∆	Sense	Upregulated	MF	GO:0003939	0.0392082	Inf	0.0392082	1	1	L-iditol 2-dehydrogenase activity
set1∆ clr3∆	Sense	Upregulated	MF	GO:0032542	0.0392082	Inf	0.0392082	1	1	sulfiredoxin activity
set1∆ clr3∆	Sense	Upregulated	MF	GO:0001406	0.0392082	Inf	0.0392082	1	1	glycerophosphodiester transmembrane transporter activity
set1∆ clr3∆	Sense	Upregulated	MF	GO:0051575	0.0392082	Inf	0.0392082	1	1	5'-deoxyribose-5-phosphate lyase activity
set1∆ clr3∆	Sense	Upregulated	MF	GO:0016652	0.0392082	Inf	0.0392082	1	1	oxidoreductase activity, acting on NADH or NADPH, NAD or NADP as acceptor
set1∆ clr3∆	Sense	Upregulated	MF	GO:0008941	0.0392082	Inf	0.0392082	1	1	nitric oxide dioxygenase activity
set1∆ clr3∆	Sense	Upregulated	MF	GO:0004719	0.0392082	Inf	0.0392082	1	1	protein-L-isoaspartate (D-aspartate) O-methyltransferase activity
set1∆ clr3∆	Sense	Upregulated	MF	GO:0047018	0.0392082	Inf	0.0392082	1	1	indole-3-acetaldehyde reductase (NADH) activity
set1∆ clr3∆	Sense	Upregulated	MF	GO:0047019	0.0392082	Inf	0.0392082	1	1	indole-3-acetaldehyde reductase (NADPH) activity
set1∆ clr3∆	Sense	Upregulated	MF	GO:0008108	0.0392082	Inf	0.0392082	1	1	UDP-glucose:hexose-1-phosphate uridylyltransferase activity
set1∆ clr3∆	Sense	Upregulated	BP	GO:0000302	0.0392158	4.47447	0.76746	3	20	response to reactive oxygen species
clr3∆	Sense	Downregulated	BP	GO:0019627	0.0392254	28.8	0.0399079	1	16	urea metabolic process
clr3∆	Sense	Downregulated	BP	GO:0006525	0.0392254	28.8	0.0399079	1	16	arginine metabolic process
clr3∆	Sense	Upregulated	BP	GO:0009628	0.0392948	6.9606	0.316577	2	66	response to abiotic stimulus
set1∆ clr3∆	Sense	Upregulated	BP	GO:0046496	0.0396905	3.38912	1.30468	4	34	nicotinamide nucleotide metabolic process
set1F_H3K4me- clr3∆	Sense	Downregulated	BP	GO:0009058	0.0401256	Inf	1.02744	3	1785	biosynthetic process
clr3∆	Sense	Upregulated	MF	GO:0004601	0.0404061	28.6813	0.0411115	1	8	peroxidase activity
clr3∆	Sense	Upregulated	MF	GO:0004364	0.0404061	28.6813	0.0411115	1	8	glutathione transferase activity
clr3∆	Sense	Upregulated	MF	GO:0016684	0.0404061	28.6813	0.0411115	1	8	oxidoreductase activity, acting on peroxide as acceptor
set1∆ clr3∆	Sense	Downregulated	BP	GO:0016571	0.0407452	4.22093	0.767843	3	46	histone methylation
clr3∆	Sense	Downregulated	CC	GO:0031933	0.0412562	27.2448	0.0420152	1	17	telomeric heterochromatin
set1∆ clr3∆	Sense	Upregulated	MF	GO:0008236	0.0414071	4.37351	0.784164	3	20	serine-type peptidase activity
set1∆ clr3∆	Sense	Upregulated	MF	GO:0016651	0.0414071	4.37351	0.784164	3	20	oxidoreductase activity, acting on NADH or NADPH
set1F_H3K4me- clr3∆	Sense	Downregulated	BP	GO:0006323	0.0420001	35.1781	0.042594	1	74	DownregulatedA packaging
clr3∆	Sense	Upregulated	MF	GO:0016614	0.0421735	6.66452	0.328892	2	64	oxidoreductase activity, acting on CH-OH groUpregulated of donors
set1∆ clr3∆	Sense	Downregulated	BP	GO:0009156	0.0430794	6.67582	0.333845	2	20	ribonucleoside monophosphate biosynthetic process
set1∆ clr3∆	Sense	Upregulated	BP	GO:0006769	0.0435144	3.27913	1.34305	4	35	nicotinamide metabolic process
set1∆ clr3∆	Sense	Upregulated	BP	GO:0009820	0.0435144	3.27913	1.34305	4	35	alkaloid metabolic process
clr3∆	Sense	Downregulated	CC	GO:0031934	0.0436334	25.6373	0.0444867	1	18	mating-type region heterochromatin
set1∆ clr3∆	Sense	Upregulated	BP	GO:0000082	0.0441559	7.22222	0.345357	2	9	G1/S transition of mitotic cell cycle
set1∆ clr3∆	Sense	Upregulated	BP	GO:0042816	0.0441559	7.22222	0.345357	2	9	vitamin B6 metabolic process
set1∆ clr3∆	Sense	Upregulated	BP	GO:0044270	0.044569	2.76812	1.95702	5	51	cellular nitrogen compound catabolic process
set1∆ clr3∆	Sense	Downregulated	CC	GO:0010339	0.0450559	6.50505	0.342205	2	20	external side of cell wall
set1F_H3K4me- clr3∆	Sense	Upregulated	BP	GO:0034620	0.0451347	24.7895	0.0460476	1	12	cellular response to unfolded protein
set1F_H3K4me- clr3∆	Sense	Upregulated	BP	GO:0006986	0.0451347	24.7895	0.0460476	1	12	response to unfolded protein
set1F_H3K4me- clr3∆	Sense	Upregulated	BP	GO:0009607	0.0451347	24.7895	0.0460476	1	12	response to biotic stimulus
set1∆ clr3∆	Sense	Upregulated	BP	GO:0034220	0.0451422	2.46924	2.60936	6	68	ion transmembrane transport
set1∆ clr3∆	Sense	Downregulated	BP	GO:0051186	0.0451984	2.45679	2.60399	6	156	cofactor metabolic process
clr3∆	Sense	Upregulated	MF	GO:0015179	0.0453449	25.0913	0.0462505	1	9	L-amino acid transmembrane transporter activity
clr3∆	Sense	Upregulated	MF	GO:0004497	0.0453449	25.0913	0.0462505	1	9	monooxygenase activity
set1F_H3K4me-	Sense	Upregulated	BP	GO:0042255	0.045703	24.8894	0.0466232	1	27	ribosome assembly
set1∆ clr3∆	Sense	Upregulated	CC	GO:0019897	0.0458295	7.06863	0.352471	2	9	extrinsic to plasma membrane
clr3∆	Sense	Downregulated	CC	GO:0005576	0.0460052	24.2083	0.0469582	1	19	extracellular region
clr3∆	Sense	Downregulated	BP	GO:0031929	0.0464201	23.9861	0.0473906	1	19	TOR signaling cascade
clr3∆	Sense	Upregulated	BP	GO:0007568	0.0469837	23.9722	0.0479662	1	10	aging
clr3∆	Sense	Upregulated	BP	GO:0007569	0.0469837	23.9722	0.0479662	1	10	cell aging
clr3∆	Sense	Upregulated	MF	GO:0022857	0.047127	3.24354	1.38751	4	270	transmembrane transporter activity
clr3∆	Sense	Upregulated	BP	GO:0016052	0.0471756	6.26577	0.350153	2	73	carbohydrate catabolic process
set1∆ clr3∆	Sense	Upregulated	BP	GO:0009063	0.0475385	3.17602	1.38143	4	36	cellular amino acid catabolic process
set1∆ clr3∆	Sense	Upregulated	BP	GO:0019362	0.0475385	3.17602	1.38143	4	36	pyridine nucleotide metabolic process
set1∆ clr3∆	Sense	Downregulated	MF	GO:0016829	0.0475541	3.11383	1.37038	4	80	lyase activity
clr3∆	Sense	Upregulated	MF	GO:0016491	0.0482087	3.21804	1.39779	4	272	oxidoreductase activity
set1F_H3K4me-	Sense	Upregulated	CC	GO:0022626	0.0487218	6.69444	0.363118	2	191	cytosolic ribosome
clr3∆	Sense	Downregulated	CC	GO:0044454	0.0489178	4.30263	0.852662	3	345	nuclear chromosome part
set1F_H3K4me-	Sense	Upregulated	BP	GO:0042273	0.0490134	23.1027	0.0500767	1	29	ribosomal large subunit biogenesis
set1∆ clr3∆	Sense	Downregulated	BP	GO:0016558	0.0492548	29.7849	0.0500767	1	3	protein import into peroxisome matrix
set1∆ clr3∆	Sense	Downregulated	BP	GO:0016584	0.0492548	29.7849	0.0500767	1	3	nucleosome positioning
set1∆ clr3∆	Sense	Downregulated	BP	GO:0000101	0.0492548	29.7849	0.0500767	1	3	sulfur amino acid transport
set1∆ clr3∆	Sense	Downregulated	MF	GO:0016836	0.0493568	6.15431	0.359726	2	21	hydro-lyase activity
set1∆ clr3∆	Sense	Upregulated	CC	GO:0005829	0.0494408	1.27746	89.9586	102	2297	cytosol
set1∆ clr3∆	Sense	Downregulated	BP	GO:0006139	0.0494562	1.48805	25.4557	33	1525	nucleobase-containing compound metabolic process
clr3∆	Sense	Downregulated	MF	GO:0003677	0.0497737	4.27064	0.858584	3	347	DownregulatedA binding
clr3∆	Sense	Downregulated	CC	GO:0005730	0.0499909	4.26261	0.860076	3	348	nucleolus
