# Supplementary figures and images for: Heterochromatin assembly and transcriptome repression by Set1 in coordination with a class II histone deacetylase
Source: eLife journal article supplement (doi:10.7554/elife.04506), 2014-12-15

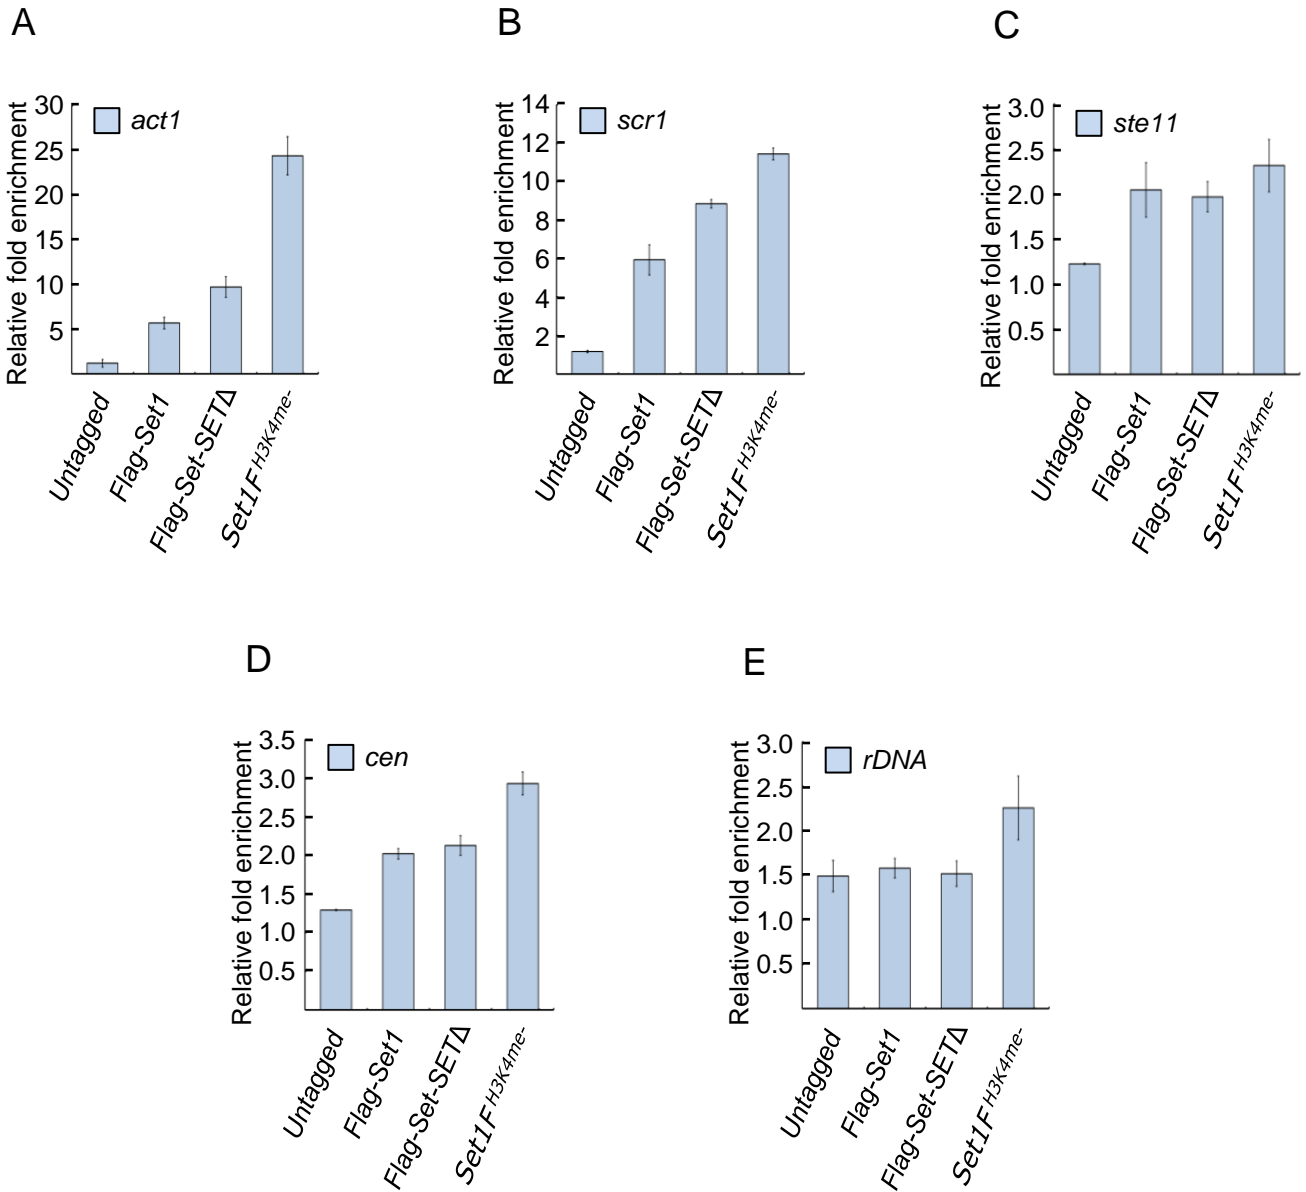

Supplement: supp [file elife_poa_e04506_Figure_2_figure_supplement_1.pdf › elife_poa_e04506_Figure_2_figure_supplement_1.pdf]

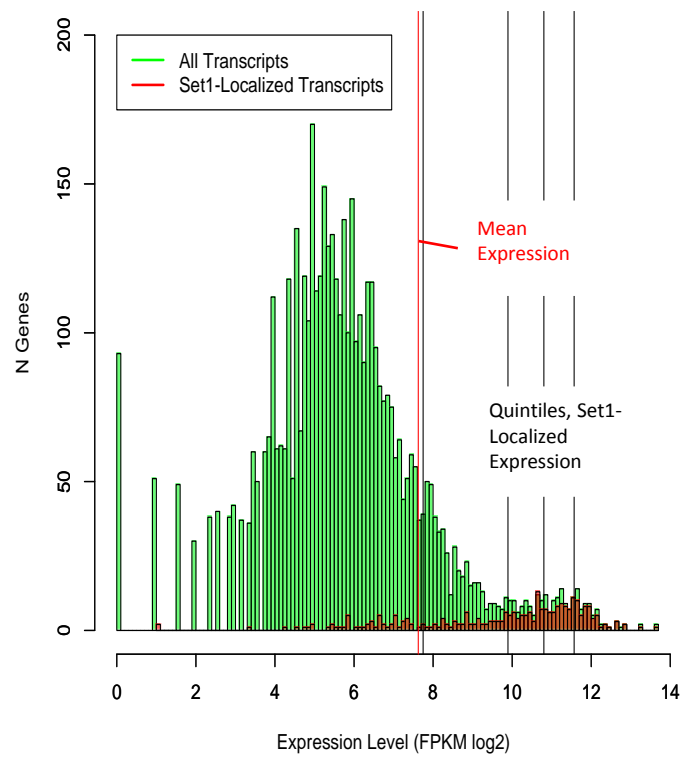

Supplement: supp [file elife_poa_e04506_Figure_2_figure_supplement_2.pdf › elife_poa_e04506_Figure_2_figure_supplement_2.pdf]

## Centromere 1

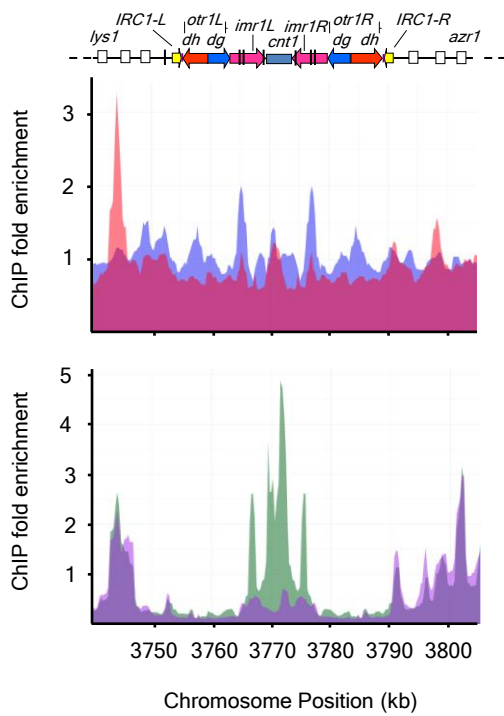

## Centromere 3

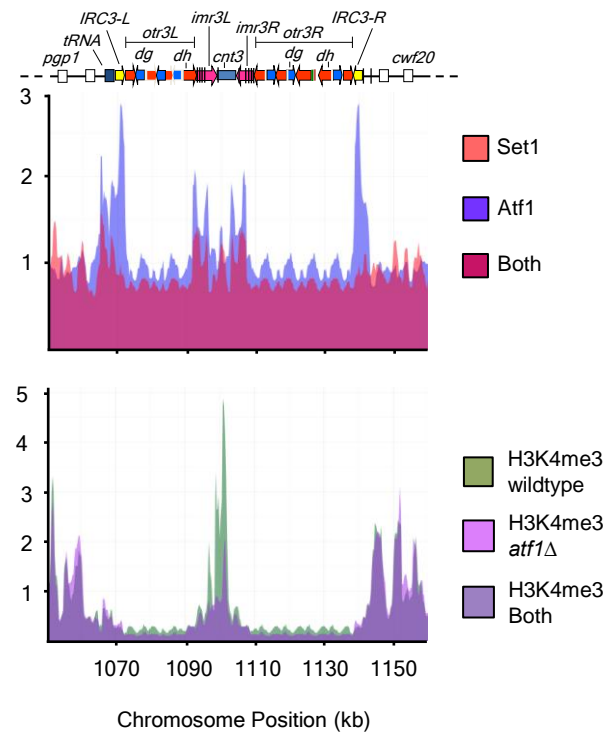

Supplement: supp [file elife_poa_e04506_Figure_3_figure_supplement_1.pdf › elife_poa_e04506_Figure_3_figure_supplement_1.pdf]

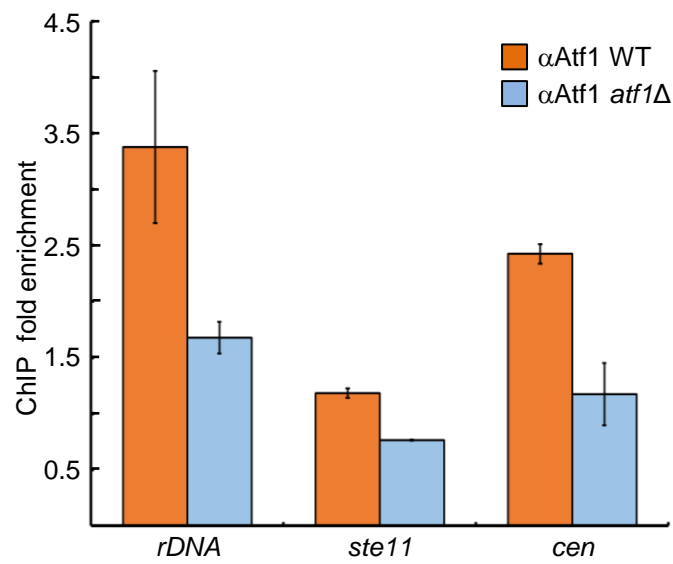

Supplement: supp [file elife_poa_e04506_Figure_3_figure_supplement_2.pdf › elife_poa_e04506_Figure_3_figure_supplement_2.pdf]

A

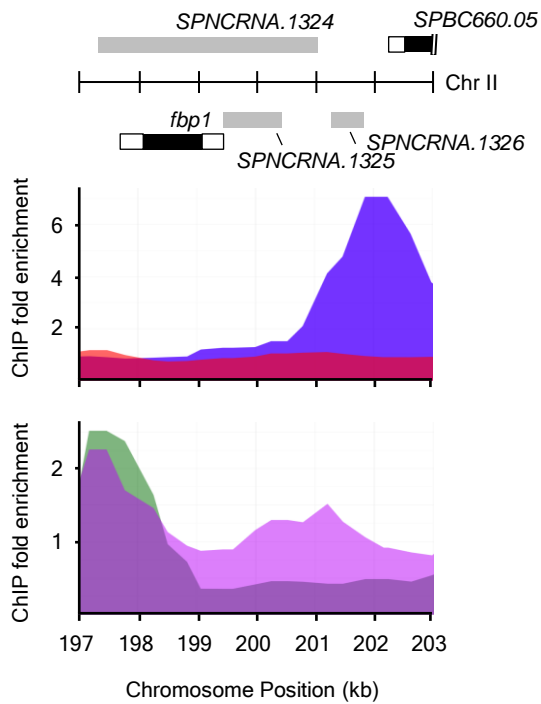

B

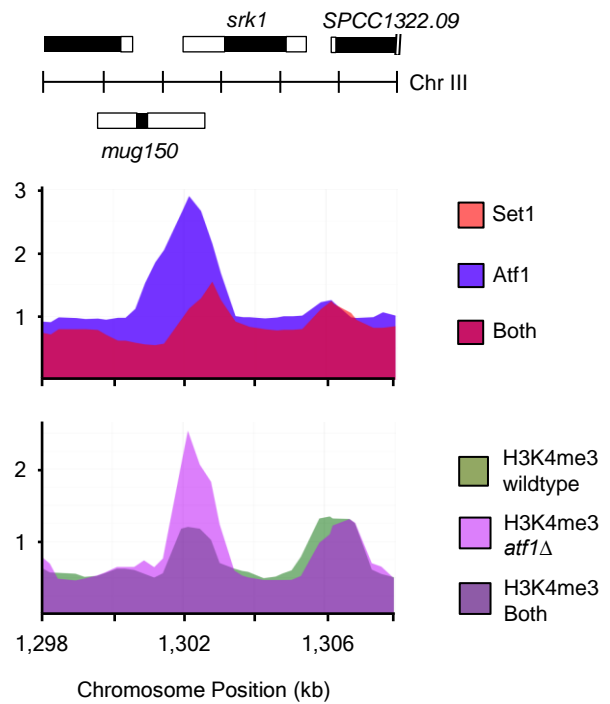

Supplement: supp [file elife_poa_e04506_Figure_3_figure_supplement_3.pdf › elife_poa_e04506_Figure_3_figure_supplement_3.pdf]

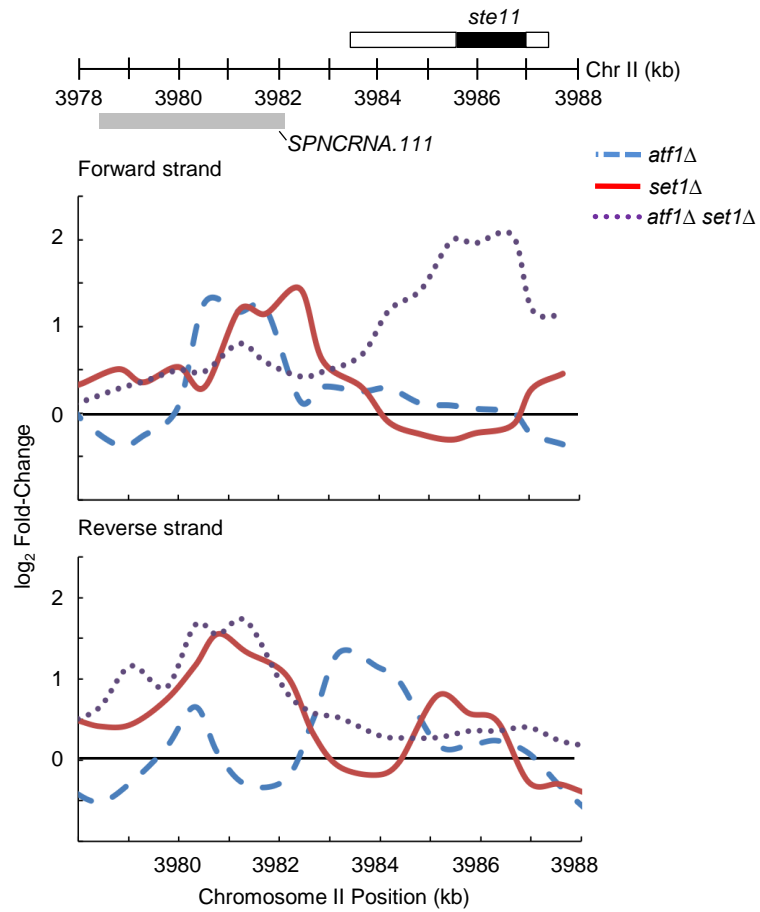

Supplement: supp [file elife_poa_e04506_Figure_3_figure_supplement_4.pdf › elife_poa_e04506_Figure_3_figure_supplement_4.pdf]

**A**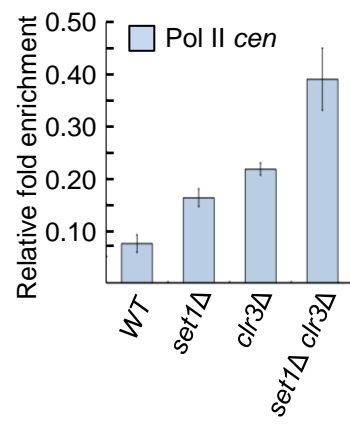**B**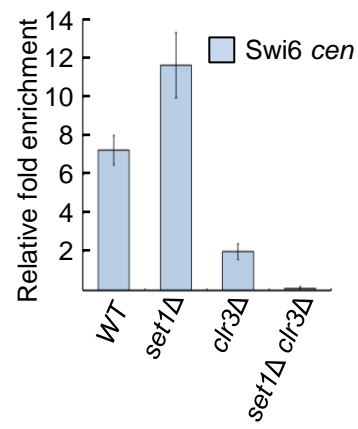

Supplement: supp [file elife_poa_e04506_Figure_4_figure_supplement_1.pdf › elife_poa_e04506_Figure_4_figure_supplement_1.pdf]

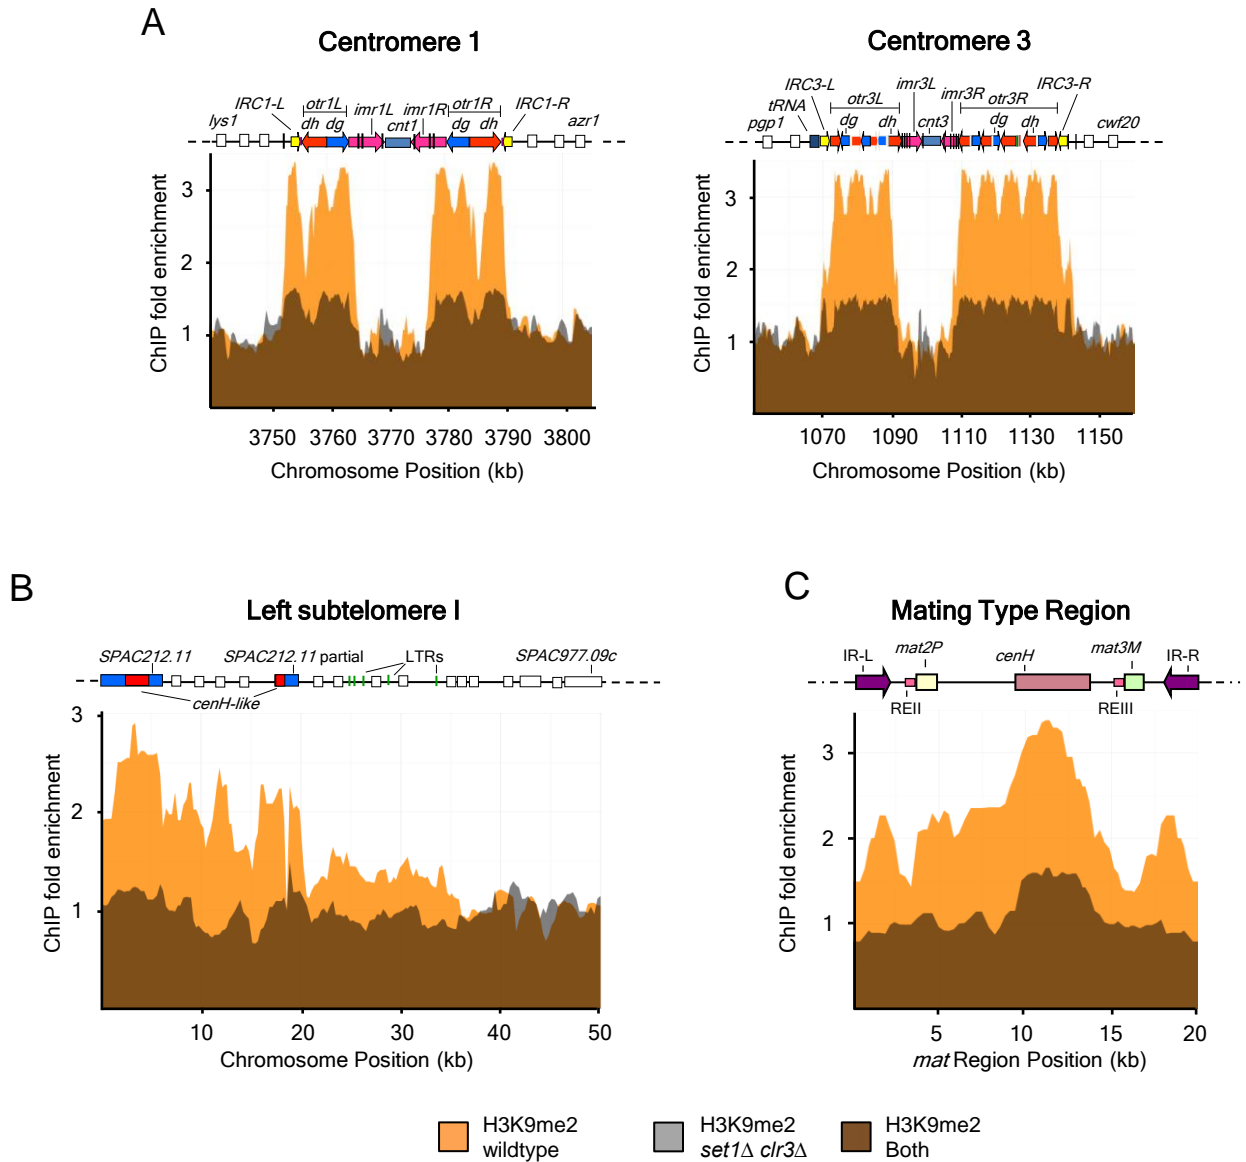

Supplement: supp [file elife_poa_e04506_Figure_4_figure_supplement_2.pdf › elife_poa_e04506_Figure_4_figure_supplement_2.pdf]

A

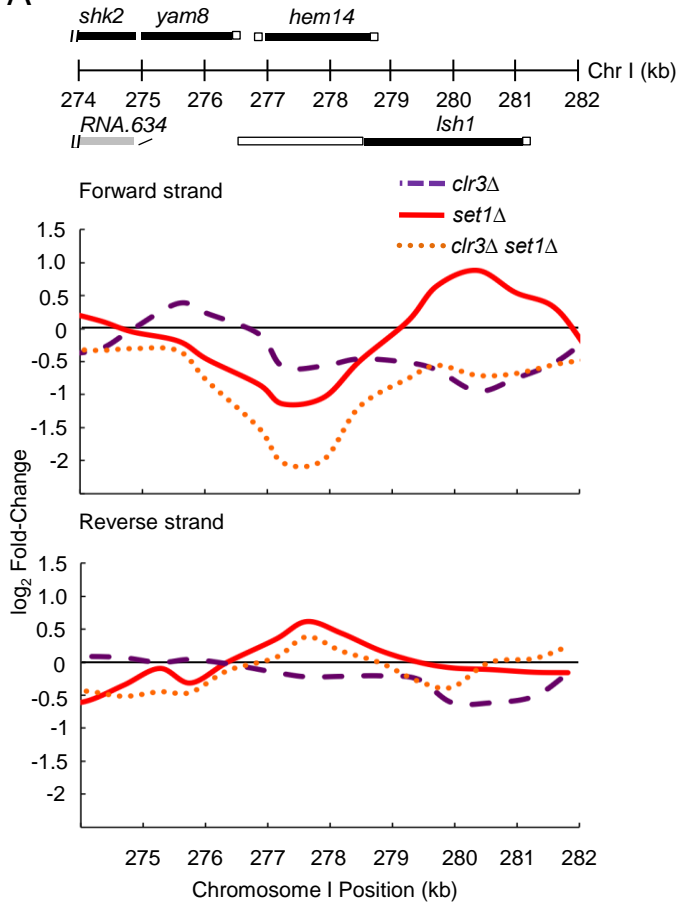

B

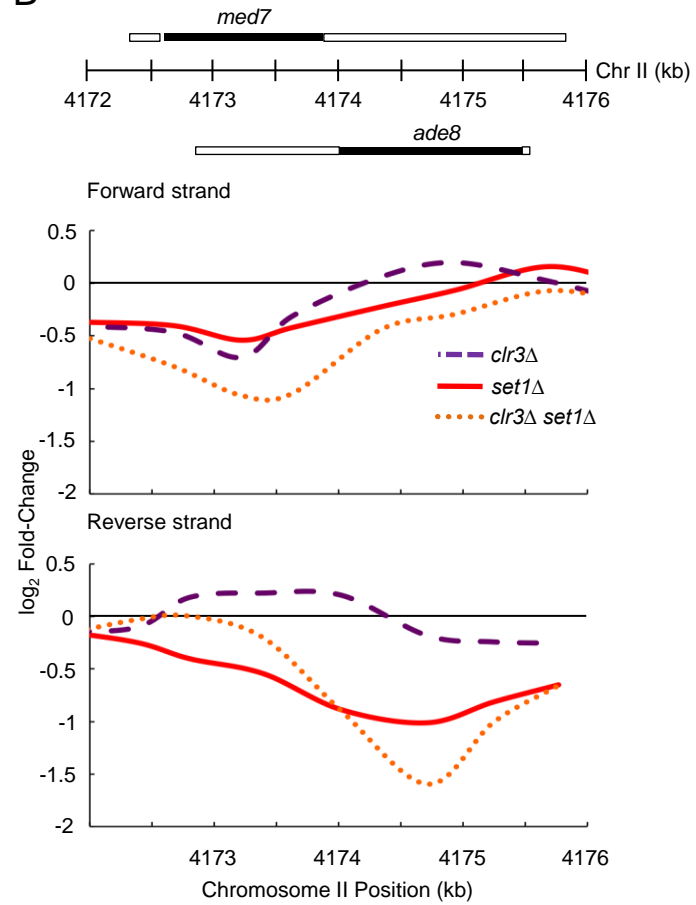

C

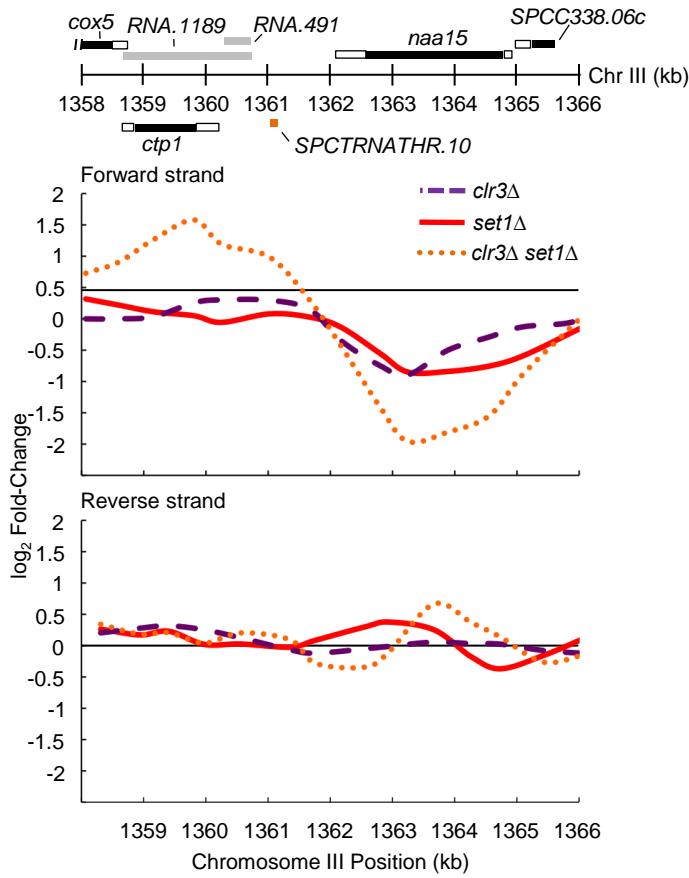

Supplement: supp [file elife_poa_e04506_Figure_5_figure_supplement_1.pdf › elife_poa_e04506_Figure_5_figure_supplement_1.pdf]

A

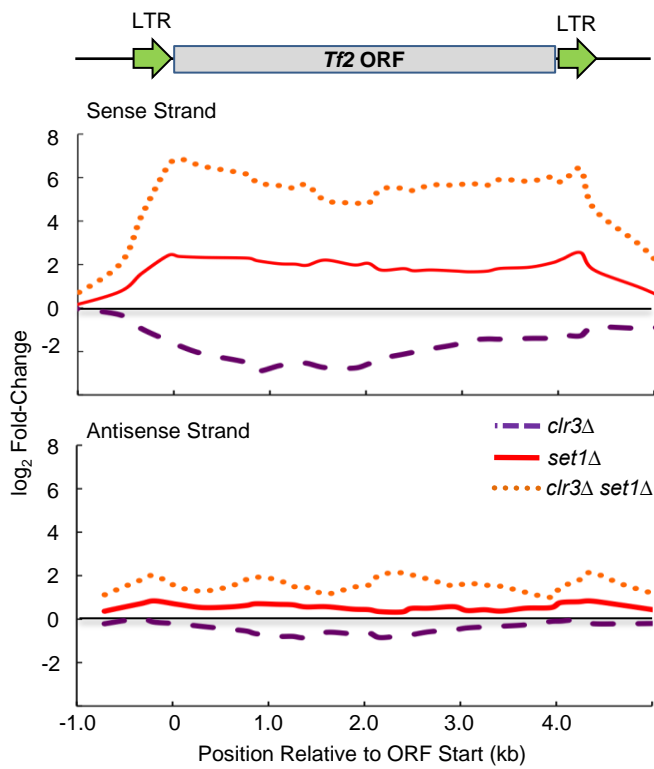

B

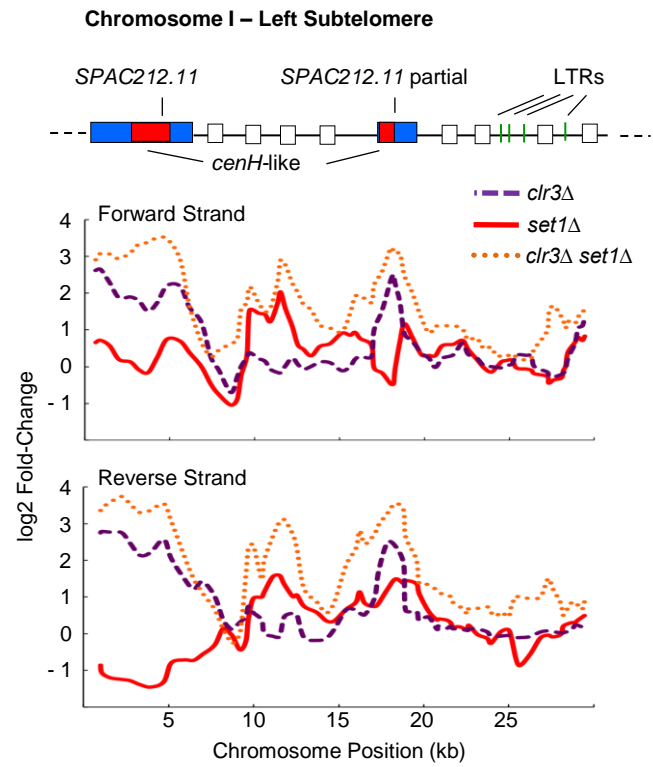

Supplement: supp [file elife_poa_e04506_Figure_5_figure_supplement_2.pdf › elife_poa_e04506_Figure_5_figure_supplement_2.pdf]

A

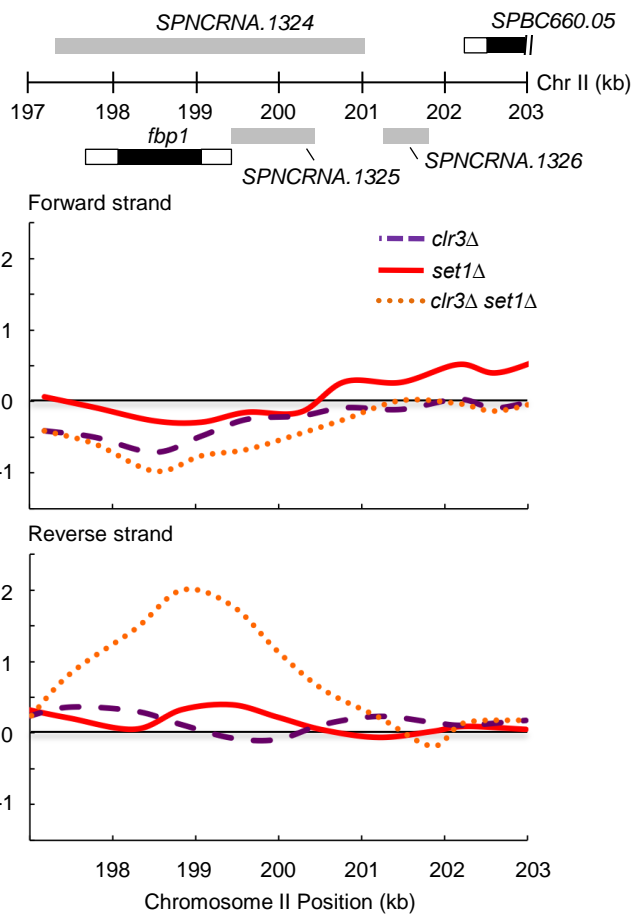

B

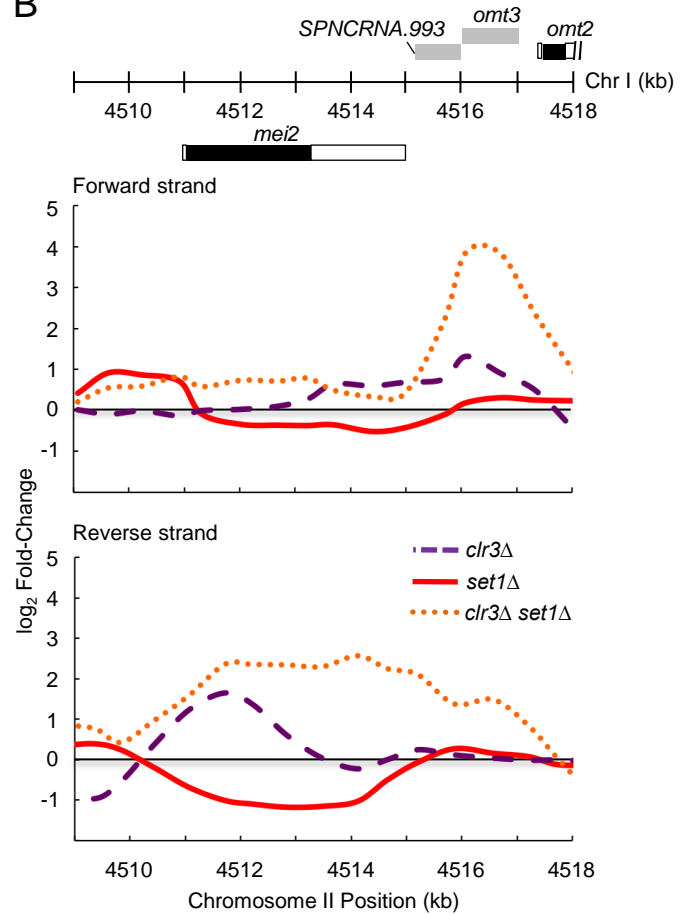

C

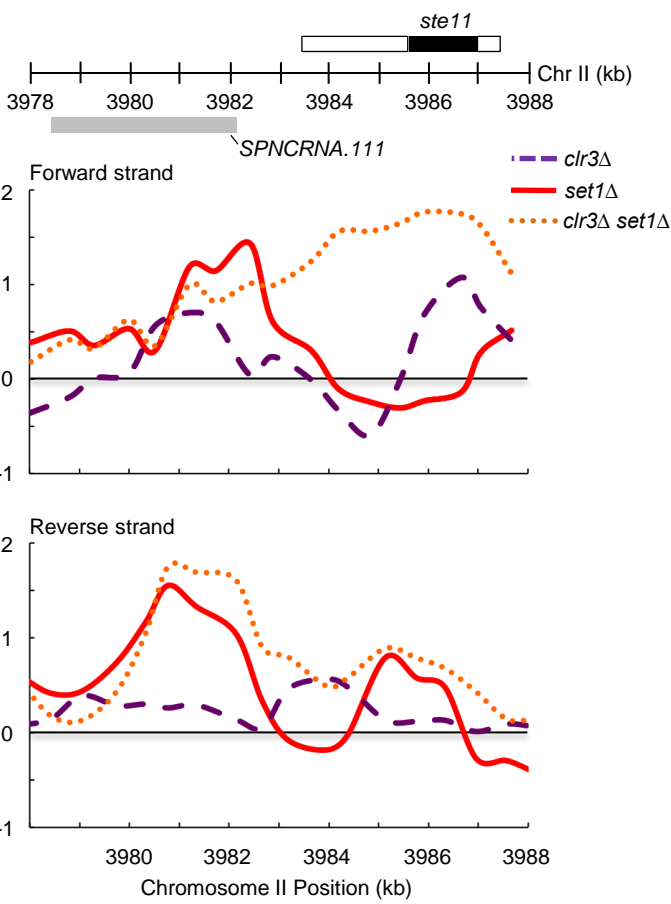

Supplement: supp [file elife_poa_e04506_Figure_5_figure_supplement_3.pdf › elife_poa_e04506_Figure_5_figure_supplement_3.pdf]

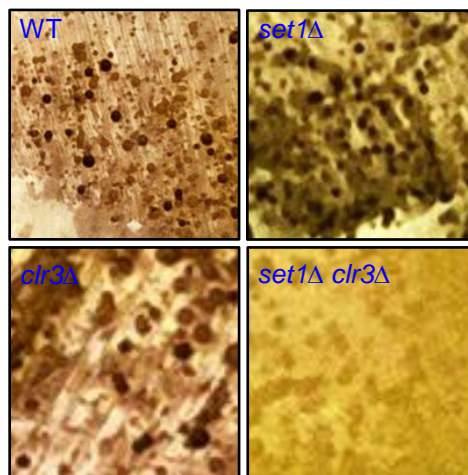

Supplement: supp [file elife_poa_e04506_Figure_5_figure_supplement_4.pdf › elife_poa_e04506_Figure_5_figure_supplement_4.pdf]
